# Supplementary material for: Identification of Key Functional Gene Signatures Indicative of Dedifferentiation in Papillary Thyroid Cancer
Source: Front Oncol. 2021 Apr 28;11:641851. doi: 10.3389/fonc.2021.641851 (PMC8113627; doi:10.3389/fonc.2021.641851)
Supplement: Supplementary file 2 [file Table_2.XLSX]

## Sheet: gsea-high
NAME	GS<br> follow link to MSigDB	GS DETAILS	SIZE	ES	NES	NOM p-val	FDR q-val	FWER p-val	RANK AT MAX	LEADING EDGE
GO_THYROID_HORMONE_METABOLIC_PROCESS	GO_THYROID_HORMONE_METABOLIC_PROCESS	Details ...	26	-0.720197	-2.15976	0	0.0173715	0.011	2215	tags=50%, list=4%, signal=52%
GO_HORMONE_BIOSYNTHETIC_PROCESS	GO_HORMONE_BIOSYNTHETIC_PROCESS	Details ...	68	-0.604827	-2.15244	0	0.00933858	0.012	9497	tags=43%, list=17%, signal=51%
GO_CELLULAR_AMINO_ACID_CATABOLIC_PROCESS	GO_CELLULAR_AMINO_ACID_CATABOLIC_PROCESS	Details ...	123	-0.604846	-2.14069	0	0.00761502	0.015	8822	tags=48%, list=16%, signal=57%
GO_ALPHA_AMINO_ACID_CATABOLIC_PROCESS	GO_ALPHA_AMINO_ACID_CATABOLIC_PROCESS	Details ...	103	-0.599685	-2.10899	0	0.0122866	0.03	8822	tags=47%, list=16%, signal=55%
GO_LIPID_OXIDATION	GO_LIPID_OXIDATION	Details ...	111	-0.624961	-2.08084	0	0.0175783	0.045	9349	tags=48%, list=17%, signal=57%
GO_AXONEME_ASSEMBLY	GO_AXONEME_ASSEMBLY	Details ...	70	-0.73775	-2.075	0	0.0155595	0.047	7509	tags=60%, list=14%, signal=69%
GO_FATTY_ACID_BETA_OXIDATION	GO_FATTY_ACID_BETA_OXIDATION	Details ...	74	-0.674509	-2.06198	0	0.0163353	0.053	9349	tags=54%, list=17%, signal=65%
GO_CILIUM_MOVEMENT	GO_CILIUM_MOVEMENT	Details ...	155	-0.619911	-2.04755	0	0.0197258	0.066	12133	tags=60%, list=22%, signal=77%
GO_MONOCARBOXYLIC_ACID_CATABOLIC_PROCESS	GO_MONOCARBOXYLIC_ACID_CATABOLIC_PROCESS	Details ...	138	-0.624652	-2.04568	0	0.0182775	0.069	9922	tags=48%, list=18%, signal=58%
GO_FATTY_ACID_CATABOLIC_PROCESS	GO_FATTY_ACID_CATABOLIC_PROCESS	Details ...	114	-0.630916	-2.03736	0	0.0188519	0.074	9922	tags=48%, list=18%, signal=59%
GO_AXONEMAL_DYNEIN_COMPLEX_ASSEMBLY	GO_AXONEMAL_DYNEIN_COMPLEX_ASSEMBLY	Details ...	33	-0.76521	-2.00839	0	0.0282368	0.106	5377	tags=52%, list=10%, signal=57%
GO_EXTRACELLULAR_TRANSPORT	GO_EXTRACELLULAR_TRANSPORT	Details ...	32	-0.738993	-2.00631	0	0.0264515	0.106	11975	tags=72%, list=22%, signal=92%
GO_REGULATION_OF_FATTY_ACID_OXIDATION	GO_REGULATION_OF_FATTY_ACID_OXIDATION	Details ...	32	-0.668372	-2.00101	0	0.0265788	0.113	2615	tags=31%, list=5%, signal=33%
GO_ASPARTATE_FAMILY_AMINO_ACID_CATABOLIC_PROCESS	GO_ASPARTATE_FAMILY_AMINO_ACID_CATABOLIC_PROCESS	Details ...	23	-0.75501	-1.98877	0	0.029884	0.134	4211	tags=61%, list=8%, signal=66%
GO_ORGANIC_HYDROXY_COMPOUND_CATABOLIC_PROCESS	GO_ORGANIC_HYDROXY_COMPOUND_CATABOLIC_PROCESS	Details ...	76	-0.573839	-1.98547	0	0.0292878	0.138	6815	tags=36%, list=12%, signal=40%
GO_TETRAPYRROLE_BIOSYNTHETIC_PROCESS	GO_TETRAPYRROLE_BIOSYNTHETIC_PROCESS	Details ...	27	-0.740456	-1.97774	0	0.0307123	0.149	7555	tags=70%, list=14%, signal=81%
GO_CILIUM_OR_FLAGELLUM_DEPENDENT_CELL_MOTILITY	GO_CILIUM_OR_FLAGELLUM_DEPENDENT_CELL_MOTILITY	Details ...	121	-0.583859	-1.97439	0	0.0306979	0.156	12133	tags=57%, list=22%, signal=73%
GO_DETOXIFICATION	GO_DETOXIFICATION	Details ...	136	-0.572044	-1.97079	0	0.0309587	0.164	12740	tags=54%, list=23%, signal=70%
GO_PORPHYRIN_CONTAINING_COMPOUND_METABOLIC_PROCESS	GO_PORPHYRIN_CONTAINING_COMPOUND_METABOLIC_PROCESS	Details ...	39	-0.670017	-1.97003	0	0.0296783	0.167	7555	tags=54%, list=14%, signal=62%
GO_ANDROGEN_METABOLIC_PROCESS	GO_ANDROGEN_METABOLIC_PROCESS	Details ...	29	-0.599851	-1.96359	0	0.031175	0.182	2900	tags=31%, list=5%, signal=33%
GO_MOTILE_CILIUM_ASSEMBLY	GO_MOTILE_CILIUM_ASSEMBLY	Details ...	23	-0.789495	-1.94862	0	0.0369318	0.212	5377	tags=61%, list=10%, signal=67%
GO_REGULATION_OF_FATTY_ACID_BETA_OXIDATION	GO_REGULATION_OF_FATTY_ACID_BETA_OXIDATION	Details ...	20	-0.700982	-1.93666	0	0.0416515	0.239	2488	tags=35%, list=4%, signal=37%
GO_MITOCHONDRIAL_RNA_METABOLIC_PROCESS	GO_MITOCHONDRIAL_RNA_METABOLIC_PROCESS	Details ...	46	-0.677692	-1.93399	0.00417537	0.0413803	0.239	8162	tags=50%, list=15%, signal=59%
GO_REGULATION_OF_APPETITE	GO_REGULATION_OF_APPETITE	Details ...	23	-0.644248	-1.93392	0	0.0396804	0.239	7266	tags=30%, list=13%, signal=35%
GO_MICROTUBULE_BUNDLE_FORMATION	GO_MICROTUBULE_BUNDLE_FORMATION	Details ...	101	-0.611633	-1.92773	0	0.0416669	0.25	7509	tags=47%, list=14%, signal=54%
GO_PROTEIN_CONTAINING_COMPLEX_REMODELING	GO_PROTEIN_CONTAINING_COMPLEX_REMODELING	Details ...	32	-0.664421	-1.92333	0	0.0426637	0.261	7753	tags=50%, list=14%, signal=58%
GO_KETONE_BIOSYNTHETIC_PROCESS	GO_KETONE_BIOSYNTHETIC_PROCESS	Details ...	44	-0.596551	-1.91379	0.002	0.0468543	0.282	7395	tags=41%, list=13%, signal=47%
GO_PROTON_TRANSMEMBRANE_TRANSPORT	GO_PROTON_TRANSMEMBRANE_TRANSPORT	Details ...	159	-0.553922	-1.91347	0.0040404	0.0455576	0.282	8429	tags=43%, list=15%, signal=51%
GO_NUCLEOSIDE_BISPHOSPHATE_METABOLIC_PROCESS	GO_NUCLEOSIDE_BISPHOSPHATE_METABOLIC_PROCESS	Details ...	138	-0.530521	-1.91029	0.004158	0.0463043	0.286	10535	tags=52%, list=19%, signal=64%
GO_HEME_METABOLIC_PROCESS	GO_HEME_METABOLIC_PROCESS	Details ...	32	-0.67292	-1.90707	0	0.0470095	0.298	7555	tags=56%, list=14%, signal=65%
GO_MITOCHONDRIAL_TRANSMEMBRANE_TRANSPORT	GO_MITOCHONDRIAL_TRANSMEMBRANE_TRANSPORT	Details ...	101	-0.627616	-1.90027	0.00205339	0.0498768	0.318	9997	tags=61%, list=18%, signal=75%
GO_SMOOTH_MUSCLE_CELL_DIFFERENTIATION	GO_SMOOTH_MUSCLE_CELL_DIFFERENTIATION	Details ...	67	-0.573078	-1.89839	0	0.0492861	0.321	7832	tags=45%, list=14%, signal=52%
GO_SPECIFICATION_OF_SYMMETRY	GO_SPECIFICATION_OF_SYMMETRY	Details ...	135	-0.52372	-1.89416	0	0.0509223	0.34	12144	tags=50%, list=22%, signal=64%
GO_EXPORT_ACROSS_PLASMA_MEMBRANE	GO_EXPORT_ACROSS_PLASMA_MEMBRANE	Details ...	60	-0.559647	-1.8929	0	0.0500977	0.341	5506	tags=28%, list=10%, signal=31%
GO_PHENOL_CONTAINING_COMPOUND_METABOLIC_PROCESS	GO_PHENOL_CONTAINING_COMPOUND_METABOLIC_PROCESS	Details ...	109	-0.500108	-1.88272	0	0.0550402	0.357	7922	tags=37%, list=14%, signal=43%
GO_POSITIVE_REGULATION_OF_HEART_RATE	GO_POSITIVE_REGULATION_OF_HEART_RATE	Details ...	27	-0.60241	-1.8784	0.00215983	0.0567425	0.365	10420	tags=56%, list=19%, signal=68%
GO_SPERM_MOTILITY	GO_SPERM_MOTILITY	Details ...	96	-0.550154	-1.87272	0	0.0589998	0.374	12682	tags=54%, list=23%, signal=70%
GO_PROTEIN_PEPTIDYL_PROLYL_ISOMERIZATION	GO_PROTEIN_PEPTIDYL_PROLYL_ISOMERIZATION	Details ...	43	-0.580758	-1.8712	0.00426439	0.0586364	0.377	13066	tags=40%, list=24%, signal=52%
GO_ALCOHOL_CATABOLIC_PROCESS	GO_ALCOHOL_CATABOLIC_PROCESS	Details ...	55	-0.544995	-1.8672	0	0.0602612	0.385	6815	tags=35%, list=12%, signal=39%
GO_TETRAPYRROLE_METABOLIC_PROCESS	GO_TETRAPYRROLE_METABOLIC_PROCESS	Details ...	61	-0.566996	-1.86132	0	0.0635507	0.405	7799	tags=46%, list=14%, signal=53%
GO_PHOTORECEPTOR_CELL_DEVELOPMENT	GO_PHOTORECEPTOR_CELL_DEVELOPMENT	Details ...	48	-0.559826	-1.85406	0	0.0676444	0.423	9113	tags=35%, list=16%, signal=42%
GO_STEROID_BIOSYNTHETIC_PROCESS	GO_STEROID_BIOSYNTHETIC_PROCESS	Details ...	197	-0.468097	-1.85161	0	0.0677568	0.425	9128	tags=34%, list=16%, signal=41%
GO_REGULATION_OF_MITOCHONDRIAL_GENE_EXPRESSION	GO_REGULATION_OF_MITOCHONDRIAL_GENE_EXPRESSION	Details ...	30	-0.692123	-1.84884	0.00197628	0.0687058	0.431	11657	tags=70%, list=21%, signal=89%
GO_BILE_ACID_METABOLIC_PROCESS	GO_BILE_ACID_METABOLIC_PROCESS	Details ...	48	-0.546797	-1.84563	0	0.0697658	0.442	8716	tags=44%, list=16%, signal=52%
GO_PURINE_NUCLEOTIDE_TRANSPORT	GO_PURINE_NUCLEOTIDE_TRANSPORT	Details ...	34	-0.594753	-1.84486	0.00632911	0.0689208	0.445	7490	tags=44%, list=14%, signal=51%
GO_FATTY_ACID_TRANSPORT	GO_FATTY_ACID_TRANSPORT	Details ...	101	-0.46244	-1.84045	0	0.0714684	0.46	9349	tags=37%, list=17%, signal=44%
GO_NUCLEOTIDE_TRANSPORT	GO_NUCLEOTIDE_TRANSPORT	Details ...	38	-0.5895	-1.83974	0.00215517	0.0706168	0.461	7490	tags=42%, list=14%, signal=49%
GO_AROMATIC_AMINO_ACID_FAMILY_METABOLIC_PROCESS	GO_AROMATIC_AMINO_ACID_FAMILY_METABOLIC_PROCESS	Details ...	40	-0.573082	-1.83815	0.0060241	0.0703833	0.464	12574	tags=52%, list=23%, signal=68%
GO_NEGATIVE_REGULATION_OF_PEPTIDE_HORMONE_SECRETION	GO_NEGATIVE_REGULATION_OF_PEPTIDE_HORMONE_SECRETION	Details ...	42	-0.527228	-1.8312	0	0.075044	0.48	8417	tags=36%, list=15%, signal=42%
GO_CYTOCHROME_COMPLEX_ASSEMBLY	GO_CYTOCHROME_COMPLEX_ASSEMBLY	Details ...	36	-0.765648	-1.82956	0.00595238	0.0749819	0.486	11350	tags=83%, list=20%, signal=105%
GO_BRANCHED_CHAIN_AMINO_ACID_METABOLIC_PROCESS	GO_BRANCHED_CHAIN_AMINO_ACID_METABOLIC_PROCESS	Details ...	25	-0.758672	-1.82348	0.00641026	0.0785262	0.498	6647	tags=72%, list=12%, signal=82%
GO_STEROID_HORMONE_BIOSYNTHETIC_PROCESS	GO_STEROID_HORMONE_BIOSYNTHETIC_PROCESS	Details ...	49	-0.541794	-1.82028	0	0.079751	0.508	9497	tags=35%, list=17%, signal=42%
GO_VASCULAR_ASSOCIATED_SMOOTH_MUSCLE_CELL_DIFFERENTIATION	GO_VASCULAR_ASSOCIATED_SMOOTH_MUSCLE_CELL_DIFFERENTIATION	Details ...	35	-0.577718	-1.81539	0.00217391	0.0820964	0.515	7832	tags=40%, list=14%, signal=47%
GO_THIOESTER_METABOLIC_PROCESS	GO_THIOESTER_METABOLIC_PROCESS	Details ...	104	-0.526433	-1.8149	0.0105708	0.081064	0.519	10535	tags=53%, list=19%, signal=65%
GO_BILE_ACID_BIOSYNTHETIC_PROCESS	GO_BILE_ACID_BIOSYNTHETIC_PROCESS	Details ...	37	-0.548079	-1.8091	0	0.0849175	0.533	8716	tags=43%, list=16%, signal=51%
GO_ZINC_ION_HOMEOSTASIS	GO_ZINC_ION_HOMEOSTASIS	Details ...	39	-0.578272	-1.80613	0.0123457	0.0864598	0.54	3133	tags=31%, list=6%, signal=33%
GO_CELLULAR_OXIDANT_DETOXIFICATION	GO_CELLULAR_OXIDANT_DETOXIFICATION	Details ...	101	-0.524645	-1.80595	0	0.0851256	0.541	12740	tags=52%, list=23%, signal=68%
GO_RDNA_HETEROCHROMATIN_ASSEMBLY	GO_RDNA_HETEROCHROMATIN_ASSEMBLY	Details ...	38	-0.647049	-1.79842	0.00623701	0.0907986	0.557	9263	tags=50%, list=17%, signal=60%
GO_CELLULAR_RESPIRATION	GO_CELLULAR_RESPIRATION	Details ...	186	-0.621584	-1.79769	0.0178571	0.0899148	0.558	9044	tags=52%, list=16%, signal=61%
GO_REGULATION_OF_RESPONSE_TO_EXTRACELLULAR_STIMULUS	GO_REGULATION_OF_RESPONSE_TO_EXTRACELLULAR_STIMULUS	Details ...	25	-0.590565	-1.79766	0.00428265	0.0884514	0.559	5861	tags=28%, list=11%, signal=31%
GO_PIGMENT_METABOLIC_PROCESS	GO_PIGMENT_METABOLIC_PROCESS	Details ...	72	-0.525423	-1.79441	0.00417537	0.0901875	0.567	7618	tags=35%, list=14%, signal=40%
GO_MEMBRANE_DEPOLARIZATION	GO_MEMBRANE_DEPOLARIZATION	Details ...	90	-0.466029	-1.79344	0	0.0897182	0.568	9652	tags=37%, list=17%, signal=44%
GO_SULFUR_COMPOUND_TRANSPORT	GO_SULFUR_COMPOUND_TRANSPORT	Details ...	49	-0.53058	-1.78722	0.0021097	0.0955875	0.586	7906	tags=43%, list=14%, signal=50%
GO_SIGNAL_TRANSDUCTION_INVOLVED_IN_REGULATION_OF_GENE_EXPRESSION	GO_SIGNAL_TRANSDUCTION_INVOLVED_IN_REGULATION_OF_GENE_EXPRESSION	Details ...	20	-0.617801	-1.78424	0.00631579	0.0970888	0.592	8929	tags=50%, list=16%, signal=60%
GO_REGULATION_OF_STEROID_METABOLIC_PROCESS	GO_REGULATION_OF_STEROID_METABOLIC_PROCESS	Details ...	131	-0.466229	-1.78212	0.002	0.0979931	0.597	8906	tags=33%, list=16%, signal=39%
GO_HYDROGEN_PEROXIDE_CATABOLIC_PROCESS	GO_HYDROGEN_PEROXIDE_CATABOLIC_PROCESS	Details ...	32	-0.626228	-1.77651	0.00421941	0.10263	0.613	12740	tags=59%, list=23%, signal=77%
GO_RESPIRATORY_CHAIN_COMPLEX_IV_ASSEMBLY	GO_RESPIRATORY_CHAIN_COMPLEX_IV_ASSEMBLY	Details ...	25	-0.773324	-1.77583	0.00200803	0.101714	0.614	10917	tags=84%, list=20%, signal=105%
GO_CELLULAR_RESPONSE_TO_TOXIC_SUBSTANCE	GO_CELLULAR_RESPONSE_TO_TOXIC_SUBSTANCE	Details ...	120	-0.507944	-1.77364	0.00206186	0.102829	0.618	9939	tags=44%, list=18%, signal=54%
GO_CELLULAR_MODIFIED_AMINO_ACID_CATABOLIC_PROCESS	GO_CELLULAR_MODIFIED_AMINO_ACID_CATABOLIC_PROCESS	Details ...	32	-0.566895	-1.77364	0.00622407	0.101339	0.618	6377	tags=31%, list=11%, signal=35%
GO_NEURONAL_ACTION_POTENTIAL	GO_NEURONAL_ACTION_POTENTIAL	Details ...	34	-0.533259	-1.77046	0.00438597	0.103212	0.629	8498	tags=41%, list=15%, signal=49%
GO_MONOSACCHARIDE_BIOSYNTHETIC_PROCESS	GO_MONOSACCHARIDE_BIOSYNTHETIC_PROCESS	Details ...	100	-0.495274	-1.77013	0	0.101985	0.63	7939	tags=36%, list=14%, signal=42%
GO_MITOCHONDRIAL_CYTOCHROME_C_OXIDASE_ASSEMBLY	GO_MITOCHONDRIAL_CYTOCHROME_C_OXIDASE_ASSEMBLY	Details ...	21	-0.786118	-1.76978	0.00196464	0.100999	0.63	10917	tags=90%, list=20%, signal=113%
GO_EYE_PHOTORECEPTOR_CELL_DEVELOPMENT	GO_EYE_PHOTORECEPTOR_CELL_DEVELOPMENT	Details ...	35	-0.547409	-1.76956	0.00213675	0.0998822	0.631	8109	tags=31%, list=15%, signal=37%
GO_CELLULAR_MODIFIED_AMINO_ACID_METABOLIC_PROCESS	GO_CELLULAR_MODIFIED_AMINO_ACID_METABOLIC_PROCESS	Details ...	189	-0.437197	-1.76947	0.00203666	0.0986247	0.631	7103	tags=31%, list=13%, signal=36%
GO_LONG_CHAIN_FATTY_ACID_TRANSPORT	GO_LONG_CHAIN_FATTY_ACID_TRANSPORT	Details ...	75	-0.450226	-1.76813	0.00207469	0.0985792	0.636	9349	tags=39%, list=17%, signal=46%
GO_ACROSOME_REACTION	GO_ACROSOME_REACTION	Details ...	39	-0.545446	-1.76611	0.00214592	0.0994269	0.642	9969	tags=44%, list=18%, signal=53%
GO_POSITIVE_REGULATION_OF_HEART_CONTRACTION	GO_POSITIVE_REGULATION_OF_HEART_CONTRACTION	Details ...	42	-0.520158	-1.76408	0.0043573	0.100157	0.646	12223	tags=50%, list=22%, signal=64%
GO_POSITIVE_REGULATION_OF_BLOOD_PRESSURE	GO_POSITIVE_REGULATION_OF_BLOOD_PRESSURE	Details ...	37	-0.545981	-1.76383	0.00419287	0.0991987	0.646	7784	tags=41%, list=14%, signal=47%
GO_PROTEIN_LIPID_COMPLEX_SUBUNIT_ORGANIZATION	GO_PROTEIN_LIPID_COMPLEX_SUBUNIT_ORGANIZATION	Details ...	54	-0.534246	-1.76178	0.00410678	0.0997669	0.649	7753	tags=41%, list=14%, signal=47%
GO_REGULATION_OF_MESODERM_DEVELOPMENT	GO_REGULATION_OF_MESODERM_DEVELOPMENT	Details ...	20	-0.608887	-1.76089	0.00408998	0.09945	0.651	9559	tags=40%, list=17%, signal=48%
GO_OXIDATIVE_PHOSPHORYLATION	GO_OXIDATIVE_PHOSPHORYLATION	Details ...	149	-0.675606	-1.75994	0.0220884	0.0991208	0.656	9474	tags=61%, list=17%, signal=73%
GO_LEFT_RIGHT_PATTERN_FORMATION	GO_LEFT_RIGHT_PATTERN_FORMATION	Details ...	22	-0.640344	-1.7478	0.00845666	0.11102	0.692	7452	tags=59%, list=13%, signal=68%
GO_ADAPTIVE_THERMOGENESIS	GO_ADAPTIVE_THERMOGENESIS	Details ...	155	-0.451328	-1.74441	0.00204499	0.11334	0.701	7806	tags=31%, list=14%, signal=36%
GO_PROTEIN_TRANSPORT_ALONG_MICROTUBULE	GO_PROTEIN_TRANSPORT_ALONG_MICROTUBULE	Details ...	68	-0.570862	-1.7438	0.0186722	0.112506	0.701	8074	tags=44%, list=15%, signal=52%
GO_REGULATION_OF_HORMONE_METABOLIC_PROCESS	GO_REGULATION_OF_HORMONE_METABOLIC_PROCESS	Details ...	32	-0.560359	-1.74341	0.0020284	0.111677	0.701	7570	tags=44%, list=14%, signal=51%
GO_OLIGOSACCHARIDE_LIPID_INTERMEDIATE_BIOSYNTHETIC_PROCESS	GO_OLIGOSACCHARIDE_LIPID_INTERMEDIATE_BIOSYNTHETIC_PROCESS	Details ...	21	-0.730645	-1.74322	0.0102459	0.110542	0.701	10637	tags=76%, list=19%, signal=94%
GO_PROTEIN_KINASE_C_SIGNALING	GO_PROTEIN_KINASE_C_SIGNALING	Details ...	32	-0.563139	-1.74296	0.00201207	0.109511	0.703	7758	tags=38%, list=14%, signal=44%
GO_PROTEIN_TRANSMEMBRANE_TRANSPORT	GO_PROTEIN_TRANSMEMBRANE_TRANSPORT	Details ...	60	-0.572665	-1.74191	0.00616016	0.109168	0.704	12790	tags=55%, list=23%, signal=71%
GO_MANNOSYLATION	GO_MANNOSYLATION	Details ...	37	-0.620511	-1.7416	0.0105485	0.108251	0.704	10637	tags=59%, list=19%, signal=74%
GO_REGULATION_OF_OXIDATIVE_PHOSPHORYLATION	GO_REGULATION_OF_OXIDATIVE_PHOSPHORYLATION	Details ...	32	-0.568353	-1.74058	0.0101215	0.108448	0.707	12814	tags=53%, list=23%, signal=69%
GO_ATP_TRANSPORT	GO_ATP_TRANSPORT	Details ...	28	-0.581696	-1.73694	0.0131579	0.110861	0.711	8749	tags=46%, list=16%, signal=55%
GO_INNER_EAR_RECEPTOR_CELL_DEVELOPMENT	GO_INNER_EAR_RECEPTOR_CELL_DEVELOPMENT	Details ...	43	-0.495955	-1.73606	0.004158	0.110762	0.713	8134	tags=44%, list=15%, signal=52%
GO_INTRACILIARY_TRANSPORT_INVOLVED_IN_CILIUM_ASSEMBLY	GO_INTRACILIARY_TRANSPORT_INVOLVED_IN_CILIUM_ASSEMBLY	Details ...	40	-0.649811	-1.73464	0.00638298	0.111257	0.718	7910	tags=50%, list=14%, signal=58%
GO_NEGATIVE_REGULATION_OF_CARBOHYDRATE_METABOLIC_PROCESS	GO_NEGATIVE_REGULATION_OF_CARBOHYDRATE_METABOLIC_PROCESS	Details ...	51	-0.469266	-1.7337	0.00614754	0.111118	0.721	8395	tags=33%, list=15%, signal=39%
GO_ASPARTATE_FAMILY_AMINO_ACID_METABOLIC_PROCESS	GO_ASPARTATE_FAMILY_AMINO_ACID_METABOLIC_PROCESS	Details ...	50	-0.553635	-1.73301	0.012474	0.110745	0.722	9615	tags=48%, list=17%, signal=58%
GO_INTRACILIARY_TRANSPORT	GO_INTRACILIARY_TRANSPORT	Details ...	53	-0.618849	-1.72578	0.0168421	0.117456	0.732	7910	tags=47%, list=14%, signal=55%
GO_SPERMATID_DIFFERENTIATION	GO_SPERMATID_DIFFERENTIATION	Details ...	166	-0.45166	-1.72459	0	0.117471	0.734	11347	tags=37%, list=20%, signal=46%
GO_SERINE_FAMILY_AMINO_ACID_METABOLIC_PROCESS	GO_SERINE_FAMILY_AMINO_ACID_METABOLIC_PROCESS	Details ...	40	-0.580219	-1.72249	0.00806452	0.118582	0.738	4457	tags=28%, list=8%, signal=30%
GO_MITOCHONDRIAL_GENE_EXPRESSION	GO_MITOCHONDRIAL_GENE_EXPRESSION	Details ...	165	-0.607248	-1.72181	0.0241449	0.11801	0.738	9339	tags=49%, list=17%, signal=59%
GO_RESPIRATORY_ELECTRON_TRANSPORT_CHAIN	GO_RESPIRATORY_ELECTRON_TRANSPORT_CHAIN	Details ...	115	-0.681297	-1.72112	0.0297619	0.117576	0.739	9044	tags=60%, list=16%, signal=72%
GO_AEROBIC_RESPIRATION	GO_AEROBIC_RESPIRATION	Details ...	87	-0.635534	-1.71749	0.0285714	0.120157	0.748	12267	tags=62%, list=22%, signal=80%
GO_INNER_MITOCHONDRIAL_MEMBRANE_ORGANIZATION	GO_INNER_MITOCHONDRIAL_MEMBRANE_ORGANIZATION	Details ...	52	-0.6891	-1.71683	0.0242424	0.119789	0.748	8352	tags=63%, list=15%, signal=75%
GO_REGULATION_OF_LIPOPROTEIN_LIPASE_ACTIVITY	GO_REGULATION_OF_LIPOPROTEIN_LIPASE_ACTIVITY	Details ...	24	-0.624951	-1.71351	0.00621118	0.122336	0.751	8067	tags=46%, list=15%, signal=54%
GO_CELLULAR_HORMONE_METABOLIC_PROCESS	GO_CELLULAR_HORMONE_METABOLIC_PROCESS	Details ...	134	-0.438383	-1.71255	0	0.122178	0.752	6324	tags=25%, list=11%, signal=29%
GO_CARBOHYDRATE_DERIVATIVE_TRANSPORT	GO_CARBOHYDRATE_DERIVATIVE_TRANSPORT	Details ...	94	-0.458172	-1.71229	0.0109649	0.121276	0.752	6590	tags=30%, list=12%, signal=34%
GO_CELLULAR_RESPONSE_TO_ZINC_ION	GO_CELLULAR_RESPONSE_TO_ZINC_ION	Details ...	24	-0.634198	-1.71211	0.0193548	0.120394	0.753	8655	tags=50%, list=16%, signal=59%
GO_ETHANOL_METABOLIC_PROCESS	GO_ETHANOL_METABOLIC_PROCESS	Details ...	22	-0.601269	-1.71033	0.0148305	0.12117	0.758	4114	tags=36%, list=7%, signal=39%
GO_MONOCARBOXYLIC_ACID_TRANSPORT	GO_MONOCARBOXYLIC_ACID_TRANSPORT	Details ...	174	-0.421962	-1.71018	0	0.120175	0.758	9349	tags=33%, list=17%, signal=39%
GO_PROTEIN_TRANSMEMBRANE_IMPORT_INTO_INTRACELLULAR_ORGANELLE	GO_PROTEIN_TRANSMEMBRANE_IMPORT_INTO_INTRACELLULAR_ORGANELLE	Details ...	35	-0.63325	-1.71004	0.01222	0.119247	0.758	12790	tags=57%, list=23%, signal=74%
GO_POSITIVE_REGULATION_OF_MULTICELLULAR_ORGANISM_GROWTH	GO_POSITIVE_REGULATION_OF_MULTICELLULAR_ORGANISM_GROWTH	Details ...	33	-0.52895	-1.70956	0.0107066	0.118623	0.758	3656	tags=27%, list=7%, signal=29%
GO_ELECTRON_TRANSPORT_CHAIN	GO_ELECTRON_TRANSPORT_CHAIN	Details ...	183	-0.583348	-1.70925	0.0321932	0.117932	0.758	9252	tags=54%, list=17%, signal=64%
GO_CAMP_METABOLIC_PROCESS	GO_CAMP_METABOLIC_PROCESS	Details ...	22	-0.611927	-1.70391	0.00207469	0.122677	0.769	5966	tags=50%, list=11%, signal=56%
GO_TRNA_MODIFICATION	GO_TRNA_MODIFICATION	Details ...	89	-0.562573	-1.70328	0.0164609	0.12225	0.77	11235	tags=51%, list=20%, signal=63%
GO_NEGATIVE_REGULATION_OF_SMALL_MOLECULE_METABOLIC_PROCESS	GO_NEGATIVE_REGULATION_OF_SMALL_MOLECULE_METABOLIC_PROCESS	Details ...	104	-0.440415	-1.70285	0.00215054	0.121782	0.772	9349	tags=29%, list=17%, signal=35%
GO_MITOCHONDRIAL_RESPIRATORY_CHAIN_COMPLEX_ASSEMBLY	GO_MITOCHONDRIAL_RESPIRATORY_CHAIN_COMPLEX_ASSEMBLY	Details ...	101	-0.697681	-1.70255	0.0321285	0.121037	0.772	12732	tags=74%, list=23%, signal=96%
GO_CRISTAE_FORMATION	GO_CRISTAE_FORMATION	Details ...	35	-0.723299	-1.70212	0.0328542	0.1205	0.775	8352	tags=66%, list=15%, signal=77%
GO_PHASIC_SMOOTH_MUSCLE_CONTRACTION	GO_PHASIC_SMOOTH_MUSCLE_CONTRACTION	Details ...	21	-0.582772	-1.70043	0.0111359	0.121146	0.779	9118	tags=38%, list=16%, signal=46%
GO_C21_STEROID_HORMONE_BIOSYNTHETIC_PROCESS	GO_C21_STEROID_HORMONE_BIOSYNTHETIC_PROCESS	Details ...	26	-0.577235	-1.69802	0.00635593	0.122452	0.78	9497	tags=38%, list=17%, signal=46%
GO_RIBONUCLEOTIDE_CATABOLIC_PROCESS	GO_RIBONUCLEOTIDE_CATABOLIC_PROCESS	Details ...	32	-0.49629	-1.69601	0.00589391	0.123705	0.784	4411	tags=41%, list=8%, signal=44%
GO_COPULATION	GO_COPULATION	Details ...	20	-0.576994	-1.69552	0.00858369	0.123168	0.785	4330	tags=30%, list=8%, signal=33%
GO_PEROXISOME_ORGANIZATION	GO_PEROXISOME_ORGANIZATION	Details ...	83	-0.528541	-1.69461	0.0186335	0.123252	0.786	9981	tags=40%, list=18%, signal=48%
GO_BICARBONATE_TRANSPORT	GO_BICARBONATE_TRANSPORT	Details ...	43	-0.520842	-1.69269	0.0106383	0.124291	0.79	9197	tags=37%, list=17%, signal=45%
GO_PIGMENT_BIOSYNTHETIC_PROCESS	GO_PIGMENT_BIOSYNTHETIC_PROCESS	Details ...	57	-0.516233	-1.69183	0.0211864	0.124327	0.79	7618	tags=37%, list=14%, signal=43%
GO_REGULATION_OF_CELL_MATURATION	GO_REGULATION_OF_CELL_MATURATION	Details ...	24	-0.543031	-1.69175	0.0131004	0.123437	0.79	4706	tags=33%, list=8%, signal=36%
GO_ENDOPLASMIC_RETICULUM_TO_CYTOSOL_TRANSPORT	GO_ENDOPLASMIC_RETICULUM_TO_CYTOSOL_TRANSPORT	Details ...	28	-0.662748	-1.69093	0.0182927	0.123358	0.793	9984	tags=68%, list=18%, signal=83%
GO_TRNA_METHYLATION	GO_TRNA_METHYLATION	Details ...	40	-0.611874	-1.6847	0.0289256	0.129483	0.813	7017	tags=45%, list=13%, signal=51%
GO_ACETYL_COA_METABOLIC_PROCESS	GO_ACETYL_COA_METABOLIC_PROCESS	Details ...	38	-0.599981	-1.68424	0.0334029	0.129059	0.815	12576	tags=66%, list=23%, signal=85%
GO_SUBPALLIUM_DEVELOPMENT	GO_SUBPALLIUM_DEVELOPMENT	Details ...	24	-0.576861	-1.68194	0.0113379	0.130504	0.816	9121	tags=46%, list=16%, signal=55%
GO_GPI_ANCHOR_METABOLIC_PROCESS	GO_GPI_ANCHOR_METABOLIC_PROCESS	Details ...	33	-0.615878	-1.68128	0.0359281	0.130115	0.817	12856	tags=58%, list=23%, signal=75%
GO_POSITIVE_REGULATION_OF_STEROID_METABOLIC_PROCESS	GO_POSITIVE_REGULATION_OF_STEROID_METABOLIC_PROCESS	Details ...	31	-0.527195	-1.68047	0.00407332	0.129992	0.817	8716	tags=35%, list=16%, signal=42%
GO_POSITIVE_REGULATION_OF_CELLULAR_CARBOHYDRATE_METABOLIC_PROCESS	GO_POSITIVE_REGULATION_OF_CELLULAR_CARBOHYDRATE_METABOLIC_PROCESS	Details ...	62	-0.472346	-1.68039	0.00208333	0.12906	0.817	4723	tags=27%, list=9%, signal=30%
GO_SMAD_PROTEIN_SIGNAL_TRANSDUCTION	GO_SMAD_PROTEIN_SIGNAL_TRANSDUCTION	Details ...	78	-0.477494	-1.68038	0.00819672	0.128096	0.817	10545	tags=45%, list=19%, signal=55%
GO_PROTEIN_N_LINKED_GLYCOSYLATION	GO_PROTEIN_N_LINKED_GLYCOSYLATION	Details ...	73	-0.540152	-1.67965	0.0266393	0.127829	0.817	10637	tags=52%, list=19%, signal=64%
GO_UBIQUINONE_METABOLIC_PROCESS	GO_UBIQUINONE_METABOLIC_PROCESS	Details ...	20	-0.671256	-1.67916	0.0209205	0.127346	0.817	12615	tags=75%, list=23%, signal=97%
GO_3_PHOSPHOADENOSINE_5_PHOSPHOSULFATE_METABOLIC_PROCESS	GO_3_PHOSPHOADENOSINE_5_PHOSPHOSULFATE_METABOLIC_PROCESS	Details ...	24	-0.528723	-1.67751	0.0126582	0.128392	0.819	6599	tags=42%, list=12%, signal=47%
GO_PRIMARY_ALCOHOL_METABOLIC_PROCESS	GO_PRIMARY_ALCOHOL_METABOLIC_PROCESS	Details ...	94	-0.459346	-1.67714	0.00626305	0.127776	0.819	6452	tags=28%, list=12%, signal=31%
GO_POSITIVE_REGULATION_OF_COLD_INDUCED_THERMOGENESIS	GO_POSITIVE_REGULATION_OF_COLD_INDUCED_THERMOGENESIS	Details ...	97	-0.444611	-1.67601	0.00414938	0.128081	0.82	7806	tags=32%, list=14%, signal=37%
GO_PROTEIN_EXIT_FROM_ENDOPLASMIC_RETICULUM	GO_PROTEIN_EXIT_FROM_ENDOPLASMIC_RETICULUM	Details ...	48	-0.560179	-1.67558	0.0138614	0.127619	0.821	10945	tags=50%, list=20%, signal=62%
GO_EMBRYONIC_HEMOPOIESIS	GO_EMBRYONIC_HEMOPOIESIS	Details ...	23	-0.585198	-1.67407	0.0278373	0.128495	0.825	3598	tags=39%, list=6%, signal=42%
GO_NEUROTRANSMITTER_METABOLIC_PROCESS	GO_NEUROTRANSMITTER_METABOLIC_PROCESS	Details ...	30	-0.527663	-1.67351	0.0123457	0.128344	0.825	8822	tags=43%, list=16%, signal=51%
GO_CELL_REDOX_HOMEOSTASIS	GO_CELL_REDOX_HOMEOSTASIS	Details ...	59	-0.538088	-1.67283	0.0227273	0.128219	0.825	9351	tags=46%, list=17%, signal=55%
GO_TEMPERATURE_HOMEOSTASIS	GO_TEMPERATURE_HOMEOSTASIS	Details ...	174	-0.42644	-1.66982	0.00210084	0.130759	0.827	7922	tags=30%, list=14%, signal=35%
GO_RESPONSE_TO_GLUCAGON	GO_RESPONSE_TO_GLUCAGON	Details ...	36	-0.501682	-1.66936	0.00413223	0.130283	0.829	5966	tags=31%, list=11%, signal=34%
GO_PHOSPHATIDYLGLYCEROL_METABOLIC_PROCESS	GO_PHOSPHATIDYLGLYCEROL_METABOLIC_PROCESS	Details ...	35	-0.498688	-1.66883	0.00814664	0.129881	0.829	7830	tags=37%, list=14%, signal=43%
GO_RNA_5_END_PROCESSING	GO_RNA_5_END_PROCESSING	Details ...	23	-0.624971	-1.66838	0.0308008	0.129441	0.829	7089	tags=39%, list=13%, signal=45%
GO_POTASSIUM_ION_IMPORT_ACROSS_PLASMA_MEMBRANE	GO_POTASSIUM_ION_IMPORT_ACROSS_PLASMA_MEMBRANE	Details ...	48	-0.48466	-1.66832	0.0131868	0.128642	0.829	8216	tags=35%, list=15%, signal=42%
GO_CELLULAR_BIOGENIC_AMINE_METABOLIC_PROCESS	GO_CELLULAR_BIOGENIC_AMINE_METABOLIC_PROCESS	Details ...	57	-0.480227	-1.66806	0.0101215	0.128082	0.83	12836	tags=42%, list=23%, signal=55%
GO_RENAL_SYSTEM_PROCESS	GO_RENAL_SYSTEM_PROCESS	Details ...	125	-0.42884	-1.66685	0.00436681	0.128579	0.833	6896	tags=30%, list=12%, signal=34%
GO_REGULATION_OF_CILIUM_MOVEMENT	GO_REGULATION_OF_CILIUM_MOVEMENT	Details ...	33	-0.549792	-1.66586	0.00636943	0.128801	0.834	9166	tags=48%, list=17%, signal=58%
GO_ATP_SYNTHESIS_COUPLED_ELECTRON_TRANSPORT	GO_ATP_SYNTHESIS_COUPLED_ELECTRON_TRANSPORT	Details ...	98	-0.695039	-1.66491	0.044	0.129204	0.837	9044	tags=61%, list=16%, signal=73%
GO_CELLULAR_AMINO_ACID_BIOSYNTHETIC_PROCESS	GO_CELLULAR_AMINO_ACID_BIOSYNTHETIC_PROCESS		84	-0.471788	-1.66479	0.0167364	0.128507	0.837	9252	tags=39%, list=17%, signal=47%
GO_CELLULAR_RESPONSE_TO_OXYGEN_RADICAL	GO_CELLULAR_RESPONSE_TO_OXYGEN_RADICAL		27	-0.566208	-1.66164	0.0215054	0.130853	0.839	13839	tags=63%, list=25%, signal=84%
GO_VITAMIN_D_METABOLIC_PROCESS	GO_VITAMIN_D_METABOLIC_PROCESS		22	-0.578138	-1.66062	0.0188285	0.130967	0.839	7764	tags=27%, list=14%, signal=32%
GO_ATP_SYNTHESIS_COUPLED_PROTON_TRANSPORT	GO_ATP_SYNTHESIS_COUPLED_PROTON_TRANSPORT		27	-0.762596	-1.6581	0.0245399	0.132961	0.847	9474	tags=74%, list=17%, signal=89%
GO_AEROBIC_ELECTRON_TRANSPORT_CHAIN	GO_AEROBIC_ELECTRON_TRANSPORT_CHAIN		21	-0.785676	-1.65781	0.0101833	0.132464	0.849	8030	tags=67%, list=14%, signal=78%
GO_RESPONSE_TO_XENOBIOTIC_STIMULUS	GO_RESPONSE_TO_XENOBIOTIC_STIMULUS		130	-0.441437	-1.65706	0.00626305	0.132463	0.849	9729	tags=32%, list=18%, signal=38%
GO_PROTEIN_LOCALIZATION_TO_CILIUM	GO_PROTEIN_LOCALIZATION_TO_CILIUM		61	-0.564211	-1.6565	0.0211416	0.132286	0.849	12788	tags=57%, list=23%, signal=74%
GO_REGULATION_OF_PROTEIN_KINASE_A_SIGNALING	GO_REGULATION_OF_PROTEIN_KINASE_A_SIGNALING		25	-0.52465	-1.65625	0.0122951	0.131706	0.849	4291	tags=24%, list=8%, signal=26%
GO_CELLULAR_RESPONSE_TO_COPPER_ION	GO_CELLULAR_RESPONSE_TO_COPPER_ION		28	-0.596706	-1.65432	0.0277186	0.132976	0.85	1800	tags=29%, list=3%, signal=30%
GO_NEGATIVE_REGULATION_OF_ENDOPLASMIC_RETICULUM_STRESS_INDUCED_INTRINSIC_APOPTOTIC_SIGNALING_PATHWAY	GO_NEGATIVE_REGULATION_OF_ENDOPLASMIC_RETICULUM_STRESS_INDUCED_INTRINSIC_APOPTOTIC_SIGNALING_PATHWAY		20	-0.62654	-1.65246	0.0168067	0.134107	0.851	8011	tags=50%, list=14%, signal=58%
GO_HEART_TRABECULA_MORPHOGENESIS	GO_HEART_TRABECULA_MORPHOGENESIS		34	-0.571143	-1.64848	0.0211416	0.137349	0.856	7832	tags=47%, list=14%, signal=55%
GO_RESPONSE_TO_FOOD	GO_RESPONSE_TO_FOOD		38	-0.499042	-1.64574	0.0100604	0.139632	0.859	7490	tags=24%, list=14%, signal=27%
GO_RIBOSE_PHOSPHATE_BIOSYNTHETIC_PROCESS	GO_RIBOSE_PHOSPHATE_BIOSYNTHETIC_PROCESS		194	-0.435857	-1.63994	0.0209644	0.145234	0.864	10535	tags=46%, list=19%, signal=57%
GO_NEGATIVE_REGULATION_OF_STEROID_METABOLIC_PROCESS	GO_NEGATIVE_REGULATION_OF_STEROID_METABOLIC_PROCESS		30	-0.521436	-1.63957	0.0118812	0.144867	0.865	7395	tags=30%, list=13%, signal=35%
GO_RESPONSE_TO_COPPER_ION	GO_RESPONSE_TO_COPPER_ION		43	-0.518311	-1.63924	0.0186722	0.144372	0.865	6815	tags=35%, list=12%, signal=40%
GO_PEROXISOMAL_TRANSPORT	GO_PEROXISOMAL_TRANSPORT		72	-0.524427	-1.63704	0.0289256	0.146242	0.868	8493	tags=36%, list=15%, signal=43%
GO_RESPONSE_TO_OXYGEN_RADICAL	GO_RESPONSE_TO_OXYGEN_RADICAL		30	-0.540167	-1.63649	0.0194805	0.146	0.869	12740	tags=60%, list=23%, signal=78%
GO_MITOCHONDRIAL_ELECTRON_TRANSPORT_NADH_TO_UBIQUINONE	GO_MITOCHONDRIAL_ELECTRON_TRANSPORT_NADH_TO_UBIQUINONE		55	-0.727628	-1.63359	0.0322581	0.148472	0.871	9044	tags=64%, list=16%, signal=76%
GO_REGULATION_OF_FATTY_ACID_METABOLIC_PROCESS	GO_REGULATION_OF_FATTY_ACID_METABOLIC_PROCESS		101	-0.436158	-1.63299	0.00621118	0.148338	0.871	9349	tags=31%, list=17%, signal=37%
GO_THIOESTER_BIOSYNTHETIC_PROCESS	GO_THIOESTER_BIOSYNTHETIC_PROCESS		53	-0.525455	-1.63196	0.032538	0.148532	0.871	7738	tags=51%, list=14%, signal=59%
GO_RESPONSE_TO_COLD	GO_RESPONSE_TO_COLD		48	-0.479936	-1.63145	0.0148305	0.148287	0.872	6109	tags=29%, list=11%, signal=33%
GO_MYELIN_ASSEMBLY	GO_MYELIN_ASSEMBLY		21	-0.577417	-1.63015	0.0229645	0.149175	0.874	8625	tags=43%, list=16%, signal=51%
GO_INTRA_GOLGI_VESICLE_MEDIATED_TRANSPORT	GO_INTRA_GOLGI_VESICLE_MEDIATED_TRANSPORT		34	-0.639987	-1.62815	0.0473118	0.150885	0.875	11638	tags=62%, list=21%, signal=78%
GO_HEART_FORMATION	GO_HEART_FORMATION		30	-0.534887	-1.62806	0.0128205	0.150124	0.875	12813	tags=60%, list=23%, signal=78%
GO_RNA_METHYLATION	GO_RNA_METHYLATION		84	-0.547107	-1.62804	0.0523139	0.149285	0.875	12426	tags=46%, list=22%, signal=60%
GO_SULFUR_COMPOUND_BIOSYNTHETIC_PROCESS	GO_SULFUR_COMPOUND_BIOSYNTHETIC_PROCESS		190	-0.406621	-1.62735	0.00625	0.149302	0.877	8502	tags=34%, list=15%, signal=40%
GO_CATECHOLAMINE_METABOLIC_PROCESS	GO_CATECHOLAMINE_METABOLIC_PROCESS		54	-0.465768	-1.62695	0.0105485	0.148979	0.877	6556	tags=35%, list=12%, signal=40%
GO_POSITIVE_REGULATION_OF_SMALL_MOLECULE_METABOLIC_PROCESS	GO_POSITIVE_REGULATION_OF_SMALL_MOLECULE_METABOLIC_PROCESS		153	-0.411146	-1.62568	0.00656455	0.149698	0.88	4752	tags=24%, list=9%, signal=26%
GO_SMOOTHENED_SIGNALING_PATHWAY	GO_SMOOTHENED_SIGNALING_PATHWAY		142	-0.483873	-1.62489	0.029661	0.149915	0.882	8722	tags=37%, list=16%, signal=44%
GO_THYROID_GLAND_DEVELOPMENT	GO_THYROID_GLAND_DEVELOPMENT		21	-0.557451	-1.62345	0.0152505	0.150672	0.882	8777	tags=33%, list=16%, signal=40%
GO_STEROL_HOMEOSTASIS	GO_STEROL_HOMEOSTASIS		98	-0.426671	-1.62036	0.00408998	0.15357	0.886	8716	tags=31%, list=16%, signal=36%
GO_VASCULAR_ENDOTHELIAL_GROWTH_FACTOR_SIGNALING_PATHWAY	GO_VASCULAR_ENDOTHELIAL_GROWTH_FACTOR_SIGNALING_PATHWAY		49	-0.494938	-1.61963	0.0252632	0.15365	0.887	6672	tags=31%, list=12%, signal=35%
GO_REGULATION_OF_SMOOTH_MUSCLE_CELL_DIFFERENTIATION	GO_REGULATION_OF_SMOOTH_MUSCLE_CELL_DIFFERENTIATION		41	-0.511009	-1.61901	0.0215054	0.153553	0.887	7832	tags=37%, list=14%, signal=43%
GO_REGULATION_OF_CILIUM_ASSEMBLY	GO_REGULATION_OF_CILIUM_ASSEMBLY		55	-0.492529	-1.61885	0.0189873	0.152868	0.887	9650	tags=44%, list=17%, signal=53%
GO_NEGATIVE_REGULATION_OF_FAT_CELL_DIFFERENTIATION	GO_NEGATIVE_REGULATION_OF_FAT_CELL_DIFFERENTIATION		53	-0.460325	-1.61835	0.011976	0.152567	0.888	12096	tags=47%, list=22%, signal=60%
GO_REGULATION_OF_MEMBRANE_DEPOLARIZATION	GO_REGULATION_OF_MEMBRANE_DEPOLARIZATION		48	-0.450096	-1.61523	0.00858369	0.155237	0.892	3879	tags=21%, list=7%, signal=22%
GO_GLANDULAR_EPITHELIAL_CELL_DIFFERENTIATION	GO_GLANDULAR_EPITHELIAL_CELL_DIFFERENTIATION		48	-0.483508	-1.61301	0.0294737	0.157216	0.896	7395	tags=35%, list=13%, signal=41%
GO_REGULATION_OF_POTASSIUM_ION_TRANSMEMBRANE_TRANSPORTER_ACTIVITY	GO_REGULATION_OF_POTASSIUM_ION_TRANSMEMBRANE_TRANSPORTER_ACTIVITY		63	-0.450171	-1.61248	0.0181452	0.157006	0.898	4894	tags=22%, list=9%, signal=24%
GO_POSITIVE_REGULATION_OF_CARBOHYDRATE_METABOLIC_PROCESS	GO_POSITIVE_REGULATION_OF_CARBOHYDRATE_METABOLIC_PROCESS		84	-0.449136	-1.61151	0.00860215	0.157294	0.899	4723	tags=26%, list=9%, signal=29%
GO_NEGATIVE_REGULATION_OF_FATTY_ACID_METABOLIC_PROCESS	GO_NEGATIVE_REGULATION_OF_FATTY_ACID_METABOLIC_PROCESS		35	-0.498089	-1.61096	0.012474	0.157182	0.9	9349	tags=29%, list=17%, signal=34%
GO_REGULATION_OF_MEGAKARYOCYTE_DIFFERENTIATION	GO_REGULATION_OF_MEGAKARYOCYTE_DIFFERENTIATION		80	-0.488587	-1.60859	0.0287474	0.159231	0.901	9263	tags=39%, list=17%, signal=46%
GO_GLUCOCORTICOID_METABOLIC_PROCESS	GO_GLUCOCORTICOID_METABOLIC_PROCESS		26	-0.51486	-1.6073	0.0206612	0.159942	0.903	7753	tags=31%, list=14%, signal=36%
GO_AROMATIC_AMINO_ACID_FAMILY_CATABOLIC_PROCESS	GO_AROMATIC_AMINO_ACID_FAMILY_CATABOLIC_PROCESS		28	-0.552058	-1.60322	0.0271399	0.164358	0.907	8822	tags=39%, list=16%, signal=47%
GO_NADH_DEHYDROGENASE_COMPLEX_ASSEMBLY	GO_NADH_DEHYDROGENASE_COMPLEX_ASSEMBLY		65	-0.682636	-1.6023	0.0534653	0.164757	0.909	11156	tags=66%, list=20%, signal=83%
GO_STEROL_METABOLIC_PROCESS	GO_STEROL_METABOLIC_PROCESS		169	-0.407804	-1.60227	0.0060241	0.163937	0.909	9194	tags=33%, list=17%, signal=40%
GO_NEUROTRANSMITTER_REUPTAKE	GO_NEUROTRANSMITTER_REUPTAKE		32	-0.513298	-1.60213	0.0336134	0.163291	0.909	9329	tags=41%, list=17%, signal=49%
GO_NEURON_MATURATION	GO_NEURON_MATURATION		47	-0.479324	-1.60186	0.010917	0.162791	0.909	9121	tags=38%, list=16%, signal=46%
GO_PURINE_CONTAINING_COMPOUND_CATABOLIC_PROCESS	GO_PURINE_CONTAINING_COMPOUND_CATABOLIC_PROCESS		51	-0.443502	-1.60098	0.0117188	0.163096	0.911	6700	tags=37%, list=12%, signal=42%
GO_REGULATION_OF_GLUCOSE_METABOLIC_PROCESS	GO_REGULATION_OF_GLUCOSE_METABOLIC_PROCESS		121	-0.411397	-1.59645	0.0100806	0.167543	0.914	8708	tags=31%, list=16%, signal=36%
GO_VENTRICULAR_CARDIAC_MUSCLE_CELL_MEMBRANE_REPOLARIZATION	GO_VENTRICULAR_CARDIAC_MUSCLE_CELL_MEMBRANE_REPOLARIZATION		27	-0.541467	-1.59631	0.00879121	0.166936	0.914	6471	tags=37%, list=12%, signal=42%
GO_RNA_MODIFICATION	GO_RNA_MODIFICATION		168	-0.479965	-1.59396	0.0478088	0.169089	0.916	11461	tags=40%, list=21%, signal=50%
GO_MELANOCYTE_DIFFERENTIATION	GO_MELANOCYTE_DIFFERENTIATION		26	-0.51954	-1.59179	0.0229167	0.17103	0.918	7272	tags=35%, list=13%, signal=40%
GO_PROTEIN_KINASE_A_SIGNALING	GO_PROTEIN_KINASE_A_SIGNALING		39	-0.471432	-1.59092	0.00609756	0.171287	0.918	4291	tags=21%, list=8%, signal=22%
GO_PROTEIN_MANNOSYLATION	GO_PROTEIN_MANNOSYLATION		24	-0.579937	-1.59065	0.0356394	0.170827	0.919	9633	tags=50%, list=17%, signal=60%
GO_ACTION_POTENTIAL	GO_ACTION_POTENTIAL		135	-0.399144	-1.58887	0.0166667	0.172315	0.921	8498	tags=32%, list=15%, signal=38%
GO_PEPTIDYL_ASPARAGINE_MODIFICATION	GO_PEPTIDYL_ASPARAGINE_MODIFICATION		31	-0.576868	-1.58872	0.0514851	0.171686	0.921	10477	tags=55%, list=19%, signal=68%
GO_REGULATION_OF_EXCRETION	GO_REGULATION_OF_EXCRETION		24	-0.527648	-1.58867	0.0382166	0.170933	0.921	6896	tags=38%, list=12%, signal=43%
GO_REGULATION_OF_PH	GO_REGULATION_OF_PH		103	-0.427817	-1.58864	0.0210526	0.170153	0.921	6264	tags=26%, list=11%, signal=29%
GO_POLYOL_CATABOLIC_PROCESS	GO_POLYOL_CATABOLIC_PROCESS		26	-0.562078	-1.58857	0.031185	0.169452	0.921	6815	tags=38%, list=12%, signal=44%
GO_REGULATION_OF_MULTICELLULAR_ORGANISM_GROWTH	GO_REGULATION_OF_MULTICELLULAR_ORGANISM_GROWTH		68	-0.446118	-1.58759	0.0146138	0.16987	0.922	4540	tags=26%, list=8%, signal=29%
GO_TRNA_PROCESSING	GO_TRNA_PROCESSING		130	-0.516595	-1.58662	0.05	0.170328	0.923	11235	tags=45%, list=20%, signal=56%
GO_IRE1_MEDIATED_UNFOLDED_PROTEIN_RESPONSE	GO_IRE1_MEDIATED_UNFOLDED_PROTEIN_RESPONSE		67	-0.501112	-1.58645	0.0610236	0.16973	0.923	6076	tags=34%, list=11%, signal=39%
GO_PEPTIDYL_GLUTAMIC_ACID_MODIFICATION	GO_PEPTIDYL_GLUTAMIC_ACID_MODIFICATION		31	-0.500043	-1.58581	0.028169	0.169768	0.924	11975	tags=35%, list=22%, signal=45%
GO_CELLULAR_ALDEHYDE_METABOLIC_PROCESS	GO_CELLULAR_ALDEHYDE_METABOLIC_PROCESS		63	-0.488744	-1.57948	0.0470348	0.176781	0.927	7395	tags=35%, list=13%, signal=40%
GO_SPINAL_CORD_PATTERNING	GO_SPINAL_CORD_PATTERNING		24	-0.552292	-1.57874	0.0321199	0.176922	0.927	7026	tags=38%, list=13%, signal=43%
GO_BROWN_FAT_CELL_DIFFERENTIATION	GO_BROWN_FAT_CELL_DIFFERENTIATION		50	-0.473798	-1.57833	0.037037	0.176592	0.927	4669	tags=30%, list=8%, signal=33%
GO_RENAL_WATER_HOMEOSTASIS	GO_RENAL_WATER_HOMEOSTASIS		37	-0.487165	-1.5776	0.0232068	0.17672	0.929	5966	tags=27%, list=11%, signal=30%
GO_REGULATION_OF_CARDIAC_MUSCLE_CONTRACTION_BY_CALCIUM_ION_SIGNALING	GO_REGULATION_OF_CARDIAC_MUSCLE_CONTRACTION_BY_CALCIUM_ION_SIGNALING		26	-0.532696	-1.57694	0.0239651	0.176706	0.929	10239	tags=50%, list=18%, signal=61%
GO_REGULATION_OF_CELLULAR_CARBOHYDRATE_METABOLIC_PROCESS	GO_REGULATION_OF_CELLULAR_CARBOHYDRATE_METABOLIC_PROCESS		148	-0.39361	-1.5759	0.0144628	0.177109	0.929	6625	tags=26%, list=12%, signal=30%
GO_NEGATIVE_REGULATION_OF_SMOOTH_MUSCLE_CELL_PROLIFERATION	GO_NEGATIVE_REGULATION_OF_SMOOTH_MUSCLE_CELL_PROLIFERATION		58	-0.451697	-1.5757	0.0229645	0.176563	0.929	12412	tags=33%, list=22%, signal=42%
GO_PYRIDINE_CONTAINING_COMPOUND_METABOLIC_PROCESS	GO_PYRIDINE_CONTAINING_COMPOUND_METABOLIC_PROCESS		41	-0.469326	-1.57563	0.029661	0.175856	0.93	6172	tags=32%, list=11%, signal=36%
GO_NEGATIVE_REGULATION_OF_COLD_INDUCED_THERMOGENESIS	GO_NEGATIVE_REGULATION_OF_COLD_INDUCED_THERMOGENESIS		47	-0.473594	-1.57292	0.039749	0.178401	0.931	4641	tags=26%, list=8%, signal=28%
GO_FATTY_ACYL_COA_METABOLIC_PROCESS	GO_FATTY_ACYL_COA_METABOLIC_PROCESS		41	-0.469171	-1.57278	0.0328947	0.177795	0.931	7738	tags=49%, list=14%, signal=57%
GO_TRICARBOXYLIC_ACID_CYCLE	GO_TRICARBOXYLIC_ACID_CYCLE		34	-0.677497	-1.5712	0.0866935	0.179236	0.933	11091	tags=71%, list=20%, signal=88%
GO_RESPONSE_TO_ZINC_ION	GO_RESPONSE_TO_ZINC_ION		54	-0.468597	-1.57008	0.0299786	0.179737	0.934	9007	tags=37%, list=16%, signal=44%
GO_CELLULAR_RESPONSE_TO_CADMIUM_ION	GO_CELLULAR_RESPONSE_TO_CADMIUM_ION		38	-0.49671	-1.56982	0.0387931	0.179267	0.934	3725	tags=26%, list=7%, signal=28%
GO_FATTY_ACID_TRANSMEMBRANE_TRANSPORT	GO_FATTY_ACID_TRANSMEMBRANE_TRANSPORT		23	-0.514574	-1.56929	0.0375	0.179174	0.934	9349	tags=48%, list=17%, signal=57%
GO_MONOVALENT_INORGANIC_CATION_HOMEOSTASIS	GO_MONOVALENT_INORGANIC_CATION_HOMEOSTASIS		159	-0.391136	-1.56825	0.0147059	0.179756	0.934	6264	tags=24%, list=11%, signal=27%
GO_NEURAL_TUBE_PATTERNING	GO_NEURAL_TUBE_PATTERNING		41	-0.503971	-1.56695	0.0490405	0.180763	0.934	5551	tags=32%, list=10%, signal=35%
GO_GLOMERULUS_DEVELOPMENT	GO_GLOMERULUS_DEVELOPMENT		64	-0.497627	-1.56649	0.0521739	0.180606	0.934	7560	tags=38%, list=14%, signal=43%
GO_FATTY_ACYL_COA_BIOSYNTHETIC_PROCESS	GO_FATTY_ACYL_COA_BIOSYNTHETIC_PROCESS		32	-0.482627	-1.5662	0.0295983	0.180172	0.934	7738	tags=50%, list=14%, signal=58%
GO_REGULATION_OF_GLUCONEOGENESIS	GO_REGULATION_OF_GLUCONEOGENESIS		49	-0.45861	-1.56542	0.0233918	0.180459	0.935	6625	tags=27%, list=12%, signal=30%
GO_INORGANIC_ANION_TRANSPORT	GO_INORGANIC_ANION_TRANSPORT		172	-0.38	-1.56439	0.00419287	0.180955	0.936	8429	tags=28%, list=15%, signal=33%
GO_MEGAKARYOCYTE_DIFFERENTIATION	GO_MEGAKARYOCYTE_DIFFERENTIATION		98	-0.456589	-1.56435	0.0330578	0.18021	0.936	9313	tags=38%, list=17%, signal=45%
GO_ANIMAL_ORGAN_FORMATION	GO_ANIMAL_ORGAN_FORMATION		64	-0.46666	-1.56424	0.0215054	0.179549	0.936	12813	tags=42%, list=23%, signal=55%
GO_REGULATION_OF_MEIOTIC_CELL_CYCLE	GO_REGULATION_OF_MEIOTIC_CELL_CYCLE		52	-0.450436	-1.56374	0.0327869	0.179488	0.936	11159	tags=40%, list=20%, signal=51%
GO_BRAIN_MORPHOGENESIS	GO_BRAIN_MORPHOGENESIS		34	-0.551489	-1.56314	0.0375783	0.179493	0.936	10758	tags=50%, list=19%, signal=62%
GO_DNA_CATABOLIC_PROCESS	GO_DNA_CATABOLIC_PROCESS		42	-0.473704	-1.56229	0.029106	0.179822	0.936	10669	tags=40%, list=19%, signal=50%
GO_PROTEIN_TETRAMERIZATION	GO_PROTEIN_TETRAMERIZATION		87	-0.412997	-1.56184	0.0183299	0.179617	0.936	8690	tags=30%, list=16%, signal=35%
GO_POSITIVE_REGULATION_OF_FATTY_ACID_METABOLIC_PROCESS	GO_POSITIVE_REGULATION_OF_FATTY_ACID_METABOLIC_PROCESS		38	-0.475856	-1.56173	0.025	0.178991	0.936	7753	tags=37%, list=14%, signal=43%
GO_DICARBOXYLIC_ACID_METABOLIC_PROCESS	GO_DICARBOXYLIC_ACID_METABOLIC_PROCESS		97	-0.463396	-1.56157	0.0440882	0.178476	0.936	10362	tags=46%, list=19%, signal=57%
GO_PHOTORECEPTOR_CELL_DIFFERENTIATION	GO_PHOTORECEPTOR_CELL_DIFFERENTIATION		63	-0.469105	-1.56024	0.026087	0.179507	0.937	9113	tags=29%, list=16%, signal=34%
GO_NUCLEOSIDE_BISPHOSPHATE_BIOSYNTHETIC_PROCESS	GO_NUCLEOSIDE_BISPHOSPHATE_BIOSYNTHETIC_PROCESS		67	-0.481044	-1.55989	0.0437637	0.17918	0.937	7738	tags=48%, list=14%, signal=55%
GO_CELLULAR_GLUCAN_METABOLIC_PROCESS	GO_CELLULAR_GLUCAN_METABOLIC_PROCESS		74	-0.437579	-1.55958	0.0225873	0.178787	0.937	9349	tags=36%, list=17%, signal=44%
GO_ORGANOPHOSPHATE_ESTER_TRANSPORT	GO_ORGANOPHOSPHATE_ESTER_TRANSPORT		135	-0.410421	-1.55958	0.017316	0.178058	0.937	7753	tags=30%, list=14%, signal=34%
GO_REGULATION_OF_STEROID_BIOSYNTHETIC_PROCESS	GO_REGULATION_OF_STEROID_BIOSYNTHETIC_PROCESS		98	-0.43376	-1.55667	0.0221774	0.180928	0.94	8906	tags=31%, list=16%, signal=36%
GO_POSITIVE_REGULATION_OF_TRANSLATIONAL_INITIATION	GO_POSITIVE_REGULATION_OF_TRANSLATIONAL_INITIATION		31	-0.561782	-1.55526	0.0504202	0.182023	0.942	12510	tags=48%, list=23%, signal=62%
GO_CELLULAR_CARBOHYDRATE_CATABOLIC_PROCESS	GO_CELLULAR_CARBOHYDRATE_CATABOLIC_PROCESS		46	-0.46719	-1.5546	0.0329897	0.182166	0.942	8708	tags=39%, list=16%, signal=46%
GO_EMBRYONIC_HEART_TUBE_MORPHOGENESIS	GO_EMBRYONIC_HEART_TUBE_MORPHOGENESIS		70	-0.463301	-1.55397	0.0293501	0.182202	0.943	10350	tags=40%, list=19%, signal=49%
GO_NUCLEOSIDE_PHOSPHATE_CATABOLIC_PROCESS	GO_NUCLEOSIDE_PHOSPHATE_CATABOLIC_PROCESS		73	-0.415823	-1.55394	0.00814664	0.181509	0.943	6700	tags=37%, list=12%, signal=42%
GO_ATP_BIOSYNTHETIC_PROCESS	GO_ATP_BIOSYNTHETIC_PROCESS		54	-0.533388	-1.55286	0.0651261	0.182097	0.943	9898	tags=54%, list=18%, signal=65%
GO_CELLULAR_RESPONSE_TO_STEROL	GO_CELLULAR_RESPONSE_TO_STEROL		26	-0.542801	-1.5525	0.0392562	0.181865	0.943	8716	tags=42%, list=16%, signal=50%
GO_MITOCHONDRIAL_MEMBRANE_ORGANIZATION	GO_MITOCHONDRIAL_MEMBRANE_ORGANIZATION		137	-0.460389	-1.5521	0.0503145	0.181688	0.944	8873	tags=42%, list=16%, signal=50%
GO_ORGANOPHOSPHATE_CATABOLIC_PROCESS	GO_ORGANOPHOSPHATE_CATABOLIC_PROCESS		144	-0.389827	-1.55114	0.00621118	0.18205	0.944	6700	tags=29%, list=12%, signal=33%
GO_POSITIVE_REGULATION_OF_GLUCOSE_METABOLIC_PROCESS	GO_POSITIVE_REGULATION_OF_GLUCOSE_METABOLIC_PROCESS		42	-0.474861	-1.54929	0.0219561	0.183866	0.945	4723	tags=26%, list=9%, signal=29%
GO_CGMP_MEDIATED_SIGNALING	GO_CGMP_MEDIATED_SIGNALING		30	-0.50627	-1.54847	0.0458333	0.184101	0.946	2102	tags=27%, list=4%, signal=28%
GO_DICARBOXYLIC_ACID_TRANSPORT	GO_DICARBOXYLIC_ACID_TRANSPORT		98	-0.412767	-1.54782	0.0237581	0.184208	0.947	10226	tags=38%, list=18%, signal=46%
GO_TRNA_METABOLIC_PROCESS	GO_TRNA_METABOLIC_PROCESS		186	-0.482022	-1.54699	0.0647773	0.184449	0.948	11643	tags=44%, list=21%, signal=55%
GO_NEGATIVE_REGULATION_OF_RESPONSE_TO_ENDOPLASMIC_RETICULUM_STRESS	GO_NEGATIVE_REGULATION_OF_RESPONSE_TO_ENDOPLASMIC_RETICULUM_STRESS		51	-0.498729	-1.54688	0.043299	0.18387	0.949	9951	tags=47%, list=18%, signal=57%
GO_DNA_CATABOLIC_PROCESS_ENDONUCLEOLYTIC	GO_DNA_CATABOLIC_PROCESS_ENDONUCLEOLYTIC		33	-0.482799	-1.54536	0.0381356	0.185102	0.95	10669	tags=39%, list=19%, signal=49%
GO_RETINA_MORPHOGENESIS_IN_CAMERA_TYPE_EYE	GO_RETINA_MORPHOGENESIS_IN_CAMERA_TYPE_EYE		60	-0.466972	-1.54465	0.0225225	0.185276	0.95	8109	tags=30%, list=15%, signal=35%
GO_CELL_CELL_ADHESION_MEDIATED_BY_CADHERIN	GO_CELL_CELL_ADHESION_MEDIATED_BY_CADHERIN		28	-0.516394	-1.54411	0.0327198	0.18516	0.95	4641	tags=32%, list=8%, signal=35%
GO_LIPOPROTEIN_BIOSYNTHETIC_PROCESS	GO_LIPOPROTEIN_BIOSYNTHETIC_PROCESS		98	-0.448599	-1.54349	0.0521042	0.185293	0.951	9841	tags=38%, list=18%, signal=46%
GO_CARDIAC_MUSCLE_CELL_MEMBRANE_REPOLARIZATION	GO_CARDIAC_MUSCLE_CELL_MEMBRANE_REPOLARIZATION		38	-0.469604	-1.54349	0.0336842	0.184601	0.951	4882	tags=32%, list=9%, signal=35%
GO_FATTY_ACID_DERIVATIVE_BIOSYNTHETIC_PROCESS	GO_FATTY_ACID_DERIVATIVE_BIOSYNTHETIC_PROCESS		103	-0.386414	-1.54173	0.017094	0.186116	0.952	8580	tags=33%, list=15%, signal=39%
GO_REGULATION_OF_HEART_RATE	GO_REGULATION_OF_HEART_RATE		103	-0.402929	-1.54043	0.0191083	0.187116	0.952	10836	tags=38%, list=20%, signal=47%
GO_CEREBRAL_CORTEX_NEURON_DIFFERENTIATION	GO_CEREBRAL_CORTEX_NEURON_DIFFERENTIATION		25	-0.510555	-1.53828	0.0434783	0.189266	0.953	9990	tags=44%, list=18%, signal=54%
GO_REGULATION_OF_DELAYED_RECTIFIER_POTASSIUM_CHANNEL_ACTIVITY	GO_REGULATION_OF_DELAYED_RECTIFIER_POTASSIUM_CHANNEL_ACTIVITY		20	-0.52377	-1.53779	0.0327869	0.189188	0.953	11822	tags=45%, list=21%, signal=57%
GO_NEGATIVE_REGULATION_OF_LIPID_METABOLIC_PROCESS	GO_NEGATIVE_REGULATION_OF_LIPID_METABOLIC_PROCESS		98	-0.392139	-1.53673	0.0179641	0.189892	0.954	9349	tags=24%, list=17%, signal=29%
GO_MICROTUBULE_BASED_TRANSPORT	GO_MICROTUBULE_BASED_TRANSPORT		190	-0.441344	-1.5366	0.048218	0.189359	0.954	8434	tags=36%, list=15%, signal=42%
GO_TRANSMISSION_OF_NERVE_IMPULSE	GO_TRANSMISSION_OF_NERVE_IMPULSE		72	-0.409194	-1.53617	0.010661	0.189219	0.954	9485	tags=33%, list=17%, signal=40%
GO_NEGATIVE_REGULATION_OF_ORGAN_GROWTH	GO_NEGATIVE_REGULATION_OF_ORGAN_GROWTH		41	-0.468137	-1.53321	0.039916	0.192258	0.956	14157	tags=39%, list=26%, signal=52%
GO_REGULATION_OF_CELLULAR_PH	GO_REGULATION_OF_CELLULAR_PH		94	-0.416504	-1.53149	0.0400844	0.193829	0.958	6264	tags=27%, list=11%, signal=30%
GO_SCHWANN_CELL_DEVELOPMENT	GO_SCHWANN_CELL_DEVELOPMENT		31	-0.509219	-1.52867	0.0596708	0.196717	0.959	11504	tags=52%, list=21%, signal=65%
GO_REGULATION_OF_CELL_CELL_ADHESION_MEDIATED_BY_CADHERIN	GO_REGULATION_OF_CELL_CELL_ADHESION_MEDIATED_BY_CADHERIN		21	-0.522536	-1.52729	0.033543	0.197835	0.96	4641	tags=38%, list=8%, signal=42%
GO_EXCRETION	GO_EXCRETION		65	-0.414251	-1.52648	0.0209644	0.198245	0.96	6930	tags=26%, list=12%, signal=30%
GO_CARDIAC_MUSCLE_CELL_CONTRACTION	GO_CARDIAC_MUSCLE_CELL_CONTRACTION		71	-0.425865	-1.52563	0.0248447	0.198656	0.96	10836	tags=45%, list=20%, signal=56%
GO_REGULATION_OF_MEIOTIC_NUCLEAR_DIVISION	GO_REGULATION_OF_MEIOTIC_NUCLEAR_DIVISION		33	-0.46992	-1.52463	0.0346939	0.199302	0.96	9916	tags=39%, list=18%, signal=48%
GO_CHLORIDE_TRANSPORT	GO_CHLORIDE_TRANSPORT		111	-0.391421	-1.52445	0.0126582	0.198823	0.96	6623	tags=26%, list=12%, signal=30%
GO_PYRIDINE_CONTAINING_COMPOUND_BIOSYNTHETIC_PROCESS	GO_PYRIDINE_CONTAINING_COMPOUND_BIOSYNTHETIC_PROCESS		35	-0.471529	-1.52402	0.0483193	0.198674	0.96	5613	tags=29%, list=10%, signal=32%
GO_CELL_FATE_DETERMINATION	GO_CELL_FATE_DETERMINATION		42	-0.470261	-1.52269	0.0360169	0.199701	0.96	6672	tags=31%, list=12%, signal=35%
GO_TRIGLYCERIDE_BIOSYNTHETIC_PROCESS	GO_TRIGLYCERIDE_BIOSYNTHETIC_PROCESS		41	-0.44893	-1.52258	0.0336134	0.199126	0.96	7554	tags=34%, list=14%, signal=39%
GO_CARDIAC_MUSCLE_CELL_ACTION_POTENTIAL_INVOLVED_IN_CONTRACTION	GO_CARDIAC_MUSCLE_CELL_ACTION_POTENTIAL_INVOLVED_IN_CONTRACTION		53	-0.4394	-1.52152	0.0338266	0.199757	0.961	5902	tags=34%, list=11%, signal=38%
GO_CARDIAC_MUSCLE_CELL_ACTION_POTENTIAL	GO_CARDIAC_MUSCLE_CELL_ACTION_POTENTIAL		72	-0.423516	-1.5214	0.0313808	0.199188	0.961	5902	tags=31%, list=11%, signal=34%
GO_REGULATION_OF_CARDIAC_MUSCLE_CELL_MEMBRANE_REPOLARIZATION	GO_REGULATION_OF_CARDIAC_MUSCLE_CELL_MEMBRANE_REPOLARIZATION		28	-0.483129	-1.52049	0.0311203	0.199828	0.962	6471	tags=36%, list=12%, signal=40%
GO_PHOTOPERIODISM	GO_PHOTOPERIODISM		33	-0.482791	-1.51839	0.044898	0.201929	0.964	7806	tags=36%, list=14%, signal=42%
GO_POSITIVE_REGULATION_OF_ATP_METABOLIC_PROCESS	GO_POSITIVE_REGULATION_OF_ATP_METABOLIC_PROCESS		50	-0.43398	-1.51501	0.0254777	0.205429	0.966	3750	tags=22%, list=7%, signal=24%
GO_SYNAPTIC_VESICLE_PRIMING	GO_SYNAPTIC_VESICLE_PRIMING		20	-0.539489	-1.51368	0.0539419	0.206491	0.969	6532	tags=45%, list=12%, signal=51%
GO_CELLULAR_MONOVALENT_INORGANIC_CATION_HOMEOSTASIS	GO_CELLULAR_MONOVALENT_INORGANIC_CATION_HOMEOSTASIS		114	-0.396025	-1.51346	0.0269151	0.206049	0.969	6264	tags=25%, list=11%, signal=29%
GO_GLYCOGEN_BIOSYNTHETIC_PROCESS	GO_GLYCOGEN_BIOSYNTHETIC_PROCESS		46	-0.452344	-1.51278	0.0260521	0.206204	0.97	9349	tags=39%, list=17%, signal=47%
GO_ERAD_PATHWAY	GO_ERAD_PATHWAY		99	-0.467609	-1.51179	0.0801603	0.2068	0.97	9361	tags=37%, list=17%, signal=45%
GO_BENZENE_CONTAINING_COMPOUND_METABOLIC_PROCESS	GO_BENZENE_CONTAINING_COMPOUND_METABOLIC_PROCESS		25	-0.508799	-1.50974	0.0406852	0.20891	0.971	7891	tags=32%, list=14%, signal=37%
GO_C4_DICARBOXYLATE_TRANSPORT	GO_C4_DICARBOXYLATE_TRANSPORT		25	-0.503824	-1.5093	0.0478088	0.208763	0.971	7906	tags=48%, list=14%, signal=56%
GO_EMBRYONIC_HEART_TUBE_DEVELOPMENT	GO_EMBRYONIC_HEART_TUBE_DEVELOPMENT		80	-0.448685	-1.50752	0.04	0.210407	0.971	12223	tags=43%, list=22%, signal=54%
GO_CELLULAR_COMPONENT_DISASSEMBLY_INVOLVED_IN_EXECUTION_PHASE_OF_APOPTOSIS	GO_CELLULAR_COMPONENT_DISASSEMBLY_INVOLVED_IN_EXECUTION_PHASE_OF_APOPTOSIS		36	-0.461456	-1.50503	0.0349076	0.213075	0.971	10669	tags=36%, list=19%, signal=45%
GO_MITOCHONDRIAL_FUSION	GO_MITOCHONDRIAL_FUSION		27	-0.534626	-1.50485	0.0880503	0.212572	0.971	12744	tags=59%, list=23%, signal=77%
GO_FAT_SOLUBLE_VITAMIN_METABOLIC_PROCESS	GO_FAT_SOLUBLE_VITAMIN_METABOLIC_PROCESS		45	-0.47359	-1.50398	0.0346939	0.213049	0.971	9763	tags=27%, list=18%, signal=32%
GO_NEGATIVE_REGULATION_OF_CARDIAC_MUSCLE_TISSUE_DEVELOPMENT	GO_NEGATIVE_REGULATION_OF_CARDIAC_MUSCLE_TISSUE_DEVELOPMENT		44	-0.453658	-1.50358	0.0622407	0.212837	0.971	11079	tags=34%, list=20%, signal=43%
GO_C21_STEROID_HORMONE_METABOLIC_PROCESS	GO_C21_STEROID_HORMONE_METABOLIC_PROCESS		40	-0.482999	-1.50225	0.0349794	0.213982	0.971	9497	tags=30%, list=17%, signal=36%
GO_CELLULAR_RESPONSE_TO_CHOLESTEROL	GO_CELLULAR_RESPONSE_TO_CHOLESTEROL		21	-0.5459	-1.50126	0.0584677	0.214782	0.971	8716	tags=43%, list=16%, signal=51%
GO_MITOCHONDRIAL_TRANSLATION	GO_MITOCHONDRIAL_TRANSLATION		135	-0.560299	-1.50104	0.0985916	0.214377	0.972	9339	tags=45%, list=17%, signal=54%
GO_NEGATIVE_REGULATION_OF_VASCULAR_ENDOTHELIAL_CELL_PROLIFERATION	GO_NEGATIVE_REGULATION_OF_VASCULAR_ENDOTHELIAL_CELL_PROLIFERATION		21	-0.532275	-1.50081	0.0662393	0.213946	0.972	18113	tags=43%, list=33%, signal=64%
GO_RIBONUCLEOSIDE_TRIPHOSPHATE_BIOSYNTHETIC_PROCESS	GO_RIBONUCLEOSIDE_TRIPHOSPHATE_BIOSYNTHETIC_PROCESS		71	-0.481342	-1.50069	0.0841889	0.213375	0.972	9898	tags=46%, list=18%, signal=57%
GO_NEGATIVE_REGULATION_OF_HORMONE_SECRETION	GO_NEGATIVE_REGULATION_OF_HORMONE_SECRETION		61	-0.410206	-1.50052	0.0352941	0.212901	0.972	8417	tags=28%, list=15%, signal=33%
GO_NEGATIVE_REGULATION_OF_SPROUTING_ANGIOGENESIS	GO_NEGATIVE_REGULATION_OF_SPROUTING_ANGIOGENESIS		65	-0.407623	-1.50046	0.0501044	0.212275	0.972	5606	tags=17%, list=10%, signal=19%
GO_REGULATION_OF_BLOOD_PRESSURE	GO_REGULATION_OF_BLOOD_PRESSURE		186	-0.388153	-1.49991	0.027897	0.212245	0.973	7784	tags=27%, list=14%, signal=31%
GO_RESPONSE_TO_ACTIVITY	GO_RESPONSE_TO_ACTIVITY		70	-0.419526	-1.49972	0.0383838	0.211836	0.973	11022	tags=37%, list=20%, signal=46%
GO_NEPHRON_EPITHELIUM_DEVELOPMENT	GO_NEPHRON_EPITHELIUM_DEVELOPMENT		110	-0.418282	-1.49957	0.0309917	0.211321	0.973	7719	tags=31%, list=14%, signal=36%
GO_MITOCHONDRIAL_GENOME_MAINTENANCE	GO_MITOCHONDRIAL_GENOME_MAINTENANCE		23	-0.534474	-1.49742	0.06639	0.213573	0.973	8965	tags=43%, list=16%, signal=52%
GO_REGULATION_OF_GENERATION_OF_PRECURSOR_METABOLITES_AND_ENERGY	GO_REGULATION_OF_GENERATION_OF_PRECURSOR_METABOLITES_AND_ENERGY		162	-0.39504	-1.49519	0.0430328	0.215862	0.974	9474	tags=30%, list=17%, signal=36%
GO_RENAL_SODIUM_EXCRETION	GO_RENAL_SODIUM_EXCRETION		23	-0.497284	-1.4926	0.0706638	0.218669	0.975	5847	tags=30%, list=11%, signal=34%
GO_REGULATION_OF_FERTILIZATION	GO_REGULATION_OF_FERTILIZATION		29	-0.46064	-1.492	0.029106	0.218776	0.975	8425	tags=34%, list=15%, signal=41%
GO_MECHANORECEPTOR_DIFFERENTIATION	GO_MECHANORECEPTOR_DIFFERENTIATION		66	-0.41061	-1.49099	0.0248447	0.219327	0.976	8134	tags=35%, list=15%, signal=41%
GO_RENAL_TUBULE_DEVELOPMENT	GO_RENAL_TUBULE_DEVELOPMENT		95	-0.421039	-1.49027	0.0348361	0.219561	0.976	7719	tags=29%, list=14%, signal=34%
GO_REGULATION_OF_VASCULAR_ASSOCIATED_SMOOTH_MUSCLE_CELL_DIFFERENTIATION	GO_REGULATION_OF_VASCULAR_ASSOCIATED_SMOOTH_MUSCLE_CELL_DIFFERENTIATION		24	-0.507673	-1.49024	0.0560345	0.218911	0.976	7832	tags=33%, list=14%, signal=39%
GO_NEGATIVE_REGULATION_OF_OSTEOBLAST_DIFFERENTIATION	GO_NEGATIVE_REGULATION_OF_OSTEOBLAST_DIFFERENTIATION		49	-0.473546	-1.48954	0.0491071	0.219148	0.976	15760	tags=57%, list=28%, signal=80%
GO_ENDOPLASMIC_RETICULUM_UNFOLDED_PROTEIN_RESPONSE	GO_ENDOPLASMIC_RETICULUM_UNFOLDED_PROTEIN_RESPONSE		125	-0.44468	-1.48805	0.0764588	0.220639	0.977	9375	tags=34%, list=17%, signal=41%
GO_RESPONSE_TO_AUDITORY_STIMULUS	GO_RESPONSE_TO_AUDITORY_STIMULUS		27	-0.448164	-1.4873	0.0212314	0.220936	0.978	2495	tags=22%, list=4%, signal=23%
GO_ORGANIC_ACID_TRANSMEMBRANE_TRANSPORT	GO_ORGANIC_ACID_TRANSMEMBRANE_TRANSPORT		151	-0.377689	-1.48617	0.0311203	0.221655	0.978	10539	tags=35%, list=19%, signal=43%
GO_NEGATIVE_REGULATION_OF_CARDIAC_MUSCLE_CELL_PROLIFERATION	GO_NEGATIVE_REGULATION_OF_CARDIAC_MUSCLE_CELL_PROLIFERATION		22	-0.503662	-1.48551	0.0519751	0.221837	0.979	14157	tags=36%, list=26%, signal=49%
GO_GLUTAMATE_METABOLIC_PROCESS	GO_GLUTAMATE_METABOLIC_PROCESS		33	-0.496317	-1.48545	0.0559006	0.221235	0.979	8523	tags=42%, list=15%, signal=50%
GO_REGULATION_OF_CHOLESTEROL_METABOLIC_PROCESS	GO_REGULATION_OF_CHOLESTEROL_METABOLIC_PROCESS		65	-0.432621	-1.48538	0.036	0.220688	0.979	8906	tags=34%, list=16%, signal=40%
GO_ORGANIC_CATION_TRANSPORT	GO_ORGANIC_CATION_TRANSPORT		49	-0.437261	-1.48533	0.0369565	0.22008	0.979	4314	tags=20%, list=8%, signal=22%
GO_REGULATION_OF_POSITIVE_CHEMOTAXIS	GO_REGULATION_OF_POSITIVE_CHEMOTAXIS		26	-0.487722	-1.4852	0.0390144	0.219572	0.979	3427	tags=23%, list=6%, signal=25%
GO_NEGATIVE_REGULATION_OF_CARDIAC_MUSCLE_TISSUE_GROWTH	GO_NEGATIVE_REGULATION_OF_CARDIAC_MUSCLE_TISSUE_GROWTH		33	-0.460476	-1.48511	0.0484211	0.219008	0.979	14157	tags=39%, list=26%, signal=53%
GO_GOLGI_ORGANIZATION	GO_GOLGI_ORGANIZATION		150	-0.469267	-1.48461	0.0983936	0.218953	0.979	10796	tags=46%, list=19%, signal=57%
GO_SPERM_CAPACITATION	GO_SPERM_CAPACITATION		29	-0.490298	-1.48445	0.0283401	0.218491	0.979	4495	tags=24%, list=8%, signal=26%
GO_PIGMENT_CELL_DIFFERENTIATION	GO_PIGMENT_CELL_DIFFERENTIATION		36	-0.45209	-1.48392	0.0587045	0.218527	0.979	7272	tags=31%, list=13%, signal=35%
GO_REGULATION_OF_POTASSIUM_ION_TRANSPORT	GO_REGULATION_OF_POTASSIUM_ION_TRANSPORT		103	-0.386255	-1.48217	0.0189076	0.219974	0.979	11095	tags=34%, list=20%, signal=42%
GO_REGULATION_OF_CAMP_MEDIATED_SIGNALING	GO_REGULATION_OF_CAMP_MEDIATED_SIGNALING		51	-0.423101	-1.48177	0.0295983	0.219889	0.979	5278	tags=25%, list=10%, signal=28%
GO_INTRACELLULAR_LIPID_TRANSPORT	GO_INTRACELLULAR_LIPID_TRANSPORT		44	-0.4733	-1.48063	0.0453564	0.220758	0.979	5651	tags=34%, list=10%, signal=38%
GO_NUCLEOSIDE_DIPHOSPHATE_METABOLIC_PROCESS	GO_NUCLEOSIDE_DIPHOSPHATE_METABOLIC_PROCESS		155	-0.393963	-1.48048	0.0481172	0.220298	0.979	7884	tags=28%, list=14%, signal=32%
GO_INORGANIC_ANION_TRANSMEMBRANE_TRANSPORT	GO_INORGANIC_ANION_TRANSMEMBRANE_TRANSPORT		121	-0.378304	-1.4796	0.0280172	0.220686	0.979	8727	tags=30%, list=16%, signal=35%
GO_NEPHRON_DEVELOPMENT	GO_NEPHRON_DEVELOPMENT		143	-0.405166	-1.47906	0.0426829	0.220753	0.979	7719	tags=31%, list=14%, signal=36%
GO_GLYCEROL_ETHER_METABOLIC_PROCESS	GO_GLYCEROL_ETHER_METABOLIC_PROCESS		21	-0.474749	-1.47831	0.0560166	0.22118	0.979	7527	tags=43%, list=14%, signal=50%
GO_VACUOLAR_ACIDIFICATION	GO_VACUOLAR_ACIDIFICATION		23	-0.531232	-1.47744	0.0707071	0.221715	0.98	7383	tags=43%, list=13%, signal=50%
GO_DEVELOPMENTAL_PIGMENTATION	GO_DEVELOPMENTAL_PIGMENTATION		46	-0.443247	-1.47729	0.057732	0.221255	0.98	7272	tags=30%, list=13%, signal=35%
GO_ENTRAINMENT_OF_CIRCADIAN_CLOCK	GO_ENTRAINMENT_OF_CIRCADIAN_CLOCK		34	-0.478509	-1.47549	0.0559006	0.22301	0.98	7806	tags=35%, list=14%, signal=41%
GO_VERY_LONG_CHAIN_FATTY_ACID_METABOLIC_PROCESS	GO_VERY_LONG_CHAIN_FATTY_ACID_METABOLIC_PROCESS		34	-0.452478	-1.47493	0.063786	0.223108	0.98	9927	tags=41%, list=18%, signal=50%
GO_GLUTAMINE_FAMILY_AMINO_ACID_METABOLIC_PROCESS	GO_GLUTAMINE_FAMILY_AMINO_ACID_METABOLIC_PROCESS		74	-0.429741	-1.47431	0.0530612	0.223256	0.98	14795	tags=50%, list=27%, signal=68%
GO_NUCLEOBASE_CONTAINING_SMALL_MOLECULE_BIOSYNTHETIC_PROCESS	GO_NUCLEOBASE_CONTAINING_SMALL_MOLECULE_BIOSYNTHETIC_PROCESS		107	-0.394321	-1.47431	0.0363636	0.222602	0.98	7268	tags=34%, list=13%, signal=39%
GO_NAD_BIOSYNTHETIC_PROCESS	GO_NAD_BIOSYNTHETIC_PROCESS		29	-0.459023	-1.47323	0.0605428	0.223399	0.98	10197	tags=38%, list=18%, signal=46%
GO_INORGANIC_ION_IMPORT_ACROSS_PLASMA_MEMBRANE	GO_INORGANIC_ION_IMPORT_ACROSS_PLASMA_MEMBRANE		97	-0.392112	-1.47306	0.025974	0.222978	0.98	8486	tags=29%, list=15%, signal=34%
GO_URONIC_ACID_METABOLIC_PROCESS	GO_URONIC_ACID_METABOLIC_PROCESS		23	-0.542129	-1.47257	0.0691057	0.222974	0.981	7585	tags=26%, list=14%, signal=30%
GO_SECONDARY_PALATE_DEVELOPMENT	GO_SECONDARY_PALATE_DEVELOPMENT		24	-0.49966	-1.47254	0.0714286	0.222369	0.981	10464	tags=50%, list=19%, signal=62%
GO_POSITIVE_REGULATION_OF_MULTI_ORGANISM_PROCESS	GO_POSITIVE_REGULATION_OF_MULTI_ORGANISM_PROCESS		40	-0.433951	-1.47145	0.039916	0.222998	0.981	4330	tags=30%, list=8%, signal=33%
GO_ENERGY_RESERVE_METABOLIC_PROCESS	GO_ENERGY_RESERVE_METABOLIC_PROCESS		86	-0.402297	-1.47115	0.0309278	0.222804	0.981	9349	tags=33%, list=17%, signal=39%
GO_CELL_FATE_SPECIFICATION	GO_CELL_FATE_SPECIFICATION		101	-0.406955	-1.47063	0.0255864	0.222792	0.981	12376	tags=35%, list=22%, signal=45%
GO_UBIQUITIN_DEPENDENT_ERAD_PATHWAY	GO_UBIQUITIN_DEPENDENT_ERAD_PATHWAY		77	-0.470597	-1.47052	0.0890688	0.222354	0.981	7939	tags=32%, list=14%, signal=38%
GO_MEMBRANE_DEPOLARIZATION_DURING_ACTION_POTENTIAL	GO_MEMBRANE_DEPOLARIZATION_DURING_ACTION_POTENTIAL		37	-0.456223	-1.47052	0.0502183	0.221726	0.981	10420	tags=41%, list=19%, signal=50%
GO_NUCLEOSIDE_TRIPHOSPHATE_BIOSYNTHETIC_PROCESS	GO_NUCLEOSIDE_TRIPHOSPHATE_BIOSYNTHETIC_PROCESS		82	-0.450446	-1.46965	0.0845361	0.222162	0.981	9898	tags=44%, list=18%, signal=53%
GO_PERICARDIUM_DEVELOPMENT	GO_PERICARDIUM_DEVELOPMENT		20	-0.537486	-1.46937	0.083682	0.221962	0.981	8929	tags=50%, list=16%, signal=60%
GO_PYRIMIDINE_NUCLEOTIDE_METABOLIC_PROCESS	GO_PYRIMIDINE_NUCLEOTIDE_METABOLIC_PROCESS		46	-0.455009	-1.46664	0.0661323	0.224899	0.981	7576	tags=33%, list=14%, signal=38%
GO_HYDROGEN_PEROXIDE_METABOLIC_PROCESS	GO_HYDROGEN_PEROXIDE_METABOLIC_PROCESS		57	-0.439807	-1.466	0.0479167	0.225192	0.982	13850	tags=47%, list=25%, signal=63%
GO_VESICLE_CARGO_LOADING	GO_VESICLE_CARGO_LOADING		27	-0.566551	-1.46575	0.0833333	0.224878	0.982	8794	tags=52%, list=16%, signal=62%
GO_MRNA_5_SPLICE_SITE_RECOGNITION	GO_MRNA_5_SPLICE_SITE_RECOGNITION		26	-0.538519	-1.46566	0.0833333	0.224375	0.982	13979	tags=54%, list=25%, signal=72%
GO_REGULATION_OF_SMOOTHENED_SIGNALING_PATHWAY	GO_REGULATION_OF_SMOOTHENED_SIGNALING_PATHWAY		86	-0.451446	-1.46521	0.0829876	0.224416	0.982	8722	tags=36%, list=16%, signal=43%
GO_CELLULAR_TRANSITION_METAL_ION_HOMEOSTASIS	GO_CELLULAR_TRANSITION_METAL_ION_HOMEOSTASIS		115	-0.399553	-1.46514	0.0469083	0.223882	0.982	12740	tags=38%, list=23%, signal=50%
GO_CALCIUM_ION_IMPORT	GO_CALCIUM_ION_IMPORT		84	-0.416468	-1.46503	0.0325866	0.223404	0.982	9166	tags=36%, list=17%, signal=43%
GO_POSITIVE_REGULATION_OF_MUSCLE_CONTRACTION	GO_POSITIVE_REGULATION_OF_MUSCLE_CONTRACTION		45	-0.42679	-1.46479	0.0405983	0.22306	0.982	6925	tags=33%, list=12%, signal=38%
GO_VENTRAL_SPINAL_CORD_DEVELOPMENT	GO_VENTRAL_SPINAL_CORD_DEVELOPMENT		49	-0.452323	-1.46373	0.0450644	0.223734	0.983	10206	tags=37%, list=18%, signal=45%
GO_NEUTRAL_LIPID_METABOLIC_PROCESS	GO_NEUTRAL_LIPID_METABOLIC_PROCESS		136	-0.369395	-1.46342	0.0210084	0.223541	0.983	8190	tags=27%, list=15%, signal=32%
GO_REGULATION_OF_MICROTUBULE_BASED_MOVEMENT	GO_REGULATION_OF_MICROTUBULE_BASED_MOVEMENT		48	-0.443347	-1.4627	0.0425532	0.223953	0.983	9166	tags=40%, list=17%, signal=47%
GO_ENDOPLASMIC_RETICULUM_CALCIUM_ION_HOMEOSTASIS	GO_ENDOPLASMIC_RETICULUM_CALCIUM_ION_HOMEOSTASIS		24	-0.500597	-1.46154	0.0643863	0.224861	0.983	5647	tags=38%, list=10%, signal=42%
GO_CYCLIC_NUCLEOTIDE_METABOLIC_PROCESS	GO_CYCLIC_NUCLEOTIDE_METABOLIC_PROCESS		40	-0.449351	-1.46147	0.0362473	0.224362	0.983	5966	tags=38%, list=11%, signal=42%
GO_STEROID_CATABOLIC_PROCESS	GO_STEROID_CATABOLIC_PROCESS		27	-0.460744	-1.46072	0.0495868	0.224738	0.983	3305	tags=22%, list=6%, signal=24%
GO_ANGIOGENESIS_INVOLVED_IN_WOUND_HEALING	GO_ANGIOGENESIS_INVOLVED_IN_WOUND_HEALING		28	-0.517535	-1.45931	0.0944558	0.225929	0.983	6830	tags=36%, list=12%, signal=41%
GO_REGULATION_OF_PLASMA_LIPOPROTEIN_PARTICLE_LEVELS	GO_REGULATION_OF_PLASMA_LIPOPROTEIN_PARTICLE_LEVELS		99	-0.389823	-1.45884	0.0476191	0.22588	0.983	7753	tags=28%, list=14%, signal=33%
GO_RESPONSE_TO_IRON_ION	GO_RESPONSE_TO_IRON_ION		33	-0.472687	-1.45656	0.0568421	0.227987	0.983	7555	tags=36%, list=14%, signal=42%
GO_FATTY_ACID_DERIVATIVE_TRANSPORT	GO_FATTY_ACID_DERIVATIVE_TRANSPORT		50	-0.404107	-1.45605	0.0408998	0.228045	0.983	8294	tags=28%, list=15%, signal=33%
GO_CELLULAR_MODIFIED_AMINO_ACID_BIOSYNTHETIC_PROCESS	GO_CELLULAR_MODIFIED_AMINO_ACID_BIOSYNTHETIC_PROCESS		49	-0.451534	-1.45603	0.0795918	0.227449	0.983	7103	tags=37%, list=13%, signal=42%
GO_POSITIVE_REGULATION_OF_ORGAN_GROWTH	GO_POSITIVE_REGULATION_OF_ORGAN_GROWTH		60	-0.409886	-1.4555	0.0464135	0.227602	0.984	9696	tags=35%, list=17%, signal=42%
GO_NEGATIVE_REGULATION_OF_VASCULAR_ASSOCIATED_SMOOTH_MUSCLE_CELL_PROLIFERATION	GO_NEGATIVE_REGULATION_OF_VASCULAR_ASSOCIATED_SMOOTH_MUSCLE_CELL_PROLIFERATION		29	-0.457374	-1.45366	0.0668016	0.229484	0.984	11729	tags=28%, list=21%, signal=35%
GO_FOREBRAIN_GENERATION_OF_NEURONS	GO_FOREBRAIN_GENERATION_OF_NEURONS		61	-0.423368	-1.45328	0.0516129	0.229398	0.985	8326	tags=31%, list=15%, signal=37%
GO_POSITIVE_REGULATION_OF_BMP_SIGNALING_PATHWAY	GO_POSITIVE_REGULATION_OF_BMP_SIGNALING_PATHWAY		35	-0.475721	-1.45313	0.0587002	0.228915	0.985	11234	tags=46%, list=20%, signal=57%
GO_MEMBRANE_REPOLARIZATION	GO_MEMBRANE_REPOLARIZATION		46	-0.428614	-1.45257	0.0626305	0.22896	0.985	10486	tags=41%, list=19%, signal=51%
GO_RIBONUCLEOSIDE_TRIPHOSPHATE_METABOLIC_PROCESS	GO_RIBONUCLEOSIDE_TRIPHOSPHATE_METABOLIC_PROCESS		85	-0.430103	-1.45236	0.0877551	0.228643	0.985	9898	tags=41%, list=18%, signal=50%
GO_INNER_EAR_RECEPTOR_CELL_STEREOCILIUM_ORGANIZATION	GO_INNER_EAR_RECEPTOR_CELL_STEREOCILIUM_ORGANIZATION		30	-0.434482	-1.45201	0.0460922	0.228432	0.985	8109	tags=37%, list=15%, signal=43%
GO_POSITIVE_REGULATION_OF_NEUROBLAST_PROLIFERATION	GO_POSITIVE_REGULATION_OF_NEUROBLAST_PROLIFERATION		23	-0.506157	-1.45098	0.079918	0.229141	0.985	8379	tags=43%, list=15%, signal=51%
GO_MRNA_CIS_SPLICING_VIA_SPLICEOSOME	GO_MRNA_CIS_SPLICING_VIA_SPLICEOSOME		55	-0.47312	-1.45067	0.0988142	0.228945	0.985	14195	tags=47%, list=26%, signal=63%
GO_POSITIVE_REGULATION_OF_SMOOTH_MUSCLE_CONTRACTION	GO_POSITIVE_REGULATION_OF_SMOOTH_MUSCLE_CONTRACTION		30	-0.448061	-1.44867	0.0490798	0.230888	0.985	6436	tags=37%, list=12%, signal=41%
GO_NEGATIVE_REGULATION_OF_LIPID_BIOSYNTHETIC_PROCESS	GO_NEGATIVE_REGULATION_OF_LIPID_BIOSYNTHETIC_PROCESS		58	-0.398606	-1.44848	0.036961	0.230502	0.985	8456	tags=26%, list=15%, signal=30%
GO_PROTEIN_HOMOTETRAMERIZATION	GO_PROTEIN_HOMOTETRAMERIZATION		59	-0.394734	-1.44767	0.0441767	0.230945	0.985	5651	tags=22%, list=10%, signal=25%
GO_REGULATION_OF_NEURAL_PRECURSOR_CELL_PROLIFERATION	GO_REGULATION_OF_NEURAL_PRECURSOR_CELL_PROLIFERATION		90	-0.413387	-1.44718	0.0625	0.230878	0.985	6968	tags=31%, list=13%, signal=36%
GO_EMBRYONIC_CAMERA_TYPE_EYE_MORPHOGENESIS	GO_EMBRYONIC_CAMERA_TYPE_EYE_MORPHOGENESIS		28	-0.499162	-1.44717	0.0920245	0.230289	0.985	9088	tags=46%, list=16%, signal=55%
GO_MITOCHONDRIAL_FISSION	GO_MITOCHONDRIAL_FISSION		42	-0.464457	-1.44591	0.0965092	0.231346	0.986	9090	tags=40%, list=16%, signal=48%
GO_PEROXISOMAL_MEMBRANE_TRANSPORT	GO_PEROXISOMAL_MEMBRANE_TRANSPORT		20	-0.57549	-1.44499	0.104255	0.232015	0.986	12814	tags=45%, list=23%, signal=58%
GO_NEGATIVE_REGULATION_OF_ATP_METABOLIC_PROCESS	GO_NEGATIVE_REGULATION_OF_ATP_METABOLIC_PROCESS		28	-0.460346	-1.44483	0.0457516	0.231673	0.986	6210	tags=29%, list=11%, signal=32%
GO_ADIPOSE_TISSUE_DEVELOPMENT	GO_ADIPOSE_TISSUE_DEVELOPMENT		44	-0.447548	-1.44358	0.0480167	0.232584	0.986	9652	tags=39%, list=17%, signal=47%
GO_L_GLUTAMATE_TRANSMEMBRANE_TRANSPORT	GO_L_GLUTAMATE_TRANSMEMBRANE_TRANSPORT		23	-0.460455	-1.44038	0.0485437	0.236246	0.987	10226	tags=39%, list=18%, signal=48%
GO_ALPHA_AMINO_ACID_BIOSYNTHETIC_PROCESS	GO_ALPHA_AMINO_ACID_BIOSYNTHETIC_PROCESS		66	-0.436375	-1.43936	0.0770791	0.236992	0.987	9252	tags=38%, list=17%, signal=45%
GO_RESPONSE_TO_ISCHEMIA	GO_RESPONSE_TO_ISCHEMIA		54	-0.429447	-1.43892	0.0731707	0.236984	0.988	9197	tags=33%, list=17%, signal=40%
GO_SPINAL_CORD_DEVELOPMENT	GO_SPINAL_CORD_DEVELOPMENT		109	-0.4036	-1.43883	0.0518359	0.236479	0.988	10809	tags=34%, list=19%, signal=42%
GO_REGULATION_OF_INSULIN_SECRETION	GO_REGULATION_OF_INSULIN_SECRETION		181	-0.352556	-1.43853	0.025	0.236301	0.988	9064	tags=28%, list=16%, signal=33%
GO_VASCULAR_PROCESS_IN_CIRCULATORY_SYSTEM	GO_VASCULAR_PROCESS_IN_CIRCULATORY_SYSTEM		187	-0.374749	-1.43791	0.0528541	0.236529	0.988	9351	tags=32%, list=17%, signal=38%
GO_DOPAMINE_METABOLIC_PROCESS	GO_DOPAMINE_METABOLIC_PROCESS		40	-0.423207	-1.43617	0.0490405	0.238145	0.988	6556	tags=33%, list=12%, signal=37%
GO_APOPTOTIC_DNA_FRAGMENTATION	GO_APOPTOTIC_DNA_FRAGMENTATION		25	-0.460393	-1.43485	0.0811966	0.239232	0.988	10669	tags=40%, list=19%, signal=50%
GO_ISOPRENOID_BIOSYNTHETIC_PROCESS	GO_ISOPRENOID_BIOSYNTHETIC_PROCESS		28	-0.485387	-1.43239	0.0846774	0.241801	0.989	14504	tags=54%, list=26%, signal=72%
GO_REGULATION_OF_SMOOTH_MUSCLE_CONTRACTION	GO_REGULATION_OF_SMOOTH_MUSCLE_CONTRACTION		63	-0.412049	-1.43163	0.0630252	0.242311	0.989	6436	tags=27%, list=12%, signal=30%
GO_NUCLEOSIDE_TRIPHOSPHATE_METABOLIC_PROCESS	GO_NUCLEOSIDE_TRIPHOSPHATE_METABOLIC_PROCESS		110	-0.407765	-1.42959	0.0793319	0.24441	0.989	9474	tags=37%, list=17%, signal=45%
GO_VASCULAR_ASSOCIATED_SMOOTH_MUSCLE_CONTRACTION	GO_VASCULAR_ASSOCIATED_SMOOTH_MUSCLE_CONTRACTION		24	-0.489568	-1.42934	0.0811966	0.244152	0.989	7272	tags=33%, list=13%, signal=38%
GO_PURINE_NUCLEOSIDE_TRIPHOSPHATE_METABOLIC_PROCESS	GO_PURINE_NUCLEOSIDE_TRIPHOSPHATE_METABOLIC_PROCESS		87	-0.432704	-1.42821	0.102128	0.245107	0.989	9898	tags=41%, list=18%, signal=50%
GO_REGULATION_OF_REPRODUCTIVE_PROCESS	GO_REGULATION_OF_REPRODUCTIVE_PROCESS		170	-0.358782	-1.42813	0.0327511	0.244613	0.989	9916	tags=31%, list=18%, signal=37%
GO_MEMBRANE_DEPOLARIZATION_DURING_CARDIAC_MUSCLE_CELL_ACTION_POTENTIAL	GO_MEMBRANE_DEPOLARIZATION_DURING_CARDIAC_MUSCLE_CELL_ACTION_POTENTIAL		23	-0.47865	-1.4278	0.0712743	0.244399	0.989	3929	tags=30%, list=7%, signal=33%
GO_HORMONE_MEDIATED_SIGNALING_PATHWAY	GO_HORMONE_MEDIATED_SIGNALING_PATHWAY		200	-0.378247	-1.42584	0.0600858	0.246433	0.99	7544	tags=24%, list=14%, signal=28%
GO_REGULATION_OF_OSTEOBLAST_DIFFERENTIATION	GO_REGULATION_OF_OSTEOBLAST_DIFFERENTIATION		123	-0.390375	-1.4258	0.088843	0.245889	0.99	9916	tags=35%, list=18%, signal=42%
GO_PHOTORECEPTOR_CELL_MAINTENANCE	GO_PHOTORECEPTOR_CELL_MAINTENANCE		41	-0.458282	-1.42323	0.093617	0.248775	0.991	9691	tags=37%, list=17%, signal=44%
GO_RESPONSE_TO_STEROL	GO_RESPONSE_TO_STEROL		35	-0.454099	-1.4228	0.0769231	0.248763	0.991	8929	tags=37%, list=16%, signal=44%
GO_POSITIVE_REGULATION_OF_CALCIUM_ION_TRANSMEMBRANE_TRANSPORT	GO_POSITIVE_REGULATION_OF_CALCIUM_ION_TRANSMEMBRANE_TRANSPORT		71	-0.401791	-1.42156	0.0619658	0.249784	0.991	10836	tags=38%, list=20%, signal=47%
GO_RESPIRATORY_GASEOUS_EXCHANGE_BY_RESPIRATORY_SYSTEM	GO_RESPIRATORY_GASEOUS_EXCHANGE_BY_RESPIRATORY_SYSTEM		66	-0.395496	-1.42142	0.0466102	0.249344	0.991	8418	tags=29%, list=15%, signal=34%
GO_INDOLE_CONTAINING_COMPOUND_METABOLIC_PROCESS	GO_INDOLE_CONTAINING_COMPOUND_METABOLIC_PROCESS		24	-0.485321	-1.42084	0.0689655	0.249537	0.991	15669	tags=58%, list=28%, signal=81%
GO_VESICLE_TARGETING_TO_FROM_OR_WITHIN_GOLGI	GO_VESICLE_TARGETING_TO_FROM_OR_WITHIN_GOLGI		74	-0.470243	-1.42058	0.123457	0.249314	0.991	10507	tags=46%, list=19%, signal=57%
GO_ISOPRENOID_METABOLIC_PROCESS	GO_ISOPRENOID_METABOLIC_PROCESS		144	-0.370043	-1.41976	0.0456432	0.24986	0.991	7753	tags=26%, list=14%, signal=31%
GO_FOREBRAIN_NEURON_DIFFERENTIATION	GO_FOREBRAIN_NEURON_DIFFERENTIATION		51	-0.424239	-1.41933	0.0728051	0.24977	0.991	8326	tags=29%, list=15%, signal=35%
GO_SINGLE_FERTILIZATION	GO_SINGLE_FERTILIZATION		162	-0.350154	-1.41867	0.0408998	0.250062	0.991	12300	tags=36%, list=22%, signal=47%
GO_ALDITOL_METABOLIC_PROCESS	GO_ALDITOL_METABOLIC_PROCESS		25	-0.472123	-1.41859	0.0863454	0.249555	0.991	7557	tags=32%, list=14%, signal=37%
GO_FERTILIZATION	GO_FERTILIZATION		196	-0.340551	-1.41817	0.0349794	0.249567	0.991	12682	tags=37%, list=23%, signal=48%
GO_ALCOHOL_BIOSYNTHETIC_PROCESS	GO_ALCOHOL_BIOSYNTHETIC_PROCESS		164	-0.379378	-1.41814	0.0494845	0.249008	0.991	7753	tags=27%, list=14%, signal=31%
GO_NON_MOTILE_CILIUM_ASSEMBLY	GO_NON_MOTILE_CILIUM_ASSEMBLY		56	-0.49654	-1.41639	0.137014	0.25085	0.991	3807	tags=25%, list=7%, signal=27%
GO_REGULATION_OF_CATION_CHANNEL_ACTIVITY	GO_REGULATION_OF_CATION_CHANNEL_ACTIVITY		182	-0.352491	-1.41624	0.0425532	0.250458	0.991	11301	tags=34%, list=20%, signal=42%
GO_RETINA_DEVELOPMENT_IN_CAMERA_TYPE_EYE	GO_RETINA_DEVELOPMENT_IN_CAMERA_TYPE_EYE		150	-0.377819	-1.41599	0.0580645	0.25021	0.991	8109	tags=28%, list=15%, signal=33%
GO_ERYTHROCYTE_DEVELOPMENT	GO_ERYTHROCYTE_DEVELOPMENT		35	-0.444896	-1.41598	0.0879828	0.24963	0.991	13242	tags=46%, list=24%, signal=60%
GO_REGULATION_OF_CARDIAC_MUSCLE_CONTRACTION_BY_REGULATION_OF_THE_RELEASE_OF_SEQUESTERED_CALCIUM_ION	GO_REGULATION_OF_CARDIAC_MUSCLE_CONTRACTION_BY_REGULATION_OF_THE_RELEASE_OF_SEQUESTERED_CALCIUM_ION		21	-0.493685	-1.41597	0.0788913	0.249064	0.991	13083	tags=57%, list=24%, signal=75%
GO_EYE_PHOTORECEPTOR_CELL_DIFFERENTIATION	GO_EYE_PHOTORECEPTOR_CELL_DIFFERENTIATION		46	-0.434571	-1.41561	0.0580645	0.249001	0.991	8109	tags=24%, list=15%, signal=28%
GO_IRON_SULFUR_CLUSTER_ASSEMBLY	GO_IRON_SULFUR_CLUSTER_ASSEMBLY		23	-0.552352	-1.41438	0.123772	0.250035	0.992	3837	tags=30%, list=7%, signal=33%
GO_REGULATION_OF_FAT_CELL_DIFFERENTIATION	GO_REGULATION_OF_FAT_CELL_DIFFERENTIATION		140	-0.365895	-1.41436	0.0594262	0.249476	0.992	12096	tags=39%, list=22%, signal=50%
GO_LIPOPROTEIN_METABOLIC_PROCESS	GO_LIPOPROTEIN_METABOLIC_PROCESS		135	-0.381312	-1.41397	0.0709939	0.249409	0.992	9841	tags=34%, list=18%, signal=41%
GO_FATTY_ACID_BIOSYNTHETIC_PROCESS	GO_FATTY_ACID_BIOSYNTHETIC_PROCESS		173	-0.343883	-1.41383	0.0283401	0.24903	0.992	10297	tags=33%, list=19%, signal=40%
GO_REGULATION_OF_CELLULAR_KETONE_METABOLIC_PROCESS	GO_REGULATION_OF_CELLULAR_KETONE_METABOLIC_PROCESS		188	-0.369077	-1.41293	0.073922	0.249618	0.992	9349	tags=26%, list=17%, signal=31%
GO_REGULATION_OF_ANIMAL_ORGAN_FORMATION	GO_REGULATION_OF_ANIMAL_ORGAN_FORMATION		37	-0.453407	-1.41149	0.0752688	0.2509	0.993	12144	tags=41%, list=22%, signal=52%
GO_REGULATION_OF_CHOLESTEROL_BIOSYNTHETIC_PROCESS	GO_REGULATION_OF_CHOLESTEROL_BIOSYNTHETIC_PROCESS		50	-0.444181	-1.40984	0.0863454	0.252593	0.993	4920	tags=26%, list=9%, signal=29%
GO_MONOAMINE_TRANSPORT	GO_MONOAMINE_TRANSPORT		84	-0.394619	-1.40747	0.0759219	0.2551	0.993	8698	tags=29%, list=16%, signal=34%
GO_NEGATIVE_REGULATION_OF_HEART_CONTRACTION	GO_NEGATIVE_REGULATION_OF_HEART_CONTRACTION		29	-0.44919	-1.40723	0.0794297	0.254784	0.993	4013	tags=24%, list=7%, signal=26%
GO_ACETYL_COA_BIOSYNTHETIC_PROCESS	GO_ACETYL_COA_BIOSYNTHETIC_PROCESS		22	-0.576081	-1.40628	0.145492	0.255492	0.993	6452	tags=50%, list=12%, signal=57%
GO_CELLULAR_RESPONSE_TO_TOPOLOGICALLY_INCORRECT_PROTEIN	GO_CELLULAR_RESPONSE_TO_TOPOLOGICALLY_INCORRECT_PROTEIN		166	-0.41339	-1.40599	0.104167	0.255331	0.993	9375	tags=31%, list=17%, signal=38%
GO_SENSORY_PERCEPTION_OF_MECHANICAL_STIMULUS	GO_SENSORY_PERCEPTION_OF_MECHANICAL_STIMULUS		173	-0.343405	-1.40547	0.0322581	0.255389	0.993	10278	tags=29%, list=19%, signal=36%
GO_PEPTIDYL_PROLINE_MODIFICATION	GO_PEPTIDYL_PROLINE_MODIFICATION		60	-0.414948	-1.40521	0.0946237	0.255129	0.993	13066	tags=35%, list=24%, signal=46%
GO_NEGATIVE_REGULATION_OF_BLOOD_CIRCULATION	GO_NEGATIVE_REGULATION_OF_BLOOD_CIRCULATION		38	-0.437309	-1.405	0.0985626	0.25481	0.993	9007	tags=29%, list=16%, signal=35%
GO_NEGATIVE_REGULATION_OF_CELL_MIGRATION_INVOLVED_IN_SPROUTING_ANGIOGENESIS	GO_NEGATIVE_REGULATION_OF_CELL_MIGRATION_INVOLVED_IN_SPROUTING_ANGIOGENESIS		40	-0.41562	-1.40304	0.10387	0.25694	0.993	5038	tags=15%, list=9%, signal=16%
GO_GOLGI_VESICLE_BUDDING	GO_GOLGI_VESICLE_BUDDING		81	-0.464317	-1.40291	0.126033	0.256528	0.993	10507	tags=43%, list=19%, signal=53%
GO_REGULATION_OF_CARBOHYDRATE_BIOSYNTHETIC_PROCESS	GO_REGULATION_OF_CARBOHYDRATE_BIOSYNTHETIC_PROCESS		99	-0.367584	-1.40217	0.0666667	0.256924	0.993	8708	tags=27%, list=16%, signal=32%
GO_NEGATIVE_REGULATION_OF_LIPID_TRANSPORT	GO_NEGATIVE_REGULATION_OF_LIPID_TRANSPORT		41	-0.411396	-1.40101	0.0484848	0.257908	0.994	4633	tags=17%, list=8%, signal=19%
GO_NEUROMUSCULAR_JUNCTION_DEVELOPMENT	GO_NEUROMUSCULAR_JUNCTION_DEVELOPMENT		50	-0.441953	-1.40079	0.102296	0.25768	0.994	6765	tags=28%, list=12%, signal=32%
GO_COPII_COATED_VESICLE_BUDDING	GO_COPII_COATED_VESICLE_BUDDING		73	-0.460145	-1.40078	0.125773	0.257112	0.994	10507	tags=44%, list=19%, signal=54%
GO_NEURON_CELLULAR_HOMEOSTASIS	GO_NEURON_CELLULAR_HOMEOSTASIS		34	-0.436811	-1.40059	0.0618337	0.256807	0.994	8891	tags=32%, list=16%, signal=39%
GO_REGULATION_OF_SYNAPTIC_VESICLE_EXOCYTOSIS	GO_REGULATION_OF_SYNAPTIC_VESICLE_EXOCYTOSIS		80	-0.39006	-1.40002	0.061674	0.256977	0.994	8867	tags=34%, list=16%, signal=40%
GO_POSITIVE_REGULATION_OF_NEURAL_PRECURSOR_CELL_PROLIFERATION	GO_POSITIVE_REGULATION_OF_NEURAL_PRECURSOR_CELL_PROLIFERATION		54	-0.420408	-1.4	0.0809129	0.256424	0.994	8379	tags=35%, list=15%, signal=41%
GO_REGULATION_OF_SODIUM_ION_TRANSMEMBRANE_TRANSPORT	GO_REGULATION_OF_SODIUM_ION_TRANSMEMBRANE_TRANSPORT		65	-0.394034	-1.39956	0.0731183	0.256389	0.994	5506	tags=22%, list=10%, signal=24%
GO_REGULATION_OF_ORGAN_GROWTH	GO_REGULATION_OF_ORGAN_GROWTH		112	-0.381285	-1.39924	0.0973085	0.256315	0.994	9696	tags=30%, list=17%, signal=37%
GO_DNA_REPLICATION_DEPENDENT_NUCLEOSOME_ORGANIZATION	GO_DNA_REPLICATION_DEPENDENT_NUCLEOSOME_ORGANIZATION		30	-0.518613	-1.39829	0.15493	0.25695	0.994	9263	tags=47%, list=17%, signal=56%
GO_POSITIVE_REGULATION_OF_LIPID_METABOLIC_PROCESS	GO_POSITIVE_REGULATION_OF_LIPID_METABOLIC_PROCESS		151	-0.358451	-1.39721	0.0658436	0.25783	0.995	9349	tags=28%, list=17%, signal=34%
GO_ARACHIDONIC_ACID_SECRETION	GO_ARACHIDONIC_ACID_SECRETION		32	-0.414345	-1.39669	0.0688935	0.257961	0.995	8294	tags=31%, list=15%, signal=37%
GO_PROTEIN_LIPID_COMPLEX_ASSEMBLY	GO_PROTEIN_LIPID_COMPLEX_ASSEMBLY		34	-0.458199	-1.39616	0.0983936	0.258068	0.995	9531	tags=41%, list=17%, signal=50%
GO_NEGATIVE_REGULATION_OF_CELLULAR_RESPONSE_TO_INSULIN_STIMULUS	GO_NEGATIVE_REGULATION_OF_CELLULAR_RESPONSE_TO_INSULIN_STIMULUS		35	-0.430252	-1.39607	0.102345	0.257641	0.995	13043	tags=46%, list=24%, signal=60%
GO_RETROGRADE_VESICLE_MEDIATED_TRANSPORT_GOLGI_TO_ENDOPLASMIC_RETICULUM	GO_RETROGRADE_VESICLE_MEDIATED_TRANSPORT_GOLGI_TO_ENDOPLASMIC_RETICULUM		87	-0.447488	-1.39603	0.134021	0.257118	0.995	9470	tags=37%, list=17%, signal=44%
GO_AXIS_SPECIFICATION	GO_AXIS_SPECIFICATION		88	-0.400706	-1.39537	0.0630252	0.257414	0.995	12376	tags=42%, list=22%, signal=54%
GO_VENTRICULAR_SYSTEM_DEVELOPMENT	GO_VENTRICULAR_SYSTEM_DEVELOPMENT		32	-0.454583	-1.39469	0.0955285	0.257742	0.995	7108	tags=34%, list=13%, signal=39%
GO_POSITIVE_REGULATION_OF_PATHWAY_RESTRICTED_SMAD_PROTEIN_PHOSPHORYLATION	GO_POSITIVE_REGULATION_OF_PATHWAY_RESTRICTED_SMAD_PROTEIN_PHOSPHORYLATION		48	-0.404699	-1.39449	0.0711297	0.257485	0.995	11280	tags=44%, list=20%, signal=55%
GO_STEROID_HORMONE_MEDIATED_SIGNALING_PATHWAY	GO_STEROID_HORMONE_MEDIATED_SIGNALING_PATHWAY		139	-0.390556	-1.3936	0.0977131	0.258146	0.995	7544	tags=27%, list=14%, signal=32%
GO_SODIUM_ION_HOMEOSTASIS	GO_SODIUM_ION_HOMEOSTASIS		52	-0.397039	-1.39252	0.0683761	0.25901	0.995	6792	tags=25%, list=12%, signal=28%
GO_NEGATIVE_REGULATION_OF_INTRACELLULAR_PROTEIN_TRANSPORT	GO_NEGATIVE_REGULATION_OF_INTRACELLULAR_PROTEIN_TRANSPORT		43	-0.408196	-1.39241	0.0796646	0.258608	0.995	4998	tags=28%, list=9%, signal=31%
GO_SPECIFICATION_OF_ANIMAL_ORGAN_IDENTITY	GO_SPECIFICATION_OF_ANIMAL_ORGAN_IDENTITY		36	-0.457642	-1.3924	0.0802603	0.25806	0.995	5796	tags=25%, list=10%, signal=28%
GO_REGULATION_OF_LIPID_CATABOLIC_PROCESS	GO_REGULATION_OF_LIPID_CATABOLIC_PROCESS		60	-0.413123	-1.39146	0.081761	0.258816	0.995	9349	tags=28%, list=17%, signal=34%
GO_CARDIAC_CHAMBER_MORPHOGENESIS	GO_CARDIAC_CHAMBER_MORPHOGENESIS		130	-0.396153	-1.39016	0.098081	0.259906	0.995	7832	tags=32%, list=14%, signal=38%
GO_DIACYLGLYCEROL_METABOLIC_PROCESS	GO_DIACYLGLYCEROL_METABOLIC_PROCESS		25	-0.458469	-1.38998	0.0921569	0.259614	0.996	7830	tags=36%, list=14%, signal=42%
GO_PATHWAY_RESTRICTED_SMAD_PROTEIN_PHOSPHORYLATION	GO_PATHWAY_RESTRICTED_SMAD_PROTEIN_PHOSPHORYLATION		65	-0.399518	-1.38987	0.0957447	0.259209	0.996	10545	tags=38%, list=19%, signal=47%
GO_CARDIAC_CONDUCTION	GO_CARDIAC_CONDUCTION		146	-0.371788	-1.38883	0.0813704	0.26015	0.996	10836	tags=36%, list=20%, signal=44%
GO_CELLULAR_RESPONSE_TO_GLUCOSE_STARVATION	GO_CELLULAR_RESPONSE_TO_GLUCOSE_STARVATION		49	-0.442064	-1.38676	0.118257	0.262436	0.996	9685	tags=43%, list=17%, signal=52%
GO_ATRIAL_CARDIAC_MUSCLE_CELL_TO_AV_NODE_CELL_SIGNALING	GO_ATRIAL_CARDIAC_MUSCLE_CELL_TO_AV_NODE_CELL_SIGNALING		20	-0.479099	-1.38651	0.102941	0.262214	0.996	10420	tags=45%, list=19%, signal=55%
GO_REGULATION_OF_SYSTEMIC_ARTERIAL_BLOOD_PRESSURE_BY_HORMONE	GO_REGULATION_OF_SYSTEMIC_ARTERIAL_BLOOD_PRESSURE_BY_HORMONE		40	-0.434156	-1.38638	0.105832	0.261849	0.996	9351	tags=35%, list=17%, signal=42%
GO_PROTEIN_HOMOOLIGOMERIZATION	GO_PROTEIN_HOMOOLIGOMERIZATION		178	-0.346099	-1.38617	0.0561331	0.26158	0.996	9029	tags=29%, list=16%, signal=35%
GO_AMINE_BIOSYNTHETIC_PROCESS	GO_AMINE_BIOSYNTHETIC_PROCESS		24	-0.480697	-1.38607	0.11	0.261149	0.996	11958	tags=46%, list=22%, signal=58%
GO_REGULATION_OF_RENAL_SYSTEM_PROCESS	GO_REGULATION_OF_RENAL_SYSTEM_PROCESS		35	-0.442957	-1.386	0.0995763	0.260684	0.996	6251	tags=29%, list=11%, signal=32%
GO_BILE_ACID_AND_BILE_SALT_TRANSPORT	GO_BILE_ACID_AND_BILE_SALT_TRANSPORT		29	-0.454052	-1.38587	0.0916335	0.26033	0.996	15176	tags=55%, list=27%, signal=76%
GO_LIPOSACCHARIDE_METABOLIC_PROCESS	GO_LIPOSACCHARIDE_METABOLIC_PROCESS		111	-0.379402	-1.3853	0.100616	0.260511	0.996	11580	tags=43%, list=21%, signal=55%
GO_BONE_GROWTH	GO_BONE_GROWTH		31	-0.457163	-1.38416	0.0945378	0.261421	0.996	8803	tags=39%, list=16%, signal=46%
GO_GLYCOLIPID_BIOSYNTHETIC_PROCESS	GO_GLYCOLIPID_BIOSYNTHETIC_PROCESS		66	-0.395241	-1.38403	0.112676	0.261022	0.996	9796	tags=38%, list=18%, signal=46%
GO_CYCLIC_NUCLEOTIDE_BIOSYNTHETIC_PROCESS	GO_CYCLIC_NUCLEOTIDE_BIOSYNTHETIC_PROCESS		22	-0.478156	-1.38402	0.111111	0.260489	0.996	11822	tags=50%, list=21%, signal=64%
GO_LIPID_HOMEOSTASIS	GO_LIPID_HOMEOSTASIS		159	-0.346557	-1.38399	0.0333333	0.259967	0.996	8716	tags=27%, list=16%, signal=32%
GO_REGULATION_OF_MITOCHONDRIAL_MEMBRANE_POTENTIAL	GO_REGULATION_OF_MITOCHONDRIAL_MEMBRANE_POTENTIAL		74	-0.379195	-1.38325	0.0945378	0.260357	0.996	14382	tags=50%, list=26%, signal=67%
GO_NEGATIVE_REGULATION_OF_CELL_CYCLE_ARREST	GO_NEGATIVE_REGULATION_OF_CELL_CYCLE_ARREST		22	-0.460587	-1.3831	0.0944558	0.260025	0.996	1186	tags=23%, list=2%, signal=23%
GO_ENDOCRINE_PROCESS	GO_ENDOCRINE_PROCESS		84	-0.376311	-1.38291	0.0659575	0.2597	0.996	10464	tags=33%, list=19%, signal=41%
GO_PEPTIDYL_SERINE_DEPHOSPHORYLATION	GO_PEPTIDYL_SERINE_DEPHOSPHORYLATION		20	-0.492841	-1.38291	0.121514	0.259173	0.996	17893	tags=65%, list=32%, signal=96%
GO_TRNA_WOBBLE_BASE_MODIFICATION	GO_TRNA_WOBBLE_BASE_MODIFICATION		22	-0.521181	-1.38211	0.118393	0.259661	0.996	10554	tags=41%, list=19%, signal=51%
GO_NEGATIVE_REGULATION_OF_PROTEASOMAL_PROTEIN_CATABOLIC_PROCESS	GO_NEGATIVE_REGULATION_OF_PROTEASOMAL_PROTEIN_CATABOLIC_PROCESS		58	-0.426193	-1.38186	0.123016	0.259528	0.996	9698	tags=40%, list=17%, signal=48%
GO_SEROTONIN_TRANSPORT	GO_SEROTONIN_TRANSPORT		21	-0.487765	-1.38123	0.0987124	0.259775	0.996	6210	tags=24%, list=11%, signal=27%
GO_MITOCHONDRION_LOCALIZATION	GO_MITOCHONDRION_LOCALIZATION		46	-0.438377	-1.38044	0.0920502	0.260267	0.996	10950	tags=41%, list=20%, signal=51%
GO_RENAL_SYSTEM_VASCULATURE_DEVELOPMENT	GO_RENAL_SYSTEM_VASCULATURE_DEVELOPMENT		28	-0.533485	-1.38028	0.158898	0.259944	0.996	7560	tags=43%, list=14%, signal=50%
GO_VENTRICULAR_CARDIAC_MUSCLE_CELL_ACTION_POTENTIAL	GO_VENTRICULAR_CARDIAC_MUSCLE_CELL_ACTION_POTENTIAL		35	-0.422821	-1.37927	0.0702128	0.260732	0.996	10486	tags=43%, list=19%, signal=53%
GO_PH_REDUCTION	GO_PH_REDUCTION		58	-0.406716	-1.37888	0.105368	0.26069	0.996	8429	tags=31%, list=15%, signal=37%
GO_CELLULAR_RESPONSE_TO_GLUCAGON_STIMULUS	GO_CELLULAR_RESPONSE_TO_GLUCAGON_STIMULUS		26	-0.445433	-1.37869	0.0914513	0.260393	0.996	5966	tags=27%, list=11%, signal=30%
GO_SIALYLATION	GO_SIALYLATION		20	-0.474218	-1.37855	0.108607	0.260041	0.996	3959	tags=30%, list=7%, signal=32%
GO_NEGATIVE_REGULATION_OF_PEPTIDYL_SERINE_PHOSPHORYLATION	GO_NEGATIVE_REGULATION_OF_PEPTIDYL_SERINE_PHOSPHORYLATION		30	-0.42601	-1.37848	0.0855397	0.259604	0.996	4013	tags=23%, list=7%, signal=25%
GO_TRANSITION_METAL_ION_HOMEOSTASIS	GO_TRANSITION_METAL_ION_HOMEOSTASIS		137	-0.355039	-1.37812	0.0696721	0.259588	0.996	12740	tags=36%, list=23%, signal=47%
GO_KIDNEY_EPITHELIUM_DEVELOPMENT	GO_KIDNEY_EPITHELIUM_DEVELOPMENT		142	-0.380367	-1.37795	0.0840336	0.259277	0.996	7764	tags=29%, list=14%, signal=33%
GO_PEPTIDYL_LYSINE_METHYLATION	GO_PEPTIDYL_LYSINE_METHYLATION		131	-0.427462	-1.37774	0.153242	0.259042	0.996	12997	tags=40%, list=23%, signal=53%
GO_POSITIVE_REGULATION_OF_STEROID_BIOSYNTHETIC_PROCESS	GO_POSITIVE_REGULATION_OF_STEROID_BIOSYNTHETIC_PROCESS		21	-0.463992	-1.37721	0.0828283	0.259195	0.996	4070	tags=19%, list=7%, signal=21%
GO_STEROL_BIOSYNTHETIC_PROCESS	GO_STEROL_BIOSYNTHETIC_PROCESS		81	-0.405926	-1.37485	0.101626	0.26187	0.996	9128	tags=33%, list=16%, signal=40%
GO_PEPTIDYL_ARGININE_MODIFICATION	GO_PEPTIDYL_ARGININE_MODIFICATION		27	-0.42489	-1.37464	0.0761317	0.261641	0.996	7635	tags=30%, list=14%, signal=34%
GO_CARDIAC_CHAMBER_DEVELOPMENT	GO_CARDIAC_CHAMBER_DEVELOPMENT		172	-0.389376	-1.37385	0.109015	0.262155	0.996	7832	tags=31%, list=14%, signal=36%
GO_RETINOIC_ACID_RECEPTOR_SIGNALING_PATHWAY	GO_RETINOIC_ACID_RECEPTOR_SIGNALING_PATHWAY		33	-0.420742	-1.37356	0.0926316	0.262009	0.997	4132	tags=27%, list=7%, signal=29%
GO_RRNA_METHYLATION	GO_RRNA_METHYLATION		28	-0.51168	-1.37156	0.132924	0.264233	0.998	16768	tags=50%, list=30%, signal=72%
GO_HOMEOSTASIS_OF_NUMBER_OF_CELLS_WITHIN_A_TISSUE	GO_HOMEOSTASIS_OF_NUMBER_OF_CELLS_WITHIN_A_TISSUE		29	-0.46143	-1.37121	0.119048	0.264184	0.998	4641	tags=24%, list=8%, signal=26%
GO_GLUTATHIONE_DERIVATIVE_METABOLIC_PROCESS	GO_GLUTATHIONE_DERIVATIVE_METABOLIC_PROCESS		21	-0.524532	-1.37117	0.146939	0.263704	0.998	6395	tags=38%, list=12%, signal=43%
GO_NEUROBLAST_PROLIFERATION	GO_NEUROBLAST_PROLIFERATION		61	-0.403293	-1.37088	0.103376	0.263565	0.998	8515	tags=36%, list=15%, signal=43%
GO_MYOBLAST_PROLIFERATION	GO_MYOBLAST_PROLIFERATION		24	-0.460676	-1.37037	0.127349	0.263708	0.998	12991	tags=29%, list=23%, signal=38%
GO_NEGATIVE_REGULATION_OF_STRIATED_MUSCLE_CELL_APOPTOTIC_PROCESS	GO_NEGATIVE_REGULATION_OF_STRIATED_MUSCLE_CELL_APOPTOTIC_PROCESS		31	-0.422317	-1.37036	0.0754717	0.263201	0.998	3901	tags=23%, list=7%, signal=24%
GO_TRIGLYCERIDE_METABOLIC_PROCESS	GO_TRIGLYCERIDE_METABOLIC_PROCESS		108	-0.352887	-1.36924	0.0617284	0.264182	0.998	9113	tags=28%, list=16%, signal=33%
GO_MEMBRANE_REPOLARIZATION_DURING_ACTION_POTENTIAL	GO_MEMBRANE_REPOLARIZATION_DURING_ACTION_POTENTIAL		28	-0.43041	-1.3684	0.0892857	0.264816	0.998	4882	tags=29%, list=9%, signal=31%
GO_POSITIVE_REGULATION_OF_TRANSMEMBRANE_RECEPTOR_PROTEIN_SERINE_THREONINE_KINASE_SIGNALING_PATHWAY	GO_POSITIVE_REGULATION_OF_TRANSMEMBRANE_RECEPTOR_PROTEIN_SERINE_THREONINE_KINASE_SIGNALING_PATHWAY		110	-0.365351	-1.36778	0.0705645	0.265083	0.998	11308	tags=40%, list=20%, signal=50%
GO_NEGATIVE_REGULATION_OF_TRANSPORTER_ACTIVITY	GO_NEGATIVE_REGULATION_OF_TRANSPORTER_ACTIVITY		84	-0.382963	-1.36768	0.0724947	0.264732	0.998	10836	tags=31%, list=20%, signal=38%
GO_NEGATIVE_REGULATION_OF_POTASSIUM_ION_TRANSMEMBRANE_TRANSPORT	GO_NEGATIVE_REGULATION_OF_POTASSIUM_ION_TRANSMEMBRANE_TRANSPORT		30	-0.444079	-1.36653	0.0805085	0.26571	0.998	4474	tags=20%, list=8%, signal=22%
GO_VENTRICULAR_CARDIAC_MUSCLE_TISSUE_DEVELOPMENT	GO_VENTRICULAR_CARDIAC_MUSCLE_TISSUE_DEVELOPMENT		55	-0.432985	-1.36642	0.10625	0.265329	0.998	7832	tags=33%, list=14%, signal=38%
GO_LYMPH_VESSEL_DEVELOPMENT	GO_LYMPH_VESSEL_DEVELOPMENT		26	-0.513378	-1.36625	0.147059	0.265024	0.998	7784	tags=38%, list=14%, signal=45%
GO_REGULATION_OF_STEROL_TRANSPORT	GO_REGULATION_OF_STEROL_TRANSPORT		66	-0.374481	-1.36603	0.0718686	0.264862	0.998	13341	tags=38%, list=24%, signal=50%
GO_ORGAN_GROWTH	GO_ORGAN_GROWTH		184	-0.374217	-1.3659	0.114537	0.264526	0.998	9696	tags=29%, list=17%, signal=35%
GO_PHOSPHATIDIC_ACID_METABOLIC_PROCESS	GO_PHOSPHATIDIC_ACID_METABOLIC_PROCESS		51	-0.383445	-1.36581	0.0670732	0.264132	0.998	11943	tags=39%, list=22%, signal=50%
GO_TRANSITION_METAL_ION_TRANSPORT	GO_TRANSITION_METAL_ION_TRANSPORT		128	-0.351113	-1.36378	0.0903361	0.266292	0.998	7399	tags=23%, list=13%, signal=27%
GO_FEAR_RESPONSE	GO_FEAR_RESPONSE		41	-0.401467	-1.36372	0.0813187	0.265844	0.998	10203	tags=29%, list=18%, signal=36%
GO_REGULATION_OF_MEMBRANE_REPOLARIZATION	GO_REGULATION_OF_MEMBRANE_REPOLARIZATION		35	-0.413467	-1.3637	0.106122	0.265365	0.998	10486	tags=40%, list=19%, signal=49%
GO_REGULATION_OF_MUSCLE_CONTRACTION	GO_REGULATION_OF_MUSCLE_CONTRACTION		168	-0.369533	-1.36171	0.0890688	0.267545	0.998	6436	tags=26%, list=12%, signal=29%
GO_HOMOLOGOUS_CHROMOSOME_PAIRING_AT_MEIOSIS	GO_HOMOLOGOUS_CHROMOSOME_PAIRING_AT_MEIOSIS		49	-0.399144	-1.36127	0.109053	0.267592	0.998	6549	tags=27%, list=12%, signal=30%
GO_REGULATION_OF_TOR_SIGNALING	GO_REGULATION_OF_TOR_SIGNALING		101	-0.375085	-1.36118	0.123984	0.267227	0.998	11881	tags=37%, list=21%, signal=47%
GO_STEM_CELL_DIVISION	GO_STEM_CELL_DIVISION		44	-0.430036	-1.36072	0.139344	0.267363	0.998	9559	tags=41%, list=17%, signal=49%
GO_AMMONIUM_ION_METABOLIC_PROCESS	GO_AMMONIUM_ION_METABOLIC_PROCESS		25	-0.451196	-1.36053	0.10124	0.267104	0.998	6156	tags=28%, list=11%, signal=31%
GO_RESPONSE_TO_CADMIUM_ION	GO_RESPONSE_TO_CADMIUM_ION		64	-0.381205	-1.35912	0.068323	0.268505	0.998	13839	tags=45%, list=25%, signal=60%
GO_NEGATIVE_REGULATION_OF_PROTEIN_KINASE_B_SIGNALING	GO_NEGATIVE_REGULATION_OF_PROTEIN_KINASE_B_SIGNALING		55	-0.367282	-1.35887	0.081761	0.268328	0.998	11980	tags=38%, list=22%, signal=49%
GO_TRANSCRIPTION_BY_RNA_POLYMERASE_III	GO_TRANSCRIPTION_BY_RNA_POLYMERASE_III		47	-0.445332	-1.35841	0.139113	0.26846	0.998	15182	tags=62%, list=27%, signal=85%
GO_CARDIAC_SEPTUM_MORPHOGENESIS	GO_CARDIAC_SEPTUM_MORPHOGENESIS		76	-0.404504	-1.35837	0.112033	0.267999	0.998	10464	tags=42%, list=19%, signal=52%
GO_REGULATION_OF_HOMOTYPIC_CELL_CELL_ADHESION	GO_REGULATION_OF_HOMOTYPIC_CELL_CELL_ADHESION		30	-0.426157	-1.35827	0.119826	0.2676	0.998	2211	tags=23%, list=4%, signal=24%
GO_REGULATION_OF_SODIUM_ION_TRANSMEMBRANE_TRANSPORTER_ACTIVITY	GO_REGULATION_OF_SODIUM_ION_TRANSMEMBRANE_TRANSPORTER_ACTIVITY		55	-0.396292	-1.35812	0.117773	0.267331	0.998	3731	tags=18%, list=7%, signal=19%
GO_CELL_DIFFERENTIATION_INVOLVED_IN_KIDNEY_DEVELOPMENT	GO_CELL_DIFFERENTIATION_INVOLVED_IN_KIDNEY_DEVELOPMENT		57	-0.412915	-1.3579	0.106776	0.267126	0.998	4641	tags=28%, list=8%, signal=31%
GO_QUINONE_METABOLIC_PROCESS	GO_QUINONE_METABOLIC_PROCESS		36	-0.547326	-1.35754	0.112224	0.267134	0.998	15641	tags=61%, list=28%, signal=85%
GO_MITOCHONDRIAL_DEPOLARIZATION	GO_MITOCHONDRIAL_DEPOLARIZATION		24	-0.43094	-1.35719	0.108333	0.26712	0.998	8655	tags=33%, list=16%, signal=39%
GO_MULTICELLULAR_ORGANISM_GROWTH	GO_MULTICELLULAR_ORGANISM_GROWTH		150	-0.36437	-1.35669	0.115464	0.267266	0.998	8395	tags=31%, list=15%, signal=36%
GO_POSTSYNAPTIC_SPECIALIZATION_ORGANIZATION	GO_POSTSYNAPTIC_SPECIALIZATION_ORGANIZATION		34	-0.437072	-1.35636	0.105832	0.267273	0.998	7026	tags=35%, list=13%, signal=40%
GO_RESPONSE_TO_MINERALOCORTICOID	GO_RESPONSE_TO_MINERALOCORTICOID		32	-0.423337	-1.35514	0.0985626	0.268433	0.998	10185	tags=31%, list=18%, signal=38%
GO_POSITIVE_REGULATION_OF_TRANSPORTER_ACTIVITY	GO_POSITIVE_REGULATION_OF_TRANSPORTER_ACTIVITY		113	-0.353576	-1.35498	0.0659794	0.268148	0.998	10589	tags=35%, list=19%, signal=44%
GO_DOPAMINE_TRANSPORT	GO_DOPAMINE_TRANSPORT		49	-0.403053	-1.35493	0.107066	0.267719	0.998	8698	tags=33%, list=16%, signal=39%
GO_NEPHRON_MORPHOGENESIS	GO_NEPHRON_MORPHOGENESIS		77	-0.38385	-1.35492	0.0802469	0.267253	0.998	5394	tags=22%, list=10%, signal=24%
GO_REGULATION_OF_ATP_METABOLIC_PROCESS	GO_REGULATION_OF_ATP_METABOLIC_PROCESS		125	-0.367933	-1.35419	0.124473	0.267687	0.998	13669	tags=39%, list=25%, signal=52%
GO_LYMPH_VESSEL_MORPHOGENESIS	GO_LYMPH_VESSEL_MORPHOGENESIS		20	-0.519199	-1.35405	0.160164	0.267376	0.998	7339	tags=40%, list=13%, signal=46%
GO_REGULATION_OF_RESPONSE_TO_ENDOPLASMIC_RETICULUM_STRESS	GO_REGULATION_OF_RESPONSE_TO_ENDOPLASMIC_RETICULUM_STRESS		91	-0.410314	-1.35378	0.126273	0.26725	0.998	8011	tags=35%, list=14%, signal=41%
GO_NEGATIVE_REGULATION_OF_NUCLEOTIDE_METABOLIC_PROCESS	GO_NEGATIVE_REGULATION_OF_NUCLEOTIDE_METABOLIC_PROCESS		22	-0.451899	-1.35371	0.111345	0.266843	0.998	5817	tags=23%, list=10%, signal=25%
GO_NEURAL_PRECURSOR_CELL_PROLIFERATION	GO_NEURAL_PRECURSOR_CELL_PROLIFERATION		153	-0.369696	-1.35355	0.0863931	0.266583	0.998	8515	tags=31%, list=15%, signal=36%
GO_ORGANELLE_FUSION	GO_ORGANELLE_FUSION		140	-0.363171	-1.35326	0.102459	0.266491	0.998	12300	tags=42%, list=22%, signal=54%
GO_REGULATION_OF_ALCOHOL_BIOSYNTHETIC_PROCESS	GO_REGULATION_OF_ALCOHOL_BIOSYNTHETIC_PROCESS		82	-0.382975	-1.3527	0.0963115	0.266718	0.998	4920	tags=22%, list=9%, signal=24%
GO_FOREBRAIN_REGIONALIZATION	GO_FOREBRAIN_REGIONALIZATION		24	-0.474115	-1.35126	0.0980392	0.268119	0.998	12788	tags=38%, list=23%, signal=49%
GO_REGULATION_OF_GLUCOSE_IMPORT	GO_REGULATION_OF_GLUCOSE_IMPORT		59	-0.391584	-1.35085	0.0874752	0.268155	0.998	11798	tags=32%, list=21%, signal=41%
GO_INTERMEMBRANE_LIPID_TRANSFER	GO_INTERMEMBRANE_LIPID_TRANSFER		44	-0.404252	-1.35027	0.105691	0.268447	0.998	7753	tags=30%, list=14%, signal=34%
GO_NEGATIVE_REGULATION_OF_JNK_CASCADE	GO_NEGATIVE_REGULATION_OF_JNK_CASCADE		37	-0.428263	-1.35013	0.111801	0.268149	0.998	12079	tags=43%, list=22%, signal=55%
GO_OLIGODENDROCYTE_DEVELOPMENT	GO_OLIGODENDROCYTE_DEVELOPMENT		47	-0.366271	-1.3498	0.0784708	0.268135	0.998	4211	tags=19%, list=8%, signal=21%
GO_SULFUR_COMPOUND_CATABOLIC_PROCESS	GO_SULFUR_COMPOUND_CATABOLIC_PROCESS		56	-0.39416	-1.34942	0.102459	0.268136	0.999	6565	tags=27%, list=12%, signal=30%
GO_MESONEPHRIC_TUBULE_MORPHOGENESIS	GO_MESONEPHRIC_TUBULE_MORPHOGENESIS		66	-0.397428	-1.34933	0.0893971	0.267762	0.999	5394	tags=23%, list=10%, signal=25%
GO_REGULATION_OF_MITOCHONDRIAL_FISSION	GO_REGULATION_OF_MITOCHONDRIAL_FISSION		27	-0.460238	-1.34857	0.162551	0.26819	0.999	1250	tags=22%, list=2%, signal=23%
GO_REGULATION_OF_MULTI_ORGANISM_PROCESS	GO_REGULATION_OF_MULTI_ORGANISM_PROCESS		79	-0.356935	-1.3479	0.0842333	0.268637	0.999	6743	tags=25%, list=12%, signal=29%
GO_REGULATION_OF_TUBE_SIZE	GO_REGULATION_OF_TUBE_SIZE		141	-0.358268	-1.3477	0.0985626	0.268399	0.999	9652	tags=28%, list=17%, signal=34%
GO_REGULATION_OF_NEUROBLAST_PROLIFERATION	GO_REGULATION_OF_NEUROBLAST_PROLIFERATION		33	-0.428585	-1.34757	0.101871	0.268086	0.999	8379	tags=36%, list=15%, signal=43%
GO_POSITIVE_REGULATION_OF_BLOOD_CIRCULATION	GO_POSITIVE_REGULATION_OF_BLOOD_CIRCULATION		74	-0.371733	-1.34529	0.0867769	0.270489	0.999	7272	tags=27%, list=13%, signal=31%
GO_NUCLEOSOME_ASSEMBLY	GO_NUCLEOSOME_ASSEMBLY		142	-0.395361	-1.34466	0.137177	0.27079	0.999	9263	tags=29%, list=17%, signal=35%
GO_CARDIAC_MUSCLE_CONTRACTION	GO_CARDIAC_MUSCLE_CONTRACTION		137	-0.370069	-1.34402	0.0991903	0.271159	0.999	10836	tags=36%, list=20%, signal=44%
GO_DIOL_BIOSYNTHETIC_PROCESS	GO_DIOL_BIOSYNTHETIC_PROCESS		22	-0.481145	-1.34394	0.127049	0.270767	0.999	7674	tags=32%, list=14%, signal=37%
GO_REGULATION_OF_LIPID_TRANSPORT	GO_REGULATION_OF_LIPID_TRANSPORT		129	-0.331968	-1.34349	0.078629	0.270869	0.999	10368	tags=26%, list=19%, signal=31%
GO_L_ALPHA_AMINO_ACID_TRANSMEMBRANE_TRANSPORT	GO_L_ALPHA_AMINO_ACID_TRANSMEMBRANE_TRANSPORT		62	-0.379156	-1.34349	0.100402	0.270392	0.999	8145	tags=26%, list=15%, signal=30%
GO_VESICLE_TARGETING	GO_VESICLE_TARGETING		95	-0.437456	-1.3433	0.173824	0.270174	0.999	10507	tags=42%, list=19%, signal=52%
GO_ZINC_ION_TRANSPORT	GO_ZINC_ION_TRANSPORT		27	-0.453646	-1.343	0.133056	0.270064	0.999	7399	tags=26%, list=13%, signal=30%
GO_REGULATION_OF_NMDA_RECEPTOR_ACTIVITY	GO_REGULATION_OF_NMDA_RECEPTOR_ACTIVITY		36	-0.417898	-1.34285	0.125	0.26979	0.999	12232	tags=39%, list=22%, signal=50%
GO_VESICLE_BUDDING_FROM_MEMBRANE	GO_VESICLE_BUDDING_FROM_MEMBRANE		110	-0.401346	-1.34207	0.156	0.270329	0.999	10507	tags=40%, list=19%, signal=49%
GO_LUNG_EPITHELIUM_DEVELOPMENT	GO_LUNG_EPITHELIUM_DEVELOPMENT		37	-0.412744	-1.34191	0.11499	0.270043	0.999	8326	tags=30%, list=15%, signal=35%
GO_RESPONSE_TO_MANGANESE_ION	GO_RESPONSE_TO_MANGANESE_ION		20	-0.453948	-1.34122	0.102881	0.270496	0.999	6322	tags=30%, list=11%, signal=34%
GO_HISTONE_H3_DEACETYLATION	GO_HISTONE_H3_DEACETYLATION		20	-0.499631	-1.34113	0.152475	0.270129	0.999	7806	tags=35%, list=14%, signal=41%
GO_REGULATION_OF_SENSORY_PERCEPTION	GO_REGULATION_OF_SENSORY_PERCEPTION		39	-0.408643	-1.34035	0.108333	0.270714	0.999	12925	tags=36%, list=23%, signal=47%
GO_RELEASE_OF_SEQUESTERED_CALCIUM_ION_INTO_CYTOSOL_BY_ENDOPLASMIC_RETICULUM	GO_RELEASE_OF_SEQUESTERED_CALCIUM_ION_INTO_CYTOSOL_BY_ENDOPLASMIC_RETICULUM		34	-0.447525	-1.34018	0.126016	0.2705	0.999	10836	tags=44%, list=20%, signal=55%
GO_REGULATION_OF_OXIDOREDUCTASE_ACTIVITY	GO_REGULATION_OF_OXIDOREDUCTASE_ACTIVITY		115	-0.33903	-1.33997	0.0877551	0.270294	0.999	6210	tags=22%, list=11%, signal=24%
GO_ROOF_OF_MOUTH_DEVELOPMENT	GO_ROOF_OF_MOUTH_DEVELOPMENT		91	-0.398417	-1.33884	0.123932	0.271296	0.999	10464	tags=40%, list=19%, signal=49%
GO_TRABECULA_MORPHOGENESIS	GO_TRABECULA_MORPHOGENESIS		49	-0.43143	-1.33881	0.126338	0.27086	0.999	8417	tags=37%, list=15%, signal=43%
GO_POSITIVE_REGULATION_OF_BLOOD_VESSEL_DIAMETER	GO_POSITIVE_REGULATION_OF_BLOOD_VESSEL_DIAMETER		60	-0.368379	-1.3386	0.0993658	0.270658	0.999	8294	tags=23%, list=15%, signal=27%
GO_CELL_CELL_SIGNALING_INVOLVED_IN_CARDIAC_CONDUCTION	GO_CELL_CELL_SIGNALING_INVOLVED_IN_CARDIAC_CONDUCTION		32	-0.416972	-1.33857	0.127706	0.270232	0.999	10420	tags=41%, list=19%, signal=50%
GO_VITAMIN_METABOLIC_PROCESS	GO_VITAMIN_METABOLIC_PROCESS		131	-0.356406	-1.33846	0.0979592	0.269904	0.999	11479	tags=33%, list=21%, signal=41%
GO_AMINE_METABOLIC_PROCESS	GO_AMINE_METABOLIC_PROCESS		139	-0.386744	-1.33833	0.129707	0.269634	0.999	11958	tags=34%, list=22%, signal=43%
GO_SPROUTING_ANGIOGENESIS	GO_SPROUTING_ANGIOGENESIS		174	-0.355842	-1.33823	0.162887	0.269292	0.999	9778	tags=27%, list=18%, signal=33%
GO_POSITIVE_REGULATION_OF_SMOOTHENED_SIGNALING_PATHWAY	GO_POSITIVE_REGULATION_OF_SMOOTHENED_SIGNALING_PATHWAY		38	-0.438891	-1.33789	0.116279	0.269238	0.999	8434	tags=39%, list=15%, signal=47%
GO_GLUCOSE_6_PHOSPHATE_METABOLIC_PROCESS	GO_GLUCOSE_6_PHOSPHATE_METABOLIC_PROCESS		26	-0.453568	-1.33777	0.149688	0.268931	0.999	6518	tags=31%, list=12%, signal=35%
GO_CELL_MATURATION	GO_CELL_MATURATION		179	-0.338947	-1.33664	0.0932755	0.269839	0.999	5082	tags=21%, list=9%, signal=23%
GO_PROTEIN_LOCALIZATION_TO_MITOCHONDRION	GO_PROTEIN_LOCALIZATION_TO_MITOCHONDRION		144	-0.374367	-1.33605	0.143145	0.270077	0.999	11980	tags=42%, list=22%, signal=54%
GO_TOR_SIGNALING	GO_TOR_SIGNALING		123	-0.366182	-1.3359	0.124236	0.269803	0.999	11881	tags=37%, list=21%, signal=46%
GO_EMBRYO_IMPLANTATION	GO_EMBRYO_IMPLANTATION		57	-0.379394	-1.33581	0.10978	0.269443	0.999	6640	tags=25%, list=12%, signal=28%
GO_PIGMENTATION	GO_PIGMENTATION		99	-0.369461	-1.33552	0.123142	0.269407	0.999	7272	tags=26%, list=13%, signal=30%
GO_NEGATIVE_REGULATION_OF_INTRACELLULAR_TRANSPORT	GO_NEGATIVE_REGULATION_OF_INTRACELLULAR_TRANSPORT		58	-0.38342	-1.33484	0.109474	0.269835	0.999	9361	tags=33%, list=17%, signal=39%
GO_POSITIVE_REGULATION_OF_LIPID_BIOSYNTHETIC_PROCESS	GO_POSITIVE_REGULATION_OF_LIPID_BIOSYNTHETIC_PROCESS		86	-0.354471	-1.33409	0.104822	0.270357	0.999	9349	tags=29%, list=17%, signal=35%
GO_NEGATIVE_REGULATION_OF_LIPID_CATABOLIC_PROCESS	GO_NEGATIVE_REGULATION_OF_LIPID_CATABOLIC_PROCESS		24	-0.445256	-1.33313	0.119284	0.271081	0.999	2209	tags=13%, list=4%, signal=13%
GO_POSITIVE_REGULATION_OF_EPITHELIAL_CELL_APOPTOTIC_PROCESS	GO_POSITIVE_REGULATION_OF_EPITHELIAL_CELL_APOPTOTIC_PROCESS		39	-0.404057	-1.33305	0.107438	0.270738	0.999	5730	tags=21%, list=10%, signal=23%
GO_REGULATION_OF_SYNAPTIC_VESICLE_CYCLE	GO_REGULATION_OF_SYNAPTIC_VESICLE_CYCLE		114	-0.37113	-1.33299	0.130621	0.270365	0.999	8867	tags=32%, list=16%, signal=39%
GO_DIENCEPHALON_DEVELOPMENT	GO_DIENCEPHALON_DEVELOPMENT		74	-0.388895	-1.33263	0.0967742	0.270393	0.999	9673	tags=26%, list=17%, signal=31%
GO_RESPONSE_TO_ARSENIC_CONTAINING_SUBSTANCE	GO_RESPONSE_TO_ARSENIC_CONTAINING_SUBSTANCE		34	-0.420902	-1.33227	0.12731	0.270381	0.999	11479	tags=44%, list=21%, signal=56%
GO_NEUTRAL_LIPID_BIOSYNTHETIC_PROCESS	GO_NEUTRAL_LIPID_BIOSYNTHETIC_PROCESS		49	-0.377532	-1.33227	0.0969072	0.269931	0.999	7554	tags=31%, list=14%, signal=35%
GO_LIPID_DROPLET_ORGANIZATION	GO_LIPID_DROPLET_ORGANIZATION		27	-0.437588	-1.33171	0.137577	0.270243	0.999	11359	tags=48%, list=20%, signal=61%
GO_CARDIAC_ATRIUM_DEVELOPMENT	GO_CARDIAC_ATRIUM_DEVELOPMENT		36	-0.422533	-1.33171	0.116773	0.269797	0.999	7832	tags=39%, list=14%, signal=45%
GO_REGULATION_OF_G_PROTEIN_COUPLED_RECEPTOR_SIGNALING_PATHWAY	GO_REGULATION_OF_G_PROTEIN_COUPLED_RECEPTOR_SIGNALING_PATHWAY		144	-0.341733	-1.33056	0.111579	0.270724	0.999	10795	tags=31%, list=19%, signal=38%
GO_SMOOTH_MUSCLE_CONTRACTION	GO_SMOOTH_MUSCLE_CONTRACTION		107	-0.368474	-1.33022	0.123967	0.270683	0.999	8294	tags=27%, list=15%, signal=32%
GO_REGULATION_OF_CELLULAR_RESPIRATION	GO_REGULATION_OF_CELLULAR_RESPIRATION		30	-0.438229	-1.32983	0.132075	0.270727	0.999	8352	tags=27%, list=15%, signal=31%
GO_MRNA_SPLICE_SITE_SELECTION	GO_MRNA_SPLICE_SITE_SELECTION		52	-0.438186	-1.32937	0.165323	0.270896	0.999	13979	tags=52%, list=25%, signal=69%
GO_GLUTATHIONE_METABOLIC_PROCESS	GO_GLUTATHIONE_METABOLIC_PROCESS		53	-0.415116	-1.32844	0.136082	0.271636	0.999	6837	tags=30%, list=12%, signal=34%
GO_MATERNAL_PLACENTA_DEVELOPMENT	GO_MATERNAL_PLACENTA_DEVELOPMENT		36	-0.392231	-1.32835	0.0925553	0.271321	0.999	9349	tags=31%, list=17%, signal=37%
GO_REGULATION_OF_SODIUM_ION_TRANSPORT	GO_REGULATION_OF_SODIUM_ION_TRANSPORT		88	-0.359819	-1.32823	0.109474	0.271009	0.999	5506	tags=19%, list=10%, signal=21%
GO_SYNAPTIC_TRANSMISSION_GLUTAMATERGIC	GO_SYNAPTIC_TRANSMISSION_GLUTAMATERGIC		95	-0.359866	-1.32772	0.108974	0.271162	0.999	13055	tags=36%, list=24%, signal=47%
GO_GLUCOSE_IMPORT	GO_GLUCOSE_IMPORT		73	-0.37255	-1.32771	0.10387	0.270731	0.999	14382	tags=41%, list=26%, signal=55%
GO_STEROID_HORMONE_SECRETION	GO_STEROID_HORMONE_SECRETION		21	-0.448043	-1.32693	0.112936	0.271325	0.999	1792	tags=19%, list=3%, signal=20%
GO_REGULATION_OF_CARDIAC_CONDUCTION	GO_REGULATION_OF_CARDIAC_CONDUCTION		71	-0.380371	-1.32619	0.0989247	0.271778	0.999	4167	tags=21%, list=8%, signal=23%
GO_NEUROTRANSMITTER_SECRETION	GO_NEUROTRANSMITTER_SECRETION		175	-0.341186	-1.32617	0.0924731	0.271371	0.999	11962	tags=37%, list=22%, signal=46%
GO_POLYSACCHARIDE_METABOLIC_PROCESS	GO_POLYSACCHARIDE_METABOLIC_PROCESS		112	-0.358853	-1.32495	0.101293	0.27249	0.999	9349	tags=32%, list=17%, signal=39%
GO_DIOL_METABOLIC_PROCESS	GO_DIOL_METABOLIC_PROCESS		28	-0.450881	-1.32481	0.131915	0.272223	0.999	10563	tags=39%, list=19%, signal=49%
GO_REGULATION_OF_GLUCAN_BIOSYNTHETIC_PROCESS	GO_REGULATION_OF_GLUCAN_BIOSYNTHETIC_PROCESS		30	-0.416293	-1.32459	0.0950495	0.27203	0.999	9349	tags=33%, list=17%, signal=40%
GO_NEGATIVE_REGULATION_OF_INTRACELLULAR_STEROID_HORMONE_RECEPTOR_SIGNALING_PATHWAY	GO_NEGATIVE_REGULATION_OF_INTRACELLULAR_STEROID_HORMONE_RECEPTOR_SIGNALING_PATHWAY		35	-0.427684	-1.32443	0.138211	0.271776	0.999	6970	tags=26%, list=13%, signal=29%
GO_RESPIRATORY_SYSTEM_PROCESS	GO_RESPIRATORY_SYSTEM_PROCESS		32	-0.4221	-1.32332	0.123431	0.272744	0.999	8220	tags=31%, list=15%, signal=37%
GO_POSITIVE_REGULATION_OF_NEUROTRANSMITTER_SECRETION	GO_POSITIVE_REGULATION_OF_NEUROTRANSMITTER_SECRETION		23	-0.42251	-1.32326	0.115702	0.272377	0.999	8867	tags=35%, list=16%, signal=41%
GO_REGULATION_OF_PROTEIN_DEACETYLATION	GO_REGULATION_OF_PROTEIN_DEACETYLATION		45	-0.411418	-1.32314	0.148728	0.27209	0.999	8760	tags=36%, list=16%, signal=42%
GO_POSITIVE_REGULATION_OF_ATPASE_ACTIVITY	GO_POSITIVE_REGULATION_OF_ATPASE_ACTIVITY		55	-0.394973	-1.32261	0.129707	0.272317	0.999	10259	tags=33%, list=18%, signal=40%
GO_MAINTENANCE_OF_PROTEIN_LOCALIZATION_IN_ORGANELLE	GO_MAINTENANCE_OF_PROTEIN_LOCALIZATION_IN_ORGANELLE		42	-0.407875	-1.3226	0.146497	0.271891	0.999	9349	tags=33%, list=17%, signal=40%
GO_POLYOL_METABOLIC_PROCESS	GO_POLYOL_METABOLIC_PROCESS		132	-0.344242	-1.32238	0.0879346	0.271725	0.999	10887	tags=33%, list=20%, signal=41%
GO_NEGATIVE_REGULATION_OF_MITOCHONDRION_ORGANIZATION	GO_NEGATIVE_REGULATION_OF_MITOCHONDRION_ORGANIZATION		60	-0.38605	-1.32181	0.133475	0.272023	0.999	9349	tags=35%, list=17%, signal=42%
GO_NEGATIVE_REGULATION_OF_STRESS_ACTIVATED_PROTEIN_KINASE_SIGNALING_CASCADE	GO_NEGATIVE_REGULATION_OF_STRESS_ACTIVATED_PROTEIN_KINASE_SIGNALING_CASCADE		48	-0.406039	-1.32157	0.133475	0.271855	0.999	12079	tags=42%, list=22%, signal=53%
GO_HIPPOCAMPUS_DEVELOPMENT	GO_HIPPOCAMPUS_DEVELOPMENT		81	-0.364035	-1.31955	0.0951374	0.274081	0.999	9559	tags=32%, list=17%, signal=39%
GO_PITUITARY_GLAND_DEVELOPMENT	GO_PITUITARY_GLAND_DEVELOPMENT		42	-0.410941	-1.31924	0.133621	0.274031	0.999	9673	tags=26%, list=17%, signal=32%
GO_EMBRYONIC_PATTERN_SPECIFICATION	GO_EMBRYONIC_PATTERN_SPECIFICATION		70	-0.385081	-1.31894	0.12854	0.274001	0.999	12783	tags=40%, list=23%, signal=52%
GO_NEGATIVE_REGULATION_OF_NEURAL_PRECURSOR_CELL_PROLIFERATION	GO_NEGATIVE_REGULATION_OF_NEURAL_PRECURSOR_CELL_PROLIFERATION		22	-0.460716	-1.31868	0.140725	0.273863	0.999	6835	tags=41%, list=12%, signal=47%
GO_TRABECULA_FORMATION	GO_TRABECULA_FORMATION		26	-0.473182	-1.31829	0.147609	0.273907	0.999	12210	tags=46%, list=22%, signal=59%
GO_DEFINITIVE_HEMOPOIESIS	GO_DEFINITIVE_HEMOPOIESIS		21	-0.482682	-1.31777	0.140167	0.274186	0.999	8659	tags=43%, list=16%, signal=51%
GO_AMINO_ACID_TRANSPORT	GO_AMINO_ACID_TRANSPORT		156	-0.327268	-1.31776	0.0921569	0.27376	0.999	8312	tags=28%, list=15%, signal=32%
GO_REGULATION_OF_LIPID_LOCALIZATION	GO_REGULATION_OF_LIPID_LOCALIZATION		164	-0.324108	-1.31698	0.0976645	0.274338	0.999	4912	tags=17%, list=9%, signal=19%
GO_STEROL_TRANSPORT	GO_STEROL_TRANSPORT		113	-0.337999	-1.31682	0.0909091	0.274109	0.999	10368	tags=32%, list=19%, signal=39%
GO_POSITIVE_REGULATION_OF_MEIOTIC_CELL_CYCLE	GO_POSITIVE_REGULATION_OF_MEIOTIC_CELL_CYCLE		24	-0.422011	-1.31592	0.137931	0.274808	0.999	13927	tags=54%, list=25%, signal=72%
GO_CELLULAR_RESPONSE_TO_VASCULAR_ENDOTHELIAL_GROWTH_FACTOR_STIMULUS	GO_CELLULAR_RESPONSE_TO_VASCULAR_ENDOTHELIAL_GROWTH_FACTOR_STIMULUS		72	-0.382021	-1.31546	0.158333	0.274982	1	6672	tags=26%, list=12%, signal=30%
GO_POSITIVE_REGULATION_OF_REPRODUCTIVE_PROCESS	GO_POSITIVE_REGULATION_OF_REPRODUCTIVE_PROCESS		83	-0.344549	-1.31514	0.100418	0.274974	1	6893	tags=27%, list=12%, signal=30%
GO_OUTFLOW_TRACT_MORPHOGENESIS	GO_OUTFLOW_TRACT_MORPHOGENESIS		78	-0.400722	-1.31488	0.138528	0.274888	1	10464	tags=38%, list=19%, signal=47%
GO_HINDBRAIN_DEVELOPMENT	GO_HINDBRAIN_DEVELOPMENT		156	-0.356224	-1.31487	0.103297	0.274466	1	9433	tags=29%, list=17%, signal=35%
GO_GAS_TRANSPORT	GO_GAS_TRANSPORT		20	-0.527396	-1.31413	0.17	0.274941	1	12538	tags=45%, list=23%, signal=58%
GO_POSITIVE_REGULATION_OF_KIDNEY_DEVELOPMENT	GO_POSITIVE_REGULATION_OF_KIDNEY_DEVELOPMENT		40	-0.41584	-1.31388	0.10664	0.274843	1	5291	tags=23%, list=10%, signal=25%
GO_CARDIOCYTE_DIFFERENTIATION	GO_CARDIOCYTE_DIFFERENTIATION		147	-0.366123	-1.31268	0.114165	0.275966	1	10464	tags=31%, list=19%, signal=38%
GO_NEGATIVE_REGULATION_OF_TOR_SIGNALING	GO_NEGATIVE_REGULATION_OF_TOR_SIGNALING		45	-0.391349	-1.3119	0.190476	0.276602	1	11881	tags=44%, list=21%, signal=57%
GO_REGULATION_OF_ASTROCYTE_DIFFERENTIATION	GO_REGULATION_OF_ASTROCYTE_DIFFERENTIATION		30	-0.425681	-1.31115	0.13924	0.27712	1	6009	tags=23%, list=11%, signal=26%
GO_ETHER_METABOLIC_PROCESS	GO_ETHER_METABOLIC_PROCESS		26	-0.400408	-1.31113	0.108787	0.276736	1	7527	tags=42%, list=14%, signal=49%
GO_SYNAPTIC_VESICLE_EXOCYTOSIS	GO_SYNAPTIC_VESICLE_EXOCYTOSIS		121	-0.35493	-1.31095	0.108742	0.276539	1	11962	tags=38%, list=22%, signal=48%
GO_PEPTIDYL_CYSTEINE_MODIFICATION	GO_PEPTIDYL_CYSTEINE_MODIFICATION		49	-0.382503	-1.31085	0.110619	0.276254	1	8586	tags=35%, list=15%, signal=41%
GO_CARDIAC_MUSCLE_TISSUE_MORPHOGENESIS	GO_CARDIAC_MUSCLE_TISSUE_MORPHOGENESIS		62	-0.438041	-1.31021	0.171657	0.276599	1	7832	tags=29%, list=14%, signal=34%
GO_NEGATIVE_REGULATION_OF_BLOOD_PRESSURE	GO_NEGATIVE_REGULATION_OF_BLOOD_PRESSURE		46	-0.383544	-1.30898	0.12043	0.277835	1	11822	tags=33%, list=21%, signal=41%
GO_REGULATION_OF_ENDOPLASMIC_RETICULUM_STRESS_INDUCED_INTRINSIC_APOPTOTIC_SIGNALING_PATHWAY	GO_REGULATION_OF_ENDOPLASMIC_RETICULUM_STRESS_INDUCED_INTRINSIC_APOPTOTIC_SIGNALING_PATHWAY		32	-0.448005	-1.30875	0.155136	0.277723	1	8011	tags=38%, list=14%, signal=44%
GO_REGULATION_OF_ATPASE_ACTIVITY	GO_REGULATION_OF_ATPASE_ACTIVITY		79	-0.369648	-1.30867	0.133333	0.277413	1	10259	tags=33%, list=18%, signal=40%
GO_NEGATIVE_REGULATION_OF_BLOOD_VESSEL_DIAMETER	GO_NEGATIVE_REGULATION_OF_BLOOD_VESSEL_DIAMETER		83	-0.373908	-1.30866	0.108333	0.277002	1	9652	tags=30%, list=17%, signal=36%
GO_POSITIVE_REGULATION_OF_DENDRITE_MORPHOGENESIS	GO_POSITIVE_REGULATION_OF_DENDRITE_MORPHOGENESIS		39	-0.439137	-1.30834	0.187368	0.277015	1	8847	tags=44%, list=16%, signal=52%
GO_METANEPHRIC_EPITHELIUM_DEVELOPMENT	GO_METANEPHRIC_EPITHELIUM_DEVELOPMENT		27	-0.428409	-1.30825	0.121649	0.276695	1	4486	tags=22%, list=8%, signal=24%
GO_POSITIVE_REGULATION_OF_NUCLEOTIDE_METABOLIC_PROCESS	GO_POSITIVE_REGULATION_OF_NUCLEOTIDE_METABOLIC_PROCESS		49	-0.375186	-1.30771	0.103226	0.276958	1	3750	tags=18%, list=7%, signal=20%
GO_PHOSPHATIDYLINOSITOL_METABOLIC_PROCESS	GO_PHOSPHATIDYLINOSITOL_METABOLIC_PROCESS		185	-0.359603	-1.30694	0.15	0.277464	1	9958	tags=31%, list=18%, signal=37%
GO_PROTEIN_K11_LINKED_UBIQUITINATION	GO_PROTEIN_K11_LINKED_UBIQUITINATION		29	-0.436278	-1.30604	0.173824	0.27819	1	12146	tags=45%, list=22%, signal=57%
GO_MYOBLAST_DIFFERENTIATION	GO_MYOBLAST_DIFFERENTIATION		86	-0.370695	-1.30456	0.137577	0.279688	1	10452	tags=33%, list=19%, signal=40%
GO_CATECHOLAMINE_SECRETION	GO_CATECHOLAMINE_SECRETION		57	-0.375264	-1.30278	0.127572	0.281569	1	8418	tags=28%, list=15%, signal=33%
GO_NEGATIVE_REGULATION_OF_OXIDOREDUCTASE_ACTIVITY	GO_NEGATIVE_REGULATION_OF_OXIDOREDUCTASE_ACTIVITY		39	-0.374214	-1.30273	0.0947581	0.281186	1	6210	tags=21%, list=11%, signal=23%
GO_PEPTIDYL_LYSINE_DIMETHYLATION	GO_PEPTIDYL_LYSINE_DIMETHYLATION		23	-0.480102	-1.30266	0.194389	0.280848	1	12770	tags=48%, list=23%, signal=62%
GO_L_AMINO_ACID_TRANSPORT	GO_L_AMINO_ACID_TRANSPORT		73	-0.36939	-1.30175	0.128968	0.281561	1	8145	tags=25%, list=15%, signal=29%
GO_CELL_DIFFERENTIATION_INVOLVED_IN_METANEPHROS_DEVELOPMENT	GO_CELL_DIFFERENTIATION_INVOLVED_IN_METANEPHROS_DEVELOPMENT		26	-0.432864	-1.30157	0.126733	0.281371	1	4486	tags=27%, list=8%, signal=29%
GO_REGULATION_OF_TRANSLATIONAL_INITIATION	GO_REGULATION_OF_TRANSLATIONAL_INITIATION		79	-0.41917	-1.30137	0.209256	0.28119	1	10849	tags=37%, list=20%, signal=46%
GO_NUCLEOTIDE_SUGAR_METABOLIC_PROCESS	GO_NUCLEOTIDE_SUGAR_METABOLIC_PROCESS		38	-0.431388	-1.30099	0.164969	0.281271	1	9730	tags=42%, list=18%, signal=51%
GO_RESPONSE_TO_PURINE_CONTAINING_COMPOUND	GO_RESPONSE_TO_PURINE_CONTAINING_COMPOUND		149	-0.340606	-1.30092	0.130719	0.280926	1	6640	tags=23%, list=12%, signal=27%
GO_RESPONSE_TO_DIETARY_EXCESS	GO_RESPONSE_TO_DIETARY_EXCESS		27	-0.411269	-1.30091	0.106157	0.280516	1	10203	tags=26%, list=18%, signal=32%
GO_POSITIVE_REGULATION_OF_ION_TRANSMEMBRANE_TRANSPORT	GO_POSITIVE_REGULATION_OF_ION_TRANSMEMBRANE_TRANSPORT		159	-0.334212	-1.30054	0.103376	0.280599	1	10836	tags=33%, list=20%, signal=41%
GO_MESENCHYMAL_CELL_PROLIFERATION	GO_MESENCHYMAL_CELL_PROLIFERATION		44	-0.429179	-1.30029	0.144869	0.280517	1	7786	tags=39%, list=14%, signal=45%
GO_RESPONSE_TO_LEAD_ION	GO_RESPONSE_TO_LEAD_ION		23	-0.457371	-1.29987	0.142857	0.280638	1	7555	tags=30%, list=14%, signal=35%
GO_POTASSIUM_ION_HOMEOSTASIS	GO_POTASSIUM_ION_HOMEOSTASIS		29	-0.42099	-1.29978	0.122622	0.280343	1	9029	tags=31%, list=16%, signal=37%
GO_MITOCHONDRIAL_CALCIUM_ION_HOMEOSTASIS	GO_MITOCHONDRIAL_CALCIUM_ION_HOMEOSTASIS		26	-0.421158	-1.29976	0.168067	0.279937	1	6420	tags=35%, list=12%, signal=39%
GO_CHAPERONE_MEDIATED_PROTEIN_FOLDING	GO_CHAPERONE_MEDIATED_PROTEIN_FOLDING		60	-0.385502	-1.29965	0.172414	0.279628	1	8871	tags=23%, list=16%, signal=28%
GO_DORSAL_VENTRAL_PATTERN_FORMATION	GO_DORSAL_VENTRAL_PATTERN_FORMATION		92	-0.361976	-1.29947	0.124473	0.279443	1	9559	tags=27%, list=17%, signal=33%
GO_MITOCHONDRIAL_TRANSLATIONAL_TERMINATION	GO_MITOCHONDRIAL_TRANSLATIONAL_TERMINATION		89	-0.530673	-1.29906	0.245902	0.279546	1	13340	tags=53%, list=24%, signal=69%
GO_MESENCHYME_MORPHOGENESIS	GO_MESENCHYME_MORPHOGENESIS		52	-0.413257	-1.29847	0.165272	0.279838	1	9559	tags=40%, list=17%, signal=49%
GO_REGULATION_OF_SYSTEMIC_ARTERIAL_BLOOD_PRESSURE_MEDIATED_BY_A_CHEMICAL_SIGNAL	GO_REGULATION_OF_SYSTEMIC_ARTERIAL_BLOOD_PRESSURE_MEDIATED_BY_A_CHEMICAL_SIGNAL		50	-0.393394	-1.29736	0.156057	0.280836	1	10203	tags=34%, list=18%, signal=42%
GO_REGULATION_OF_VASOCONSTRICTION	GO_REGULATION_OF_VASOCONSTRICTION		59	-0.387404	-1.29563	0.129167	0.282681	1	9652	tags=34%, list=17%, signal=41%
GO_NEGATIVE_REGULATION_OF_ESTABLISHMENT_OF_PROTEIN_LOCALIZATION	GO_NEGATIVE_REGULATION_OF_ESTABLISHMENT_OF_PROTEIN_LOCALIZATION		167	-0.321552	-1.2956	0.116424	0.282296	1	9951	tags=29%, list=18%, signal=35%
GO_CORONARY_VASCULATURE_DEVELOPMENT	GO_CORONARY_VASCULATURE_DEVELOPMENT		50	-0.422797	-1.29486	0.171488	0.282855	1	8760	tags=38%, list=16%, signal=45%
GO_PROTEIN_METHYLATION	GO_PROTEIN_METHYLATION		183	-0.38598	-1.29436	0.191147	0.283064	1	14055	tags=40%, list=25%, signal=54%
GO_POSITIVE_REGULATION_OF_UBIQUITIN_PROTEIN_TRANSFERASE_ACTIVITY	GO_POSITIVE_REGULATION_OF_UBIQUITIN_PROTEIN_TRANSFERASE_ACTIVITY		35	-0.426988	-1.29393	0.158458	0.283216	1	11752	tags=37%, list=21%, signal=47%
GO_CARDIAC_VENTRICLE_MORPHOGENESIS	GO_CARDIAC_VENTRICLE_MORPHOGENESIS		73	-0.387548	-1.29378	0.143451	0.282979	1	7832	tags=30%, list=14%, signal=35%
GO_ACID_SECRETION	GO_ACID_SECRETION		43	-0.39033	-1.29366	0.147059	0.282721	1	13089	tags=30%, list=24%, signal=40%
GO_POSITIVE_REGULATION_OF_CHONDROCYTE_DIFFERENTIATION	GO_POSITIVE_REGULATION_OF_CHONDROCYTE_DIFFERENTIATION		20	-0.457315	-1.29337	0.162325	0.282641	1	8515	tags=35%, list=15%, signal=41%
GO_MITOCHONDRION_MORPHOGENESIS	GO_MITOCHONDRION_MORPHOGENESIS		23	-0.431192	-1.29252	0.162393	0.283327	1	8140	tags=43%, list=15%, signal=51%
GO_SULFUR_AMINO_ACID_METABOLIC_PROCESS	GO_SULFUR_AMINO_ACID_METABOLIC_PROCESS		40	-0.394821	-1.29246	0.130165	0.283002	1	8913	tags=30%, list=16%, signal=36%
GO_REGULATION_OF_NEUROTRANSMITTER_TRANSPORT	GO_REGULATION_OF_NEUROTRANSMITTER_TRANSPORT		120	-0.344751	-1.29222	0.128821	0.282901	1	8867	tags=31%, list=16%, signal=37%
GO_ENERGY_HOMEOSTASIS	GO_ENERGY_HOMEOSTASIS		35	-0.413678	-1.29123	0.140389	0.28369	1	9113	tags=34%, list=16%, signal=41%
GO_IMPORT_ACROSS_PLASMA_MEMBRANE	GO_IMPORT_ACROSS_PLASMA_MEMBRANE		157	-0.325739	-1.29098	0.112033	0.283584	1	10486	tags=31%, list=19%, signal=38%
GO_PROTEIN_TARGETING_TO_MITOCHONDRION	GO_PROTEIN_TARGETING_TO_MITOCHONDRION		99	-0.383211	-1.29076	0.184676	0.283447	1	12790	tags=44%, list=23%, signal=58%
GO_INTRACELLULAR_STEROID_HORMONE_RECEPTOR_SIGNALING_PATHWAY	GO_INTRACELLULAR_STEROID_HORMONE_RECEPTOR_SIGNALING_PATHWAY		116	-0.369372	-1.29014	0.155136	0.283867	1	9088	tags=28%, list=16%, signal=34%
GO_NADP_METABOLIC_PROCESS	GO_NADP_METABOLIC_PROCESS		35	-0.412481	-1.28994	0.159091	0.283731	1	6518	tags=29%, list=12%, signal=32%
GO_REGULATION_OF_SYSTEMIC_ARTERIAL_BLOOD_PRESSURE	GO_REGULATION_OF_SYSTEMIC_ARTERIAL_BLOOD_PRESSURE		94	-0.358231	-1.28973	0.125786	0.283586	1	7784	tags=26%, list=14%, signal=30%
GO_REGULATION_OF_RELEASE_OF_SEQUESTERED_CALCIUM_ION_INTO_CYTOSOL	GO_REGULATION_OF_RELEASE_OF_SEQUESTERED_CALCIUM_ION_INTO_CYTOSOL		78	-0.362862	-1.28907	0.146751	0.284027	1	10836	tags=36%, list=20%, signal=45%
GO_CELL_MIGRATION_INVOLVED_IN_SPROUTING_ANGIOGENESIS	GO_CELL_MIGRATION_INVOLVED_IN_SPROUTING_ANGIOGENESIS		92	-0.364105	-1.28904	0.175153	0.283642	1	6607	tags=20%, list=12%, signal=22%
GO_LIMBIC_SYSTEM_DEVELOPMENT	GO_LIMBIC_SYSTEM_DEVELOPMENT		109	-0.344008	-1.28899	0.105708	0.283318	1	9559	tags=29%, list=17%, signal=35%
GO_ENDOCARDIAL_CUSHION_MORPHOGENESIS	GO_ENDOCARDIAL_CUSHION_MORPHOGENESIS		35	-0.425432	-1.28846	0.17094	0.283628	1	7832	tags=40%, list=14%, signal=47%
GO_ENSHEATHMENT_OF_NEURONS	GO_ENSHEATHMENT_OF_NEURONS		139	-0.338728	-1.28785	0.130165	0.283988	1	5980	tags=24%, list=11%, signal=27%
GO_REGULATION_OF_STEM_CELL_POPULATION_MAINTENANCE	GO_REGULATION_OF_STEM_CELL_POPULATION_MAINTENANCE		34	-0.434155	-1.28775	0.169772	0.283689	1	6033	tags=21%, list=11%, signal=23%
GO_DNA_METHYLATION_INVOLVED_IN_GAMETE_GENERATION	GO_DNA_METHYLATION_INVOLVED_IN_GAMETE_GENERATION		20	-0.457851	-1.28759	0.151064	0.283457	1	6675	tags=30%, list=12%, signal=34%
GO_POSITIVE_REGULATION_OF_MEMBRANE_PERMEABILITY	GO_POSITIVE_REGULATION_OF_MEMBRANE_PERMEABILITY		63	-0.36592	-1.28746	0.160677	0.283228	1	6837	tags=29%, list=12%, signal=33%
GO_PYRIMIDINE_NUCLEOTIDE_BIOSYNTHETIC_PROCESS	GO_PYRIMIDINE_NUCLEOTIDE_BIOSYNTHETIC_PROCESS		31	-0.419872	-1.28701	0.166341	0.283402	1	7576	tags=32%, list=14%, signal=37%
GO_REGULATION_OF_POLYSACCHARIDE_METABOLIC_PROCESS	GO_REGULATION_OF_POLYSACCHARIDE_METABOLIC_PROCESS		44	-0.367616	-1.28558	0.104294	0.284829	1	9349	tags=32%, list=17%, signal=38%
GO_NEGATIVE_REGULATION_OF_SMOOTH_MUSCLE_CELL_MIGRATION	GO_NEGATIVE_REGULATION_OF_SMOOTH_MUSCLE_CELL_MIGRATION		30	-0.406587	-1.28515	0.133197	0.284922	1	6690	tags=20%, list=12%, signal=23%
GO_PEPTIDYL_L_CYSTEINE_S_PALMITOYLATION	GO_PEPTIDYL_L_CYSTEINE_S_PALMITOYLATION		23	-0.429776	-1.28417	0.162047	0.285714	1	8234	tags=43%, list=15%, signal=51%
GO_PHOSPHOLIPID_CATABOLIC_PROCESS	GO_PHOSPHOLIPID_CATABOLIC_PROCESS		49	-0.381168	-1.28412	0.150424	0.285367	1	12898	tags=41%, list=23%, signal=53%
GO_MESONEPHROS_DEVELOPMENT	GO_MESONEPHROS_DEVELOPMENT		103	-0.369282	-1.2834	0.117647	0.285893	1	10464	tags=33%, list=19%, signal=41%
GO_POLY_A_PLUS_MRNA_EXPORT_FROM_NUCLEUS	GO_POLY_A_PLUS_MRNA_EXPORT_FROM_NUCLEUS		21	-0.458826	-1.28302	0.184825	0.28595	1	18958	tags=52%, list=34%, signal=80%
GO_ACYLGLYCEROL_HOMEOSTASIS	GO_ACYLGLYCEROL_HOMEOSTASIS		38	-0.419193	-1.28302	0.144869	0.285548	1	7753	tags=32%, list=14%, signal=37%
GO_TRANSLATIONAL_TERMINATION	GO_TRANSLATIONAL_TERMINATION		105	-0.4924	-1.28285	0.247423	0.285389	1	13340	tags=49%, list=24%, signal=64%
GO_CELL_DIFFERENTIATION_IN_SPINAL_CORD	GO_CELL_DIFFERENTIATION_IN_SPINAL_CORD		57	-0.388979	-1.28266	0.108974	0.285266	1	11298	tags=37%, list=20%, signal=46%
GO_POSITIVE_REGULATION_OF_HEART_GROWTH	GO_POSITIVE_REGULATION_OF_HEART_GROWTH		49	-0.374867	-1.28263	0.148225	0.284912	1	9696	tags=29%, list=17%, signal=35%
GO_REGULATION_OF_AUTOPHAGOSOME_ASSEMBLY	GO_REGULATION_OF_AUTOPHAGOSOME_ASSEMBLY		37	-0.426747	-1.28198	0.198347	0.285307	1	14166	tags=43%, list=26%, signal=58%
GO_EMBRYONIC_EYE_MORPHOGENESIS	GO_EMBRYONIC_EYE_MORPHOGENESIS		37	-0.420764	-1.28039	0.188017	0.286986	1	9088	tags=41%, list=16%, signal=48%
GO_ENTEROENDOCRINE_CELL_DIFFERENTIATION	GO_ENTEROENDOCRINE_CELL_DIFFERENTIATION		27	-0.418928	-1.28035	0.138655	0.286626	1	7395	tags=33%, list=13%, signal=38%
GO_EPITHELIAL_STRUCTURE_MAINTENANCE	GO_EPITHELIAL_STRUCTURE_MAINTENANCE		28	-0.419508	-1.28015	0.144628	0.286476	1	5080	tags=25%, list=9%, signal=28%
GO_CARDIAC_VENTRICLE_DEVELOPMENT	GO_CARDIAC_VENTRICLE_DEVELOPMENT		129	-0.371994	-1.27982	0.161426	0.286479	1	7274	tags=27%, list=13%, signal=31%
GO_BLOOD_VESSEL_ENDOTHELIAL_CELL_MIGRATION	GO_BLOOD_VESSEL_ENDOTHELIAL_CELL_MIGRATION		170	-0.338173	-1.27969	0.161491	0.286229	1	7764	tags=24%, list=14%, signal=27%
GO_REGULATION_OF_UBIQUITIN_PROTEIN_LIGASE_ACTIVITY	GO_REGULATION_OF_UBIQUITIN_PROTEIN_LIGASE_ACTIVITY		24	-0.461075	-1.27946	0.186373	0.286108	1	10758	tags=33%, list=19%, signal=41%
GO_CARBOHYDRATE_CATABOLIC_PROCESS	GO_CARBOHYDRATE_CATABOLIC_PROCESS		200	-0.336536	-1.27931	0.170886	0.285922	1	6911	tags=24%, list=12%, signal=27%
GO_MICROTUBULE_POLYMERIZATION_OR_DEPOLYMERIZATION	GO_MICROTUBULE_POLYMERIZATION_OR_DEPOLYMERIZATION		117	-0.361676	-1.27919	0.176707	0.285682	1	10223	tags=32%, list=18%, signal=39%
GO_REGULATION_OF_URINE_VOLUME	GO_REGULATION_OF_URINE_VOLUME		22	-0.441267	-1.27839	0.171548	0.286282	1	5847	tags=27%, list=11%, signal=30%
GO_SYNAPTIC_TRANSMISSION_DOPAMINERGIC	GO_SYNAPTIC_TRANSMISSION_DOPAMINERGIC		27	-0.423135	-1.27776	0.141649	0.286647	1	8867	tags=41%, list=16%, signal=48%
GO_NEGATIVE_REGULATION_OF_CATION_CHANNEL_ACTIVITY	GO_NEGATIVE_REGULATION_OF_CATION_CHANNEL_ACTIVITY		49	-0.364376	-1.27756	0.157676	0.286508	1	10836	tags=31%, list=20%, signal=38%
GO_LIPID_PHOSPHORYLATION	GO_LIPID_PHOSPHORYLATION		72	-0.391948	-1.27739	0.176349	0.286306	1	8172	tags=31%, list=15%, signal=36%
GO_CARDIAC_SEPTUM_DEVELOPMENT	GO_CARDIAC_SEPTUM_DEVELOPMENT		112	-0.374691	-1.27679	0.171779	0.286687	1	10464	tags=38%, list=19%, signal=46%
GO_POSITIVE_REGULATION_OF_CALCIUM_ION_TRANSMEMBRANE_TRANSPORTER_ACTIVITY	GO_POSITIVE_REGULATION_OF_CALCIUM_ION_TRANSMEMBRANE_TRANSPORTER_ACTIVITY		39	-0.396208	-1.27659	0.157113	0.286551	1	10589	tags=44%, list=19%, signal=54%
GO_HETEROCHROMATIN_ORGANIZATION	GO_HETEROCHROMATIN_ORGANIZATION		78	-0.393775	-1.27598	0.179283	0.286929	1	9263	tags=35%, list=17%, signal=41%
GO_ENDOTHELIAL_CELL_PROLIFERATION	GO_ENDOTHELIAL_CELL_PROLIFERATION		184	-0.324439	-1.2736	0.146341	0.289522	1	9778	tags=27%, list=18%, signal=32%
GO_CARBOHYDRATE_TRANSPORT	GO_CARBOHYDRATE_TRANSPORT		149	-0.32878	-1.27351	0.140496	0.28926	1	9539	tags=27%, list=17%, signal=32%
GO_HAIR_CELL_DIFFERENTIATION	GO_HAIR_CELL_DIFFERENTIATION		45	-0.369604	-1.27331	0.144898	0.289117	1	8109	tags=29%, list=15%, signal=34%
GO_NUCLEOTIDE_PHOSPHORYLATION	GO_NUCLEOTIDE_PHOSPHORYLATION		135	-0.342865	-1.27328	0.175	0.288754	1	7884	tags=24%, list=14%, signal=28%
GO_REGULATION_OF_CALCIUM_ION_DEPENDENT_EXOCYTOSIS	GO_REGULATION_OF_CALCIUM_ION_DEPENDENT_EXOCYTOSIS		43	-0.376591	-1.27255	0.148594	0.289319	1	11515	tags=44%, list=21%, signal=56%
GO_POSITIVE_REGULATION_OF_DEVELOPMENTAL_GROWTH	GO_POSITIVE_REGULATION_OF_DEVELOPMENTAL_GROWTH		184	-0.33189	-1.27216	0.154167	0.289418	1	9809	tags=29%, list=18%, signal=35%
GO_ER_NUCLEUS_SIGNALING_PATHWAY	GO_ER_NUCLEUS_SIGNALING_PATHWAY		51	-0.43794	-1.27144	0.214567	0.289958	1	5338	tags=24%, list=10%, signal=26%
GO_REGULATION_OF_VESICLE_FUSION	GO_REGULATION_OF_VESICLE_FUSION		31	-0.379337	-1.27113	0.141732	0.28998	1	6210	tags=32%, list=11%, signal=36%
GO_PROTEIN_PALMITOYLATION	GO_PROTEIN_PALMITOYLATION		36	-0.396988	-1.27045	0.154506	0.290442	1	8234	tags=39%, list=15%, signal=46%
GO_REGULATION_OF_DIGESTIVE_SYSTEM_PROCESS	GO_REGULATION_OF_DIGESTIVE_SYSTEM_PROCESS		42	-0.373802	-1.26979	0.12854	0.290903	1	8501	tags=21%, list=15%, signal=25%
GO_NEGATIVE_REGULATION_OF_POTASSIUM_ION_TRANSPORT	GO_NEGATIVE_REGULATION_OF_POTASSIUM_ION_TRANSPORT		38	-0.384841	-1.26885	0.144928	0.291659	1	4474	tags=18%, list=8%, signal=20%
GO_PURINE_NUCLEOSIDE_METABOLIC_PROCESS	GO_PURINE_NUCLEOSIDE_METABOLIC_PROCESS		61	-0.353552	-1.26825	0.155689	0.292018	1	10266	tags=34%, list=19%, signal=42%
GO_NEGATIVE_REGULATION_OF_ION_TRANSPORT	GO_NEGATIVE_REGULATION_OF_ION_TRANSPORT		152	-0.32734	-1.26752	0.106776	0.292585	1	10836	tags=28%, list=20%, signal=35%
GO_REGULATION_OF_MICROTUBULE_POLYMERIZATION_OR_DEPOLYMERIZATION	GO_REGULATION_OF_MICROTUBULE_POLYMERIZATION_OR_DEPOLYMERIZATION		85	-0.362966	-1.26593	0.196755	0.294202	1	6234	tags=24%, list=11%, signal=26%
GO_PYRUVATE_METABOLIC_PROCESS	GO_PYRUVATE_METABOLIC_PROCESS		152	-0.353497	-1.2658	0.182752	0.293953	1	6682	tags=23%, list=12%, signal=26%
GO_PROTEIN_HETEROOLIGOMERIZATION	GO_PROTEIN_HETEROOLIGOMERIZATION		22	-0.426958	-1.26557	0.157787	0.293889	1	3112	tags=23%, list=6%, signal=24%
GO_TRANSPORT_ALONG_MICROTUBULE	GO_TRANSPORT_ALONG_MICROTUBULE		161	-0.370768	-1.26513	0.189873	0.294037	1	8219	tags=31%, list=15%, signal=36%
GO_MRNA_MODIFICATION	GO_MRNA_MODIFICATION		24	-0.480505	-1.26405	0.227823	0.295055	1	11043	tags=33%, list=20%, signal=42%
GO_REGULATION_OF_CIRCADIAN_RHYTHM	GO_REGULATION_OF_CIRCADIAN_RHYTHM		122	-0.361288	-1.26388	0.169456	0.294894	1	14598	tags=43%, list=26%, signal=58%
GO_POSITIVE_REGULATION_OF_NEUROTRANSMITTER_TRANSPORT	GO_POSITIVE_REGULATION_OF_NEUROTRANSMITTER_TRANSPORT		28	-0.390419	-1.26365	0.16453	0.294807	1	8867	tags=32%, list=16%, signal=38%
GO_OUTFLOW_TRACT_SEPTUM_MORPHOGENESIS	GO_OUTFLOW_TRACT_SEPTUM_MORPHOGENESIS		27	-0.428958	-1.26356	0.201699	0.294547	1	10464	tags=41%, list=19%, signal=50%
GO_HEART_GROWTH	GO_HEART_GROWTH		108	-0.34984	-1.26349	0.186837	0.294232	1	12503	tags=31%, list=23%, signal=41%
GO_CARBOHYDRATE_PHOSPHORYLATION	GO_CARBOHYDRATE_PHOSPHORYLATION		24	-0.438466	-1.26323	0.186858	0.294183	1	7242	tags=33%, list=13%, signal=38%
GO_BODY_FLUID_SECRETION	GO_BODY_FLUID_SECRETION		95	-0.321068	-1.26293	0.118896	0.294167	1	5993	tags=22%, list=11%, signal=25%
GO_MACROMOLECULE_DEACYLATION	GO_MACROMOLECULE_DEACYLATION		111	-0.383244	-1.26203	0.207661	0.295019	1	8760	tags=31%, list=16%, signal=36%
GO_SYNAPTIC_TRANSMISSION_CHOLINERGIC	GO_SYNAPTIC_TRANSMISSION_CHOLINERGIC		30	-0.430494	-1.26193	0.172131	0.294755	1	9374	tags=33%, list=17%, signal=40%
GO_METENCEPHALON_DEVELOPMENT	GO_METENCEPHALON_DEVELOPMENT		114	-0.34653	-1.26181	0.157328	0.29451	1	9118	tags=28%, list=16%, signal=34%
GO_AORTA_MORPHOGENESIS	GO_AORTA_MORPHOGENESIS		31	-0.42837	-1.26126	0.197505	0.294743	1	10264	tags=42%, list=19%, signal=51%
GO_TERPENOID_METABOLIC_PROCESS	GO_TERPENOID_METABOLIC_PROCESS		124	-0.33422	-1.26115	0.122736	0.294496	1	7753	tags=23%, list=14%, signal=26%
GO_REGULATION_OF_LIPASE_ACTIVITY	GO_REGULATION_OF_LIPASE_ACTIVITY		101	-0.345295	-1.26074	0.158333	0.294624	1	8067	tags=27%, list=15%, signal=31%
GO_ERYTHROCYTE_HOMEOSTASIS	GO_ERYTHROCYTE_HOMEOSTASIS		129	-0.339878	-1.26069	0.163136	0.294307	1	7759	tags=26%, list=14%, signal=31%
GO_PROSTATE_GLAND_MORPHOGENESIS	GO_PROSTATE_GLAND_MORPHOGENESIS		28	-0.443652	-1.26063	0.206383	0.293995	1	4972	tags=25%, list=9%, signal=27%
GO_CAMERA_TYPE_EYE_MORPHOGENESIS	GO_CAMERA_TYPE_EYE_MORPHOGENESIS		125	-0.351478	-1.26055	0.15708	0.293704	1	9795	tags=31%, list=18%, signal=38%
GO_NEGATIVE_REGULATION_OF_ANION_TRANSPORT	GO_NEGATIVE_REGULATION_OF_ANION_TRANSPORT		31	-0.398124	-1.25775	0.170526	0.296961	1	6227	tags=26%, list=11%, signal=29%
GO_RETROGRADE_TRANSPORT_ENDOSOME_TO_GOLGI	GO_RETROGRADE_TRANSPORT_ENDOSOME_TO_GOLGI		92	-0.398289	-1.25771	0.224066	0.296604	1	10796	tags=39%, list=19%, signal=49%
GO_RNA_PHOSPHODIESTER_BOND_HYDROLYSIS_ENDONUCLEOLYTIC	GO_RNA_PHOSPHODIESTER_BOND_HYDROLYSIS_ENDONUCLEOLYTIC		82	-0.37161	-1.25764	0.202	0.296293	1	11226	tags=34%, list=20%, signal=43%
GO_POSITIVE_REGULATION_OF_OSTEOBLAST_DIFFERENTIATION	GO_POSITIVE_REGULATION_OF_OSTEOBLAST_DIFFERENTIATION		62	-0.366601	-1.25732	0.175732	0.296279	1	7646	tags=31%, list=14%, signal=36%
GO_EXOCYTIC_PROCESS	GO_EXOCYTIC_PROCESS		84	-0.342851	-1.25662	0.15261	0.29674	1	8493	tags=32%, list=15%, signal=38%
GO_NEGATIVE_REGULATION_OF_REPRODUCTIVE_PROCESS	GO_NEGATIVE_REGULATION_OF_REPRODUCTIVE_PROCESS		60	-0.360647	-1.25429	0.147826	0.299295	1	9916	tags=27%, list=18%, signal=32%
GO_NAD_METABOLIC_PROCESS	GO_NAD_METABOLIC_PROCESS		50	-0.386841	-1.25414	0.198381	0.299081	1	5175	tags=24%, list=9%, signal=26%
GO_ESTABLISHMENT_OF_EPITHELIAL_CELL_POLARITY	GO_ESTABLISHMENT_OF_EPITHELIAL_CELL_POLARITY		30	-0.398339	-1.2541	0.201245	0.298752	1	8641	tags=43%, list=16%, signal=51%
GO_REGULATION_OF_HEART_MORPHOGENESIS	GO_REGULATION_OF_HEART_MORPHOGENESIS		40	-0.397569	-1.25244	0.182008	0.300516	1	12210	tags=48%, list=22%, signal=61%
GO_FATTY_ACID_DERIVATIVE_METABOLIC_PROCESS	GO_FATTY_ACID_DERIVATIVE_METABOLIC_PROCESS		175	-0.311324	-1.25195	0.116183	0.300789	1	7738	tags=25%, list=14%, signal=28%
GO_RESPONSE_TO_NUTRIENT	GO_RESPONSE_TO_NUTRIENT		171	-0.315552	-1.25173	0.126556	0.300716	1	7753	tags=22%, list=14%, signal=26%
GO_NOREPINEPHRINE_TRANSPORT	GO_NOREPINEPHRINE_TRANSPORT		25	-0.434865	-1.25096	0.169851	0.301328	1	7988	tags=24%, list=14%, signal=28%
GO_RESPONSE_TO_FATTY_ACID	GO_RESPONSE_TO_FATTY_ACID		88	-0.33641	-1.25048	0.152866	0.301588	1	8444	tags=26%, list=15%, signal=31%
GO_POSITIVE_REGULATION_OF_CAMP_MEDIATED_SIGNALING	GO_POSITIVE_REGULATION_OF_CAMP_MEDIATED_SIGNALING		20	-0.425693	-1.25022	0.167373	0.301571	1	5278	tags=20%, list=10%, signal=22%
GO_POLYOL_BIOSYNTHETIC_PROCESS	GO_POLYOL_BIOSYNTHETIC_PROCESS		64	-0.3479	-1.25009	0.136821	0.301339	1	7674	tags=23%, list=14%, signal=27%
GO_REGULATION_OF_RYANODINE_SENSITIVE_CALCIUM_RELEASE_CHANNEL_ACTIVITY	GO_REGULATION_OF_RYANODINE_SENSITIVE_CALCIUM_RELEASE_CHANNEL_ACTIVITY		26	-0.412083	-1.24965	0.17562	0.30152	1	10836	tags=46%, list=20%, signal=57%
GO_TRANSEPITHELIAL_TRANSPORT	GO_TRANSEPITHELIAL_TRANSPORT		26	-0.417489	-1.24948	0.177824	0.301321	1	3662	tags=23%, list=7%, signal=25%
GO_REGULATION_OF_TRANSCRIPTION_BY_RNA_POLYMERASE_III	GO_REGULATION_OF_TRANSCRIPTION_BY_RNA_POLYMERASE_III		23	-0.455839	-1.24931	0.236735	0.301136	1	10648	tags=52%, list=19%, signal=65%
GO_NUCLEOBASE_CONTAINING_SMALL_MOLECULE_CATABOLIC_PROCESS	GO_NUCLEOBASE_CONTAINING_SMALL_MOLECULE_CATABOLIC_PROCESS		49	-0.375339	-1.24813	0.188641	0.302285	1	8667	tags=29%, list=16%, signal=34%
GO_REGULATION_OF_CILIUM_DEPENDENT_CELL_MOTILITY	GO_REGULATION_OF_CILIUM_DEPENDENT_CELL_MOTILITY		24	-0.427063	-1.24777	0.181818	0.302372	1	9166	tags=38%, list=17%, signal=45%
GO_DEOXYRIBOSE_PHOSPHATE_CATABOLIC_PROCESS	GO_DEOXYRIBOSE_PHOSPHATE_CATABOLIC_PROCESS		21	-0.442212	-1.24766	0.220884	0.30214	1	12672	tags=48%, list=23%, signal=62%
GO_LUNG_CELL_DIFFERENTIATION	GO_LUNG_CELL_DIFFERENTIATION		23	-0.425736	-1.24702	0.198381	0.302589	1	8326	tags=26%, list=15%, signal=31%
GO_REGULATION_OF_GLYCOGEN_METABOLIC_PROCESS	GO_REGULATION_OF_GLYCOGEN_METABOLIC_PROCESS		36	-0.364754	-1.24701	0.135294	0.302209	1	9349	tags=31%, list=17%, signal=37%
GO_RESPONSE_TO_CALCIUM_ION	GO_RESPONSE_TO_CALCIUM_ION		146	-0.312072	-1.24699	0.13963	0.301857	1	10669	tags=30%, list=19%, signal=37%
GO_POSITIVE_REGULATION_OF_LYASE_ACTIVITY	GO_POSITIVE_REGULATION_OF_LYASE_ACTIVITY		23	-0.401411	-1.24612	0.164609	0.302534	1	9351	tags=26%, list=17%, signal=31%
GO_LEARNING	GO_LEARNING		145	-0.331058	-1.24589	0.1375	0.302413	1	10185	tags=29%, list=18%, signal=35%
GO_REGULATION_OF_ERAD_PATHWAY	GO_REGULATION_OF_ERAD_PATHWAY		30	-0.429133	-1.24533	0.195266	0.302772	1	9361	tags=40%, list=17%, signal=48%
GO_NEUROTRANSMITTER_UPTAKE	GO_NEUROTRANSMITTER_UPTAKE		42	-0.369866	-1.24386	0.161765	0.304279	1	10423	tags=36%, list=19%, signal=44%
GO_REGULATION_OF_VACUOLE_ORGANIZATION	GO_REGULATION_OF_VACUOLE_ORGANIZATION		47	-0.390399	-1.24308	0.208768	0.304898	1	9084	tags=32%, list=16%, signal=38%
GO_REGULATION_OF_PROTEIN_EXIT_FROM_ENDOPLASMIC_RETICULUM	GO_REGULATION_OF_PROTEIN_EXIT_FROM_ENDOPLASMIC_RETICULUM		28	-0.437285	-1.24307	0.218688	0.304524	1	10945	tags=39%, list=20%, signal=49%
GO_CALCIUM_ION_REGULATED_EXOCYTOSIS	GO_CALCIUM_ION_REGULATED_EXOCYTOSIS		65	-0.353524	-1.24258	0.152893	0.304752	1	11515	tags=42%, list=21%, signal=52%
GO_PLASMA_MEMBRANE_FUSION	GO_PLASMA_MEMBRANE_FUSION		26	-0.411491	-1.24149	0.199143	0.305752	1	10040	tags=35%, list=18%, signal=42%
GO_ESTROGEN_METABOLIC_PROCESS	GO_ESTROGEN_METABOLIC_PROCESS		32	-0.394139	-1.24035	0.193548	0.306848	1	13456	tags=41%, list=24%, signal=54%
GO_POSITIVE_REGULATION_OF_CATION_CHANNEL_ACTIVITY	GO_POSITIVE_REGULATION_OF_CATION_CHANNEL_ACTIVITY		73	-0.346196	-1.23983	0.153061	0.307193	1	10589	tags=37%, list=19%, signal=46%
GO_REGULATION_OF_STEM_CELL_PROLIFERATION	GO_REGULATION_OF_STEM_CELL_PROLIFERATION		73	-0.334552	-1.2396	0.179226	0.307093	1	6968	tags=26%, list=13%, signal=30%
GO_TOXIN_TRANSPORT	GO_TOXIN_TRANSPORT		41	-0.393523	-1.23908	0.209446	0.307388	1	6247	tags=24%, list=11%, signal=27%
GO_NEGATIVE_REGULATION_OF_VASCULATURE_DEVELOPMENT	GO_NEGATIVE_REGULATION_OF_VASCULATURE_DEVELOPMENT		181	-0.314531	-1.23801	0.152083	0.30834	1	7054	tags=19%, list=13%, signal=22%
GO_NEGATIVE_REGULATION_OF_MYELOID_CELL_DIFFERENTIATION	GO_NEGATIVE_REGULATION_OF_MYELOID_CELL_DIFFERENTIATION		95	-0.335499	-1.23717	0.150943	0.309078	1	10411	tags=33%, list=19%, signal=40%
GO_INNER_EAR_AUDITORY_RECEPTOR_CELL_DIFFERENTIATION	GO_INNER_EAR_AUDITORY_RECEPTOR_CELL_DIFFERENTIATION		36	-0.365941	-1.23665	0.172131	0.309375	1	8109	tags=31%, list=15%, signal=36%
GO_RETINOL_METABOLIC_PROCESS	GO_RETINOL_METABOLIC_PROCESS		47	-0.361011	-1.23613	0.149798	0.309706	1	6324	tags=23%, list=11%, signal=26%
GO_REGULATION_OF_SKELETAL_MUSCLE_TISSUE_DEVELOPMENT	GO_REGULATION_OF_SKELETAL_MUSCLE_TISSUE_DEVELOPMENT		48	-0.393395	-1.2361	0.194215	0.30936	1	6672	tags=27%, list=12%, signal=31%
GO_PYRIMIDINE_RIBONUCLEOTIDE_METABOLIC_PROCESS	GO_PYRIMIDINE_RIBONUCLEOTIDE_METABOLIC_PROCESS		24	-0.411322	-1.23587	0.198783	0.309288	1	7268	tags=29%, list=13%, signal=34%
GO_POSITIVE_REGULATION_OF_RESPONSE_TO_OXIDATIVE_STRESS	GO_POSITIVE_REGULATION_OF_RESPONSE_TO_OXIDATIVE_STRESS		20	-0.432722	-1.23576	0.205821	0.309044	1	13850	tags=45%, list=25%, signal=60%
GO_METANEPHRIC_NEPHRON_EPITHELIUM_DEVELOPMENT	GO_METANEPHRIC_NEPHRON_EPITHELIUM_DEVELOPMENT		23	-0.418499	-1.2355	0.202869	0.309015	1	4486	tags=22%, list=8%, signal=24%
GO_POSITIVE_REGULATION_OF_ENDOTHELIAL_CELL_MIGRATION	GO_POSITIVE_REGULATION_OF_ENDOTHELIAL_CELL_MIGRATION		124	-0.332137	-1.23549	0.195171	0.308644	1	9640	tags=31%, list=17%, signal=37%
GO_LONG_CHAIN_FATTY_ACYL_COA_METABOLIC_PROCESS	GO_LONG_CHAIN_FATTY_ACYL_COA_METABOLIC_PROCESS		25	-0.38398	-1.23527	0.194154	0.308581	1	7738	tags=44%, list=14%, signal=51%
GO_PHOSPHATIDYLINOSITOL_BIOSYNTHETIC_PROCESS	GO_PHOSPHATIDYLINOSITOL_BIOSYNTHETIC_PROCESS		118	-0.363163	-1.23372	0.224066	0.310213	1	10887	tags=35%, list=20%, signal=43%
GO_NCRNA_CATABOLIC_PROCESS	GO_NCRNA_CATABOLIC_PROCESS		38	-0.398988	-1.23358	0.237052	0.309991	1	13748	tags=37%, list=25%, signal=49%
GO_ESTABLISHMENT_OR_MAINTENANCE_OF_BIPOLAR_CELL_POLARITY	GO_ESTABLISHMENT_OR_MAINTENANCE_OF_BIPOLAR_CELL_POLARITY		48	-0.379808	-1.23347	0.206612	0.309735	1	10182	tags=38%, list=18%, signal=46%
GO_REGULATION_OF_SYNAPTIC_TRANSMISSION_GABAERGIC	GO_REGULATION_OF_SYNAPTIC_TRANSMISSION_GABAERGIC		35	-0.4047	-1.2331	0.185263	0.309795	1	13055	tags=46%, list=24%, signal=60%
GO_RESPONSE_TO_TESTOSTERONE	GO_RESPONSE_TO_TESTOSTERONE		41	-0.350568	-1.23295	0.145791	0.309607	1	4985	tags=22%, list=9%, signal=24%
GO_POSITIVE_REGULATION_OF_EPITHELIAL_CELL_DIFFERENTIATION	GO_POSITIVE_REGULATION_OF_EPITHELIAL_CELL_DIFFERENTIATION		73	-0.329568	-1.23247	0.150495	0.309862	1	5151	tags=19%, list=9%, signal=21%
GO_EPITHELIAL_CELL_DIFFERENTIATION_INVOLVED_IN_KIDNEY_DEVELOPMENT	GO_EPITHELIAL_CELL_DIFFERENTIATION_INVOLVED_IN_KIDNEY_DEVELOPMENT		47	-0.384855	-1.2317	0.194672	0.310445	1	4641	tags=28%, list=8%, signal=30%
GO_REGULATION_OF_CARDIAC_MUSCLE_CONTRACTION	GO_REGULATION_OF_CARDIAC_MUSCLE_CONTRACTION		80	-0.328933	-1.23106	0.159184	0.310877	1	10836	tags=36%, list=20%, signal=45%
GO_POSITIVE_REGULATION_OF_SKELETAL_MUSCLE_TISSUE_DEVELOPMENT	GO_POSITIVE_REGULATION_OF_SKELETAL_MUSCLE_TISSUE_DEVELOPMENT		25	-0.454107	-1.23036	0.225296	0.311393	1	2155	tags=20%, list=4%, signal=21%
GO_MYELOID_CELL_HOMEOSTASIS	GO_MYELOID_CELL_HOMEOSTASIS		154	-0.329903	-1.23027	0.185263	0.311133	1	6518	tags=24%, list=12%, signal=27%
GO_POSITIVE_REGULATION_OF_CALCIUM_ION_TRANSPORT	GO_POSITIVE_REGULATION_OF_CALCIUM_ION_TRANSPORT		121	-0.34654	-1.22913	0.189362	0.312217	1	13414	tags=36%, list=24%, signal=48%
GO_POSITIVE_REGULATION_OF_LONG_TERM_SYNAPTIC_POTENTIATION	GO_POSITIVE_REGULATION_OF_LONG_TERM_SYNAPTIC_POTENTIATION		23	-0.420932	-1.22806	0.218107	0.313161	1	8711	tags=35%, list=16%, signal=41%
GO_ACTIVIN_RECEPTOR_SIGNALING_PATHWAY	GO_ACTIVIN_RECEPTOR_SIGNALING_PATHWAY		45	-0.379738	-1.22668	0.203057	0.314532	1	6075	tags=24%, list=11%, signal=27%
GO_PYRIMIDINE_CONTAINING_COMPOUND_BIOSYNTHETIC_PROCESS	GO_PYRIMIDINE_CONTAINING_COMPOUND_BIOSYNTHETIC_PROCESS		41	-0.370657	-1.22655	0.204365	0.314341	1	7576	tags=27%, list=14%, signal=31%
GO_PHYSIOLOGICAL_CARDIAC_MUSCLE_HYPERTROPHY	GO_PHYSIOLOGICAL_CARDIAC_MUSCLE_HYPERTROPHY		32	-0.372201	-1.22554	0.168399	0.315224	1	9696	tags=22%, list=17%, signal=26%
GO_CARDIAC_CELL_DEVELOPMENT	GO_CARDIAC_CELL_DEVELOPMENT		82	-0.38614	-1.2246	0.206	0.316022	1	10464	tags=29%, list=19%, signal=36%
GO_CELL_COMMUNICATION_BY_ELECTRICAL_COUPLING	GO_CELL_COMMUNICATION_BY_ELECTRICAL_COUPLING		31	-0.415098	-1.22447	0.227176	0.315785	1	5902	tags=29%, list=11%, signal=32%
GO_POSITIVE_REGULATION_OF_DENDRITIC_SPINE_MORPHOGENESIS	GO_POSITIVE_REGULATION_OF_DENDRITIC_SPINE_MORPHOGENESIS		21	-0.451485	-1.22393	0.229979	0.316095	1	8140	tags=43%, list=15%, signal=50%
GO_SKELETAL_MUSCLE_CELL_DIFFERENTIATION	GO_SKELETAL_MUSCLE_CELL_DIFFERENTIATION		68	-0.379096	-1.22377	0.206897	0.315898	1	6390	tags=22%, list=12%, signal=25%
GO_NEGATIVE_REGULATION_OF_OSSIFICATION	GO_NEGATIVE_REGULATION_OF_OSSIFICATION		79	-0.346386	-1.22331	0.21118	0.316107	1	12376	tags=39%, list=22%, signal=50%
GO_CARDIAC_MUSCLE_CELL_DIFFERENTIATION	GO_CARDIAC_MUSCLE_CELL_DIFFERENTIATION		119	-0.350583	-1.22284	0.206186	0.316295	1	10464	tags=29%, list=19%, signal=36%
GO_REGULATION_OF_PLATELET_AGGREGATION	GO_REGULATION_OF_PLATELET_AGGREGATION		21	-0.408127	-1.22206	0.193333	0.316943	1	5278	tags=24%, list=10%, signal=26%
GO_NEGATIVE_REGULATION_OF_SMOOTHENED_SIGNALING_PATHWAY	GO_NEGATIVE_REGULATION_OF_SMOOTHENED_SIGNALING_PATHWAY		33	-0.413807	-1.22126	0.21118	0.317615	1	8722	tags=36%, list=16%, signal=43%
GO_PYRIMIDINE_CONTAINING_COMPOUND_METABOLIC_PROCESS	GO_PYRIMIDINE_CONTAINING_COMPOUND_METABOLIC_PROCESS		85	-0.337955	-1.22123	0.191532	0.317279	1	8054	tags=25%, list=15%, signal=29%
GO_GLOMERULAR_EPITHELIUM_DEVELOPMENT	GO_GLOMERULAR_EPITHELIUM_DEVELOPMENT		23	-0.414696	-1.22087	0.213415	0.317367	1	1920	tags=26%, list=3%, signal=27%
GO_COLUMNAR_CUBOIDAL_EPITHELIAL_CELL_DIFFERENTIATION	GO_COLUMNAR_CUBOIDAL_EPITHELIAL_CELL_DIFFERENTIATION		118	-0.334285	-1.2206	0.177106	0.317358	1	8109	tags=28%, list=15%, signal=33%
GO_NEGATIVE_REGULATION_OF_ORGANELLE_ASSEMBLY	GO_NEGATIVE_REGULATION_OF_ORGANELLE_ASSEMBLY		38	-0.371154	-1.21994	0.208925	0.317844	1	8920	tags=34%, list=16%, signal=41%
GO_ANDROGEN_RECEPTOR_SIGNALING_PATHWAY	GO_ANDROGEN_RECEPTOR_SIGNALING_PATHWAY		43	-0.375189	-1.21895	0.227557	0.318708	1	9088	tags=28%, list=16%, signal=33%
GO_SARCOPLASMIC_RETICULUM_CALCIUM_ION_TRANSPORT	GO_SARCOPLASMIC_RETICULUM_CALCIUM_ION_TRANSPORT		40	-0.445789	-1.21893	0.270707	0.318346	1	10836	tags=43%, list=20%, signal=53%
GO_POSITIVE_REGULATION_OF_STEM_CELL_PROLIFERATION	GO_POSITIVE_REGULATION_OF_STEM_CELL_PROLIFERATION		43	-0.367252	-1.21838	0.214859	0.318724	1	10350	tags=37%, list=19%, signal=46%
GO_TONGUE_DEVELOPMENT	GO_TONGUE_DEVELOPMENT		23	-0.425908	-1.21714	0.256729	0.319974	1	5413	tags=26%, list=10%, signal=29%
GO_POSITIVE_REGULATION_OF_DENDRITE_DEVELOPMENT	GO_POSITIVE_REGULATION_OF_DENDRITE_DEVELOPMENT		75	-0.374735	-1.21658	0.230608	0.320315	1	8140	tags=32%, list=15%, signal=37%
GO_REGULATION_OF_TRIGLYCERIDE_METABOLIC_PROCESS	GO_REGULATION_OF_TRIGLYCERIDE_METABOLIC_PROCESS		41	-0.357474	-1.21643	0.187243	0.320153	1	9113	tags=32%, list=16%, signal=38%
GO_POSITIVE_REGULATION_OF_LIPID_CATABOLIC_PROCESS	GO_POSITIVE_REGULATION_OF_LIPID_CATABOLIC_PROCESS		27	-0.411849	-1.21601	0.201232	0.320315	1	8946	tags=30%, list=16%, signal=35%
GO_MITOCHONDRIAL_CALCIUM_ION_TRANSMEMBRANE_TRANSPORT	GO_MITOCHONDRIAL_CALCIUM_ION_TRANSMEMBRANE_TRANSPORT		25	-0.421843	-1.21557	0.258824	0.320464	1	11828	tags=44%, list=21%, signal=56%
GO_NON_RECOMBINATIONAL_REPAIR	GO_NON_RECOMBINATIONAL_REPAIR		104	-0.36598	-1.21554	0.237052	0.320126	1	11083	tags=38%, list=20%, signal=48%
GO_STRIATED_MUSCLE_CELL_PROLIFERATION	GO_STRIATED_MUSCLE_CELL_PROLIFERATION		80	-0.363833	-1.2151	0.214737	0.320337	1	14157	tags=40%, list=26%, signal=54%
GO_NEGATIVE_REGULATION_OF_BLOOD_VESSEL_ENDOTHELIAL_CELL_MIGRATION	GO_NEGATIVE_REGULATION_OF_BLOOD_VESSEL_ENDOTHELIAL_CELL_MIGRATION		73	-0.328401	-1.21371	0.189979	0.321769	1	5038	tags=14%, list=9%, signal=15%
GO_REGULATION_OF_VASCULAR_PERMEABILITY	GO_REGULATION_OF_VASCULAR_PERMEABILITY		45	-0.359433	-1.21344	0.221095	0.321709	1	8982	tags=40%, list=16%, signal=48%
GO_INOSITOL_PHOSPHATE_MEDIATED_SIGNALING	GO_INOSITOL_PHOSPHATE_MEDIATED_SIGNALING		57	-0.355716	-1.21293	0.191532	0.321977	1	9696	tags=35%, list=17%, signal=42%
GO_VENTRICULAR_SEPTUM_DEVELOPMENT	GO_VENTRICULAR_SEPTUM_DEVELOPMENT		74	-0.379122	-1.21269	0.236025	0.321903	1	10464	tags=38%, list=19%, signal=47%
GO_MALE_MEIOTIC_NUCLEAR_DIVISION	GO_MALE_MEIOTIC_NUCLEAR_DIVISION		47	-0.355131	-1.2122	0.198745	0.322144	1	4908	tags=23%, list=9%, signal=26%
GO_POSITIVE_REGULATION_OF_GLYCOLYTIC_PROCESS	GO_POSITIVE_REGULATION_OF_GLYCOLYTIC_PROCESS		24	-0.414622	-1.21218	0.237996	0.321808	1	3489	tags=21%, list=6%, signal=22%
GO_ENDOCARDIAL_CUSHION_DEVELOPMENT	GO_ENDOCARDIAL_CUSHION_DEVELOPMENT		45	-0.388139	-1.21192	0.222944	0.321795	1	7832	tags=38%, list=14%, signal=44%
GO_REGULATION_OF_PROTON_TRANSPORT	GO_REGULATION_OF_PROTON_TRANSPORT		23	-0.411708	-1.21151	0.229839	0.321956	1	9474	tags=43%, list=17%, signal=52%
GO_ACIDIC_AMINO_ACID_TRANSPORT	GO_ACIDIC_AMINO_ACID_TRANSPORT		71	-0.330545	-1.2115	0.190283	0.321586	1	10226	tags=35%, list=18%, signal=43%
GO_REGULATION_OF_DOPAMINE_SECRETION	GO_REGULATION_OF_DOPAMINE_SECRETION		35	-0.375449	-1.21063	0.214575	0.322323	1	8418	tags=31%, list=15%, signal=37%
GO_NEGATIVE_REGULATION_OF_ION_TRANSMEMBRANE_TRANSPORT	GO_NEGATIVE_REGULATION_OF_ION_TRANSMEMBRANE_TRANSPORT		100	-0.3264	-1.21	0.17773	0.322788	1	10836	tags=28%, list=20%, signal=35%
GO_NADH_METABOLIC_PROCESS	GO_NADH_METABOLIC_PROCESS		41	-0.388862	-1.20932	0.243187	0.323323	1	8586	tags=34%, list=15%, signal=40%
GO_STRIATED_MUSCLE_CONTRACTION	GO_STRIATED_MUSCLE_CONTRACTION		175	-0.352581	-1.20833	0.232932	0.32428	1	10836	tags=33%, list=20%, signal=41%
GO_GLYCEROLIPID_CATABOLIC_PROCESS	GO_GLYCEROLIPID_CATABOLIC_PROCESS		74	-0.341573	-1.2083	0.154684	0.323926	1	8946	tags=26%, list=16%, signal=31%
GO_POSTSYNAPTIC_SPECIALIZATION_ASSEMBLY	GO_POSTSYNAPTIC_SPECIALIZATION_ASSEMBLY		21	-0.433086	-1.20813	0.213531	0.323786	1	2495	tags=24%, list=4%, signal=25%
GO_RECEPTOR_LOCALIZATION_TO_SYNAPSE	GO_RECEPTOR_LOCALIZATION_TO_SYNAPSE		57	-0.350243	-1.20812	0.227743	0.323425	1	11746	tags=37%, list=21%, signal=47%
GO_GUANOSINE_CONTAINING_COMPOUND_METABOLIC_PROCESS	GO_GUANOSINE_CONTAINING_COMPOUND_METABOLIC_PROCESS		39	-0.358797	-1.20649	0.216769	0.325146	1	8667	tags=31%, list=16%, signal=36%
GO_ONE_CARBON_METABOLIC_PROCESS	GO_ONE_CARBON_METABOLIC_PROCESS		40	-0.383886	-1.20577	0.183099	0.325759	1	8119	tags=33%, list=15%, signal=38%
GO_MEIOSIS_I_CELL_CYCLE_PROCESS	GO_MEIOSIS_I_CELL_CYCLE_PROCESS		124	-0.334003	-1.20564	0.22334	0.325549	1	5965	tags=22%, list=11%, signal=24%
GO_REGULATION_OF_FATTY_ACID_BIOSYNTHETIC_PROCESS	GO_REGULATION_OF_FATTY_ACID_BIOSYNTHETIC_PROCESS		55	-0.337172	-1.20509	0.175	0.325879	1	9128	tags=27%, list=16%, signal=33%
GO_EYE_MORPHOGENESIS	GO_EYE_MORPHOGENESIS		156	-0.332035	-1.20429	0.206522	0.326478	1	9113	tags=28%, list=16%, signal=33%
GO_REGULATION_OF_KIDNEY_DEVELOPMENT	GO_REGULATION_OF_KIDNEY_DEVELOPMENT		56	-0.354719	-1.20382	0.185771	0.326694	1	5291	tags=21%, list=10%, signal=24%
GO_KIDNEY_MORPHOGENESIS	GO_KIDNEY_MORPHOGENESIS		94	-0.337549	-1.20304	0.195918	0.32735	1	7719	tags=24%, list=14%, signal=28%
GO_WATER_SOLUBLE_VITAMIN_METABOLIC_PROCESS	GO_WATER_SOLUBLE_VITAMIN_METABOLIC_PROCESS		85	-0.33267	-1.20251	0.215768	0.327665	1	11479	tags=38%, list=21%, signal=47%
GO_POSITIVE_REGULATION_OF_BONE_MINERALIZATION	GO_POSITIVE_REGULATION_OF_BONE_MINERALIZATION		40	-0.398691	-1.20247	0.235931	0.32733	1	4557	tags=25%, list=8%, signal=27%
GO_APOPTOTIC_MITOCHONDRIAL_CHANGES	GO_APOPTOTIC_MITOCHONDRIAL_CHANGES		120	-0.311514	-1.20214	0.202083	0.327385	1	9349	tags=31%, list=17%, signal=37%
GO_POSITIVE_REGULATION_OF_SUBSTRATE_ADHESION_DEPENDENT_CELL_SPREADING	GO_POSITIVE_REGULATION_OF_SUBSTRATE_ADHESION_DEPENDENT_CELL_SPREADING		38	-0.383658	-1.20208	0.235294	0.327098	1	4075	tags=24%, list=7%, signal=26%
GO_NEUROEPITHELIAL_CELL_DIFFERENTIATION	GO_NEUROEPITHELIAL_CELL_DIFFERENTIATION		56	-0.338602	-1.20198	0.192946	0.326842	1	8109	tags=29%, list=15%, signal=33%
GO_REGULATION_OF_EPITHELIAL_CELL_APOPTOTIC_PROCESS	GO_REGULATION_OF_EPITHELIAL_CELL_APOPTOTIC_PROCESS		91	-0.331506	-1.20167	0.176955	0.326881	1	8959	tags=24%, list=16%, signal=29%
GO_MESODERM_DEVELOPMENT	GO_MESODERM_DEVELOPMENT		133	-0.331583	-1.20105	0.204741	0.327348	1	10464	tags=30%, list=19%, signal=37%
GO_TERTIARY_ALCOHOL_METABOLIC_PROCESS	GO_TERTIARY_ALCOHOL_METABOLIC_PROCESS		20	-0.49278	-1.19947	0.219368	0.329089	1	7395	tags=25%, list=13%, signal=29%
GO_NEGATIVE_REGULATION_OF_MUSCLE_TISSUE_DEVELOPMENT	GO_NEGATIVE_REGULATION_OF_MUSCLE_TISSUE_DEVELOPMENT		63	-0.348739	-1.1993	0.213656	0.328975	1	11079	tags=32%, list=20%, signal=40%
GO_RESPONSE_TO_AMINO_ACID_STARVATION	GO_RESPONSE_TO_AMINO_ACID_STARVATION		48	-0.38998	-1.19868	0.264706	0.3294	1	11756	tags=42%, list=21%, signal=53%
GO_REGULATION_OF_SKELETAL_MUSCLE_CELL_DIFFERENTIATION	GO_REGULATION_OF_SKELETAL_MUSCLE_CELL_DIFFERENTIATION		20	-0.420847	-1.19862	0.25	0.329098	1	6390	tags=30%, list=12%, signal=34%
GO_RESPONSE_TO_BMP	GO_RESPONSE_TO_BMP		166	-0.323311	-1.19834	0.218487	0.329099	1	9433	tags=29%, list=17%, signal=35%
GO_REGULATION_OF_PHOSPHOPROTEIN_PHOSPHATASE_ACTIVITY	GO_REGULATION_OF_PHOSPHOPROTEIN_PHOSPHATASE_ACTIVITY		116	-0.335607	-1.19823	0.240664	0.328887	1	10389	tags=32%, list=19%, signal=39%
GO_NUCLEOSIDE_METABOLIC_PROCESS	GO_NUCLEOSIDE_METABOLIC_PROCESS		104	-0.32084	-1.19805	0.208251	0.328743	1	8011	tags=27%, list=14%, signal=31%
GO_NEGATIVE_REGULATION_OF_ORGANIC_ACID_TRANSPORT	GO_NEGATIVE_REGULATION_OF_ORGANIC_ACID_TRANSPORT		24	-0.391835	-1.19763	0.229839	0.328922	1	2788	tags=21%, list=5%, signal=22%
GO_EMBRYONIC_AXIS_SPECIFICATION	GO_EMBRYONIC_AXIS_SPECIFICATION		39	-0.356436	-1.19701	0.216842	0.3294	1	12376	tags=41%, list=22%, signal=53%
GO_CELL_DIFFERENTIATION_IN_HINDBRAIN	GO_CELL_DIFFERENTIATION_IN_HINDBRAIN		22	-0.442488	-1.19661	0.242739	0.329518	1	7681	tags=32%, list=14%, signal=37%
GO_GLOMERULAR_EPITHELIAL_CELL_DIFFERENTIATION	GO_GLOMERULAR_EPITHELIAL_CELL_DIFFERENTIATION		20	-0.408104	-1.19653	0.240326	0.329262	1	1920	tags=25%, list=3%, signal=26%
GO_POSITIVE_REGULATION_OF_ANION_TRANSPORT	GO_POSITIVE_REGULATION_OF_ANION_TRANSPORT		58	-0.337267	-1.19631	0.174194	0.329185	1	7753	tags=21%, list=14%, signal=24%
GO_POSITIVE_REGULATION_OF_EPITHELIAL_CELL_MIGRATION	GO_POSITIVE_REGULATION_OF_EPITHELIAL_CELL_MIGRATION		168	-0.317428	-1.19522	0.219462	0.330169	1	7786	tags=27%, list=14%, signal=32%
GO_STORE_OPERATED_CALCIUM_ENTRY	GO_STORE_OPERATED_CALCIUM_ENTRY		20	-0.405875	-1.1952	0.237154	0.32983	1	8053	tags=25%, list=15%, signal=29%
GO_NEGATIVE_REGULATION_OF_MUSCLE_CELL_DIFFERENTIATION	GO_NEGATIVE_REGULATION_OF_MUSCLE_CELL_DIFFERENTIATION		67	-0.347465	-1.19445	0.210736	0.330449	1	8996	tags=27%, list=16%, signal=32%
GO_REGULATION_OF_PHOSPHOLIPID_METABOLIC_PROCESS	GO_REGULATION_OF_PHOSPHOLIPID_METABOLIC_PROCESS		95	-0.333774	-1.19354	0.2125	0.331322	1	6644	tags=20%, list=12%, signal=23%
GO_POSITIVE_REGULATION_OF_PEPTIDYL_LYSINE_ACETYLATION	GO_POSITIVE_REGULATION_OF_PEPTIDYL_LYSINE_ACETYLATION		33	-0.363278	-1.19291	0.224839	0.331758	1	6963	tags=33%, list=13%, signal=38%
GO_NEGATIVE_REGULATION_OF_TRANSMEMBRANE_TRANSPORT	GO_NEGATIVE_REGULATION_OF_TRANSMEMBRANE_TRANSPORT		124	-0.31324	-1.19227	0.178495	0.332201	1	10836	tags=27%, list=20%, signal=33%
GO_SPERMATID_NUCLEUS_DIFFERENTIATION	GO_SPERMATID_NUCLEUS_DIFFERENTIATION		23	-0.421068	-1.19212	0.257028	0.332042	1	9528	tags=43%, list=17%, signal=52%
GO_SEQUESTERING_OF_CALCIUM_ION	GO_SEQUESTERING_OF_CALCIUM_ION		121	-0.330596	-1.19175	0.233954	0.332147	1	10836	tags=31%, list=20%, signal=38%
GO_POSITIVE_REGULATION_OF_LIPASE_ACTIVITY	GO_POSITIVE_REGULATION_OF_LIPASE_ACTIVITY		76	-0.332785	-1.19104	0.223602	0.332706	1	7764	tags=25%, list=14%, signal=29%
GO_POSITIVE_REGULATION_OF_CARDIAC_MUSCLE_CELL_PROLIFERATION	GO_POSITIVE_REGULATION_OF_CARDIAC_MUSCLE_CELL_PROLIFERATION		36	-0.372039	-1.19086	0.234927	0.332595	1	13300	tags=39%, list=24%, signal=51%
GO_PROTEIN_LOCALIZATION_TO_SYNAPSE	GO_PROTEIN_LOCALIZATION_TO_SYNAPSE		85	-0.324325	-1.19039	0.243902	0.332891	1	8867	tags=27%, list=16%, signal=32%
GO_PROTEIN_K63_LINKED_UBIQUITINATION	GO_PROTEIN_K63_LINKED_UBIQUITINATION		57	-0.360073	-1.18929	0.239085	0.334057	1	12079	tags=39%, list=22%, signal=49%
GO_NCRNA_3_END_PROCESSING	GO_NCRNA_3_END_PROCESSING		51	-0.395521	-1.18898	0.277445	0.334078	1	11643	tags=27%, list=21%, signal=35%
GO_POSITIVE_REGULATION_OF_SODIUM_ION_TRANSPORT	GO_POSITIVE_REGULATION_OF_SODIUM_ION_TRANSPORT		34	-0.366982	-1.18883	0.253138	0.333884	1	5506	tags=21%, list=10%, signal=23%
GO_GLYCOSYL_COMPOUND_METABOLIC_PROCESS	GO_GLYCOSYL_COMPOUND_METABOLIC_PROCESS		129	-0.32268	-1.18832	0.216963	0.334168	1	8011	tags=26%, list=14%, signal=31%
GO_VISUAL_BEHAVIOR	GO_VISUAL_BEHAVIOR		53	-0.341506	-1.18824	0.235908	0.333892	1	8867	tags=25%, list=16%, signal=29%
GO_METANEPHROS_DEVELOPMENT	GO_METANEPHROS_DEVELOPMENT		91	-0.346337	-1.18786	0.221757	0.334005	1	4665	tags=18%, list=8%, signal=19%
GO_DRUG_METABOLIC_PROCESS	GO_DRUG_METABOLIC_PROCESS		46	-0.36916	-1.1871	0.22449	0.334605	1	14898	tags=37%, list=27%, signal=50%
GO_NEUROMUSCULAR_SYNAPTIC_TRANSMISSION	GO_NEUROMUSCULAR_SYNAPTIC_TRANSMISSION		23	-0.409356	-1.1869	0.222892	0.334469	1	5554	tags=26%, list=10%, signal=29%
GO_MUSCLE_CELL_DEVELOPMENT	GO_MUSCLE_CELL_DEVELOPMENT		176	-0.366737	-1.18689	0.287449	0.334116	1	10464	tags=30%, list=19%, signal=36%
GO_CELLULAR_RESPONSE_TO_CALCIUM_ION	GO_CELLULAR_RESPONSE_TO_CALCIUM_ION		82	-0.322385	-1.18668	0.201646	0.334016	1	5966	tags=21%, list=11%, signal=23%
GO_NEGATIVE_REGULATION_OF_MUSCLE_CELL_APOPTOTIC_PROCESS	GO_NEGATIVE_REGULATION_OF_MUSCLE_CELL_APOPTOTIC_PROCESS		46	-0.339661	-1.18628	0.2	0.334161	1	8067	tags=24%, list=15%, signal=28%
GO_CELLULAR_CARBOHYDRATE_BIOSYNTHETIC_PROCESS	GO_CELLULAR_CARBOHYDRATE_BIOSYNTHETIC_PROCESS		86	-0.325833	-1.18626	0.19877	0.333825	1	9796	tags=30%, list=18%, signal=37%
GO_REGULATION_OF_ANION_TRANSPORT	GO_REGULATION_OF_ANION_TRANSPORT		105	-0.312614	-1.18609	0.195426	0.33367	1	8012	tags=23%, list=14%, signal=27%
GO_REGULATION_OF_HEART_GROWTH	GO_REGULATION_OF_HEART_GROWTH		83	-0.332588	-1.18563	0.229958	0.333846	1	9696	tags=27%, list=17%, signal=32%
GO_CEREBELLAR_CORTEX_FORMATION	GO_CEREBELLAR_CORTEX_FORMATION		24	-0.428403	-1.18553	0.263713	0.333614	1	12788	tags=46%, list=23%, signal=60%
GO_CELL_COMMUNICATION_INVOLVED_IN_CARDIAC_CONDUCTION	GO_CELL_COMMUNICATION_INVOLVED_IN_CARDIAC_CONDUCTION		56	-0.338804	-1.1852	0.218295	0.333726	1	10836	tags=38%, list=20%, signal=47%
GO_REGULATION_OF_ATP_BIOSYNTHETIC_PROCESS	GO_REGULATION_OF_ATP_BIOSYNTHETIC_PROCESS		20	-0.384458	-1.18448	0.226804	0.334302	1	9474	tags=40%, list=17%, signal=48%
GO_PANCREAS_DEVELOPMENT	GO_PANCREAS_DEVELOPMENT		79	-0.352762	-1.18437	0.216274	0.334061	1	12744	tags=38%, list=23%, signal=49%
GO_REGULATION_OF_SPROUTING_ANGIOGENESIS	GO_REGULATION_OF_SPROUTING_ANGIOGENESIS		126	-0.31127	-1.18418	0.238494	0.333961	1	6980	tags=18%, list=13%, signal=21%
GO_GLUCOSE_CATABOLIC_PROCESS	GO_GLUCOSE_CATABOLIC_PROCESS		36	-0.385259	-1.18407	0.26569	0.333738	1	8586	tags=33%, list=15%, signal=39%
GO_POSITIVE_REGULATION_OF_CARTILAGE_DEVELOPMENT	GO_POSITIVE_REGULATION_OF_CARTILAGE_DEVELOPMENT		32	-0.388681	-1.18383	0.245322	0.333675	1	4198	tags=25%, list=8%, signal=27%
GO_SIGNALING_RECEPTOR_LIGAND_PRECURSOR_PROCESSING	GO_SIGNALING_RECEPTOR_LIGAND_PRECURSOR_PROCESSING		35	-0.366805	-1.18356	0.246862	0.333671	1	9969	tags=29%, list=18%, signal=35%
GO_POSITIVE_REGULATION_OF_CALCIUM_ION_IMPORT	GO_POSITIVE_REGULATION_OF_CALCIUM_ION_IMPORT		21	-0.423174	-1.18336	0.235644	0.333572	1	6251	tags=24%, list=11%, signal=27%
GO_NEGATIVE_REGULATION_OF_MAPK_CASCADE	GO_NEGATIVE_REGULATION_OF_MAPK_CASCADE		178	-0.302013	-1.18262	0.208247	0.33411	1	9646	tags=26%, list=17%, signal=31%
GO_SPLICEOSOMAL_COMPLEX_ASSEMBLY	GO_SPLICEOSOMAL_COMPLEX_ASSEMBLY		82	-0.357433	-1.18222	0.27593	0.334247	1	14256	tags=41%, list=26%, signal=56%
GO_GLANDULAR_EPITHELIAL_CELL_DEVELOPMENT	GO_GLANDULAR_EPITHELIAL_CELL_DEVELOPMENT		26	-0.387356	-1.18186	0.248936	0.334404	1	7395	tags=38%, list=13%, signal=44%
GO_CHOLESTEROL_EFFLUX	GO_CHOLESTEROL_EFFLUX		60	-0.334673	-1.18165	0.208247	0.334296	1	12376	tags=35%, list=22%, signal=45%
GO_EMBRYONIC_CAMERA_TYPE_EYE_DEVELOPMENT	GO_EMBRYONIC_CAMERA_TYPE_EYE_DEVELOPMENT		39	-0.393462	-1.18076	0.252588	0.335043	1	9088	tags=38%, list=16%, signal=46%
GO_REGULATION_OF_CELL_MIGRATION_INVOLVED_IN_SPROUTING_ANGIOGENESIS	GO_REGULATION_OF_CELL_MIGRATION_INVOLVED_IN_SPROUTING_ANGIOGENESIS		76	-0.332605	-1.1804	0.25102	0.335171	1	6607	tags=17%, list=12%, signal=19%
GO_REGULATION_OF_MICROTUBULE_CYTOSKELETON_ORGANIZATION	GO_REGULATION_OF_MICROTUBULE_CYTOSKELETON_ORGANIZATION		190	-0.338227	-1.1801	0.273486	0.335228	1	9936	tags=29%, list=18%, signal=36%
GO_NUCLEOSOME_ORGANIZATION	GO_NUCLEOSOME_ORGANIZATION		180	-0.338562	-1.18001	0.272201	0.334997	1	9263	tags=28%, list=17%, signal=33%
GO_REGULATION_OF_SYSTEMIC_ARTERIAL_BLOOD_PRESSURE_BY_RENIN_ANGIOTENSIN	GO_REGULATION_OF_SYSTEMIC_ARTERIAL_BLOOD_PRESSURE_BY_RENIN_ANGIOTENSIN		26	-0.398509	-1.17986	0.232558	0.334814	1	8716	tags=27%, list=16%, signal=32%
GO_POLYSACCHARIDE_BIOSYNTHETIC_PROCESS	GO_POLYSACCHARIDE_BIOSYNTHETIC_PROCESS		78	-0.336042	-1.17969	0.224359	0.334701	1	9796	tags=33%, list=18%, signal=40%
GO_CYTOSOLIC_CALCIUM_ION_TRANSPORT	GO_CYTOSOLIC_CALCIUM_ION_TRANSPORT		175	-0.314065	-1.17889	0.245902	0.335392	1	10836	tags=30%, list=20%, signal=37%
GO_LACTATION	GO_LACTATION		49	-0.338292	-1.17888	0.226337	0.335038	1	5993	tags=22%, list=11%, signal=25%
GO_HOMOLOGOUS_CHROMOSOME_SEGREGATION	GO_HOMOLOGOUS_CHROMOSOME_SEGREGATION		62	-0.342953	-1.17852	0.230769	0.335137	1	6549	tags=23%, list=12%, signal=26%
GO_REGULATION_OF_ICOSANOID_SECRETION	GO_REGULATION_OF_ICOSANOID_SECRETION		20	-0.404298	-1.17831	0.237113	0.33506	1	3343	tags=15%, list=6%, signal=16%
GO_RESPONSE_TO_CORTICOSTERONE	GO_RESPONSE_TO_CORTICOSTERONE		20	-0.41029	-1.1777	0.237903	0.335461	1	15133	tags=45%, list=27%, signal=62%
GO_NEURAL_NUCLEUS_DEVELOPMENT	GO_NEURAL_NUCLEUS_DEVELOPMENT		62	-0.331225	-1.17744	0.202174	0.335417	1	3619	tags=19%, list=7%, signal=21%
GO_ENDOCRINE_HORMONE_SECRETION	GO_ENDOCRINE_HORMONE_SECRETION		47	-0.333598	-1.17725	0.1893	0.335287	1	10464	tags=32%, list=19%, signal=39%
GO_LONG_TERM_SYNAPTIC_DEPRESSION	GO_LONG_TERM_SYNAPTIC_DEPRESSION		31	-0.358808	-1.17656	0.232323	0.335839	1	9531	tags=35%, list=17%, signal=43%
GO_HISTONE_DEACETYLATION	GO_HISTONE_DEACETYLATION		79	-0.369407	-1.17637	0.287671	0.335738	1	8352	tags=28%, list=15%, signal=33%
GO_SKIN_EPIDERMIS_DEVELOPMENT	GO_SKIN_EPIDERMIS_DEVELOPMENT		90	-0.345541	-1.17631	0.25567	0.33546	1	8219	tags=30%, list=15%, signal=35%
GO_SPLICEOSOMAL_TRI_SNRNP_COMPLEX_ASSEMBLY	GO_SPLICEOSOMAL_TRI_SNRNP_COMPLEX_ASSEMBLY		27	-0.399807	-1.17549	0.253937	0.336163	1	13199	tags=44%, list=24%, signal=58%
GO_REGULATION_OF_INTRACELLULAR_STEROID_HORMONE_RECEPTOR_SIGNALING_PATHWAY	GO_REGULATION_OF_INTRACELLULAR_STEROID_HORMONE_RECEPTOR_SIGNALING_PATHWAY		75	-0.351451	-1.17542	0.244353	0.335888	1	8996	tags=31%, list=16%, signal=37%
GO_REGULATION_OF_TRANSLATIONAL_FIDELITY	GO_REGULATION_OF_TRANSLATIONAL_FIDELITY		20	-0.454675	-1.17533	0.277666	0.335645	1	10441	tags=50%, list=19%, signal=62%
GO_REGULATION_OF_CALCIUM_ION_TRANSPORT_INTO_CYTOSOL	GO_REGULATION_OF_CALCIUM_ION_TRANSPORT_INTO_CYTOSOL		98	-0.32517	-1.17375	0.259101	0.337395	1	10836	tags=33%, list=20%, signal=41%
GO_CARDIAC_MUSCLE_CELL_PROLIFERATION	GO_CARDIAC_MUSCLE_CELL_PROLIFERATION		66	-0.359032	-1.17332	0.280335	0.337619	1	14157	tags=39%, list=26%, signal=53%
GO_ADULT_BEHAVIOR	GO_ADULT_BEHAVIOR		137	-0.314335	-1.17323	0.214737	0.33736	1	9786	tags=28%, list=18%, signal=34%
GO_STEM_CELL_PROLIFERATION	GO_STEM_CELL_PROLIFERATION		125	-0.310383	-1.17315	0.238193	0.337112	1	9725	tags=30%, list=18%, signal=37%
GO_DETECTION_OF_CHEMICAL_STIMULUS_INVOLVED_IN_SENSORY_PERCEPTION_OF_TASTE	GO_DETECTION_OF_CHEMICAL_STIMULUS_INVOLVED_IN_SENSORY_PERCEPTION_OF_TASTE		42	-0.361147	-1.17249	0.241525	0.337617	1	13817	tags=29%, list=25%, signal=38%
GO_REGULATION_OF_GLYCOPROTEIN_METABOLIC_PROCESS	GO_REGULATION_OF_GLYCOPROTEIN_METABOLIC_PROCESS		52	-0.339168	-1.17044	0.254545	0.339911	1	13089	tags=33%, list=24%, signal=43%
GO_CENTRAL_NERVOUS_SYSTEM_NEURON_DIFFERENTIATION	GO_CENTRAL_NERVOUS_SYSTEM_NEURON_DIFFERENTIATION		192	-0.307532	-1.16984	0.205882	0.340295	1	10206	tags=30%, list=18%, signal=36%
GO_INTRACELLULAR_ESTROGEN_RECEPTOR_SIGNALING_PATHWAY	GO_INTRACELLULAR_ESTROGEN_RECEPTOR_SIGNALING_PATHWAY		57	-0.360801	-1.16976	0.277433	0.340054	1	9088	tags=32%, list=16%, signal=38%
GO_POSITIVE_REGULATION_OF_DENDRITIC_SPINE_DEVELOPMENT	GO_POSITIVE_REGULATION_OF_DENDRITIC_SPINE_DEVELOPMENT		44	-0.389582	-1.16964	0.291667	0.339854	1	11746	tags=41%, list=21%, signal=52%
GO_NEGATIVE_REGULATION_OF_ENDOTHELIAL_CELL_APOPTOTIC_PROCESS	GO_NEGATIVE_REGULATION_OF_ENDOTHELIAL_CELL_APOPTOTIC_PROCESS		34	-0.383808	-1.16936	0.242972	0.339902	1	8562	tags=29%, list=15%, signal=35%
GO_ESTABLISHMENT_OF_PIGMENT_GRANULE_LOCALIZATION	GO_ESTABLISHMENT_OF_PIGMENT_GRANULE_LOCALIZATION		24	-0.411019	-1.16903	0.269978	0.339974	1	4583	tags=25%, list=8%, signal=27%
GO_RAB_PROTEIN_SIGNAL_TRANSDUCTION	GO_RAB_PROTEIN_SIGNAL_TRANSDUCTION		21	-0.414503	-1.16899	0.288382	0.339682	1	11426	tags=43%, list=21%, signal=54%
GO_METANEPHRIC_NEPHRON_DEVELOPMENT	GO_METANEPHRIC_NEPHRON_DEVELOPMENT		40	-0.360719	-1.16877	0.23	0.339607	1	3656	tags=18%, list=7%, signal=19%
GO_REGULATION_OF_CELL_GROWTH_INVOLVED_IN_CARDIAC_MUSCLE_CELL_DEVELOPMENT	GO_REGULATION_OF_CELL_GROWTH_INVOLVED_IN_CARDIAC_MUSCLE_CELL_DEVELOPMENT		22	-0.375748	-1.16867	0.221074	0.339392	1	9696	tags=27%, list=17%, signal=33%
GO_PROTEIN_ACTIVATION_CASCADE	GO_PROTEIN_ACTIVATION_CASCADE		28	-0.476124	-1.16815	0.330578	0.339699	1	8706	tags=36%, list=16%, signal=42%
GO_NUCLEUS_LOCALIZATION	GO_NUCLEUS_LOCALIZATION		28	-0.415298	-1.16743	0.300613	0.340267	1	6896	tags=32%, list=12%, signal=37%
GO_MULTICELLULAR_ORGANISM_AGING	GO_MULTICELLULAR_ORGANISM_AGING		35	-0.369045	-1.16726	0.264646	0.340112	1	15104	tags=43%, list=27%, signal=59%
GO_CARDIAC_ATRIUM_MORPHOGENESIS	GO_CARDIAC_ATRIUM_MORPHOGENESIS		30	-0.391329	-1.16676	0.259574	0.34042	1	7832	tags=37%, list=14%, signal=43%
GO_ESTABLISHMENT_OF_PROTEIN_LOCALIZATION_TO_PLASMA_MEMBRANE	GO_ESTABLISHMENT_OF_PROTEIN_LOCALIZATION_TO_PLASMA_MEMBRANE		60	-0.36202	-1.16638	0.2881	0.340597	1	8703	tags=33%, list=16%, signal=39%
GO_MAINTENANCE_OF_PROTEIN_LOCATION_IN_NUCLEUS	GO_MAINTENANCE_OF_PROTEIN_LOCATION_IN_NUCLEUS		23	-0.378167	-1.16638	0.268191	0.340245	1	3409	tags=22%, list=6%, signal=23%
GO_INTRACELLULAR_STEROL_TRANSPORT	GO_INTRACELLULAR_STEROL_TRANSPORT		24	-0.38588	-1.16617	0.259109	0.340143	1	5651	tags=33%, list=10%, signal=37%
GO_POSITIVE_REGULATION_OF_ENDOTHELIAL_CELL_PROLIFERATION	GO_POSITIVE_REGULATION_OF_ENDOTHELIAL_CELL_PROLIFERATION		108	-0.320766	-1.16607	0.251559	0.339939	1	8724	tags=27%, list=16%, signal=32%
GO_LOCALIZATION_WITHIN_MEMBRANE	GO_LOCALIZATION_WITHIN_MEMBRANE		97	-0.304795	-1.16498	0.255489	0.340974	1	5445	tags=19%, list=10%, signal=21%
GO_DEMETHYLATION	GO_DEMETHYLATION		72	-0.357133	-1.16496	0.284274	0.340649	1	14898	tags=40%, list=27%, signal=55%
GO_CARBOHYDRATE_TRANSMEMBRANE_TRANSPORT	GO_CARBOHYDRATE_TRANSMEMBRANE_TRANSPORT		116	-0.305927	-1.16431	0.210526	0.34113	1	9539	tags=25%, list=17%, signal=30%
GO_EXCITATORY_SYNAPSE_ASSEMBLY	GO_EXCITATORY_SYNAPSE_ASSEMBLY		26	-0.399218	-1.16356	0.268908	0.341787	1	6366	tags=31%, list=11%, signal=35%
GO_FEMALE_MEIOTIC_NUCLEAR_DIVISION	GO_FEMALE_MEIOTIC_NUCLEAR_DIVISION		31	-0.382953	-1.16276	0.297787	0.342451	1	4908	tags=26%, list=9%, signal=28%
GO_REGULATION_OF_MYELINATION	GO_REGULATION_OF_MYELINATION		46	-0.339364	-1.16248	0.267368	0.342474	1	5980	tags=26%, list=11%, signal=29%
GO_ENDOCRINE_SYSTEM_DEVELOPMENT	GO_ENDOCRINE_SYSTEM_DEVELOPMENT		125	-0.316865	-1.15979	0.223684	0.345645	1	13529	tags=37%, list=24%, signal=49%
GO_SPINAL_CORD_MOTOR_NEURON_DIFFERENTIATION	GO_SPINAL_CORD_MOTOR_NEURON_DIFFERENTIATION		35	-0.370716	-1.15877	0.235426	0.346673	1	12376	tags=37%, list=22%, signal=48%
GO_MICROVILLUS_ORGANIZATION	GO_MICROVILLUS_ORGANIZATION		25	-0.394411	-1.15845	0.272727	0.346687	1	8109	tags=36%, list=15%, signal=42%
GO_RETINA_HOMEOSTASIS	GO_RETINA_HOMEOSTASIS		78	-0.312828	-1.15811	0.221987	0.346762	1	9691	tags=26%, list=17%, signal=31%
GO_CYTOSKELETON_DEPENDENT_INTRACELLULAR_TRANSPORT	GO_CYTOSKELETON_DEPENDENT_INTRACELLULAR_TRANSPORT		200	-0.322763	-1.15748	0.273292	0.347257	1	8219	tags=27%, list=15%, signal=32%
GO_GLUTAMATE_RECEPTOR_SIGNALING_PATHWAY	GO_GLUTAMATE_RECEPTOR_SIGNALING_PATHWAY		101	-0.311964	-1.1574	0.240166	0.346998	1	12925	tags=33%, list=23%, signal=43%
GO_REGULATION_OF_HISTONE_DEACETYLATION	GO_REGULATION_OF_HISTONE_DEACETYLATION		29	-0.386305	-1.15637	0.257545	0.348042	1	8352	tags=34%, list=15%, signal=41%
GO_PHOSPHATIDYLINOSITOL_DEPHOSPHORYLATION	GO_PHOSPHATIDYLINOSITOL_DEPHOSPHORYLATION		31	-0.416168	-1.15595	0.305439	0.348199	1	6309	tags=26%, list=11%, signal=29%
GO_ENDOPLASMIC_RETICULUM_ORGANIZATION	GO_ENDOPLASMIC_RETICULUM_ORGANIZATION		71	-0.368111	-1.15581	0.311579	0.348041	1	10091	tags=34%, list=18%, signal=41%
GO_REGULATION_OF_TRANSLATION_IN_RESPONSE_TO_STRESS	GO_REGULATION_OF_TRANSLATION_IN_RESPONSE_TO_STRESS		20	-0.459689	-1.15448	0.327122	0.349408	1	12075	tags=50%, list=22%, signal=64%
GO_SODIUM_ION_TRANSMEMBRANE_TRANSPORT	GO_SODIUM_ION_TRANSMEMBRANE_TRANSPORT		174	-0.295182	-1.15353	0.222467	0.350292	1	6315	tags=18%, list=11%, signal=21%
GO_REGULATION_OF_MUSCLE_CELL_DIFFERENTIATION	GO_REGULATION_OF_MUSCLE_CELL_DIFFERENTIATION		175	-0.303011	-1.15323	0.254697	0.350319	1	9696	tags=25%, list=17%, signal=30%
GO_AMINE_CATABOLIC_PROCESS	GO_AMINE_CATABOLIC_PROCESS		22	-0.384418	-1.15127	0.267666	0.352557	1	8859	tags=32%, list=16%, signal=38%
GO_ESTABLISHMENT_OF_MITOCHONDRION_LOCALIZATION	GO_ESTABLISHMENT_OF_MITOCHONDRION_LOCALIZATION		26	-0.392531	-1.15118	0.285124	0.35231	1	10482	tags=38%, list=19%, signal=47%
GO_NEGATIVE_REGULATION_OF_ERK1_AND_ERK2_CASCADE	GO_NEGATIVE_REGULATION_OF_ERK1_AND_ERK2_CASCADE		75	-0.321479	-1.15093	0.257669	0.352249	1	5085	tags=20%, list=9%, signal=22%
GO_REGULATION_OF_PROTEIN_DEPHOSPHORYLATION	GO_REGULATION_OF_PROTEIN_DEPHOSPHORYLATION		138	-0.313995	-1.15088	0.296371	0.351985	1	10886	tags=31%, list=20%, signal=39%
GO_LIPID_STORAGE	GO_LIPID_STORAGE		79	-0.319178	-1.1503	0.249493	0.352428	1	11752	tags=35%, list=21%, signal=45%
GO_REGULATION_OF_PHOSPHATASE_ACTIVITY	GO_REGULATION_OF_PHOSPHATASE_ACTIVITY		174	-0.313527	-1.14945	0.287755	0.353234	1	11060	tags=33%, list=20%, signal=42%
GO_ORGANELLE_MEMBRANE_FUSION	GO_ORGANELLE_MEMBRANE_FUSION		107	-0.312821	-1.14867	0.269311	0.353893	1	11515	tags=36%, list=21%, signal=46%
GO_NEGATIVE_REGULATION_OF_ENDOTHELIAL_CELL_PROLIFERATION	GO_NEGATIVE_REGULATION_OF_ENDOTHELIAL_CELL_PROLIFERATION		69	-0.299681	-1.14849	0.240246	0.35379	1	10368	tags=20%, list=19%, signal=25%
GO_REGULATION_OF_MEMBRANE_PERMEABILITY	GO_REGULATION_OF_MEMBRANE_PERMEABILITY		83	-0.310636	-1.1481	0.285714	0.353984	1	6985	tags=27%, list=13%, signal=30%
GO_REGULATION_OF_CALCIUM_ION_TRANSMEMBRANE_TRANSPORTER_ACTIVITY	GO_REGULATION_OF_CALCIUM_ION_TRANSMEMBRANE_TRANSPORTER_ACTIVITY		87	-0.326076	-1.14676	0.257202	0.355421	1	10836	tags=34%, list=20%, signal=43%
GO_PHAGOSOME_ACIDIFICATION	GO_PHAGOSOME_ACIDIFICATION		28	-0.394433	-1.14656	0.290196	0.355312	1	7383	tags=29%, list=13%, signal=33%
GO_CELLULAR_RESPONSE_TO_KETONE	GO_CELLULAR_RESPONSE_TO_KETONE		97	-0.325613	-1.14439	0.27234	0.357867	1	11190	tags=36%, list=20%, signal=45%
GO_DEVELOPMENTAL_INDUCTION	GO_DEVELOPMENTAL_INDUCTION		36	-0.355444	-1.14435	0.278119	0.357567	1	9559	tags=31%, list=17%, signal=37%
GO_HEXOSE_CATABOLIC_PROCESS	GO_HEXOSE_CATABOLIC_PROCESS		56	-0.346062	-1.14356	0.274793	0.358315	1	8897	tags=30%, list=16%, signal=36%
GO_GLUTAMATE_SECRETION	GO_GLUTAMATE_SECRETION		45	-0.338365	-1.14301	0.260776	0.358685	1	10163	tags=33%, list=18%, signal=41%
GO_REGULATION_OF_ACTION_POTENTIAL	GO_REGULATION_OF_ACTION_POTENTIAL		54	-0.333635	-1.14258	0.286	0.358923	1	5506	tags=22%, list=10%, signal=25%
GO_REGULATION_OF_PROTEASOMAL_PROTEIN_CATABOLIC_PROCESS	GO_REGULATION_OF_PROTEASOMAL_PROTEIN_CATABOLIC_PROCESS		191	-0.311557	-1.142	0.289109	0.359352	1	9361	tags=29%, list=17%, signal=35%
GO_CALCIUM_MEDIATED_SIGNALING_USING_INTRACELLULAR_CALCIUM_SOURCE	GO_CALCIUM_MEDIATED_SIGNALING_USING_INTRACELLULAR_CALCIUM_SOURCE		22	-0.371218	-1.14139	0.283976	0.3598	1	7622	tags=27%, list=14%, signal=32%
GO_REGULATION_OF_LONG_TERM_NEURONAL_SYNAPTIC_PLASTICITY	GO_REGULATION_OF_LONG_TERM_NEURONAL_SYNAPTIC_PLASTICITY		25	-0.371459	-1.14095	0.274354	0.360065	1	8145	tags=24%, list=15%, signal=28%
GO_PIGMENT_GRANULE_LOCALIZATION	GO_PIGMENT_GRANULE_LOCALIZATION		26	-0.390839	-1.14021	0.32	0.360658	1	4583	tags=23%, list=8%, signal=25%
GO_MUSCLE_FIBER_DEVELOPMENT	GO_MUSCLE_FIBER_DEVELOPMENT		60	-0.400694	-1.13962	0.366472	0.361097	1	6607	tags=25%, list=12%, signal=28%
GO_INTRINSIC_APOPTOTIC_SIGNALING_PATHWAY_IN_RESPONSE_TO_ENDOPLASMIC_RETICULUM_STRESS	GO_INTRINSIC_APOPTOTIC_SIGNALING_PATHWAY_IN_RESPONSE_TO_ENDOPLASMIC_RETICULUM_STRESS		63	-0.342085	-1.13918	0.274841	0.361351	1	8011	tags=30%, list=14%, signal=35%
GO_CAMERA_TYPE_EYE_PHOTORECEPTOR_CELL_DIFFERENTIATION	GO_CAMERA_TYPE_EYE_PHOTORECEPTOR_CELL_DIFFERENTIATION		26	-0.388194	-1.13888	0.279661	0.361427	1	8109	tags=19%, list=15%, signal=23%
GO_REGULATION_OF_PEPTIDYL_LYSINE_ACETYLATION	GO_REGULATION_OF_PEPTIDYL_LYSINE_ACETYLATION		61	-0.329455	-1.13843	0.299587	0.361664	1	7194	tags=30%, list=13%, signal=34%
GO_LIPID_EXPORT_FROM_CELL	GO_LIPID_EXPORT_FROM_CELL		40	-0.350247	-1.13798	0.275362	0.361914	1	4448	tags=18%, list=8%, signal=19%
GO_MICROTUBULE_POLYMERIZATION	GO_MICROTUBULE_POLYMERIZATION		77	-0.341575	-1.13726	0.296681	0.362499	1	10223	tags=30%, list=18%, signal=37%
GO_PROTEIN_K48_LINKED_DEUBIQUITINATION	GO_PROTEIN_K48_LINKED_DEUBIQUITINATION		36	-0.405261	-1.13726	0.329876	0.362151	1	6197	tags=25%, list=11%, signal=28%
GO_NEGATIVE_REGULATION_OF_RELEASE_OF_CYTOCHROME_C_FROM_MITOCHONDRIA	GO_NEGATIVE_REGULATION_OF_RELEASE_OF_CYTOCHROME_C_FROM_MITOCHONDRIA		21	-0.383874	-1.13684	0.291139	0.362373	1	9349	tags=38%, list=17%, signal=46%
GO_EMBRYONIC_HINDLIMB_MORPHOGENESIS	GO_EMBRYONIC_HINDLIMB_MORPHOGENESIS		29	-0.403311	-1.13674	0.309322	0.362169	1	7719	tags=34%, list=14%, signal=40%
GO_NEGATIVE_REGULATION_OF_LIPID_LOCALIZATION	GO_NEGATIVE_REGULATION_OF_LIPID_LOCALIZATION		58	-0.321483	-1.13619	0.249485	0.362577	1	11344	tags=26%, list=20%, signal=32%
GO_SOMATIC_STEM_CELL_POPULATION_MAINTENANCE	GO_SOMATIC_STEM_CELL_POPULATION_MAINTENANCE		75	-0.318625	-1.13607	0.263692	0.362383	1	11903	tags=29%, list=21%, signal=37%
GO_RIBONUCLEOSIDE_METABOLIC_PROCESS	GO_RIBONUCLEOSIDE_METABOLIC_PROCESS		72	-0.306614	-1.13589	0.260784	0.36229	1	10266	tags=29%, list=19%, signal=36%
GO_REGULATION_OF_HEART_RATE_BY_CARDIAC_CONDUCTION	GO_REGULATION_OF_HEART_RATE_BY_CARDIAC_CONDUCTION		39	-0.327604	-1.13584	0.258964	0.362	1	10486	tags=38%, list=19%, signal=47%
GO_INSULIN_RECEPTOR_SIGNALING_PATHWAY	GO_INSULIN_RECEPTOR_SIGNALING_PATHWAY		143	-0.307878	-1.13569	0.280242	0.361837	1	8020	tags=24%, list=14%, signal=28%
GO_REGULATION_OF_TRIGLYCERIDE_BIOSYNTHETIC_PROCESS	GO_REGULATION_OF_TRIGLYCERIDE_BIOSYNTHETIC_PROCESS		21	-0.3831	-1.13466	0.28903	0.362811	1	9113	tags=38%, list=16%, signal=46%
GO_MONOSACCHARIDE_CATABOLIC_PROCESS	GO_MONOSACCHARIDE_CATABOLIC_PROCESS		66	-0.330559	-1.13408	0.285124	0.363192	1	8897	tags=30%, list=16%, signal=36%
GO_AMINO_ACID_ACTIVATION	GO_AMINO_ACID_ACTIVATION		49	-0.418057	-1.13369	0.357564	0.36334	1	11528	tags=41%, list=21%, signal=51%
GO_REGULATION_OF_ORGANELLE_ASSEMBLY	GO_REGULATION_OF_ORGANELLE_ASSEMBLY		192	-0.314998	-1.13358	0.30625	0.363137	1	11291	tags=33%, list=20%, signal=42%
GO_PEPTIDYL_LYSINE_TRIMETHYLATION	GO_PEPTIDYL_LYSINE_TRIMETHYLATION		53	-0.395453	-1.13301	0.347059	0.363528	1	13551	tags=38%, list=24%, signal=50%
GO_BINDING_OF_SPERM_TO_ZONA_PELLUCIDA	GO_BINDING_OF_SPERM_TO_ZONA_PELLUCIDA		43	-0.329609	-1.13243	0.276639	0.363949	1	10529	tags=30%, list=19%, signal=37%
GO_DNA_MODIFICATION	GO_DNA_MODIFICATION		116	-0.311329	-1.13242	0.288577	0.363593	1	8655	tags=25%, list=16%, signal=30%
GO_PHOSPHATIDYLINOSITOL_PHOSPHORYLATION	GO_PHOSPHATIDYLINOSITOL_PHOSPHORYLATION		57	-0.367618	-1.13223	0.314103	0.363482	1	8172	tags=26%, list=15%, signal=31%
GO_RESPONSE_TO_CATECHOLAMINE	GO_RESPONSE_TO_CATECHOLAMINE		110	-0.288098	-1.13106	0.231388	0.364643	1	7242	tags=19%, list=13%, signal=22%
GO_REGULATION_OF_ACTIVIN_RECEPTOR_SIGNALING_PATHWAY	GO_REGULATION_OF_ACTIVIN_RECEPTOR_SIGNALING_PATHWAY		24	-0.389623	-1.13105	0.281385	0.364322	1	5076	tags=25%, list=9%, signal=28%
GO_NEGATIVE_REGULATION_OF_EPITHELIAL_CELL_PROLIFERATION	GO_NEGATIVE_REGULATION_OF_EPITHELIAL_CELL_PROLIFERATION		161	-0.279401	-1.13077	0.241015	0.36435	1	9052	tags=23%, list=16%, signal=27%
GO_NEGATIVE_REGULATION_OF_STRIATED_MUSCLE_CELL_DIFFERENTIATION	GO_NEGATIVE_REGULATION_OF_STRIATED_MUSCLE_CELL_DIFFERENTIATION		43	-0.347142	-1.13047	0.288719	0.364381	1	8996	tags=28%, list=16%, signal=33%
GO_REGULATION_OF_AMPA_RECEPTOR_ACTIVITY	GO_REGULATION_OF_AMPA_RECEPTOR_ACTIVITY		25	-0.379564	-1.13047	0.293307	0.364032	1	1732	tags=12%, list=3%, signal=12%
GO_AMINO_SUGAR_METABOLIC_PROCESS	GO_AMINO_SUGAR_METABOLIC_PROCESS		41	-0.328889	-1.13026	0.283168	0.363969	1	8502	tags=32%, list=15%, signal=37%
GO_MEIOTIC_CHROMOSOME_SEPARATION	GO_MEIOTIC_CHROMOSOME_SEPARATION		25	-0.38765	-1.1302	0.325726	0.363701	1	5389	tags=24%, list=10%, signal=27%
GO_HINDBRAIN_MORPHOGENESIS	GO_HINDBRAIN_MORPHOGENESIS		44	-0.358072	-1.13017	0.287879	0.363382	1	8867	tags=27%, list=16%, signal=32%
GO_DORSAL_VENTRAL_NEURAL_TUBE_PATTERNING	GO_DORSAL_VENTRAL_NEURAL_TUBE_PATTERNING		24	-0.407465	-1.13016	0.3125	0.363038	1	3738	tags=21%, list=7%, signal=22%
GO_NUCLEOTIDE_EXCISION_REPAIR_DNA_DAMAGE_RECOGNITION	GO_NUCLEOTIDE_EXCISION_REPAIR_DNA_DAMAGE_RECOGNITION		23	-0.408095	-1.1294	0.32	0.363685	1	8671	tags=39%, list=16%, signal=46%
GO_SYNAPTIC_VESICLE_LOCALIZATION	GO_SYNAPTIC_VESICLE_LOCALIZATION		57	-0.340623	-1.12896	0.291837	0.363912	1	10758	tags=42%, list=19%, signal=52%
GO_ENDOTHELIUM_DEVELOPMENT	GO_ENDOTHELIUM_DEVELOPMENT		131	-0.319192	-1.12896	0.304878	0.36357	1	7832	tags=27%, list=14%, signal=31%
GO_REGULATION_OF_STRIATED_MUSCLE_CONTRACTION	GO_REGULATION_OF_STRIATED_MUSCLE_CONTRACTION		95	-0.322479	-1.12856	0.298805	0.363771	1	6925	tags=25%, list=12%, signal=29%
GO_POSITIVE_REGULATION_OF_GLUCOSE_TRANSMEMBRANE_TRANSPORT	GO_POSITIVE_REGULATION_OF_GLUCOSE_TRANSMEMBRANE_TRANSPORT		44	-0.362398	-1.12853	0.278557	0.363456	1	9349	tags=23%, list=17%, signal=27%
GO_REGULATION_OF_CALCIUM_ION_TRANSMEMBRANE_TRANSPORT	GO_REGULATION_OF_CALCIUM_ION_TRANSMEMBRANE_TRANSPORT		148	-0.30398	-1.12809	0.269547	0.36372	1	10836	tags=31%, list=20%, signal=39%
GO_RETROGRADE_AXONAL_TRANSPORT	GO_RETROGRADE_AXONAL_TRANSPORT		20	-0.42214	-1.12805	0.339468	0.363419	1	8074	tags=35%, list=15%, signal=41%
GO_GENETIC_IMPRINTING	GO_GENETIC_IMPRINTING		27	-0.385555	-1.12756	0.296907	0.363708	1	15767	tags=41%, list=28%, signal=57%
GO_NEURON_FATE_SPECIFICATION	GO_NEURON_FATE_SPECIFICATION		34	-0.363675	-1.12729	0.250518	0.363706	1	11298	tags=26%, list=20%, signal=33%
GO_CELLULAR_RESPONSE_TO_ALCOHOL	GO_CELLULAR_RESPONSE_TO_ALCOHOL		91	-0.323294	-1.12696	0.292339	0.363796	1	11022	tags=34%, list=20%, signal=42%
GO_RESPONSE_TO_LEPTIN	GO_RESPONSE_TO_LEPTIN		24	-0.382039	-1.12662	0.309917	0.363902	1	1428	tags=17%, list=3%, signal=17%
GO_POSITIVE_REGULATION_OF_CALCIUM_ION_TRANSPORT_INTO_CYTOSOL	GO_POSITIVE_REGULATION_OF_CALCIUM_ION_TRANSPORT_INTO_CYTOSOL		54	-0.333588	-1.12519	0.295455	0.365452	1	14371	tags=39%, list=26%, signal=52%
GO_POSITIVE_REGULATION_OF_RECEPTOR_INTERNALIZATION	GO_POSITIVE_REGULATION_OF_RECEPTOR_INTERNALIZATION		25	-0.359316	-1.12479	0.281513	0.365612	1	12898	tags=40%, list=23%, signal=52%
GO_ORGANELLE_DISASSEMBLY	GO_ORGANELLE_DISASSEMBLY		110	-0.330806	-1.12452	0.318275	0.365653	1	11828	tags=38%, list=21%, signal=48%
GO_ADENYLATE_CYCLASE_ACTIVATING_G_PROTEIN_COUPLED_RECEPTOR_SIGNALING_PATHWAY	GO_ADENYLATE_CYCLASE_ACTIVATING_G_PROTEIN_COUPLED_RECEPTOR_SIGNALING_PATHWAY		144	-0.311806	-1.12434	0.26087	0.365548	1	14402	tags=37%, list=26%, signal=50%
GO_POSITIVE_REGULATION_OF_RELEASE_OF_SEQUESTERED_CALCIUM_ION_INTO_CYTOSOL	GO_POSITIVE_REGULATION_OF_RELEASE_OF_SEQUESTERED_CALCIUM_ION_INTO_CYTOSOL		40	-0.34347	-1.12422	0.295117	0.365369	1	14371	tags=43%, list=26%, signal=57%
GO_PROTEIN_STABILIZATION	GO_PROTEIN_STABILIZATION		186	-0.299293	-1.12326	0.329193	0.366268	1	9016	tags=24%, list=16%, signal=28%
GO_GOLGI_TO_PLASMA_MEMBRANE_PROTEIN_TRANSPORT	GO_GOLGI_TO_PLASMA_MEMBRANE_PROTEIN_TRANSPORT		40	-0.370117	-1.12305	0.323529	0.36621	1	10163	tags=40%, list=18%, signal=49%
GO_POSTSYNAPSE_ASSEMBLY	GO_POSTSYNAPSE_ASSEMBLY		31	-0.381365	-1.12302	0.311966	0.365894	1	2495	tags=19%, list=4%, signal=20%
GO_MICROTUBULE_ANCHORING	GO_MICROTUBULE_ANCHORING		26	-0.441881	-1.123	0.359833	0.365573	1	6352	tags=31%, list=11%, signal=35%
GO_MEIOTIC_CELL_CYCLE_PROCESS	GO_MEIOTIC_CELL_CYCLE_PROCESS		193	-0.298369	-1.12285	0.287449	0.365419	1	9077	tags=25%, list=16%, signal=30%
GO_NEURAL_CREST_CELL_DIFFERENTIATION	GO_NEURAL_CREST_CELL_DIFFERENTIATION		89	-0.314505	-1.1224	0.291581	0.365679	1	4999	tags=20%, list=9%, signal=22%
GO_EXECUTION_PHASE_OF_APOPTOSIS	GO_EXECUTION_PHASE_OF_APOPTOSIS		94	-0.287424	-1.12214	0.259259	0.365663	1	11426	tags=31%, list=21%, signal=39%
GO_SMOOTH_MUSCLE_TISSUE_DEVELOPMENT	GO_SMOOTH_MUSCLE_TISSUE_DEVELOPMENT		23	-0.422083	-1.12178	0.337423	0.365785	1	7832	tags=30%, list=14%, signal=35%
GO_RESPONSE_TO_ORGANOPHOSPHORUS	GO_RESPONSE_TO_ORGANOPHOSPHORUS		134	-0.294341	-1.12163	0.286598	0.365662	1	4989	tags=18%, list=9%, signal=20%
GO_POSITIVE_REGULATION_OF_PROTEIN_MODIFICATION_BY_SMALL_PROTEIN_CONJUGATION_OR_REMOVAL	GO_POSITIVE_REGULATION_OF_PROTEIN_MODIFICATION_BY_SMALL_PROTEIN_CONJUGATION_OR_REMOVAL		140	-0.326163	-1.12129	0.330561	0.365755	1	8352	tags=29%, list=15%, signal=34%
GO_POSITIVE_REGULATION_OF_BIOMINERALIZATION	GO_POSITIVE_REGULATION_OF_BIOMINERALIZATION		48	-0.363212	-1.12055	0.292373	0.366452	1	4557	tags=21%, list=8%, signal=23%
GO_NEUTRAL_LIPID_CATABOLIC_PROCESS	GO_NEUTRAL_LIPID_CATABOLIC_PROCESS		48	-0.341644	-1.12052	0.283951	0.366147	1	10664	tags=27%, list=19%, signal=33%
GO_REGULATION_OF_ENDOTHELIAL_CELL_DIFFERENTIATION	GO_REGULATION_OF_ENDOTHELIAL_CELL_DIFFERENTIATION		44	-0.342968	-1.12043	0.303748	0.365923	1	5151	tags=23%, list=9%, signal=25%
GO_POSITIVE_REGULATION_OF_NUCLEOTIDE_BIOSYNTHETIC_PROCESS	GO_POSITIVE_REGULATION_OF_NUCLEOTIDE_BIOSYNTHETIC_PROCESS		25	-0.355226	-1.12032	0.29065	0.365721	1	9474	tags=28%, list=17%, signal=34%
GO_PHOTOTRANSDUCTION	GO_PHOTOTRANSDUCTION		59	-0.302406	-1.12019	0.270613	0.365551	1	12569	tags=27%, list=23%, signal=35%
GO_SEX_DETERMINATION	GO_SEX_DETERMINATION		25	-0.366243	-1.11971	0.290526	0.365839	1	4972	tags=16%, list=9%, signal=18%
GO_NEURONAL_STEM_CELL_POPULATION_MAINTENANCE	GO_NEURONAL_STEM_CELL_POPULATION_MAINTENANCE		23	-0.405896	-1.11961	0.323108	0.36562	1	6672	tags=26%, list=12%, signal=30%
GO_CEREBELLAR_CORTEX_DEVELOPMENT	GO_CEREBELLAR_CORTEX_DEVELOPMENT		50	-0.342843	-1.11919	0.288421	0.365864	1	9116	tags=32%, list=16%, signal=38%
GO_POSITIVE_REGULATION_OF_FAT_CELL_DIFFERENTIATION	GO_POSITIVE_REGULATION_OF_FAT_CELL_DIFFERENTIATION		69	-0.318177	-1.11894	0.287755	0.365883	1	13689	tags=42%, list=25%, signal=56%
GO_VASODILATION	GO_VASODILATION		34	-0.3413	-1.11849	0.26875	0.366167	1	1668	tags=12%, list=3%, signal=12%
GO_REGULATION_OF_ENDOPLASMIC_RETICULUM_UNFOLDED_PROTEIN_RESPONSE	GO_REGULATION_OF_ENDOPLASMIC_RETICULUM_UNFOLDED_PROTEIN_RESPONSE		28	-0.402077	-1.11828	0.340726	0.366086	1	6898	tags=25%, list=12%, signal=29%
GO_DIGESTIVE_SYSTEM_DEVELOPMENT	GO_DIGESTIVE_SYSTEM_DEVELOPMENT		144	-0.320484	-1.11752	0.282655	0.366768	1	5894	tags=20%, list=11%, signal=22%
GO_NEGATIVE_REGULATION_OF_MUSCLE_CONTRACTION	GO_NEGATIVE_REGULATION_OF_MUSCLE_CONTRACTION		28	-0.368647	-1.11733	0.322068	0.366684	1	3272	tags=18%, list=6%, signal=19%
GO_PHOSPHOLIPID_TRANSPORT	GO_PHOSPHOLIPID_TRANSPORT		91	-0.304901	-1.11679	0.290123	0.367011	1	7753	tags=25%, list=14%, signal=29%
GO_REGULATION_OF_DENDRITE_DEVELOPMENT	GO_REGULATION_OF_DENDRITE_DEVELOPMENT		155	-0.314096	-1.11643	0.318087	0.36713	1	8140	tags=26%, list=15%, signal=31%
GO_REGULATION_OF_GONAD_DEVELOPMENT	GO_REGULATION_OF_GONAD_DEVELOPMENT		20	-0.366356	-1.11532	0.283525	0.368249	1	3878	tags=20%, list=7%, signal=21%
GO_RESPONSE_TO_LITHIUM_ION	GO_RESPONSE_TO_LITHIUM_ION		23	-0.3574	-1.1151	0.314402	0.368205	1	7894	tags=26%, list=14%, signal=30%
GO_NEGATIVE_REGULATION_OF_SMOOTH_MUSCLE_CELL_DIFFERENTIATION	GO_NEGATIVE_REGULATION_OF_SMOOTH_MUSCLE_CELL_DIFFERENTIATION		22	-0.38631	-1.11502	0.310621	0.367969	1	7054	tags=27%, list=13%, signal=31%
GO_REGULATION_OF_DENDRITE_MORPHOGENESIS	GO_REGULATION_OF_DENDRITE_MORPHOGENESIS		95	-0.325429	-1.11498	0.331933	0.367682	1	8867	tags=32%, list=16%, signal=38%
GO_TRANSLATIONAL_ELONGATION	GO_TRANSLATIONAL_ELONGATION		135	-0.392075	-1.11472	0.377551	0.367686	1	10631	tags=36%, list=19%, signal=45%
GO_AXON_ENSHEATHMENT_IN_CENTRAL_NERVOUS_SYSTEM	GO_AXON_ENSHEATHMENT_IN_CENTRAL_NERVOUS_SYSTEM		23	-0.359051	-1.11466	0.31893	0.367428	1	11298	tags=39%, list=20%, signal=49%
GO_PHOSPHATIDYLETHANOLAMINE_METABOLIC_PROCESS	GO_PHOSPHATIDYLETHANOLAMINE_METABOLIC_PROCESS		30	-0.348563	-1.11437	0.29899	0.367476	1	9147	tags=30%, list=16%, signal=36%
GO_POST_EMBRYONIC_DEVELOPMENT	GO_POST_EMBRYONIC_DEVELOPMENT		86	-0.332819	-1.11416	0.323829	0.367421	1	10687	tags=31%, list=19%, signal=39%
GO_VESICLE_DOCKING	GO_VESICLE_DOCKING		65	-0.315068	-1.113	0.314402	0.368678	1	8493	tags=32%, list=15%, signal=38%
GO_REGULATION_OF_MUSCLE_ORGAN_DEVELOPMENT	GO_REGULATION_OF_MUSCLE_ORGAN_DEVELOPMENT		153	-0.302392	-1.11275	0.286938	0.368656	1	11182	tags=29%, list=20%, signal=37%
GO_POSITIVE_REGULATION_OF_LIPID_KINASE_ACTIVITY	GO_POSITIVE_REGULATION_OF_LIPID_KINASE_ACTIVITY		37	-0.376054	-1.11204	0.335354	0.369273	1	5860	tags=24%, list=11%, signal=27%
GO_REGULATION_OF_SYNAPTIC_TRANSMISSION_GLUTAMATERGIC	GO_REGULATION_OF_SYNAPTIC_TRANSMISSION_GLUTAMATERGIC		72	-0.315219	-1.111	0.265957	0.370288	1	13055	tags=33%, list=24%, signal=44%
GO_NEGATIVE_REGULATION_OF_CELLULAR_PROTEIN_CATABOLIC_PROCESS	GO_NEGATIVE_REGULATION_OF_CELLULAR_PROTEIN_CATABOLIC_PROCESS		86	-0.322723	-1.11085	0.315369	0.37015	1	9698	tags=33%, list=17%, signal=39%
GO_PROTEIN_DEMETHYLATION	GO_PROTEIN_DEMETHYLATION		32	-0.412798	-1.11046	0.381818	0.370306	1	14441	tags=41%, list=26%, signal=55%
GO_SKELETAL_MUSCLE_ORGAN_DEVELOPMENT	GO_SKELETAL_MUSCLE_ORGAN_DEVELOPMENT		167	-0.312766	-1.11021	0.322772	0.370303	1	6672	tags=20%, list=12%, signal=23%
GO_SYNAPTIC_TRANSMISSION_GABAERGIC	GO_SYNAPTIC_TRANSMISSION_GABAERGIC		48	-0.342697	-1.10996	0.317697	0.370285	1	13055	tags=42%, list=24%, signal=54%
GO_REGULATION_OF_UBIQUITIN_PROTEIN_TRANSFERASE_ACTIVITY	GO_REGULATION_OF_UBIQUITIN_PROTEIN_TRANSFERASE_ACTIVITY		54	-0.343765	-1.10986	0.35102	0.370066	1	11752	tags=33%, list=21%, signal=42%
GO_ENDOCRINE_PANCREAS_DEVELOPMENT	GO_ENDOCRINE_PANCREAS_DEVELOPMENT		45	-0.345468	-1.10967	0.27409	0.369971	1	13529	tags=44%, list=24%, signal=59%
GO_REGULATION_OF_MITOCHONDRIAL_MEMBRANE_PERMEABILITY_INVOLVED_IN_APOPTOTIC_PROCESS	GO_REGULATION_OF_MITOCHONDRIAL_MEMBRANE_PERMEABILITY_INVOLVED_IN_APOPTOTIC_PROCESS		61	-0.316672	-1.10957	0.320675	0.369782	1	6985	tags=26%, list=13%, signal=30%
GO_NEGATIVE_REGULATION_OF_GTPASE_ACTIVITY	GO_NEGATIVE_REGULATION_OF_GTPASE_ACTIVITY		47	-0.327896	-1.10941	0.332	0.369674	1	6655	tags=26%, list=12%, signal=29%
GO_RESPONSE_TO_ATP	GO_RESPONSE_TO_ATP		34	-0.35452	-1.10855	0.321503	0.37045	1	4167	tags=18%, list=8%, signal=19%
GO_HINDLIMB_MORPHOGENESIS	GO_HINDLIMB_MORPHOGENESIS		37	-0.364257	-1.10809	0.32839	0.370755	1	7719	tags=30%, list=14%, signal=35%
GO_MUSCLE_HYPERTROPHY_IN_RESPONSE_TO_STRESS	GO_MUSCLE_HYPERTROPHY_IN_RESPONSE_TO_STRESS		28	-0.373287	-1.10799	0.320833	0.370572	1	3970	tags=18%, list=7%, signal=19%
GO_MEMBRANE_FUSION	GO_MEMBRANE_FUSION		169	-0.287507	-1.10768	0.305556	0.370696	1	10796	tags=31%, list=19%, signal=38%
GO_COBALAMIN_METABOLIC_PROCESS	GO_COBALAMIN_METABOLIC_PROCESS		22	-0.363928	-1.10766	0.306554	0.370384	1	12456	tags=45%, list=22%, signal=59%
GO_CELLULAR_RESPONSE_TO_CAMP	GO_CELLULAR_RESPONSE_TO_CAMP		53	-0.32944	-1.10731	0.329087	0.37055	1	2467	tags=15%, list=4%, signal=16%
GO_POSITIVE_REGULATION_OF_CYCLASE_ACTIVITY	GO_POSITIVE_REGULATION_OF_CYCLASE_ACTIVITY		22	-0.375758	-1.10724	0.329832	0.370304	1	13300	tags=36%, list=24%, signal=48%
GO_NEGATIVE_REGULATION_OF_SIGNALING_RECEPTOR_ACTIVITY	GO_NEGATIVE_REGULATION_OF_SIGNALING_RECEPTOR_ACTIVITY		57	-0.326395	-1.10711	0.305907	0.370143	1	11252	tags=32%, list=20%, signal=40%
GO_REGULATION_OF_ENDOTHELIAL_CELL_CHEMOTAXIS	GO_REGULATION_OF_ENDOTHELIAL_CELL_CHEMOTAXIS		24	-0.354328	-1.10687	0.316633	0.370106	1	7764	tags=29%, list=14%, signal=34%
GO_COLLAGEN_BIOSYNTHETIC_PROCESS	GO_COLLAGEN_BIOSYNTHETIC_PROCESS		48	-0.338422	-1.10624	0.322449	0.370637	1	7832	tags=27%, list=14%, signal=32%
GO_GAMMA_AMINOBUTYRIC_ACID_SIGNALING_PATHWAY	GO_GAMMA_AMINOBUTYRIC_ACID_SIGNALING_PATHWAY		27	-0.357523	-1.10619	0.312369	0.370369	1	3891	tags=22%, list=7%, signal=24%
GO_NEURAL_RETINA_DEVELOPMENT	GO_NEURAL_RETINA_DEVELOPMENT		72	-0.313352	-1.10619	0.267544	0.370046	1	8109	tags=24%, list=15%, signal=28%
GO_PERK_MEDIATED_UNFOLDED_PROTEIN_RESPONSE	GO_PERK_MEDIATED_UNFOLDED_PROTEIN_RESPONSE		21	-0.433065	-1.10584	0.350806	0.37015	1	17218	tags=52%, list=31%, signal=76%
GO_POSITIVE_REGULATION_OF_STEROL_TRANSPORT	GO_POSITIVE_REGULATION_OF_STEROL_TRANSPORT		29	-0.362253	-1.10583	0.327044	0.369827	1	12903	tags=45%, list=23%, signal=58%
GO_REGULATION_OF_DNA_DAMAGE_RESPONSE_SIGNAL_TRANSDUCTION_BY_P53_CLASS_MEDIATOR	GO_REGULATION_OF_DNA_DAMAGE_RESPONSE_SIGNAL_TRANSDUCTION_BY_P53_CLASS_MEDIATOR		34	-0.352427	-1.10516	0.334043	0.370422	1	9856	tags=32%, list=18%, signal=39%
GO_TELOMERE_CAPPING	GO_TELOMERE_CAPPING		55	-0.347792	-1.10491	0.35503	0.370419	1	9733	tags=27%, list=18%, signal=33%
GO_MUSCLE_ORGAN_MORPHOGENESIS	GO_MUSCLE_ORGAN_MORPHOGENESIS		81	-0.356484	-1.10426	0.335329	0.370935	1	10464	tags=27%, list=19%, signal=33%
GO_RESPONSE_TO_MUSCLE_ACTIVITY	GO_RESPONSE_TO_MUSCLE_ACTIVITY		24	-0.368916	-1.1041	0.336756	0.370814	1	8296	tags=38%, list=15%, signal=44%
GO_PHOSPHOLIPID_DEPHOSPHORYLATION	GO_PHOSPHOLIPID_DEPHOSPHORYLATION		45	-0.350334	-1.10373	0.339286	0.370951	1	7174	tags=27%, list=13%, signal=31%
GO_PURINE_NUCLEOSIDE_BIOSYNTHETIC_PROCESS	GO_PURINE_NUCLEOSIDE_BIOSYNTHETIC_PROCESS		23	-0.37307	-1.10372	0.341651	0.370629	1	3437	tags=22%, list=6%, signal=23%
GO_POSITIVE_REGULATION_OF_POTASSIUM_ION_TRANSPORT	GO_POSITIVE_REGULATION_OF_POTASSIUM_ION_TRANSPORT		45	-0.329629	-1.10371	0.290909	0.370315	1	4894	tags=20%, list=9%, signal=22%
GO_LINOLEIC_ACID_METABOLIC_PROCESS	GO_LINOLEIC_ACID_METABOLIC_PROCESS		21	-0.373473	-1.10351	0.294239	0.370228	1	6395	tags=29%, list=12%, signal=32%
GO_MULTICELLULAR_ORGANISMAL_RESPONSE_TO_STRESS	GO_MULTICELLULAR_ORGANISMAL_RESPONSE_TO_STRESS		76	-0.306546	-1.10301	0.277311	0.37049	1	11279	tags=28%, list=20%, signal=35%
GO_ACTIVATION_OF_ADENYLATE_CYCLASE_ACTIVITY	GO_ACTIVATION_OF_ADENYLATE_CYCLASE_ACTIVITY		38	-0.346024	-1.10299	0.306773	0.370197	1	15010	tags=45%, list=27%, signal=61%
GO_VENTRICULAR_SEPTUM_MORPHOGENESIS	GO_VENTRICULAR_SEPTUM_MORPHOGENESIS		44	-0.365542	-1.10272	0.337423	0.370227	1	10464	tags=39%, list=19%, signal=48%
GO_SMOOTH_MUSCLE_CELL_PROLIFERATION	GO_SMOOTH_MUSCLE_CELL_PROLIFERATION		161	-0.293186	-1.10194	0.311301	0.370915	1	9351	tags=23%, list=17%, signal=28%
GO_POSITIVE_REGULATION_OF_REGULATED_SECRETORY_PATHWAY	GO_POSITIVE_REGULATION_OF_REGULATED_SECRETORY_PATHWAY		56	-0.305166	-1.1017	0.311245	0.370908	1	9809	tags=32%, list=18%, signal=39%
GO_GLYCEROPHOSPHOLIPID_CATABOLIC_PROCESS	GO_GLYCEROPHOSPHOLIPID_CATABOLIC_PROCESS		32	-0.354988	-1.1016	0.314465	0.370698	1	12386	tags=38%, list=22%, signal=48%
GO_VIRAL_BUDDING_VIA_HOST_ESCRT_COMPLEX	GO_VIRAL_BUDDING_VIA_HOST_ESCRT_COMPLEX		21	-0.417069	-1.10122	0.362764	0.37084	1	9107	tags=29%, list=16%, signal=34%
GO_REGULATION_OF_GLUTAMATE_RECEPTOR_SIGNALING_PATHWAY	GO_REGULATION_OF_GLUTAMATE_RECEPTOR_SIGNALING_PATHWAY		64	-0.320579	-1.10049	0.283871	0.371493	1	12232	tags=31%, list=22%, signal=40%
GO_SPLICEOSOMAL_SNRNP_ASSEMBLY	GO_SPLICEOSOMAL_SNRNP_ASSEMBLY		54	-0.360653	-1.10011	0.366936	0.371651	1	13199	tags=37%, list=24%, signal=49%
GO_DETECTION_OF_LIGHT_STIMULUS	GO_DETECTION_OF_LIGHT_STIMULUS		75	-0.29042	-1.09971	0.291489	0.371813	1	12569	tags=25%, list=23%, signal=33%
GO_POSITIVE_REGULATION_OF_OSSIFICATION	GO_POSITIVE_REGULATION_OF_OSSIFICATION		90	-0.322286	-1.09817	0.327696	0.3735	1	7646	tags=26%, list=14%, signal=30%
GO_INTRASPECIES_INTERACTION_BETWEEN_ORGANISMS	GO_INTRASPECIES_INTERACTION_BETWEEN_ORGANISMS		53	-0.329306	-1.09814	0.314534	0.373194	1	2495	tags=13%, list=4%, signal=14%
GO_POSITIVE_REGULATION_OF_PROTEIN_ACETYLATION	GO_POSITIVE_REGULATION_OF_PROTEIN_ACETYLATION		43	-0.324013	-1.09806	0.338235	0.372994	1	6963	tags=28%, list=13%, signal=32%
GO_AMINO_ACID_TRANSMEMBRANE_TRANSPORT	GO_AMINO_ACID_TRANSMEMBRANE_TRANSPORT		92	-0.294738	-1.0974	0.291913	0.373577	1	8242	tags=24%, list=15%, signal=28%
GO_POSITIVE_REGULATION_OF_TRIGLYCERIDE_METABOLIC_PROCESS	GO_POSITIVE_REGULATION_OF_TRIGLYCERIDE_METABOLIC_PROCESS		22	-0.380678	-1.09723	0.356394	0.373471	1	10664	tags=45%, list=19%, signal=56%
GO_CELLULAR_IRON_ION_HOMEOSTASIS	GO_CELLULAR_IRON_ION_HOMEOSTASIS		70	-0.307665	-1.09665	0.323413	0.373917	1	15232	tags=40%, list=27%, signal=55%
GO_CELLULAR_RESPONSE_TO_STARVATION	GO_CELLULAR_RESPONSE_TO_STARVATION		162	-0.30457	-1.09584	0.330578	0.374663	1	11756	tags=34%, list=21%, signal=43%
GO_REGULATION_OF_LIPID_KINASE_ACTIVITY	GO_REGULATION_OF_LIPID_KINASE_ACTIVITY		67	-0.339784	-1.09579	0.341719	0.374403	1	6644	tags=21%, list=12%, signal=24%
GO_NEGATIVE_REGULATION_OF_EPITHELIAL_CELL_APOPTOTIC_PROCESS	GO_NEGATIVE_REGULATION_OF_EPITHELIAL_CELL_APOPTOTIC_PROCESS		48	-0.332142	-1.09495	0.297297	0.375229	1	8959	tags=27%, list=16%, signal=32%
GO_ACTIN_NUCLEATION	GO_ACTIN_NUCLEATION		53	-0.326022	-1.09453	0.31992	0.375398	1	3821	tags=13%, list=7%, signal=14%
GO_EPIDERMIS_MORPHOGENESIS	GO_EPIDERMIS_MORPHOGENESIS		32	-0.357364	-1.09451	0.328542	0.375111	1	7786	tags=31%, list=14%, signal=36%
GO_AUDITORY_RECEPTOR_CELL_DEVELOPMENT	GO_AUDITORY_RECEPTOR_CELL_DEVELOPMENT		21	-0.366216	-1.09449	0.3375	0.3748	1	7764	tags=29%, list=14%, signal=33%
GO_PHOSPHATIDYLCHOLINE_METABOLIC_PROCESS	GO_PHOSPHATIDYLCHOLINE_METABOLIC_PROCESS		88	-0.286473	-1.09421	0.297189	0.374861	1	9147	tags=27%, list=16%, signal=33%
GO_ENDOCHONDRAL_BONE_MORPHOGENESIS	GO_ENDOCHONDRAL_BONE_MORPHOGENESIS		55	-0.334949	-1.09414	0.305439	0.374631	1	6471	tags=24%, list=12%, signal=27%
GO_TRANSCRIPTION_INITIATION_FROM_RNA_POLYMERASE_II_PROMOTER	GO_TRANSCRIPTION_INITIATION_FROM_RNA_POLYMERASE_II_PROMOTER		188	-0.298327	-1.09387	0.354839	0.374677	1	7681	tags=23%, list=14%, signal=26%
GO_AORTA_DEVELOPMENT	GO_AORTA_DEVELOPMENT		56	-0.351514	-1.09333	0.338205	0.375078	1	7832	tags=29%, list=14%, signal=33%
GO_LIPID_DIGESTION	GO_LIPID_DIGESTION		21	-0.395583	-1.09307	0.31185	0.375086	1	7753	tags=29%, list=14%, signal=33%
GO_KERATAN_SULFATE_BIOSYNTHETIC_PROCESS	GO_KERATAN_SULFATE_BIOSYNTHETIC_PROCESS		28	-0.346508	-1.0926	0.337374	0.375363	1	5092	tags=21%, list=9%, signal=24%
GO_FEEDING_BEHAVIOR	GO_FEEDING_BEHAVIOR		105	-0.288307	-1.09231	0.299363	0.375431	1	13055	tags=33%, list=24%, signal=44%
GO_POSITIVE_REGULATION_OF_CILIUM_ASSEMBLY	GO_POSITIVE_REGULATION_OF_CILIUM_ASSEMBLY		24	-0.38297	-1.09169	0.363636	0.375942	1	1918	tags=21%, list=3%, signal=22%
GO_SPERM_EGG_RECOGNITION	GO_SPERM_EGG_RECOGNITION		60	-0.304765	-1.09123	0.319106	0.376262	1	11347	tags=33%, list=20%, signal=42%
GO_RNA_PHOSPHODIESTER_BOND_HYDROLYSIS	GO_RNA_PHOSPHODIESTER_BOND_HYDROLYSIS		159	-0.311654	-1.09095	0.36255	0.376309	1	12372	tags=31%, list=22%, signal=40%
GO_RELAXATION_OF_MUSCLE	GO_RELAXATION_OF_MUSCLE		31	-0.359511	-1.09048	0.343558	0.376549	1	6395	tags=26%, list=12%, signal=29%
GO_REGULATION_OF_PROTEIN_AUTOPHOSPHORYLATION	GO_REGULATION_OF_PROTEIN_AUTOPHOSPHORYLATION		48	-0.348485	-1.08815	0.342975	0.379445	1	8336	tags=33%, list=15%, signal=39%
GO_LUNG_ALVEOLUS_DEVELOPMENT	GO_LUNG_ALVEOLUS_DEVELOPMENT		41	-0.364544	-1.08813	0.358051	0.379135	1	8395	tags=29%, list=15%, signal=34%
GO_AMINE_TRANSPORT	GO_AMINE_TRANSPORT		99	-0.297257	-1.08765	0.313929	0.379482	1	8698	tags=25%, list=16%, signal=30%
GO_LEUKOTRIENE_BIOSYNTHETIC_PROCESS	GO_LEUKOTRIENE_BIOSYNTHETIC_PROCESS		21	-0.392899	-1.08619	0.366667	0.381066	1	5299	tags=24%, list=10%, signal=26%
GO_BRANCHING_INVOLVED_IN_BLOOD_VESSEL_MORPHOGENESIS	GO_BRANCHING_INVOLVED_IN_BLOOD_VESSEL_MORPHOGENESIS		36	-0.36621	-1.0861	0.345114	0.38084	1	8195	tags=25%, list=15%, signal=29%
GO_FOREBRAIN_NEURON_DEVELOPMENT	GO_FOREBRAIN_NEURON_DEVELOPMENT		26	-0.35981	-1.08599	0.310062	0.380642	1	7506	tags=27%, list=14%, signal=31%
GO_PEPTIDYL_TYROSINE_DEPHOSPHORYLATION	GO_PEPTIDYL_TYROSINE_DEPHOSPHORYLATION		103	-0.305593	-1.08566	0.336117	0.380714	1	5205	tags=20%, list=9%, signal=22%
GO_NEGATIVE_REGULATION_OF_PLASMA_MEMBRANE_BOUNDED_CELL_PROJECTION_ASSEMBLY	GO_NEGATIVE_REGULATION_OF_PLASMA_MEMBRANE_BOUNDED_CELL_PROJECTION_ASSEMBLY		28	-0.332889	-1.08531	0.342553	0.380824	1	7117	tags=25%, list=13%, signal=29%
GO_RESPONSE_TO_ANTIBIOTIC	GO_RESPONSE_TO_ANTIBIOTIC		47	-0.33141	-1.08507	0.352577	0.380827	1	7433	tags=26%, list=13%, signal=29%
GO_MITOCHONDRIAL_OUTER_MEMBRANE_PERMEABILIZATION	GO_MITOCHONDRIAL_OUTER_MEMBRANE_PERMEABILIZATION		55	-0.314712	-1.08418	0.348008	0.381673	1	6837	tags=25%, list=12%, signal=29%
GO_POSITIVE_REGULATION_OF_MORPHOGENESIS_OF_AN_EPITHELIUM	GO_POSITIVE_REGULATION_OF_MORPHOGENESIS_OF_AN_EPITHELIUM		36	-0.343036	-1.08273	0.327801	0.383231	1	5291	tags=19%, list=10%, signal=21%
GO_DIGESTION	GO_DIGESTION		141	-0.28402	-1.08263	0.277657	0.383038	1	8501	tags=19%, list=15%, signal=23%
GO_POSITIVE_REGULATION_OF_MESENCHYMAL_CELL_PROLIFERATION	GO_POSITIVE_REGULATION_OF_MESENCHYMAL_CELL_PROLIFERATION		25	-0.38553	-1.08262	0.334016	0.382715	1	5112	tags=28%, list=9%, signal=31%
GO_GLYCOLYTIC_PROCESS_THROUGH_FRUCTOSE_6_PHOSPHATE	GO_GLYCOLYTIC_PROCESS_THROUGH_FRUCTOSE_6_PHOSPHATE		29	-0.369304	-1.08203	0.369919	0.383263	1	8586	tags=34%, list=15%, signal=41%
GO_NEGATIVE_REGULATION_OF_CAMP_MEDIATED_SIGNALING	GO_NEGATIVE_REGULATION_OF_CAMP_MEDIATED_SIGNALING		24	-0.351511	-1.08162	0.359918	0.383503	1	4013	tags=21%, list=7%, signal=22%
GO_ANTERIOR_POSTERIOR_AXIS_SPECIFICATION	GO_ANTERIOR_POSTERIOR_AXIS_SPECIFICATION		52	-0.322813	-1.08123	0.324731	0.383681	1	12144	tags=35%, list=22%, signal=44%
GO_NEGATIVE_REGULATION_OF_MICROTUBULE_POLYMERIZATION_OR_DEPOLYMERIZATION	GO_NEGATIVE_REGULATION_OF_MICROTUBULE_POLYMERIZATION_OR_DEPOLYMERIZATION		39	-0.352451	-1.08101	0.365344	0.383632	1	6210	tags=26%, list=11%, signal=29%
GO_REGULATION_OF_MESENCHYMAL_CELL_PROLIFERATION	GO_REGULATION_OF_MESENCHYMAL_CELL_PROLIFERATION		33	-0.36533	-1.08001	0.356415	0.384639	1	7764	tags=33%, list=14%, signal=39%
GO_NEGATIVE_REGULATION_OF_MYOBLAST_DIFFERENTIATION	GO_NEGATIVE_REGULATION_OF_MYOBLAST_DIFFERENTIATION		25	-0.339205	-1.07991	0.338583	0.384454	1	10452	tags=40%, list=19%, signal=49%
GO_CELL_FATE_COMMITMENT_INVOLVED_IN_FORMATION_OF_PRIMARY_GERM_LAYER	GO_CELL_FATE_COMMITMENT_INVOLVED_IN_FORMATION_OF_PRIMARY_GERM_LAYER		34	-0.340019	-1.07975	0.342916	0.384328	1	15946	tags=44%, list=29%, signal=62%
GO_SYNAPSE_MATURATION	GO_SYNAPSE_MATURATION		26	-0.352141	-1.07743	0.349301	0.387169	1	7622	tags=31%, list=14%, signal=36%
GO_SCHWANN_CELL_DIFFERENTIATION	GO_SCHWANN_CELL_DIFFERENTIATION		39	-0.340822	-1.07694	0.349594	0.387496	1	11504	tags=44%, list=21%, signal=55%
GO_POSITIVE_REGULATION_OF_SYNAPSE_ASSEMBLY	GO_POSITIVE_REGULATION_OF_SYNAPSE_ASSEMBLY		67	-0.313968	-1.07655	0.352941	0.387683	1	7867	tags=25%, list=14%, signal=30%
GO_FLUID_TRANSPORT	GO_FLUID_TRANSPORT		28	-0.355346	-1.07636	0.324786	0.387594	1	9104	tags=25%, list=16%, signal=30%
GO_CERAMIDE_CATABOLIC_PROCESS	GO_CERAMIDE_CATABOLIC_PROCESS		21	-0.393924	-1.07586	0.3583	0.387932	1	5781	tags=29%, list=10%, signal=32%
GO_ENDOTHELIAL_CELL_APOPTOTIC_PROCESS	GO_ENDOTHELIAL_CELL_APOPTOTIC_PROCESS		65	-0.319401	-1.0758	0.340206	0.387692	1	8562	tags=25%, list=15%, signal=29%
GO_POSITIVE_REGULATION_OF_FATTY_ACID_BIOSYNTHETIC_PROCESS	GO_POSITIVE_REGULATION_OF_FATTY_ACID_BIOSYNTHETIC_PROCESS		23	-0.370227	-1.07519	0.372917	0.388229	1	7753	tags=35%, list=14%, signal=40%
GO_CARTILAGE_DEVELOPMENT	GO_CARTILAGE_DEVELOPMENT		195	-0.30094	-1.07457	0.320408	0.388707	1	8515	tags=27%, list=15%, signal=32%
GO_REGULATION_OF_MYOBLAST_DIFFERENTIATION	GO_REGULATION_OF_MYOBLAST_DIFFERENTIATION		53	-0.335296	-1.07393	0.369295	0.389238	1	12412	tags=38%, list=22%, signal=49%
GO_ARTERY_MORPHOGENESIS	GO_ARTERY_MORPHOGENESIS		71	-0.332033	-1.07391	0.354167	0.388936	1	7832	tags=24%, list=14%, signal=28%
GO_REGULATION_OF_NEURONAL_SYNAPTIC_PLASTICITY	GO_REGULATION_OF_NEURONAL_SYNAPTIC_PLASTICITY		53	-0.317789	-1.0726	0.350701	0.390342	1	9809	tags=25%, list=18%, signal=30%
GO_GLUTAMINE_FAMILY_AMINO_ACID_CATABOLIC_PROCESS	GO_GLUTAMINE_FAMILY_AMINO_ACID_CATABOLIC_PROCESS		26	-0.355945	-1.07109	0.356994	0.392037	1	4698	tags=23%, list=8%, signal=25%
GO_RETINA_LAYER_FORMATION	GO_RETINA_LAYER_FORMATION		25	-0.364719	-1.07091	0.358811	0.391975	1	8031	tags=28%, list=14%, signal=33%
GO_AUTOPHAGOSOME_ORGANIZATION	GO_AUTOPHAGOSOME_ORGANIZATION		98	-0.326118	-1.06925	0.372709	0.39388	1	10264	tags=28%, list=19%, signal=34%
GO_POSITIVE_REGULATION_OF_PHOSPHATASE_ACTIVITY	GO_POSITIVE_REGULATION_OF_PHOSPHATASE_ACTIVITY		34	-0.367658	-1.06882	0.373717	0.394122	1	10239	tags=35%, list=18%, signal=43%
GO_OSTEOBLAST_PROLIFERATION	GO_OSTEOBLAST_PROLIFERATION		32	-0.345494	-1.06795	0.354486	0.394966	1	8824	tags=34%, list=16%, signal=41%
GO_NEGATIVE_REGULATION_OF_TUMOR_NECROSIS_FACTOR_MEDIATED_SIGNALING_PATHWAY	GO_NEGATIVE_REGULATION_OF_TUMOR_NECROSIS_FACTOR_MEDIATED_SIGNALING_PATHWAY		22	-0.348601	-1.06771	0.346821	0.394946	1	7753	tags=27%, list=14%, signal=32%
GO_POSITIVE_REGULATION_OF_G_PROTEIN_COUPLED_RECEPTOR_SIGNALING_PATHWAY	GO_POSITIVE_REGULATION_OF_G_PROTEIN_COUPLED_RECEPTOR_SIGNALING_PATHWAY		28	-0.34565	-1.06717	0.351464	0.395296	1	13735	tags=39%, list=25%, signal=52%
GO_HISTONE_EXCHANGE	GO_HISTONE_EXCHANGE		59	-0.337139	-1.06704	0.378431	0.395104	1	9263	tags=31%, list=17%, signal=37%
GO_MODIFIED_AMINO_ACID_TRANSPORT	GO_MODIFIED_AMINO_ACID_TRANSPORT		27	-0.352039	-1.06574	0.374486	0.396481	1	13039	tags=41%, list=24%, signal=53%
GO_VITAMIN_BIOSYNTHETIC_PROCESS	GO_VITAMIN_BIOSYNTHETIC_PROCESS		21	-0.376703	-1.06566	0.404082	0.396257	1	6687	tags=24%, list=12%, signal=27%
GO_POSITIVE_REGULATION_OF_MYOBLAST_DIFFERENTIATION	GO_POSITIVE_REGULATION_OF_MYOBLAST_DIFFERENTIATION		22	-0.407346	-1.06553	0.383197	0.396094	1	3061	tags=18%, list=6%, signal=19%
GO_POSITIVE_REGULATION_OF_SIGNAL_TRANSDUCTION_BY_P53_CLASS_MEDIATOR	GO_POSITIVE_REGULATION_OF_SIGNAL_TRANSDUCTION_BY_P53_CLASS_MEDIATOR		22	-0.357417	-1.06443	0.381238	0.397164	1	9856	tags=36%, list=18%, signal=44%
GO_NEGATIVE_REGULATION_OF_CYCLIN_DEPENDENT_PROTEIN_KINASE_ACTIVITY	GO_NEGATIVE_REGULATION_OF_CYCLIN_DEPENDENT_PROTEIN_KINASE_ACTIVITY		32	-0.335981	-1.06439	0.371849	0.396882	1	11308	tags=41%, list=20%, signal=51%
GO_MOLTING_CYCLE	GO_MOLTING_CYCLE		110	-0.309977	-1.06412	0.37155	0.396945	1	8218	tags=26%, list=15%, signal=31%
GO_RETINOIC_ACID_METABOLIC_PROCESS	GO_RETINOIC_ACID_METABOLIC_PROCESS		33	-0.338587	-1.06312	0.346856	0.397936	1	2155	tags=12%, list=4%, signal=13%
GO_BONE_MORPHOGENESIS	GO_BONE_MORPHOGENESIS		94	-0.316057	-1.06308	0.345833	0.397653	1	6893	tags=23%, list=12%, signal=27%
GO_DIGESTIVE_SYSTEM_PROCESS	GO_DIGESTIVE_SYSTEM_PROCESS		102	-0.284952	-1.06258	0.320346	0.397998	1	5080	tags=15%, list=9%, signal=16%
GO_NERVE_DEVELOPMENT	GO_NERVE_DEVELOPMENT		79	-0.298433	-1.06243	0.367304	0.397866	1	6223	tags=22%, list=11%, signal=24%
GO_POSITIVE_REGULATION_OF_PHOSPHOLIPID_METABOLIC_PROCESS	GO_POSITIVE_REGULATION_OF_PHOSPHOLIPID_METABOLIC_PROCESS		50	-0.324324	-1.06216	0.356	0.397887	1	5860	tags=20%, list=11%, signal=22%
GO_MIRNA_MEDIATED_INHIBITION_OF_TRANSLATION	GO_MIRNA_MEDIATED_INHIBITION_OF_TRANSLATION		78	-0.31245	-1.06174	0.381048	0.398137	1	13071	tags=21%, list=24%, signal=27%
GO_PROTEIN_AUTOUBIQUITINATION	GO_PROTEIN_AUTOUBIQUITINATION		74	-0.327817	-1.06163	0.402041	0.397946	1	11095	tags=34%, list=20%, signal=42%
GO_LAMELLIPODIUM_ASSEMBLY	GO_LAMELLIPODIUM_ASSEMBLY		67	-0.323511	-1.06154	0.397028	0.397725	1	4716	tags=18%, list=9%, signal=20%
GO_CELLULAR_PIGMENTATION	GO_CELLULAR_PIGMENTATION		52	-0.324048	-1.06141	0.375258	0.397574	1	4583	tags=19%, list=8%, signal=21%
GO_REGULATION_OF_MICROTUBULE_POLYMERIZATION	GO_REGULATION_OF_MICROTUBULE_POLYMERIZATION		51	-0.3265	-1.06119	0.373967	0.397532	1	6210	tags=22%, list=11%, signal=24%
GO_POSITIVE_REGULATION_OF_P38MAPK_CASCADE	GO_POSITIVE_REGULATION_OF_P38MAPK_CASCADE		31	-0.330225	-1.0601	0.358974	0.398663	1	7689	tags=26%, list=14%, signal=30%
GO_XENOBIOTIC_TRANSPORT	GO_XENOBIOTIC_TRANSPORT		34	-0.341165	-1.05948	0.354167	0.399136	1	5694	tags=24%, list=10%, signal=26%
GO_POSITIVE_REGULATION_OF_ERYTHROCYTE_DIFFERENTIATION	GO_POSITIVE_REGULATION_OF_ERYTHROCYTE_DIFFERENTIATION		34	-0.355802	-1.05947	0.367521	0.398807	1	2319	tags=15%, list=4%, signal=15%
GO_REGULATION_OF_BMP_SIGNALING_PATHWAY	GO_REGULATION_OF_BMP_SIGNALING_PATHWAY		92	-0.30087	-1.05868	0.353945	0.39954	1	9255	tags=26%, list=17%, signal=31%
GO_LONG_TERM_MEMORY	GO_LONG_TERM_MEMORY		34	-0.352595	-1.05738	0.377953	0.400875	1	7026	tags=26%, list=13%, signal=30%
GO_CELL_VOLUME_HOMEOSTASIS	GO_CELL_VOLUME_HOMEOSTASIS		30	-0.331579	-1.05734	0.357576	0.400596	1	8486	tags=27%, list=15%, signal=31%
GO_HISTONE_METHYLATION	GO_HISTONE_METHYLATION		143	-0.329409	-1.05683	0.40239	0.400961	1	14055	tags=36%, list=25%, signal=48%
GO_CELLULAR_COMPONENT_ASSEMBLY_INVOLVED_IN_MORPHOGENESIS	GO_CELLULAR_COMPONENT_ASSEMBLY_INVOLVED_IN_MORPHOGENESIS		111	-0.359474	-1.05675	0.430612	0.400718	1	9994	tags=32%, list=18%, signal=38%
GO_CELLULAR_RESPONSE_TO_LIGHT_STIMULUS	GO_CELLULAR_RESPONSE_TO_LIGHT_STIMULUS		128	-0.276714	-1.05651	0.365145	0.400722	1	10899	tags=26%, list=20%, signal=32%
GO_POSITIVE_REGULATION_OF_RESPONSE_TO_DNA_DAMAGE_STIMULUS	GO_POSITIVE_REGULATION_OF_RESPONSE_TO_DNA_DAMAGE_STIMULUS		105	-0.304134	-1.05641	0.386503	0.400525	1	10183	tags=28%, list=18%, signal=34%
GO_UBIQUITIN_DEPENDENT_PROTEIN_CATABOLIC_PROCESS_VIA_THE_MULTIVESICULAR_BODY_SORTING_PATHWAY	GO_UBIQUITIN_DEPENDENT_PROTEIN_CATABOLIC_PROCESS_VIA_THE_MULTIVESICULAR_BODY_SORTING_PATHWAY		23	-0.364579	-1.05608	0.413306	0.40068	1	11955	tags=43%, list=22%, signal=55%
GO_MATING	GO_MATING		41	-0.314955	-1.05506	0.370213	0.401697	1	5450	tags=20%, list=10%, signal=22%
GO_CELL_COMMUNICATION_BY_ELECTRICAL_COUPLING_INVOLVED_IN_CARDIAC_CONDUCTION	GO_CELL_COMMUNICATION_BY_ELECTRICAL_COUPLING_INVOLVED_IN_CARDIAC_CONDUCTION		24	-0.370585	-1.05386	0.390041	0.403025	1	15354	tags=50%, list=28%, signal=69%
GO_REGULATION_OF_FATTY_ACID_TRANSPORT	GO_REGULATION_OF_FATTY_ACID_TRANSPORT		28	-0.327159	-1.05369	0.364706	0.402909	1	3343	tags=14%, list=6%, signal=15%
GO_CELL_PROLIFERATION_INVOLVED_IN_KIDNEY_DEVELOPMENT	GO_CELL_PROLIFERATION_INVOLVED_IN_KIDNEY_DEVELOPMENT		21	-0.373915	-1.05307	0.377551	0.40345	1	4198	tags=24%, list=8%, signal=26%
GO_PROTEIN_ADP_RIBOSYLATION	GO_PROTEIN_ADP_RIBOSYLATION		35	-0.340346	-1.05289	0.406571	0.403363	1	8655	tags=31%, list=16%, signal=37%
GO_ODONTOGENESIS_OF_DENTIN_CONTAINING_TOOTH	GO_ODONTOGENESIS_OF_DENTIN_CONTAINING_TOOTH		91	-0.307092	-1.05288	0.378436	0.403053	1	8395	tags=26%, list=15%, signal=31%
GO_REGULATION_OF_GLUCOSE_TRANSMEMBRANE_TRANSPORT	GO_REGULATION_OF_GLUCOSE_TRANSMEMBRANE_TRANSPORT		77	-0.295048	-1.05115	0.368852	0.405003	1	13300	tags=30%, list=24%, signal=39%
GO_HEMATOPOIETIC_PROGENITOR_CELL_DIFFERENTIATION	GO_HEMATOPOIETIC_PROGENITOR_CELL_DIFFERENTIATION		172	-0.286457	-1.04989	0.385417	0.406376	1	8417	tags=22%, list=15%, signal=26%
GO_REGULATION_OF_ENDOCRINE_PROCESS	GO_REGULATION_OF_ENDOCRINE_PROCESS		44	-0.307789	-1.04973	0.353877	0.406269	1	10464	tags=27%, list=19%, signal=34%
GO_REGULATION_OF_NEUROTRANSMITTER_RECEPTOR_ACTIVITY	GO_REGULATION_OF_NEUROTRANSMITTER_RECEPTOR_ACTIVITY		78	-0.292914	-1.04848	0.388412	0.407649	1	12446	tags=31%, list=22%, signal=40%
GO_CELL_SURFACE_RECEPTOR_SIGNALING_PATHWAY_INVOLVED_IN_HEART_DEVELOPMENT	GO_CELL_SURFACE_RECEPTOR_SIGNALING_PATHWAY_INVOLVED_IN_HEART_DEVELOPMENT		31	-0.35441	-1.04748	0.379877	0.408672	1	9559	tags=42%, list=17%, signal=51%
GO_HISTONE_H3_K4_METHYLATION	GO_HISTONE_H3_K4_METHYLATION		57	-0.350429	-1.04669	0.423228	0.409413	1	14046	tags=42%, list=25%, signal=56%
GO_TRANSFERRIN_TRANSPORT	GO_TRANSFERRIN_TRANSPORT		36	-0.334796	-1.04628	0.374046	0.409683	1	7383	tags=25%, list=13%, signal=29%
GO_HISTONE_DEUBIQUITINATION	GO_HISTONE_DEUBIQUITINATION		23	-0.407915	-1.04532	0.442191	0.410629	1	5343	tags=22%, list=10%, signal=24%
GO_REGULATION_OF_PEPTIDYL_SERINE_PHOSPHORYLATION	GO_REGULATION_OF_PEPTIDYL_SERINE_PHOSPHORYLATION		145	-0.269503	-1.04513	0.377049	0.410554	1	9786	tags=24%, list=18%, signal=29%
GO_DORSAL_SPINAL_CORD_DEVELOPMENT	GO_DORSAL_SPINAL_CORD_DEVELOPMENT		22	-0.375485	-1.04507	0.389831	0.4103	1	10809	tags=32%, list=19%, signal=40%
GO_VITAMIN_TRANSPORT	GO_VITAMIN_TRANSPORT		41	-0.315898	-1.04502	0.370672	0.410051	1	10058	tags=29%, list=18%, signal=36%
GO_RESPONSE_TO_PROSTAGLANDIN_E	GO_RESPONSE_TO_PROSTAGLANDIN_E		24	-0.368865	-1.04499	0.402222	0.409753	1	11022	tags=42%, list=20%, signal=52%
GO_CEREBELLAR_PURKINJE_CELL_LAYER_DEVELOPMENT	GO_CEREBELLAR_PURKINJE_CELL_LAYER_DEVELOPMENT		28	-0.352958	-1.04446	0.393574	0.410142	1	12788	tags=50%, list=23%, signal=65%
GO_POSITIVE_REGULATION_OF_LIPID_STORAGE	GO_POSITIVE_REGULATION_OF_LIPID_STORAGE		25	-0.333824	-1.04321	0.37551	0.411508	1	1156	tags=12%, list=2%, signal=12%
GO_RENAL_SYSTEM_PROCESS_INVOLVED_IN_REGULATION_OF_SYSTEMIC_ARTERIAL_BLOOD_PRESSURE	GO_RENAL_SYSTEM_PROCESS_INVOLVED_IN_REGULATION_OF_SYSTEMIC_ARTERIAL_BLOOD_PRESSURE		25	-0.34743	-1.04278	0.402806	0.411762	1	4121	tags=20%, list=7%, signal=22%
GO_RESPONSE_TO_GONADOTROPIN	GO_RESPONSE_TO_GONADOTROPIN		27	-0.350255	-1.04241	0.381526	0.411887	1	7274	tags=30%, list=13%, signal=34%
GO_REGULATION_OF_TORC1_SIGNALING	GO_REGULATION_OF_TORC1_SIGNALING		38	-0.329174	-1.04174	0.418033	0.412506	1	10490	tags=32%, list=19%, signal=39%
GO_ASSOCIATIVE_LEARNING	GO_ASSOCIATIVE_LEARNING		76	-0.290021	-1.04	0.372671	0.414431	1	10057	tags=25%, list=18%, signal=30%
GO_POSITIVE_REGULATION_OF_MUSCLE_TISSUE_DEVELOPMENT	GO_POSITIVE_REGULATION_OF_MUSCLE_TISSUE_DEVELOPMENT		82	-0.293509	-1.03952	0.394191	0.414773	1	9696	tags=24%, list=17%, signal=30%
GO_VACUOLE_ORGANIZATION	GO_VACUOLE_ORGANIZATION		173	-0.297017	-1.03919	0.397516	0.414855	1	10264	tags=28%, list=19%, signal=34%
GO_POSITIVE_REGULATION_OF_PROTEIN_DEPOLYMERIZATION	GO_POSITIVE_REGULATION_OF_PROTEIN_DEPOLYMERIZATION		20	-0.388465	-1.03887	0.398	0.414968	1	2580	tags=15%, list=5%, signal=16%
GO_REGULATION_OF_CARDIOCYTE_DIFFERENTIATION	GO_REGULATION_OF_CARDIOCYTE_DIFFERENTIATION		60	-0.293503	-1.03878	0.384778	0.414749	1	10464	tags=27%, list=19%, signal=33%
GO_REGULATION_OF_RECEPTOR_INTERNALIZATION	GO_REGULATION_OF_RECEPTOR_INTERNALIZATION		57	-0.280624	-1.03708	0.360558	0.416735	1	10524	tags=25%, list=19%, signal=30%
GO_SNARE_COMPLEX_ASSEMBLY	GO_SNARE_COMPLEX_ASSEMBLY		20	-0.350107	-1.03693	0.406746	0.416628	1	11515	tags=40%, list=21%, signal=50%
GO_RRNA_MODIFICATION	GO_RRNA_MODIFICATION		40	-0.368814	-1.03678	0.425243	0.41652	1	14102	tags=35%, list=25%, signal=47%
GO_NEGATIVE_REGULATION_OF_OSTEOCLAST_DIFFERENTIATION	GO_NEGATIVE_REGULATION_OF_OSTEOCLAST_DIFFERENTIATION		29	-0.33787	-1.036	0.417749	0.41725	1	11900	tags=41%, list=21%, signal=53%
GO_REGULATION_OF_DOUBLE_STRAND_BREAK_REPAIR_VIA_NONHOMOLOGOUS_END_JOINING	GO_REGULATION_OF_DOUBLE_STRAND_BREAK_REPAIR_VIA_NONHOMOLOGOUS_END_JOINING		29	-0.350612	-1.03512	0.41129	0.418125	1	10842	tags=41%, list=20%, signal=51%
GO_CHROMOSOME_CONDENSATION	GO_CHROMOSOME_CONDENSATION		47	-0.330689	-1.0351	0.404339	0.417811	1	7140	tags=23%, list=13%, signal=27%
GO_REGULATION_OF_GLIAL_CELL_PROLIFERATION	GO_REGULATION_OF_GLIAL_CELL_PROLIFERATION		34	-0.324481	-1.03458	0.387295	0.4182	1	4641	tags=18%, list=8%, signal=19%
GO_DE_NOVO_PROTEIN_FOLDING	GO_DE_NOVO_PROTEIN_FOLDING		41	-0.344336	-1.03446	0.419287	0.418034	1	10542	tags=27%, list=19%, signal=33%
GO_REGULATION_OF_THE_FORCE_OF_HEART_CONTRACTION	GO_REGULATION_OF_THE_FORCE_OF_HEART_CONTRACTION		27	-0.374865	-1.03393	0.392354	0.418448	1	10203	tags=37%, list=18%, signal=45%
GO_P_BODY_ASSEMBLY	GO_P_BODY_ASSEMBLY		21	-0.397203	-1.03328	0.429719	0.418997	1	10436	tags=33%, list=19%, signal=41%
GO_ENDOCARDIAL_CUSHION_FORMATION	GO_ENDOCARDIAL_CUSHION_FORMATION		24	-0.363287	-1.03314	0.435417	0.418878	1	7832	tags=38%, list=14%, signal=44%
GO_INSULIN_LIKE_GROWTH_FACTOR_RECEPTOR_SIGNALING_PATHWAY	GO_INSULIN_LIKE_GROWTH_FACTOR_RECEPTOR_SIGNALING_PATHWAY		36	-0.308878	-1.03233	0.38809	0.419653	1	9349	tags=25%, list=17%, signal=30%
GO_REGULATION_OF_NUCLEOTIDE_BIOSYNTHETIC_PROCESS	GO_REGULATION_OF_NUCLEOTIDE_BIOSYNTHETIC_PROCESS		42	-0.294146	-1.0321	0.401691	0.419636	1	9474	tags=29%, list=17%, signal=34%
GO_N_TERMINAL_PROTEIN_AMINO_ACID_MODIFICATION	GO_N_TERMINAL_PROTEIN_AMINO_ACID_MODIFICATION		29	-0.346752	-1.03173	0.430928	0.419791	1	5215	tags=21%, list=9%, signal=23%
GO_CALCIUM_ION_TRANSMEMBRANE_IMPORT_INTO_CYTOSOL	GO_CALCIUM_ION_TRANSMEMBRANE_IMPORT_INTO_CYTOSOL		137	-0.287463	-1.03036	0.405462	0.421353	1	10836	tags=28%, list=20%, signal=35%
GO_SEGMENTATION	GO_SEGMENTATION		100	-0.292661	-1.02894	0.366316	0.423015	1	8417	tags=23%, list=15%, signal=27%
GO_REGULATION_OF_LYASE_ACTIVITY	GO_REGULATION_OF_LYASE_ACTIVITY		51	-0.292545	-1.02887	0.412632	0.422769	1	5816	tags=18%, list=10%, signal=20%
GO_TYPE_B_PANCREATIC_CELL_DEVELOPMENT	GO_TYPE_B_PANCREATIC_CELL_DEVELOPMENT		20	-0.354021	-1.02861	0.402985	0.4228	1	7395	tags=35%, list=13%, signal=40%
GO_STRIATED_MUSCLE_CELL_APOPTOTIC_PROCESS	GO_STRIATED_MUSCLE_CELL_APOPTOTIC_PROCESS		49	-0.287884	-1.02839	0.376494	0.422744	1	3901	tags=14%, list=7%, signal=15%
GO_MEIOTIC_CHROMOSOME_SEGREGATION	GO_MEIOTIC_CHROMOSOME_SEGREGATION		93	-0.29714	-1.02825	0.431727	0.422624	1	6549	tags=20%, list=12%, signal=23%
GO_REGULATION_OF_INTRACELLULAR_ESTROGEN_RECEPTOR_SIGNALING_PATHWAY	GO_REGULATION_OF_INTRACELLULAR_ESTROGEN_RECEPTOR_SIGNALING_PATHWAY		39	-0.340716	-1.02825	0.435685	0.422294	1	8996	tags=36%, list=16%, signal=43%
GO_NEGATIVE_REGULATION_OF_SYNAPTIC_TRANSMISSION	GO_NEGATIVE_REGULATION_OF_SYNAPTIC_TRANSMISSION		75	-0.295969	-1.02812	0.414317	0.422122	1	10057	tags=28%, list=18%, signal=34%
GO_REGULATION_OF_NUCLEAR_TRANSCRIBED_MRNA_CATABOLIC_PROCESS_DEADENYLATION_DEPENDENT_DECAY	GO_REGULATION_OF_NUCLEAR_TRANSCRIBED_MRNA_CATABOLIC_PROCESS_DEADENYLATION_DEPENDENT_DECAY		20	-0.38907	-1.02755	0.449187	0.422619	1	6871	tags=30%, list=12%, signal=34%
GO_PERIPHERAL_NERVOUS_SYSTEM_DEVELOPMENT	GO_PERIPHERAL_NERVOUS_SYSTEM_DEVELOPMENT		77	-0.286227	-1.02755	0.387967	0.422287	1	9658	tags=29%, list=17%, signal=35%
GO_NEGATIVE_REGULATION_OF_CARDIOCYTE_DIFFERENTIATION	GO_NEGATIVE_REGULATION_OF_CARDIOCYTE_DIFFERENTIATION		27	-0.337153	-1.02745	0.421907	0.422099	1	10464	tags=37%, list=19%, signal=46%
GO_WNT_SIGNALING_PATHWAY_CALCIUM_MODULATING_PATHWAY	GO_WNT_SIGNALING_PATHWAY_CALCIUM_MODULATING_PATHWAY		38	-0.354751	-1.02739	0.424947	0.421847	1	8959	tags=34%, list=16%, signal=41%
GO_REGULATION_OF_MONOOXYGENASE_ACTIVITY	GO_REGULATION_OF_MONOOXYGENASE_ACTIVITY		65	-0.285605	-1.02716	0.401606	0.421846	1	6210	tags=18%, list=11%, signal=21%
GO_RRNA_CATABOLIC_PROCESS	GO_RRNA_CATABOLIC_PROCESS		21	-0.361204	-1.02662	0.418511	0.422275	1	16702	tags=38%, list=30%, signal=54%
GO_SENSORY_PERCEPTION_OF_TASTE	GO_SENSORY_PERCEPTION_OF_TASTE		64	-0.293616	-1.02633	0.402464	0.422318	1	11370	tags=25%, list=20%, signal=31%
GO_POSITIVE_REGULATION_OF_BLOOD_VESSEL_ENDOTHELIAL_CELL_MIGRATION	GO_POSITIVE_REGULATION_OF_BLOOD_VESSEL_ENDOTHELIAL_CELL_MIGRATION		74	-0.301328	-1.02526	0.45283	0.42353	1	9640	tags=28%, list=17%, signal=34%
GO_ATRIOVENTRICULAR_VALVE_DEVELOPMENT	GO_ATRIOVENTRICULAR_VALVE_DEVELOPMENT		26	-0.359913	-1.02504	0.446721	0.423494	1	7239	tags=35%, list=13%, signal=40%
GO_AMINOGLYCAN_BIOSYNTHETIC_PROCESS	GO_AMINOGLYCAN_BIOSYNTHETIC_PROCESS		115	-0.292407	-1.02392	0.407708	0.424697	1	8502	tags=25%, list=15%, signal=30%
GO_SOMITE_DEVELOPMENT	GO_SOMITE_DEVELOPMENT		89	-0.309937	-1.02329	0.412664	0.425231	1	12376	tags=31%, list=22%, signal=40%
GO_POSITIVE_REGULATION_OF_ALCOHOL_BIOSYNTHETIC_PROCESS	GO_POSITIVE_REGULATION_OF_ALCOHOL_BIOSYNTHETIC_PROCESS		28	-0.335326	-1.02311	0.415094	0.425139	1	11022	tags=29%, list=20%, signal=36%
GO_CARTILAGE_DEVELOPMENT_INVOLVED_IN_ENDOCHONDRAL_BONE_MORPHOGENESIS	GO_CARTILAGE_DEVELOPMENT_INVOLVED_IN_ENDOCHONDRAL_BONE_MORPHOGENESIS		29	-0.361439	-1.02192	0.434043	0.426489	1	8486	tags=31%, list=15%, signal=37%
GO_REGULATION_OF_MORPHOGENESIS_OF_A_BRANCHING_STRUCTURE	GO_REGULATION_OF_MORPHOGENESIS_OF_A_BRANCHING_STRUCTURE		56	-0.306659	-1.02191	0.416318	0.426178	1	8417	tags=23%, list=15%, signal=27%
GO_NEGATIVE_REGULATION_OF_PROTEIN_DEPHOSPHORYLATION	GO_NEGATIVE_REGULATION_OF_PROTEIN_DEPHOSPHORYLATION		64	-0.291337	-1.02176	0.421162	0.426029	1	6616	tags=20%, list=12%, signal=23%
GO_BODY_MORPHOGENESIS	GO_BODY_MORPHOGENESIS		49	-0.33265	-1.02067	0.422594	0.427307	1	8307	tags=27%, list=15%, signal=31%
GO_PURINE_NUCLEOBASE_METABOLIC_PROCESS	GO_PURINE_NUCLEOBASE_METABOLIC_PROCESS		20	-0.382922	-1.02031	0.43215	0.42743	1	7618	tags=20%, list=14%, signal=23%
GO_CENTROMERE_COMPLEX_ASSEMBLY	GO_CENTROMERE_COMPLEX_ASSEMBLY		56	-0.348947	-1.02026	0.455102	0.427178	1	9263	tags=30%, list=17%, signal=36%
GO_PTERIDINE_CONTAINING_COMPOUND_METABOLIC_PROCESS	GO_PTERIDINE_CONTAINING_COMPOUND_METABOLIC_PROCESS		34	-0.320053	-1.01946	0.419802	0.427984	1	10563	tags=35%, list=19%, signal=44%
GO_REGULATION_OF_CELLULAR_RESPONSE_TO_INSULIN_STIMULUS	GO_REGULATION_OF_CELLULAR_RESPONSE_TO_INSULIN_STIMULUS		75	-0.285442	-1.01938	0.417004	0.427772	1	12075	tags=32%, list=22%, signal=41%
GO_T_CELL_DIFFERENTIATION_IN_THYMUS	GO_T_CELL_DIFFERENTIATION_IN_THYMUS		76	-0.328605	-1.01861	0.430612	0.428491	1	7154	tags=22%, list=13%, signal=26%
GO_NUCLEAR_TRANSCRIBED_MRNA_POLY_A_TAIL_SHORTENING	GO_NUCLEAR_TRANSCRIBED_MRNA_POLY_A_TAIL_SHORTENING		35	-0.37422	-1.01803	0.454175	0.428934	1	12876	tags=40%, list=23%, signal=52%
GO_GRANULOCYTE_DIFFERENTIATION	GO_GRANULOCYTE_DIFFERENTIATION		34	-0.325151	-1.01773	0.415289	0.428986	1	9409	tags=29%, list=17%, signal=35%
GO_CELL_PROLIFERATION_IN_FOREBRAIN	GO_CELL_PROLIFERATION_IN_FOREBRAIN		28	-0.348262	-1.01724	0.422747	0.429317	1	7764	tags=32%, list=14%, signal=37%
GO_POSITIVE_REGULATION_OF_DNA_REPAIR	GO_POSITIVE_REGULATION_OF_DNA_REPAIR		71	-0.305407	-1.0167	0.446281	0.429754	1	10842	tags=28%, list=20%, signal=35%
GO_CELLULAR_RESPONSE_TO_CORTICOSTEROID_STIMULUS	GO_CELLULAR_RESPONSE_TO_CORTICOSTEROID_STIMULUS		62	-0.285197	-1.01667	0.423154	0.429463	1	10452	tags=29%, list=19%, signal=36%
GO_POSITIVE_REGULATION_OF_SYNAPTIC_TRANSMISSION_GLUTAMATERGIC	GO_POSITIVE_REGULATION_OF_SYNAPTIC_TRANSMISSION_GLUTAMATERGIC		32	-0.336056	-1.01434	0.424116	0.432363	1	11746	tags=34%, list=21%, signal=44%
GO_SYNAPTONEMAL_COMPLEX_ORGANIZATION	GO_SYNAPTONEMAL_COMPLEX_ORGANIZATION		24	-0.325085	-1.0143	0.419679	0.43211	1	6549	tags=21%, list=12%, signal=24%
GO_VASCULAR_ASSOCIATED_SMOOTH_MUSCLE_CELL_MIGRATION	GO_VASCULAR_ASSOCIATED_SMOOTH_MUSCLE_CELL_MIGRATION		36	-0.324494	-1.01251	0.427992	0.434196	1	2552	tags=11%, list=5%, signal=12%
GO_REGULATION_OF_ANDROGEN_RECEPTOR_SIGNALING_PATHWAY	GO_REGULATION_OF_ANDROGEN_RECEPTOR_SIGNALING_PATHWAY		26	-0.331446	-1.01137	0.433265	0.435449	1	13850	tags=38%, list=25%, signal=51%
GO_ARP2_3_COMPLEX_MEDIATED_ACTIN_NUCLEATION	GO_ARP2_3_COMPLEX_MEDIATED_ACTIN_NUCLEATION		40	-0.315903	-1.01121	0.442231	0.435306	1	3821	tags=13%, list=7%, signal=13%
GO_NEGATIVE_REGULATION_OF_GENE_EXPRESSION_EPIGENETIC	GO_NEGATIVE_REGULATION_OF_GENE_EXPRESSION_EPIGENETIC		124	-0.299539	-1.00924	0.446028	0.437672	1	13740	tags=35%, list=25%, signal=47%
GO_POSITIVE_REGULATION_OF_AMINO_ACID_TRANSPORT	GO_POSITIVE_REGULATION_OF_AMINO_ACID_TRANSPORT		21	-0.349365	-1.00902	0.443992	0.43766	1	14308	tags=38%, list=26%, signal=51%
GO_NUCLEOBASE_CONTAINING_SMALL_MOLECULE_INTERCONVERSION	GO_NUCLEOBASE_CONTAINING_SMALL_MOLECULE_INTERCONVERSION		27	-0.334917	-1.00843	0.45	0.438176	1	9898	tags=33%, list=18%, signal=41%
GO_POSITIVE_REGULATION_OF_ENDOTHELIAL_CELL_APOPTOTIC_PROCESS	GO_POSITIVE_REGULATION_OF_ENDOTHELIAL_CELL_APOPTOTIC_PROCESS		24	-0.33992	-1.00822	0.431493	0.438108	1	9640	tags=25%, list=17%, signal=30%
GO_REGULATION_OF_ORGANIC_ACID_TRANSPORT	GO_REGULATION_OF_ORGANIC_ACID_TRANSPORT		67	-0.283414	-1.00787	0.432773	0.438262	1	9809	tags=24%, list=18%, signal=29%
GO_REGULATION_OF_CARDIAC_MUSCLE_TISSUE_DEVELOPMENT	GO_REGULATION_OF_CARDIAC_MUSCLE_TISSUE_DEVELOPMENT		98	-0.279582	-1.00737	0.423237	0.438609	1	14416	tags=36%, list=26%, signal=48%
GO_PROTEIN_HYDROXYLATION	GO_PROTEIN_HYDROXYLATION		27	-0.330442	-1.0071	0.420152	0.438689	1	14009	tags=44%, list=25%, signal=59%
GO_CYTOPLASMIC_MICROTUBULE_ORGANIZATION	GO_CYTOPLASMIC_MICROTUBULE_ORGANIZATION		63	-0.314654	-1.00627	0.434959	0.439483	1	8486	tags=27%, list=15%, signal=32%
GO_NEUROTROPHIN_SIGNALING_PATHWAY	GO_NEUROTROPHIN_SIGNALING_PATHWAY		39	-0.338267	-1.00603	0.46281	0.439453	1	16497	tags=46%, list=30%, signal=66%
GO_CENTRAL_NERVOUS_SYSTEM_NEURON_DEVELOPMENT	GO_CENTRAL_NERVOUS_SYSTEM_NEURON_DEVELOPMENT		82	-0.287124	-1.00574	0.467909	0.439508	1	8982	tags=28%, list=16%, signal=33%
GO_REGULATION_OF_MACROPHAGE_DERIVED_FOAM_CELL_DIFFERENTIATION	GO_REGULATION_OF_MACROPHAGE_DERIVED_FOAM_CELL_DIFFERENTIATION		32	-0.313474	-1.00507	0.455796	0.440133	1	4176	tags=19%, list=8%, signal=20%
GO_BRANCHING_MORPHOGENESIS_OF_AN_EPITHELIAL_TUBE	GO_BRANCHING_MORPHOGENESIS_OF_AN_EPITHELIAL_TUBE		155	-0.28618	-1.00439	0.425051	0.440735	1	9036	tags=25%, list=16%, signal=29%
GO_HISTONE_H4_K16_ACETYLATION	GO_HISTONE_H4_K16_ACETYLATION		21	-0.395547	-1.00423	0.466135	0.440592	1	12520	tags=38%, list=23%, signal=49%
GO_PROTEIN_DEMANNOSYLATION	GO_PROTEIN_DEMANNOSYLATION		20	-0.393237	-1.00384	0.475345	0.440789	1	9266	tags=35%, list=17%, signal=42%
GO_REGULATION_OF_POSTTRANSCRIPTIONAL_GENE_SILENCING	GO_REGULATION_OF_POSTTRANSCRIPTIONAL_GENE_SILENCING		116	-0.3028	-1.00297	0.466667	0.441655	1	12987	tags=35%, list=23%, signal=46%
GO_NEGATIVE_REGULATION_OF_NUCLEAR_DIVISION	GO_NEGATIVE_REGULATION_OF_NUCLEAR_DIVISION		60	-0.302267	-1.00243	0.428008	0.44208	1	7705	tags=23%, list=14%, signal=27%
GO_RESPONSE_TO_NERVE_GROWTH_FACTOR	GO_RESPONSE_TO_NERVE_GROWTH_FACTOR		52	-0.317235	-1.00209	0.454175	0.442208	1	16614	tags=50%, list=30%, signal=71%
GO_NUCLEOTIDE_EXCISION_REPAIR_DNA_DUPLEX_UNWINDING	GO_NUCLEOTIDE_EXCISION_REPAIR_DNA_DUPLEX_UNWINDING		22	-0.34603	-1.00128	0.471888	0.442991	1	4434	tags=23%, list=8%, signal=25%
GO_POSITIVE_REGULATION_OF_CREB_TRANSCRIPTION_FACTOR_ACTIVITY	GO_POSITIVE_REGULATION_OF_CREB_TRANSCRIPTION_FACTOR_ACTIVITY		20	-0.357763	-1.0012	0.441718	0.442758	1	10084	tags=50%, list=18%, signal=61%
GO_TRANSCRIPTION_ELONGATION_FROM_RNA_POLYMERASE_II_PROMOTER	GO_TRANSCRIPTION_ELONGATION_FROM_RNA_POLYMERASE_II_PROMOTER		84	-0.3171	-1.00098	0.484064	0.44273	1	13047	tags=30%, list=24%, signal=39%
GO_REGULATION_OF_RESPONSE_TO_REACTIVE_OXYGEN_SPECIES	GO_REGULATION_OF_RESPONSE_TO_REACTIVE_OXYGEN_SPECIES		35	-0.311087	-1.00066	0.425	0.442873	1	10669	tags=31%, list=19%, signal=39%
GO_POSITIVE_REGULATION_OF_POTASSIUM_ION_TRANSMEMBRANE_TRANSPORTER_ACTIVITY	GO_POSITIVE_REGULATION_OF_POTASSIUM_ION_TRANSMEMBRANE_TRANSPORTER_ACTIVITY		25	-0.331185	-1.00051	0.450304	0.442742	1	4894	tags=20%, list=9%, signal=22%
GO_MYOTUBE_CELL_DEVELOPMENT	GO_MYOTUBE_CELL_DEVELOPMENT		35	-0.365477	-0.999801	0.467197	0.443403	1	6607	tags=23%, list=12%, signal=26%
GO_VIRAL_BUDDING	GO_VIRAL_BUDDING		26	-0.362967	-0.99966	0.458733	0.443267	1	9107	tags=27%, list=16%, signal=32%
GO_NEUROTRANSMITTER_RECEPTOR_LOCALIZATION_TO_POSTSYNAPTIC_SPECIALIZATION_MEMBRANE	GO_NEUROTRANSMITTER_RECEPTOR_LOCALIZATION_TO_POSTSYNAPTIC_SPECIALIZATION_MEMBRANE		22	-0.339308	-0.998941	0.468813	0.443938	1	11218	tags=27%, list=20%, signal=34%
GO_REGULATION_OF_CHOLESTEROL_EFFLUX	GO_REGULATION_OF_CHOLESTEROL_EFFLUX		42	-0.291963	-0.998645	0.452525	0.444001	1	13341	tags=33%, list=24%, signal=44%
GO_GLYCOSYL_COMPOUND_CATABOLIC_PROCESS	GO_GLYCOSYL_COMPOUND_CATABOLIC_PROCESS		42	-0.31742	-0.99818	0.437255	0.444287	1	10199	tags=31%, list=18%, signal=38%
GO_CRANIAL_NERVE_DEVELOPMENT	GO_CRANIAL_NERVE_DEVELOPMENT		51	-0.286427	-0.998042	0.455466	0.444129	1	6223	tags=22%, list=11%, signal=24%
GO_POSITIVE_REGULATION_OF_ORGANIC_ACID_TRANSPORT	GO_POSITIVE_REGULATION_OF_ORGANIC_ACID_TRANSPORT		40	-0.300707	-0.997738	0.458159	0.444203	1	7527	tags=18%, list=14%, signal=20%
GO_POSITIVE_REGULATION_OF_LIPID_LOCALIZATION	GO_POSITIVE_REGULATION_OF_LIPID_LOCALIZATION		93	-0.27196	-0.997569	0.459916	0.444114	1	8716	tags=18%, list=16%, signal=22%
GO_BASE_CONVERSION_OR_SUBSTITUTION_EDITING	GO_BASE_CONVERSION_OR_SUBSTITUTION_EDITING		21	-0.35232	-0.997151	0.4625	0.444337	1	2680	tags=14%, list=5%, signal=15%
GO_EXIT_FROM_MITOSIS	GO_EXIT_FROM_MITOSIS		28	-0.329712	-0.996899	0.45809	0.44436	1	9112	tags=29%, list=16%, signal=34%
GO_CRANIAL_NERVE_MORPHOGENESIS	GO_CRANIAL_NERVE_MORPHOGENESIS		29	-0.330398	-0.996877	0.444676	0.44405	1	11126	tags=31%, list=20%, signal=39%
GO_POSITIVE_REGULATION_OF_TRANSCRIPTION_REGULATORY_REGION_DNA_BINDING	GO_POSITIVE_REGULATION_OF_TRANSCRIPTION_REGULATORY_REGION_DNA_BINDING		25	-0.314971	-0.995988	0.464286	0.444896	1	9559	tags=28%, list=17%, signal=34%
GO_ATP_DEPENDENT_CHROMATIN_REMODELING	GO_ATP_DEPENDENT_CHROMATIN_REMODELING		90	-0.303838	-0.995769	0.442231	0.444859	1	9263	tags=30%, list=17%, signal=36%
GO_REGULATION_OF_NUCLEOTIDE_METABOLIC_PROCESS	GO_REGULATION_OF_NUCLEOTIDE_METABOLIC_PROCESS		122	-0.274262	-0.995483	0.451477	0.444914	1	13669	tags=33%, list=25%, signal=43%
GO_REGULATION_OF_OXIDATIVE_STRESS_INDUCED_INTRINSIC_APOPTOTIC_SIGNALING_PATHWAY	GO_REGULATION_OF_OXIDATIVE_STRESS_INDUCED_INTRINSIC_APOPTOTIC_SIGNALING_PATHWAY		27	-0.309814	-0.995416	0.452191	0.444686	1	9349	tags=30%, list=17%, signal=36%
GO_CYTOSOLIC_TRANSPORT	GO_CYTOSOLIC_TRANSPORT		165	-0.309954	-0.994619	0.471816	0.445472	1	10796	tags=34%, list=19%, signal=42%
GO_DNA_METHYLATION	GO_DNA_METHYLATION		70	-0.291647	-0.994497	0.460606	0.445308	1	13012	tags=34%, list=23%, signal=45%
GO_NEGATIVE_REGULATION_OF_GLIOGENESIS	GO_NEGATIVE_REGULATION_OF_GLIOGENESIS		45	-0.291953	-0.994168	0.456212	0.445461	1	6487	tags=18%, list=12%, signal=20%
GO_NEGATIVE_REGULATION_OF_RNA_SPLICING	GO_NEGATIVE_REGULATION_OF_RNA_SPLICING		26	-0.377137	-0.993857	0.462926	0.445517	1	13489	tags=38%, list=24%, signal=51%
GO_POSTSYNAPTIC_NEUROTRANSMITTER_RECEPTOR_INTERNALIZATION	GO_POSTSYNAPTIC_NEUROTRANSMITTER_RECEPTOR_INTERNALIZATION		20	-0.353279	-0.993465	0.47479	0.445727	1	3129	tags=15%, list=6%, signal=16%
GO_REGULATION_OF_CARDIAC_MUSCLE_CELL_DIFFERENTIATION	GO_REGULATION_OF_CARDIAC_MUSCLE_CELL_DIFFERENTIATION		46	-0.291604	-0.993124	0.440083	0.445876	1	11504	tags=28%, list=21%, signal=36%
GO_MODULATION_BY_HOST_OF_VIRAL_PROCESS	GO_MODULATION_BY_HOST_OF_VIRAL_PROCESS		30	-0.30978	-0.99267	0.472393	0.446176	1	5015	tags=17%, list=9%, signal=18%
GO_RNA_PHOSPHODIESTER_BOND_HYDROLYSIS_EXONUCLEOLYTIC	GO_RNA_PHOSPHODIESTER_BOND_HYDROLYSIS_EXONUCLEOLYTIC		44	-0.327538	-0.992137	0.493852	0.44662	1	10412	tags=27%, list=19%, signal=34%
GO_POSITIVE_REGULATION_OF_VIRAL_GENOME_REPLICATION	GO_POSITIVE_REGULATION_OF_VIRAL_GENOME_REPLICATION		37	-0.337957	-0.991131	0.473795	0.447653	1	12715	tags=43%, list=23%, signal=56%
GO_REGULATION_OF_PROTEIN_TARGETING_TO_MITOCHONDRION	GO_REGULATION_OF_PROTEIN_TARGETING_TO_MITOCHONDRION		45	-0.303832	-0.9911	0.498934	0.447358	1	11828	tags=33%, list=21%, signal=42%
GO_REGULATION_OF_BROWN_FAT_CELL_DIFFERENTIATION	GO_REGULATION_OF_BROWN_FAT_CELL_DIFFERENTIATION		24	-0.354806	-0.990928	0.470942	0.447282	1	14702	tags=42%, list=27%, signal=57%
GO_NUCLEAR_MIGRATION	GO_NUCLEAR_MIGRATION		23	-0.3852	-0.990788	0.458159	0.447155	1	6896	tags=30%, list=12%, signal=35%
GO_REGULATION_OF_LONG_TERM_SYNAPTIC_POTENTIATION	GO_REGULATION_OF_LONG_TERM_SYNAPTIC_POTENTIATION		48	-0.302246	-0.989736	0.446352	0.448307	1	9390	tags=27%, list=17%, signal=33%
GO_RESPONSE_TO_ACIDIC_PH	GO_RESPONSE_TO_ACIDIC_PH		25	-0.321162	-0.989636	0.455268	0.44812	1	6830	tags=20%, list=12%, signal=23%
GO_POSITIVE_REGULATION_OF_CYCLIN_DEPENDENT_PROTEIN_KINASE_ACTIVITY	GO_POSITIVE_REGULATION_OF_CYCLIN_DEPENDENT_PROTEIN_KINASE_ACTIVITY		35	-0.319278	-0.989355	0.462151	0.448191	1	9642	tags=26%, list=17%, signal=31%
GO_VIRION_ASSEMBLY	GO_VIRION_ASSEMBLY		40	-0.341266	-0.988982	0.473477	0.448364	1	10565	tags=33%, list=19%, signal=40%
GO_FUSION_OF_SPERM_TO_EGG_PLASMA_MEMBRANE_INVOLVED_IN_SINGLE_FERTILIZATION	GO_FUSION_OF_SPERM_TO_EGG_PLASMA_MEMBRANE_INVOLVED_IN_SINGLE_FERTILIZATION		22	-0.337602	-0.988637	0.479079	0.448499	1	10040	tags=32%, list=18%, signal=39%
GO_NEGATIVE_REGULATION_OF_GLIAL_CELL_DIFFERENTIATION	GO_NEGATIVE_REGULATION_OF_GLIAL_CELL_DIFFERENTIATION		28	-0.317304	-0.988251	0.426229	0.448745	1	6487	tags=18%, list=12%, signal=20%
GO_HISTONE_H3_K9_MODIFICATION	GO_HISTONE_H3_K9_MODIFICATION		49	-0.336592	-0.987719	0.475904	0.449094	1	12512	tags=35%, list=23%, signal=45%
GO_GLYCOSIDE_METABOLIC_PROCESS	GO_GLYCOSIDE_METABOLIC_PROCESS		21	-0.407704	-0.987659	0.498062	0.448832	1	6911	tags=29%, list=12%, signal=33%
GO_NITRIC_OXIDE_SYNTHASE_BIOSYNTHETIC_PROCESS	GO_NITRIC_OXIDE_SYNTHASE_BIOSYNTHETIC_PROCESS		20	-0.384831	-0.986488	0.456332	0.450229	1	7939	tags=25%, list=14%, signal=29%
GO_EMBRYONIC_APPENDAGE_MORPHOGENESIS	GO_EMBRYONIC_APPENDAGE_MORPHOGENESIS		127	-0.295853	-0.986172	0.446121	0.4504	1	8414	tags=24%, list=15%, signal=28%
GO_SYNAPTIC_MEMBRANE_ADHESION	GO_SYNAPTIC_MEMBRANE_ADHESION		28	-0.333948	-0.985778	0.472574	0.450593	1	13300	tags=43%, list=24%, signal=56%
GO_MALE_MEIOSIS_I	GO_MALE_MEIOSIS_I		24	-0.324759	-0.984235	0.476289	0.452415	1	6549	tags=25%, list=12%, signal=28%
GO_ACTIN_MEDIATED_CELL_CONTRACTION	GO_ACTIN_MEDIATED_CELL_CONTRACTION		120	-0.314714	-0.983677	0.499002	0.45287	1	6251	tags=22%, list=11%, signal=24%
GO_CHROMATIN_REMODELING_AT_CENTROMERE	GO_CHROMATIN_REMODELING_AT_CENTROMERE		47	-0.334078	-0.983165	0.481113	0.453236	1	9263	tags=30%, list=17%, signal=36%
GO_NUCLEOTIDE_SUGAR_BIOSYNTHETIC_PROCESS	GO_NUCLEOTIDE_SUGAR_BIOSYNTHETIC_PROCESS		23	-0.357062	-0.983028	0.491968	0.453104	1	7242	tags=35%, list=13%, signal=40%
GO_TRIGLYCERIDE_CATABOLIC_PROCESS	GO_TRIGLYCERIDE_CATABOLIC_PROCESS		38	-0.313204	-0.982069	0.464363	0.454083	1	10664	tags=29%, list=19%, signal=36%
GO_VESICLE_FUSION_TO_PLASMA_MEMBRANE	GO_VESICLE_FUSION_TO_PLASMA_MEMBRANE		24	-0.315181	-0.978769	0.467456	0.458401	1	8312	tags=29%, list=15%, signal=34%
GO_APPENDAGE_MORPHOGENESIS	GO_APPENDAGE_MORPHOGENESIS		150	-0.291208	-0.978226	0.481562	0.458832	1	8414	tags=23%, list=15%, signal=27%
GO_PROTEIN_K63_LINKED_DEUBIQUITINATION	GO_PROTEIN_K63_LINKED_DEUBIQUITINATION		35	-0.340453	-0.976633	0.479042	0.460808	1	13982	tags=37%, list=25%, signal=50%
GO_RESPONSE_TO_PROSTAGLANDIN	GO_RESPONSE_TO_PROSTAGLANDIN		32	-0.323657	-0.97593	0.476395	0.46144	1	11022	tags=34%, list=20%, signal=43%
GO_MESODERM_MORPHOGENESIS	GO_MESODERM_MORPHOGENESIS		76	-0.286628	-0.975891	0.479079	0.461167	1	12340	tags=36%, list=22%, signal=46%
GO_ARTERY_DEVELOPMENT	GO_ARTERY_DEVELOPMENT		98	-0.296233	-0.975394	0.489669	0.461566	1	6440	tags=20%, list=12%, signal=23%
GO_NEUROPEPTIDE_SIGNALING_PATHWAY	GO_NEUROPEPTIDE_SIGNALING_PATHWAY		105	-0.259721	-0.974599	0.490982	0.462382	1	12151	tags=29%, list=22%, signal=37%
GO_IONOTROPIC_GLUTAMATE_RECEPTOR_SIGNALING_PATHWAY	GO_IONOTROPIC_GLUTAMATE_RECEPTOR_SIGNALING_PATHWAY		26	-0.322913	-0.974479	0.506224	0.462211	1	12232	tags=31%, list=22%, signal=39%
GO_EMBRYONIC_DIGIT_MORPHOGENESIS	GO_EMBRYONIC_DIGIT_MORPHOGENESIS		61	-0.31729	-0.97442	0.485169	0.461952	1	13358	tags=38%, list=24%, signal=50%
GO_NEGATIVE_REGULATION_OF_VASCULAR_ENDOTHELIAL_GROWTH_FACTOR_PRODUCTION	GO_NEGATIVE_REGULATION_OF_VASCULAR_ENDOTHELIAL_GROWTH_FACTOR_PRODUCTION		22	-0.311527	-0.973453	0.466151	0.462948	1	24632	tags=36%, list=44%, signal=65%
GO_DNA_REPLICATION_INDEPENDENT_NUCLEOSOME_ORGANIZATION	GO_DNA_REPLICATION_INDEPENDENT_NUCLEOSOME_ORGANIZATION		54	-0.324855	-0.972991	0.484725	0.463243	1	4831	tags=20%, list=9%, signal=22%
GO_REGULATION_OF_LIPOPOLYSACCHARIDE_MEDIATED_SIGNALING_PATHWAY	GO_REGULATION_OF_LIPOPOLYSACCHARIDE_MEDIATED_SIGNALING_PATHWAY		26	-0.342616	-0.972541	0.476695	0.463552	1	6890	tags=23%, list=12%, signal=26%
GO_MAINTENANCE_OF_CELL_NUMBER	GO_MAINTENANCE_OF_CELL_NUMBER		164	-0.279691	-0.971908	0.484536	0.464111	1	12698	tags=30%, list=23%, signal=39%
GO_LYMPHOID_PROGENITOR_CELL_DIFFERENTIATION	GO_LYMPHOID_PROGENITOR_CELL_DIFFERENTIATION		20	-0.349576	-0.971812	0.454183	0.463914	1	6800	tags=25%, list=12%, signal=28%
GO_APOPTOTIC_PROCESS_INVOLVED_IN_MORPHOGENESIS	GO_APOPTOTIC_PROCESS_INVOLVED_IN_MORPHOGENESIS		26	-0.330942	-0.970533	0.490364	0.46529	1	8355	tags=31%, list=15%, signal=36%
GO_NEGATIVE_REGULATION_OF_MULTI_ORGANISM_PROCESS	GO_NEGATIVE_REGULATION_OF_MULTI_ORGANISM_PROCESS		29	-0.320585	-0.968863	0.501031	0.467327	1	6594	tags=21%, list=12%, signal=23%
GO_SOMITOGENESIS	GO_SOMITOGENESIS		70	-0.294984	-0.96766	0.490486	0.468741	1	12144	tags=30%, list=22%, signal=38%
GO_PROTEIN_DEGLYCOSYLATION	GO_PROTEIN_DEGLYCOSYLATION		28	-0.350177	-0.967497	0.495984	0.468642	1	9266	tags=32%, list=17%, signal=39%
GO_TORC1_SIGNALING	GO_TORC1_SIGNALING		46	-0.304648	-0.967334	0.529532	0.468521	1	10490	tags=30%, list=19%, signal=38%
GO_REGULATION_OF_LIPOPROTEIN_PARTICLE_CLEARANCE	GO_REGULATION_OF_LIPOPROTEIN_PARTICLE_CLEARANCE		29	-0.302074	-0.967118	0.498969	0.468513	1	2971	tags=10%, list=5%, signal=11%
GO_RESPONSE_TO_ELECTRICAL_STIMULUS	GO_RESPONSE_TO_ELECTRICAL_STIMULUS		42	-0.27602	-0.96658	0.506903	0.468944	1	8011	tags=24%, list=14%, signal=28%
GO_MALE_GENITALIA_DEVELOPMENT	GO_MALE_GENITALIA_DEVELOPMENT		23	-0.33046	-0.965988	0.481319	0.469461	1	15232	tags=43%, list=27%, signal=60%
GO_CELLULAR_POLYSACCHARIDE_CATABOLIC_PROCESS	GO_CELLULAR_POLYSACCHARIDE_CATABOLIC_PROCESS		24	-0.320294	-0.963925	0.527383	0.471978	1	10239	tags=29%, list=18%, signal=36%
GO_PROTEIN_IMPORT	GO_PROTEIN_IMPORT		200	-0.265952	-0.963919	0.501044	0.471643	1	13436	tags=33%, list=24%, signal=43%
GO_SENSORY_PERCEPTION_OF_PAIN	GO_SENSORY_PERCEPTION_OF_PAIN		106	-0.260722	-0.963843	0.493878	0.47141	1	12925	tags=28%, list=23%, signal=37%
GO_REGULATION_OF_CARBOHYDRATE_CATABOLIC_PROCESS	GO_REGULATION_OF_CARBOHYDRATE_CATABOLIC_PROCESS		90	-0.289062	-0.96282	0.494669	0.472515	1	13436	tags=32%, list=24%, signal=42%
GO_EMBRYONIC_PLACENTA_MORPHOGENESIS	GO_EMBRYONIC_PLACENTA_MORPHOGENESIS		25	-0.329408	-0.961458	0.490835	0.474213	1	7912	tags=32%, list=14%, signal=37%
GO_PROTEIN_REFOLDING	GO_PROTEIN_REFOLDING		23	-0.343224	-0.961186	0.5	0.474257	1	7759	tags=22%, list=14%, signal=25%
GO_BLASTOCYST_FORMATION	GO_BLASTOCYST_FORMATION		39	-0.303105	-0.960857	0.502982	0.474352	1	8659	tags=26%, list=16%, signal=30%
GO_NEGATIVE_REGULATION_OF_NUCLEOCYTOPLASMIC_TRANSPORT	GO_NEGATIVE_REGULATION_OF_NUCLEOCYTOPLASMIC_TRANSPORT		21	-0.314083	-0.959731	0.507431	0.475624	1	8867	tags=33%, list=16%, signal=40%
GO_TYPE_B_PANCREATIC_CELL_PROLIFERATION	GO_TYPE_B_PANCREATIC_CELL_PROLIFERATION		22	-0.310644	-0.959655	0.5	0.475386	1	12650	tags=45%, list=23%, signal=59%
GO_ADRENERGIC_RECEPTOR_SIGNALING_PATHWAY	GO_ADRENERGIC_RECEPTOR_SIGNALING_PATHWAY		29	-0.321404	-0.959593	0.504202	0.475125	1	10203	tags=31%, list=18%, signal=38%
GO_REGULATION_OF_CALCIUM_MEDIATED_SIGNALING	GO_REGULATION_OF_CALCIUM_MEDIATED_SIGNALING		98	-0.263242	-0.95706	0.503006	0.478497	1	11504	tags=30%, list=21%, signal=37%
GO_POSITIVE_REGULATION_OF_PHOSPHOPROTEIN_PHOSPHATASE_ACTIVITY	GO_POSITIVE_REGULATION_OF_PHOSPHOPROTEIN_PHOSPHATASE_ACTIVITY		21	-0.352299	-0.956309	0.501023	0.479226	1	13414	tags=43%, list=24%, signal=57%
GO_SECRETORY_GRANULE_ORGANIZATION	GO_SECRETORY_GRANULE_ORGANIZATION		37	-0.287891	-0.955985	0.508911	0.479397	1	10418	tags=32%, list=19%, signal=40%
GO_POSITIVE_REGULATION_OF_AMINE_TRANSPORT	GO_POSITIVE_REGULATION_OF_AMINE_TRANSPORT		38	-0.293743	-0.95507	0.497925	0.480406	1	9809	tags=24%, list=18%, signal=29%
GO_POSITIVE_REGULATION_OF_PROTEIN_DEACETYLATION	GO_POSITIVE_REGULATION_OF_PROTEIN_DEACETYLATION		21	-0.338943	-0.954763	0.521654	0.480508	1	8367	tags=33%, list=15%, signal=39%
GO_POSITIVE_REGULATION_OF_CARDIOCYTE_DIFFERENTIATION	GO_POSITIVE_REGULATION_OF_CARDIOCYTE_DIFFERENTIATION		35	-0.286093	-0.954543	0.52766	0.480482	1	1286	tags=9%, list=2%, signal=9%
GO_DETECTION_OF_ABIOTIC_STIMULUS	GO_DETECTION_OF_ABIOTIC_STIMULUS		143	-0.240879	-0.951439	0.514286	0.484679	1	12569	tags=24%, list=23%, signal=31%
GO_REGULATION_OF_GENE_SILENCING	GO_REGULATION_OF_GENE_SILENCING		136	-0.280191	-0.950256	0.534553	0.486054	1	12987	tags=35%, list=23%, signal=45%
GO_BLOOD_VESSEL_REMODELING	GO_BLOOD_VESSEL_REMODELING		40	-0.305785	-0.950026	0.493507	0.486035	1	6440	tags=23%, list=12%, signal=25%
GO_RESPONSE_TO_MISFOLDED_PROTEIN	GO_RESPONSE_TO_MISFOLDED_PROTEIN		25	-0.334681	-0.949776	0.529175	0.486047	1	9984	tags=28%, list=18%, signal=34%
GO_PROTEIN_AUTOPROCESSING	GO_PROTEIN_AUTOPROCESSING		21	-0.324827	-0.94973	0.530146	0.485764	1	8655	tags=24%, list=16%, signal=28%
GO_CHROMATIN_ORGANIZATION_INVOLVED_IN_REGULATION_OF_TRANSCRIPTION	GO_CHROMATIN_ORGANIZATION_INVOLVED_IN_REGULATION_OF_TRANSCRIPTION		154	-0.273921	-0.949588	0.513944	0.485623	1	9274	tags=25%, list=17%, signal=30%
GO_CELLULAR_RESPONSE_TO_PH	GO_CELLULAR_RESPONSE_TO_PH		22	-0.311903	-0.949031	0.516315	0.486068	1	14308	tags=27%, list=26%, signal=37%
GO_DETECTION_OF_MECHANICAL_STIMULUS_INVOLVED_IN_SENSORY_PERCEPTION	GO_DETECTION_OF_MECHANICAL_STIMULUS_INVOLVED_IN_SENSORY_PERCEPTION		31	-0.30715	-0.948441	0.519507	0.486548	1	5650	tags=19%, list=10%, signal=22%
GO_HOMOLOGOUS_RECOMBINATION	GO_HOMOLOGOUS_RECOMBINATION		56	-0.295459	-0.94801	0.519588	0.486807	1	11640	tags=36%, list=21%, signal=45%
GO_NEGATIVE_REGULATION_OF_HISTONE_METHYLATION	GO_NEGATIVE_REGULATION_OF_HISTONE_METHYLATION		21	-0.359066	-0.946664	0.521825	0.488352	1	13717	tags=43%, list=25%, signal=57%
GO_THYMUS_DEVELOPMENT	GO_THYMUS_DEVELOPMENT		46	-0.296241	-0.94589	0.516598	0.489124	1	6471	tags=20%, list=12%, signal=22%
GO_INNATE_IMMUNE_RESPONSE_IN_MUCOSA	GO_INNATE_IMMUNE_RESPONSE_IN_MUCOSA		26	-0.343526	-0.945713	0.522822	0.489011	1	11900	tags=27%, list=21%, signal=34%
GO_NUCLEOBASE_METABOLIC_PROCESS	GO_NUCLEOBASE_METABOLIC_PROCESS		35	-0.322939	-0.945114	0.534021	0.489524	1	7618	tags=20%, list=14%, signal=23%
GO_NUCLEAR_TRANSCRIBED_MRNA_CATABOLIC_PROCESS_DEADENYLATION_DEPENDENT_DECAY	GO_NUCLEAR_TRANSCRIBED_MRNA_CATABOLIC_PROCESS_DEADENYLATION_DEPENDENT_DECAY		77	-0.297491	-0.94459	0.540816	0.48992	1	12876	tags=30%, list=23%, signal=39%
GO_REGULATION_OF_PLATELET_ACTIVATION	GO_REGULATION_OF_PLATELET_ACTIVATION		36	-0.311456	-0.943238	0.524793	0.491609	1	2552	tags=14%, list=5%, signal=15%
GO_NEGATIVE_REGULATION_OF_SIGNAL_TRANSDUCTION_BY_P53_CLASS_MEDIATOR	GO_NEGATIVE_REGULATION_OF_SIGNAL_TRANSDUCTION_BY_P53_CLASS_MEDIATOR		32	-0.293771	-0.942254	0.554852	0.492717	1	8367	tags=22%, list=15%, signal=26%
GO_DNA_METHYLATION_OR_DEMETHYLATION	GO_DNA_METHYLATION_OR_DEMETHYLATION		94	-0.267738	-0.939587	0.542169	0.496215	1	13012	tags=33%, list=23%, signal=43%
GO_PROTEIN_QUALITY_CONTROL_FOR_MISFOLDED_OR_INCOMPLETELY_SYNTHESIZED_PROTEINS	GO_PROTEIN_QUALITY_CONTROL_FOR_MISFOLDED_OR_INCOMPLETELY_SYNTHESIZED_PROTEINS		29	-0.331727	-0.939164	0.544715	0.496494	1	9984	tags=24%, list=18%, signal=29%
GO_POSITIVE_REGULATION_OF_SODIUM_ION_TRANSMEMBRANE_TRANSPORT	GO_POSITIVE_REGULATION_OF_SODIUM_ION_TRANSMEMBRANE_TRANSPORT		21	-0.315254	-0.93863	0.530271	0.496971	1	5506	tags=19%, list=10%, signal=21%
GO_REPLICATION_FORK_PROCESSING	GO_REPLICATION_FORK_PROCESSING		35	-0.337556	-0.935215	0.529046	0.501636	1	7705	tags=26%, list=14%, signal=30%
GO_HEMATOPOIETIC_STEM_CELL_PROLIFERATION	GO_HEMATOPOIETIC_STEM_CELL_PROLIFERATION		26	-0.322417	-0.935153	0.512605	0.501388	1	5559	tags=23%, list=10%, signal=26%
GO_SCF_DEPENDENT_PROTEASOMAL_UBIQUITIN_DEPENDENT_PROTEIN_CATABOLIC_PROCESS	GO_SCF_DEPENDENT_PROTEASOMAL_UBIQUITIN_DEPENDENT_PROTEIN_CATABOLIC_PROCESS		93	-0.28641	-0.933967	0.525667	0.502769	1	15065	tags=37%, list=27%, signal=50%
GO_MONOVALENT_INORGANIC_ANION_HOMEOSTASIS	GO_MONOVALENT_INORGANIC_ANION_HOMEOSTASIS		26	-0.311185	-0.933455	0.535565	0.503189	1	13072	tags=38%, list=24%, signal=50%
GO_REGULATION_OF_CHROMATIN_ORGANIZATION	GO_REGULATION_OF_CHROMATIN_ORGANIZATION		195	-0.272766	-0.933155	0.554217	0.503258	1	8352	tags=22%, list=15%, signal=26%
GO_PYRIMIDINE_CONTAINING_COMPOUND_CATABOLIC_PROCESS	GO_PYRIMIDINE_CONTAINING_COMPOUND_CATABOLIC_PROCESS		39	-0.292597	-0.933107	0.548781	0.50298	1	8054	tags=21%, list=15%, signal=24%
GO_STRIATED_MUSCLE_ADAPTATION	GO_STRIATED_MUSCLE_ADAPTATION		52	-0.310913	-0.929783	0.563525	0.507691	1	3970	tags=13%, list=7%, signal=14%
GO_DNA_DOUBLE_STRAND_BREAK_PROCESSING	GO_DNA_DOUBLE_STRAND_BREAK_PROCESSING		25	-0.358194	-0.928805	0.553684	0.508888	1	10174	tags=28%, list=18%, signal=34%
GO_RHODOPSIN_MEDIATED_SIGNALING_PATHWAY	GO_RHODOPSIN_MEDIATED_SIGNALING_PATHWAY		29	-0.289717	-0.928079	0.570499	0.509643	1	12514	tags=28%, list=23%, signal=36%
GO_GLOBAL_GENOME_NUCLEOTIDE_EXCISION_REPAIR	GO_GLOBAL_GENOME_NUCLEOTIDE_EXCISION_REPAIR		26	-0.313838	-0.927131	0.543825	0.510691	1	4434	tags=19%, list=8%, signal=21%
GO_POSITIVE_REGULATION_OF_DEPHOSPHORYLATION	GO_POSITIVE_REGULATION_OF_DEPHOSPHORYLATION		58	-0.284313	-0.926632	0.533605	0.511099	1	10560	tags=31%, list=19%, signal=38%
GO_MIRNA_METABOLIC_PROCESS	GO_MIRNA_METABOLIC_PROCESS		30	-0.342337	-0.926326	0.546012	0.511189	1	11509	tags=30%, list=21%, signal=38%
GO_CEREBELLAR_CORTEX_MORPHOGENESIS	GO_CEREBELLAR_CORTEX_MORPHOGENESIS		33	-0.313992	-0.925879	0.556263	0.511488	1	12788	tags=39%, list=23%, signal=51%
GO_MICROTUBULE_ORGANIZING_CENTER_ORGANIZATION	GO_MICROTUBULE_ORGANIZING_CENTER_ORGANIZATION		136	-0.283854	-0.925311	0.515091	0.51198	1	9936	tags=25%, list=18%, signal=30%
GO_POSITIVE_REGULATION_OF_DOUBLE_STRAND_BREAK_REPAIR	GO_POSITIVE_REGULATION_OF_DOUBLE_STRAND_BREAK_REPAIR		36	-0.305208	-0.925259	0.556008	0.511695	1	3608	tags=17%, list=7%, signal=18%
GO_RNA_POLYADENYLATION	GO_RNA_POLYADENYLATION		48	-0.33335	-0.924768	0.569106	0.512006	1	12890	tags=33%, list=23%, signal=43%
GO_REGULATION_OF_AMINO_ACID_TRANSPORT	GO_REGULATION_OF_AMINO_ACID_TRANSPORT		36	-0.288541	-0.923982	0.553684	0.512795	1	13055	tags=33%, list=24%, signal=44%
GO_NUCLEOTIDE_EXCISION_REPAIR_PREINCISION_COMPLEX_STABILIZATION	GO_NUCLEOTIDE_EXCISION_REPAIR_PREINCISION_COMPLEX_STABILIZATION		21	-0.324299	-0.921504	0.570281	0.516127	1	10834	tags=29%, list=20%, signal=35%
GO_POSITIVE_REGULATION_OF_CELL_ADHESION_MEDIATED_BY_INTEGRIN	GO_POSITIVE_REGULATION_OF_CELL_ADHESION_MEDIATED_BY_INTEGRIN		21	-0.339867	-0.921036	0.540041	0.516461	1	5864	tags=19%, list=11%, signal=21%
GO_CELL_AGGREGATION	GO_CELL_AGGREGATION		24	-0.30634	-0.919823	0.563126	0.517956	1	8515	tags=29%, list=15%, signal=34%
GO_NEURON_FATE_COMMITMENT	GO_NEURON_FATE_COMMITMENT		67	-0.268294	-0.919281	0.581933	0.518445	1	11504	tags=25%, list=21%, signal=32%
GO_CENTRIOLE_ASSEMBLY	GO_CENTRIOLE_ASSEMBLY		40	-0.319905	-0.9189	0.545639	0.518661	1	14424	tags=40%, list=26%, signal=54%
GO_POSITIVE_REGULATION_OF_PROTEIN_CONTAINING_COMPLEX_DISASSEMBLY	GO_POSITIVE_REGULATION_OF_PROTEIN_CONTAINING_COMPLEX_DISASSEMBLY		37	-0.301422	-0.918829	0.576687	0.518416	1	12267	tags=30%, list=22%, signal=38%
GO_POSITIVE_REGULATION_OF_CELL_MIGRATION_INVOLVED_IN_SPROUTING_ANGIOGENESIS	GO_POSITIVE_REGULATION_OF_CELL_MIGRATION_INVOLVED_IN_SPROUTING_ANGIOGENESIS		34	-0.300225	-0.91702	0.545825	0.520687	1	3420	tags=15%, list=6%, signal=16%
GO_ASPARTATE_FAMILY_AMINO_ACID_BIOSYNTHETIC_PROCESS	GO_ASPARTATE_FAMILY_AMINO_ACID_BIOSYNTHETIC_PROCESS		21	-0.348564	-0.91685	0.526423	0.520572	1	14812	tags=48%, list=27%, signal=65%
GO_NEUROTROPHIN_TRK_RECEPTOR_SIGNALING_PATHWAY	GO_NEUROTROPHIN_TRK_RECEPTOR_SIGNALING_PATHWAY		33	-0.311418	-0.915005	0.545073	0.522933	1	16497	tags=45%, list=30%, signal=65%
GO_ORGAN_INDUCTION	GO_ORGAN_INDUCTION		24	-0.318504	-0.911078	0.557851	0.528605	1	9559	tags=25%, list=17%, signal=30%
GO_CILIARY_BASAL_BODY_PLASMA_MEMBRANE_DOCKING	GO_CILIARY_BASAL_BODY_PLASMA_MEMBRANE_DOCKING		95	-0.284276	-0.91062	0.548708	0.528861	1	13635	tags=35%, list=25%, signal=46%
GO_DECIDUALIZATION	GO_DECIDUALIZATION		25	-0.282382	-0.908654	0.576238	0.531432	1	6640	tags=20%, list=12%, signal=23%
GO_REGULATION_OF_CHROMATIN_BINDING	GO_REGULATION_OF_CHROMATIN_BINDING		23	-0.322109	-0.907199	0.576132	0.533174	1	12052	tags=43%, list=22%, signal=56%
GO_POSITIVE_REGULATION_OF_LIPID_TRANSPORT	GO_POSITIVE_REGULATION_OF_LIPID_TRANSPORT		70	-0.251105	-0.904125	0.588822	0.537537	1	8716	tags=17%, list=16%, signal=20%
GO_REGULATION_OF_CYCLASE_ACTIVITY	GO_REGULATION_OF_CYCLASE_ACTIVITY		48	-0.268111	-0.89946	0.621622	0.544204	1	5816	tags=17%, list=10%, signal=19%
GO_POSITIVE_REGULATION_OF_GLYCOPROTEIN_METABOLIC_PROCESS	GO_POSITIVE_REGULATION_OF_GLYCOPROTEIN_METABOLIC_PROCESS		26	-0.31212	-0.898706	0.622641	0.544955	1	8959	tags=27%, list=16%, signal=32%
GO_RESPONSE_TO_FLUID_SHEAR_STRESS	GO_RESPONSE_TO_FLUID_SHEAR_STRESS		34	-0.301117	-0.894802	0.576699	0.550419	1	9351	tags=32%, list=17%, signal=39%
GO_POSITIVE_REGULATION_OF_NOTCH_SIGNALING_PATHWAY	GO_POSITIVE_REGULATION_OF_NOTCH_SIGNALING_PATHWAY		55	-0.278808	-0.894346	0.61945	0.550711	1	9351	tags=24%, list=17%, signal=28%
GO_PROTEIN_LOCALIZATION_TO_CYTOSKELETON	GO_PROTEIN_LOCALIZATION_TO_CYTOSKELETON		57	-0.292571	-0.893906	0.575258	0.551002	1	12084	tags=32%, list=22%, signal=40%
GO_NUCLEUS_ORGANIZATION	GO_NUCLEUS_ORGANIZATION		133	-0.273571	-0.893711	0.575053	0.5509	1	12300	tags=32%, list=22%, signal=40%
GO_PROTEOGLYCAN_BIOSYNTHETIC_PROCESS	GO_PROTEOGLYCAN_BIOSYNTHETIC_PROCESS		64	-0.289843	-0.892177	0.575053	0.552904	1	8959	tags=23%, list=16%, signal=28%
GO_OLFACTORY_LOBE_DEVELOPMENT	GO_OLFACTORY_LOBE_DEVELOPMENT		33	-0.292475	-0.891066	0.590062	0.554385	1	8897	tags=24%, list=16%, signal=29%
GO_SPHINGOID_METABOLIC_PROCESS	GO_SPHINGOID_METABOLIC_PROCESS		21	-0.324872	-0.890905	0.63147	0.554242	1	9257	tags=33%, list=17%, signal=40%
GO_REGULATION_OF_TRANSLATIONAL_ELONGATION	GO_REGULATION_OF_TRANSLATIONAL_ELONGATION		21	-0.32207	-0.889857	0.594262	0.555434	1	18138	tags=57%, list=33%, signal=85%
GO_BETA_CATENIN_TCF_COMPLEX_ASSEMBLY	GO_BETA_CATENIN_TCF_COMPLEX_ASSEMBLY		30	-0.328166	-0.888892	0.577406	0.556671	1	12272	tags=40%, list=22%, signal=51%
GO_DETECTION_OF_TEMPERATURE_STIMULUS	GO_DETECTION_OF_TEMPERATURE_STIMULUS		23	-0.289898	-0.887845	0.594262	0.557955	1	11279	tags=30%, list=20%, signal=38%
GO_NEGATIVE_REGULATION_OF_TISSUE_REMODELING	GO_NEGATIVE_REGULATION_OF_TISSUE_REMODELING		22	-0.315725	-0.885844	0.607803	0.56066	1	11279	tags=32%, list=20%, signal=40%
GO_REGULATION_OF_ARP2_3_COMPLEX_MEDIATED_ACTIN_NUCLEATION	GO_REGULATION_OF_ARP2_3_COMPLEX_MEDIATED_ACTIN_NUCLEATION		20	-0.323384	-0.884611	0.597959	0.562251	1	6274	tags=15%, list=11%, signal=17%
GO_DNA_TEMPLATED_TRANSCRIPTION_ELONGATION	GO_DNA_TEMPLATED_TRANSCRIPTION_ELONGATION		113	-0.276533	-0.881508	0.599198	0.566732	1	13047	tags=29%, list=24%, signal=38%
GO_RESPONSE_TO_PAIN	GO_RESPONSE_TO_PAIN		30	-0.296957	-0.879421	0.655319	0.569709	1	7045	tags=23%, list=13%, signal=27%
GO_POSITIVE_REGULATION_OF_CHROMATIN_ORGANIZATION	GO_POSITIVE_REGULATION_OF_CHROMATIN_ORGANIZATION		106	-0.270132	-0.879089	0.607803	0.569901	1	7001	tags=20%, list=13%, signal=23%
GO_DNA_TEMPLATED_TRANSCRIPTION_TERMINATION	GO_DNA_TEMPLATED_TRANSCRIPTION_TERMINATION		75	-0.290389	-0.878077	0.624746	0.571139	1	13012	tags=32%, list=23%, signal=42%
GO_SNRNA_TRANSCRIPTION	GO_SNRNA_TRANSCRIPTION		74	-0.289331	-0.876482	0.603306	0.573215	1	13230	tags=35%, list=24%, signal=46%
GO_MIDDLE_EAR_MORPHOGENESIS	GO_MIDDLE_EAR_MORPHOGENESIS		20	-0.330909	-0.876026	0.601253	0.573493	1	18284	tags=50%, list=33%, signal=75%
GO_CHROMOSOME_SEPARATION	GO_CHROMOSOME_SEPARATION		94	-0.271184	-0.874509	0.596349	0.575487	1	12146	tags=33%, list=22%, signal=42%
GO_CALCIUM_ION_REGULATED_EXOCYTOSIS_OF_NEUROTRANSMITTER	GO_CALCIUM_ION_REGULATED_EXOCYTOSIS_OF_NEUROTRANSMITTER		23	-0.30595	-0.873533	0.633745	0.576686	1	6532	tags=26%, list=12%, signal=30%
GO_SENSORY_PERCEPTION_OF_BITTER_TASTE	GO_SENSORY_PERCEPTION_OF_BITTER_TASTE		41	-0.268099	-0.872261	0.65762	0.578269	1	13817	tags=27%, list=25%, signal=36%
GO_PIGMENT_GRANULE_ORGANIZATION	GO_PIGMENT_GRANULE_ORGANIZATION		28	-0.293625	-0.871566	0.634694	0.578945	1	8219	tags=21%, list=15%, signal=25%
GO_NEGATIVE_REGULATION_OF_AMINE_TRANSPORT	GO_NEGATIVE_REGULATION_OF_AMINE_TRANSPORT		27	-0.306088	-0.870012	0.61945	0.580955	1	6210	tags=22%, list=11%, signal=25%
GO_CHAPERONE_COFACTOR_DEPENDENT_PROTEIN_REFOLDING	GO_CHAPERONE_COFACTOR_DEPENDENT_PROTEIN_REFOLDING		32	-0.295476	-0.865444	0.615542	0.587851	1	10542	tags=25%, list=19%, signal=31%
GO_RNA_3_END_PROCESSING	GO_RNA_3_END_PROCESSING		153	-0.269115	-0.860338	0.618	0.595747	1	13748	tags=29%, list=25%, signal=38%
GO_DEOXYRIBONUCLEOTIDE_METABOLIC_PROCESS	GO_DEOXYRIBONUCLEOTIDE_METABOLIC_PROCESS		35	-0.280558	-0.860025	0.627723	0.595842	1	12052	tags=34%, list=22%, signal=44%
GO_POSITIVE_REGULATION_OF_TRANSCRIPTION_FROM_RNA_POLYMERASE_II_PROMOTER_INVOLVED_IN_CELLULAR_RESPONSE_TO_CHEMICAL_STIMULUS	GO_POSITIVE_REGULATION_OF_TRANSCRIPTION_FROM_RNA_POLYMERASE_II_PROMOTER_INVOLVED_IN_CELLULAR_RESPONSE_TO_CHEMICAL_STIMULUS		23	-0.319038	-0.85858	0.624463	0.597692	1	4641	tags=22%, list=8%, signal=24%
GO_NEGATIVE_REGULATION_OF_MRNA_SPLICING_VIA_SPLICEOSOME	GO_NEGATIVE_REGULATION_OF_MRNA_SPLICING_VIA_SPLICEOSOME		22	-0.339467	-0.85726	0.623984	0.599497	1	13489	tags=36%, list=24%, signal=48%
GO_PROTEIN_LOCALIZATION_TO_GOLGI_APPARATUS	GO_PROTEIN_LOCALIZATION_TO_GOLGI_APPARATUS		28	-0.307009	-0.85545	0.644309	0.601949	1	11070	tags=32%, list=20%, signal=40%
GO_TRANSCRIPTION_COUPLED_NUCLEOTIDE_EXCISION_REPAIR	GO_TRANSCRIPTION_COUPLED_NUCLEOTIDE_EXCISION_REPAIR		73	-0.27554	-0.855407	0.625483	0.601617	1	12114	tags=29%, list=22%, signal=37%
GO_DNA_DEPENDENT_DNA_REPLICATION_MAINTENANCE_OF_FIDELITY	GO_DNA_DEPENDENT_DNA_REPLICATION_MAINTENANCE_OF_FIDELITY		44	-0.301731	-0.852119	0.610887	0.606531	1	7705	tags=25%, list=14%, signal=29%
GO_HISTONE_H3_K9_METHYLATION	GO_HISTONE_H3_K9_METHYLATION		38	-0.300545	-0.851039	0.625251	0.607876	1	12512	tags=29%, list=23%, signal=37%
GO_REGULATION_OF_HISTONE_H3_K4_METHYLATION	GO_REGULATION_OF_HISTONE_H3_K4_METHYLATION		29	-0.295436	-0.849979	0.624266	0.609197	1	12520	tags=38%, list=23%, signal=49%
GO_HEPARAN_SULFATE_PROTEOGLYCAN_BIOSYNTHETIC_PROCESS	GO_HEPARAN_SULFATE_PROTEOGLYCAN_BIOSYNTHETIC_PROCESS		26	-0.317125	-0.848507	0.654321	0.61113	1	8959	tags=27%, list=16%, signal=32%
GO_NEGATIVE_REGULATION_OF_EXECUTION_PHASE_OF_APOPTOSIS	GO_NEGATIVE_REGULATION_OF_EXECUTION_PHASE_OF_APOPTOSIS		23	-0.325249	-0.846283	0.615694	0.614344	1	18285	tags=65%, list=33%, signal=97%
GO_DETECTION_OF_MECHANICAL_STIMULUS	GO_DETECTION_OF_MECHANICAL_STIMULUS		46	-0.262489	-0.840534	0.7249	0.623363	1	5650	tags=15%, list=10%, signal=17%
GO_REGULATION_OF_CHROMATIN_ASSEMBLY_OR_DISASSEMBLY	GO_REGULATION_OF_CHROMATIN_ASSEMBLY_OR_DISASSEMBLY		26	-0.316978	-0.838985	0.641393	0.625504	1	8054	tags=19%, list=15%, signal=22%
GO_TRANSPOSITION	GO_TRANSPOSITION		29	-0.303273	-0.835534	0.658898	0.630714	1	6931	tags=17%, list=12%, signal=20%
GO_TERMINATION_OF_RNA_POLYMERASE_II_TRANSCRIPTION	GO_TERMINATION_OF_RNA_POLYMERASE_II_TRANSCRIPTION		35	-0.298631	-0.833925	0.657732	0.632942	1	12831	tags=29%, list=23%, signal=37%
GO_SNRNA_PROCESSING	GO_SNRNA_PROCESSING		36	-0.283363	-0.832273	0.64313	0.635187	1	11449	tags=19%, list=21%, signal=24%
GO_MICROTUBULE_NUCLEATION	GO_MICROTUBULE_NUCLEATION		29	-0.298125	-0.832076	0.627016	0.635102	1	7777	tags=17%, list=14%, signal=20%
GO_BLOOD_VESSEL_ENDOTHELIAL_CELL_PROLIFERATION_INVOLVED_IN_SPROUTING_ANGIOGENESIS	GO_BLOOD_VESSEL_ENDOTHELIAL_CELL_PROLIFERATION_INVOLVED_IN_SPROUTING_ANGIOGENESIS		48	-0.25002	-0.831728	0.705179	0.635242	1	2319	tags=8%, list=4%, signal=9%
GO_PYRIMIDINE_NUCLEOSIDE_TRIPHOSPHATE_METABOLIC_PROCESS	GO_PYRIMIDINE_NUCLEOSIDE_TRIPHOSPHATE_METABOLIC_PROCESS		23	-0.293054	-0.830461	0.685484	0.636899	1	7576	tags=22%, list=14%, signal=25%
GO_POSITIVE_REGULATION_OF_COAGULATION	GO_POSITIVE_REGULATION_OF_COAGULATION		29	-0.296144	-0.830228	0.676289	0.636871	1	7163	tags=21%, list=13%, signal=24%
GO_EATING_BEHAVIOR	GO_EATING_BEHAVIOR		33	-0.255927	-0.828914	0.743271	0.638505	1	13055	tags=30%, list=24%, signal=40%
GO_POSITIVE_REGULATION_OF_FATTY_ACID_TRANSPORT	GO_POSITIVE_REGULATION_OF_FATTY_ACID_TRANSPORT		20	-0.288396	-0.82816	0.69899	0.639308	1	7527	tags=15%, list=14%, signal=17%
GO_REGULATION_OF_CELLULAR_AMINE_METABOLIC_PROCESS	GO_REGULATION_OF_CELLULAR_AMINE_METABOLIC_PROCESS		80	-0.273146	-0.82275	0.635081	0.647506	1	8249	tags=20%, list=15%, signal=23%
GO_REGULATION_OF_CALCIUM_ION_IMPORT	GO_REGULATION_OF_CALCIUM_ION_IMPORT		41	-0.269805	-0.822478	0.705765	0.647494	1	6251	tags=17%, list=11%, signal=19%
GO_NEGATIVE_REGULATION_OF_GLUCOSE_TRANSMEMBRANE_TRANSPORT	GO_NEGATIVE_REGULATION_OF_GLUCOSE_TRANSMEMBRANE_TRANSPORT		20	-0.272294	-0.819557	0.730612	0.651639	1	15661	tags=35%, list=28%, signal=49%
GO_POSITIVE_REGULATION_OF_BEHAVIOR	GO_POSITIVE_REGULATION_OF_BEHAVIOR		27	-0.261639	-0.81597	0.770213	0.657147	1	16502	tags=37%, list=30%, signal=53%
GO_DETECTION_OF_VISIBLE_LIGHT	GO_DETECTION_OF_VISIBLE_LIGHT		63	-0.221708	-0.809051	0.794926	0.667914	1	14347	tags=25%, list=26%, signal=34%
GO_INNERVATION	GO_INNERVATION		26	-0.281199	-0.808746	0.724512	0.667937	1	10944	tags=31%, list=20%, signal=38%
GO_NUCLEAR_TRANSCRIBED_MRNA_CATABOLIC_PROCESS_EXONUCLEOLYTIC	GO_NUCLEAR_TRANSCRIBED_MRNA_CATABOLIC_PROCESS_EXONUCLEOLYTIC		35	-0.284679	-0.807444	0.712	0.66962	1	10436	tags=20%, list=19%, signal=25%
GO_REGULATION_OF_CHROMATIN_ASSEMBLY	GO_REGULATION_OF_CHROMATIN_ASSEMBLY		21	-0.326236	-0.805319	0.664609	0.672677	1	2114	tags=10%, list=4%, signal=10%
GO_REGULATION_OF_PROTEIN_POLYUBIQUITINATION	GO_REGULATION_OF_PROTEIN_POLYUBIQUITINATION		26	-0.283621	-0.804195	0.684211	0.674034	1	12401	tags=35%, list=22%, signal=45%
GO_WATER_TRANSPORT	GO_WATER_TRANSPORT		21	-0.288487	-0.80363	0.747881	0.674525	1	9104	tags=24%, list=16%, signal=28%
GO_SENSORY_PERCEPTION_OF_TEMPERATURE_STIMULUS	GO_SENSORY_PERCEPTION_OF_TEMPERATURE_STIMULUS		23	-0.263072	-0.797963	0.759296	0.683251	1	14844	tags=35%, list=27%, signal=47%
GO_MULTICELLULAR_ORGANISMAL_MOVEMENT	GO_MULTICELLULAR_ORGANISMAL_MOVEMENT		55	-0.292518	-0.797935	0.645594	0.682849	1	9175	tags=22%, list=17%, signal=26%
GO_ORGAN_OR_TISSUE_SPECIFIC_IMMUNE_RESPONSE	GO_ORGAN_OR_TISSUE_SPECIFIC_IMMUNE_RESPONSE		41	-0.252539	-0.795084	0.735849	0.686982	1	11900	tags=20%, list=21%, signal=25%
GO_REGULATION_OF_MRNA_PROCESSING	GO_REGULATION_OF_MRNA_PROCESSING		152	-0.256194	-0.792027	0.642715	0.69148	1	13622	tags=32%, list=25%, signal=42%
GO_HISTONE_H3_K4_TRIMETHYLATION	GO_HISTONE_H3_K4_TRIMETHYLATION		21	-0.324743	-0.79025	0.652695	0.693843	1	15415	tags=43%, list=28%, signal=59%
GO_SNRNA_METABOLIC_PROCESS	GO_SNRNA_METABOLIC_PROCESS		47	-0.263456	-0.778759	0.723866	0.712084	1	9761	tags=19%, list=18%, signal=23%
GO_GLUTAMINE_METABOLIC_PROCESS	GO_GLUTAMINE_METABOLIC_PROCESS		23	-0.274099	-0.769826	0.734496	0.725881	1	5119	tags=17%, list=9%, signal=19%
GO_NEGATIVE_REGULATION_OF_STEROL_TRANSPORT	GO_NEGATIVE_REGULATION_OF_STEROL_TRANSPORT		25	-0.262491	-0.769602	0.801961	0.725731	1	4357	tags=8%, list=8%, signal=9%
GO_REGULATION_OF_TRANSCRIPTION_ELONGATION_FROM_RNA_POLYMERASE_II_PROMOTER	GO_REGULATION_OF_TRANSCRIPTION_ELONGATION_FROM_RNA_POLYMERASE_II_PROMOTER		27	-0.279877	-0.765933	0.707171	0.731145	1	1390	tags=7%, list=3%, signal=8%
GO_MYOFIBRIL_ASSEMBLY	GO_MYOFIBRIL_ASSEMBLY		66	-0.303658	-0.762128	0.628742	0.736723	1	10464	tags=29%, list=19%, signal=35%
GO_REGULATION_OF_TRANSCRIPTION_FROM_RNA_POLYMERASE_II_PROMOTER_IN_RESPONSE_TO_HYPOXIA	GO_REGULATION_OF_TRANSCRIPTION_FROM_RNA_POLYMERASE_II_PROMOTER_IN_RESPONSE_TO_HYPOXIA		77	-0.245924	-0.75424	0.728814	0.748721	1	8554	tags=19%, list=15%, signal=23%
GO_REGULATION_OF_MRNA_SPLICING_VIA_SPLICEOSOME	GO_REGULATION_OF_MRNA_SPLICING_VIA_SPLICEOSOME		113	-0.248073	-0.751338	0.703407	0.752709	1	13622	tags=35%, list=25%, signal=46%
GO_NEGATIVE_REGULATION_OF_STEM_CELL_DIFFERENTIATION	GO_NEGATIVE_REGULATION_OF_STEM_CELL_DIFFERENTIATION		21	-0.27632	-0.750508	0.762097	0.753458	1	9559	tags=24%, list=17%, signal=29%
GO_NEGATIVE_REGULATION_OF_GLYCOPROTEIN_METABOLIC_PROCESS	GO_NEGATIVE_REGULATION_OF_GLYCOPROTEIN_METABOLIC_PROCESS		20	-0.262975	-0.74129	0.831301	0.767172	1	15479	tags=35%, list=28%, signal=49%
GO_NEGATIVE_REGULATION_OF_MRNA_PROCESSING	GO_NEGATIVE_REGULATION_OF_MRNA_PROCESSING		31	-0.272194	-0.732881	0.741036	0.77958	1	13489	tags=32%, list=24%, signal=43%
GO_REGULATION_OF_MRNA_3_END_PROCESSING	GO_REGULATION_OF_MRNA_3_END_PROCESSING		28	-0.271409	-0.713065	0.744939	0.808225	1	2893	tags=11%, list=5%, signal=11%
GO_SARCOMERE_ORGANIZATION	GO_SARCOMERE_ORGANIZATION		44	-0.280751	-0.665184	0.709742	0.870024	1	9994	tags=20%, list=18%, signal=25%
GO_NLS_BEARING_PROTEIN_IMPORT_INTO_NUCLEUS	GO_NLS_BEARING_PROTEIN_IMPORT_INTO_NUCLEUS		20	-0.259188	-0.651079	0.868041	0.885783	1	4227	tags=10%, list=8%, signal=11%
GO_REGULATION_OF_CELLULAR_AMINO_ACID_METABOLIC_PROCESS	GO_REGULATION_OF_CELLULAR_AMINO_ACID_METABOLIC_PROCESS		62	-0.231893	-0.635669	0.823887	0.901509	1	17134	tags=39%, list=31%, signal=56%
