# Supplementary material for: Identification of Key Functional Gene Signatures Indicative of Dedifferentiation in Papillary Thyroid Cancer
Source: Front Oncol. 2021 Apr 28;11:641851. doi: 10.3389/fonc.2021.641851 (PMC8113627; doi:10.3389/fonc.2021.641851)
Supplement: Supplementary file 3 [file Table_3.XLSX]

## Sheet: gsea-low
NAME	GS<br> follow link to MSigDB	GS DETAILS	SIZE	ES	NES	NOM p-val	FDR q-val	FWER p-val	RANK AT MAX	LEADING EDGE
GO_MAMMARY_GLAND_EPITHELIAL_CELL_PROLIFERATION	GO_MAMMARY_GLAND_EPITHELIAL_CELL_PROLIFERATION	Details ...	28	0.731203	2.1542	0	0.00399575	0.006	4951	tags=57%, list=9%, signal=63%
GO_SINGLE_STRANDED_VIRAL_RNA_REPLICATION_VIA_DOUBLE_STRANDED_DNA_INTERMEDIATE	GO_SINGLE_STRANDED_VIRAL_RNA_REPLICATION_VIA_DOUBLE_STRANDED_DNA_INTERMEDIATE	Details ...	20	0.808915	2.05637	0	0.0473656	0.066	7112	tags=70%, list=13%, signal=80%
GO_RESPONSE_TO_TYPE_I_INTERFERON	GO_RESPONSE_TO_TYPE_I_INTERFERON	Details ...	98	0.674456	1.99869	0.0019305	0.0872897	0.119	6338	tags=52%, list=11%, signal=59%
GO_REGULATION_OF_SYNCYTIUM_FORMATION_BY_PLASMA_MEMBRANE_FUSION	GO_REGULATION_OF_SYNCYTIUM_FORMATION_BY_PLASMA_MEMBRANE_FUSION	Details ...	30	0.720977	1.9749	0	0.101973	0.15	5828	tags=50%, list=11%, signal=56%
GO_T_CELL_MEDIATED_CYTOTOXICITY	GO_T_CELL_MEDIATED_CYTOTOXICITY	Details ...	44	0.740711	1.96061	0	0.108086	0.181	5889	tags=59%, list=11%, signal=66%
GO_MOVEMENT_IN_HOST_ENVIRONMENT	GO_MOVEMENT_IN_HOST_ENVIRONMENT	Details ...	169	0.553944	1.95418	0.00194175	0.100956	0.196	5889	tags=41%, list=11%, signal=46%
GO_PINOCYTOSIS	GO_PINOCYTOSIS	Details ...	23	0.689216	1.94862	0	0.0949649	0.212	5658	tags=65%, list=10%, signal=73%
GO_RESPONSE_TO_DSRNA	GO_RESPONSE_TO_DSRNA	Details ...	53	0.582728	1.94684	0.00386847	0.0853918	0.214	7322	tags=49%, list=13%, signal=56%
GO_POSITIVE_REGULATION_OF_FIBROBLAST_PROLIFERATION	GO_POSITIVE_REGULATION_OF_FIBROBLAST_PROLIFERATION	Details ...	50	0.589547	1.94555	0	0.0772289	0.217	7567	tags=60%, list=14%, signal=69%
GO_POSITIVE_REGULATION_OF_PROTEIN_TYROSINE_KINASE_ACTIVITY	GO_POSITIVE_REGULATION_OF_PROTEIN_TYROSINE_KINASE_ACTIVITY	Details ...	60	0.583022	1.9437	0	0.0712958	0.222	5519	tags=57%, list=10%, signal=63%
GO_POSITIVE_REGULATION_OF_INTERLEUKIN_6_PRODUCTION	GO_POSITIVE_REGULATION_OF_INTERLEUKIN_6_PRODUCTION	Details ...	85	0.665593	1.9434	0.00202429	0.0652312	0.222	6539	tags=56%, list=12%, signal=64%
GO_ENTRY_INTO_HOST	GO_ENTRY_INTO_HOST	Details ...	147	0.56426	1.93986	0.00386847	0.0624218	0.227	6455	tags=46%, list=12%, signal=51%
GO_RESPONSE_TO_INTERLEUKIN_4	GO_RESPONSE_TO_INTERLEUKIN_4	Details ...	35	0.682831	1.93162	0	0.0686291	0.249	5660	tags=66%, list=10%, signal=73%
GO_T_CELL_ACTIVATION_INVOLVED_IN_IMMUNE_RESPONSE	GO_T_CELL_ACTIVATION_INVOLVED_IN_IMMUNE_RESPONSE	Details ...	108	0.634391	1.93013	0.00204082	0.0651611	0.252	6338	tags=48%, list=11%, signal=54%
GO_POSITIVE_REGULATION_OF_TISSUE_REMODELING	GO_POSITIVE_REGULATION_OF_TISSUE_REMODELING	Details ...	39	0.615321	1.92331	0	0.0671628	0.266	3145	tags=33%, list=6%, signal=35%
GO_PEPTIDE_CROSS_LINKING	GO_PEPTIDE_CROSS_LINKING	Details ...	34	0.673388	1.91835	0.00211416	0.0685578	0.283	7489	tags=65%, list=14%, signal=75%
GO_REGULATION_OF_SUPEROXIDE_ANION_GENERATION	GO_REGULATION_OF_SUPEROXIDE_ANION_GENERATION	Details ...	22	0.715603	1.91662	0.004158	0.0662577	0.286	3884	tags=50%, list=7%, signal=54%
GO_REGULATION_OF_MEMBRANE_PROTEIN_ECTODOMAIN_PROTEOLYSIS	GO_REGULATION_OF_MEMBRANE_PROTEIN_ECTODOMAIN_PROTEOLYSIS	Details ...	23	0.665112	1.91651	0.00198413	0.0626719	0.286	6346	tags=57%, list=11%, signal=64%
GO_B_CELL_APOPTOTIC_PROCESS	GO_B_CELL_APOPTOTIC_PROCESS	Details ...	26	0.690366	1.91179	0	0.063464	0.295	7369	tags=62%, list=13%, signal=71%
GO_T_CELL_MEDIATED_IMMUNITY	GO_T_CELL_MEDIATED_IMMUNITY	Details ...	104	0.611393	1.89445	0	0.0775344	0.335	6694	tags=55%, list=12%, signal=62%
GO_CYTOKINE_METABOLIC_PROCESS	GO_CYTOKINE_METABOLIC_PROCESS	Details ...	72	0.624371	1.89352	0.00197239	0.0750541	0.338	6400	tags=50%, list=12%, signal=56%
GO_TOLL_LIKE_RECEPTOR_3_SIGNALING_PATHWAY	GO_TOLL_LIKE_RECEPTOR_3_SIGNALING_PATHWAY	Details ...	20	0.761058	1.88871	0	0.075813	0.348	5314	tags=75%, list=10%, signal=83%
GO_REGULATION_OF_EXTRINSIC_APOPTOTIC_SIGNALING_PATHWAY_VIA_DEATH_DOMAIN_RECEPTORS	GO_REGULATION_OF_EXTRINSIC_APOPTOTIC_SIGNALING_PATHWAY_VIA_DEATH_DOMAIN_RECEPTORS	Details ...	61	0.574751	1.8854	0	0.07559	0.355	6058	tags=46%, list=11%, signal=51%
GO_INTEGRIN_MEDIATED_SIGNALING_PATHWAY	GO_INTEGRIN_MEDIATED_SIGNALING_PATHWAY	Details ...	108	0.580442	1.88055	0	0.0781933	0.371	4649	tags=48%, list=8%, signal=52%
GO_T_HELPER_1_TYPE_IMMUNE_RESPONSE	GO_T_HELPER_1_TYPE_IMMUNE_RESPONSE	Details ...	44	0.735236	1.87898	0.00204499	0.0767014	0.376	6190	tags=66%, list=11%, signal=74%
GO_INTERLEUKIN_6_PRODUCTION	GO_INTERLEUKIN_6_PRODUCTION	Details ...	159	0.573512	1.86918	0.00982318	0.0834476	0.404	6539	tags=48%, list=12%, signal=54%
GO_POSITIVE_REGULATION_OF_T_HELPER_CELL_DIFFERENTIATION	GO_POSITIVE_REGULATION_OF_T_HELPER_CELL_DIFFERENTIATION	Details ...	21	0.784378	1.86715	0	0.0821167	0.408	6229	tags=71%, list=11%, signal=80%
GO_REGULATION_OF_B_CELL_APOPTOTIC_PROCESS	GO_REGULATION_OF_B_CELL_APOPTOTIC_PROCESS	Details ...	20	0.726261	1.86581	0.00205339	0.0806928	0.414	7369	tags=65%, list=13%, signal=75%
GO_POSITIVE_REGULATION_OF_TUMOR_NECROSIS_FACTOR_SUPERFAMILY_CYTOKINE_PRODUCTION	GO_POSITIVE_REGULATION_OF_TUMOR_NECROSIS_FACTOR_SUPERFAMILY_CYTOKINE_PRODUCTION	Details ...	93	0.601616	1.86006	0.00592885	0.0830595	0.427	6539	tags=51%, list=12%, signal=57%
GO_INTERFERON_GAMMA_MEDIATED_SIGNALING_PATHWAY	GO_INTERFERON_GAMMA_MEDIATED_SIGNALING_PATHWAY	Details ...	89	0.666263	1.85277	0.00782779	0.087115	0.441	6122	tags=63%, list=11%, signal=71%
GO_POSITIVE_REGULATION_OF_CD4_POSITIVE_ALPHA_BETA_T_CELL_DIFFERENTIATION	GO_POSITIVE_REGULATION_OF_CD4_POSITIVE_ALPHA_BETA_T_CELL_DIFFERENTIATION	Details ...	29	0.758736	1.85241	0.00591716	0.0849064	0.442	6229	tags=66%, list=11%, signal=74%
GO_REGULATION_OF_T_HELPER_1_TYPE_IMMUNE_RESPONSE	GO_REGULATION_OF_T_HELPER_1_TYPE_IMMUNE_RESPONSE	Details ...	27	0.789765	1.85132	0.00199601	0.0834194	0.446	6190	tags=74%, list=11%, signal=83%
GO_NEGATIVE_REGULATION_OF_EXTRINSIC_APOPTOTIC_SIGNALING_PATHWAY	GO_NEGATIVE_REGULATION_OF_EXTRINSIC_APOPTOTIC_SIGNALING_PATHWAY	Details ...	106	0.519342	1.84236	0.00194175	0.0897194	0.471	6346	tags=43%, list=11%, signal=49%
GO_DENDRITIC_CELL_DIFFERENTIATION	GO_DENDRITIC_CELL_DIFFERENTIATION	Details ...	43	0.691394	1.83888	0.00414938	0.0914982	0.484	5199	tags=56%, list=9%, signal=62%
GO_MEMBRANE_PROTEIN_ECTODOMAIN_PROTEOLYSIS	GO_MEMBRANE_PROTEIN_ECTODOMAIN_PROTEOLYSIS	Details ...	42	0.592144	1.83834	0.0059761	0.0893715	0.485	6346	tags=55%, list=11%, signal=62%
GO_APOPTOTIC_CELL_CLEARANCE	GO_APOPTOTIC_CELL_CLEARANCE	Details ...	51	0.579652	1.83383	0.00400802	0.0922169	0.499	5154	tags=55%, list=9%, signal=60%
GO_NEGATIVE_REGULATION_OF_CELL_MORPHOGENESIS_INVOLVED_IN_DIFFERENTIATION	GO_NEGATIVE_REGULATION_OF_CELL_MORPHOGENESIS_INVOLVED_IN_DIFFERENTIATION	Details ...	98	0.530352	1.83277	0	0.0910799	0.503	5730	tags=45%, list=10%, signal=50%
GO_NEGATIVE_REGULATION_OF_CELL_KILLING	GO_NEGATIVE_REGULATION_OF_CELL_KILLING	Details ...	24	0.782518	1.82751	0.00205339	0.0945231	0.508	7963	tags=79%, list=14%, signal=92%
GO_COLLAGEN_CATABOLIC_PROCESS	GO_COLLAGEN_CATABOLIC_PROCESS	Details ...	47	0.602299	1.82665	0.00399202	0.0929818	0.51	6188	tags=62%, list=11%, signal=69%
GO_RESPONSE_TO_INTERLEUKIN_12	GO_RESPONSE_TO_INTERLEUKIN_12	Details ...	50	0.605506	1.82177	0.012024	0.0956895	0.521	7762	tags=54%, list=14%, signal=63%
GO_POSITIVE_REGULATION_OF_DNA_REPLICATION	GO_POSITIVE_REGULATION_OF_DNA_REPLICATION	Details ...	40	0.570442	1.81738	0.00591716	0.0988508	0.538	6395	tags=52%, list=12%, signal=59%
GO_POSITIVE_REGULATION_OF_T_HELPER_1_TYPE_IMMUNE_RESPONSE	GO_POSITIVE_REGULATION_OF_T_HELPER_1_TYPE_IMMUNE_RESPONSE	Details ...	20	0.790387	1.81547	0	0.0987897	0.543	6190	tags=75%, list=11%, signal=84%
GO_POSITIVE_REGULATION_OF_FILOPODIUM_ASSEMBLY	GO_POSITIVE_REGULATION_OF_FILOPODIUM_ASSEMBLY	Details ...	30	0.595559	1.81299	0.00208333	0.0993741	0.551	4649	tags=53%, list=8%, signal=58%
GO_REGULATION_OF_NITRIC_OXIDE_BIOSYNTHETIC_PROCESS	GO_REGULATION_OF_NITRIC_OXIDE_BIOSYNTHETIC_PROCESS	Details ...	66	0.553015	1.8125	0.00784314	0.0976942	0.551	6346	tags=42%, list=11%, signal=48%
GO_INTERLEUKIN_17_PRODUCTION	GO_INTERLEUKIN_17_PRODUCTION	Details ...	43	0.594657	1.81079	0.0060241	0.0973103	0.556	4877	tags=42%, list=9%, signal=46%
GO_POSITIVE_REGULATION_OF_INTERLEUKIN_1_PRODUCTION	GO_POSITIVE_REGULATION_OF_INTERLEUKIN_1_PRODUCTION	Details ...	59	0.631506	1.81033	0.016	0.0956965	0.556	6346	tags=58%, list=11%, signal=65%
GO_CALCIUM_INDEPENDENT_CELL_CELL_ADHESION_VIA_PLASMA_MEMBRANE_CELL_ADHESION_MOLECULES	GO_CALCIUM_INDEPENDENT_CELL_CELL_ADHESION_VIA_PLASMA_MEMBRANE_CELL_ADHESION_MOLECULES	Details ...	23	0.623612	1.80712	0.00573614	0.0973831	0.564	5824	tags=57%, list=10%, signal=63%
GO_REGULATION_OF_MACROPHAGE_MIGRATION	GO_REGULATION_OF_MACROPHAGE_MIGRATION	Details ...	42	0.596461	1.80576	0.00808081	0.0968929	0.567	5058	tags=45%, list=9%, signal=50%
GO_INTERLEUKIN_8_PRODUCTION	GO_INTERLEUKIN_8_PRODUCTION	Details ...	99	0.540768	1.80431	0.00592885	0.0964374	0.572	6443	tags=40%, list=12%, signal=46%
GO_REGULATION_OF_T_CELL_MEDIATED_CYTOTOXICITY	GO_REGULATION_OF_T_CELL_MEDIATED_CYTOTOXICITY	Details ...	35	0.705706	1.80208	0.006	0.0973407	0.577	5889	tags=60%, list=11%, signal=67%
GO_REGULATION_OF_EXTRINSIC_APOPTOTIC_SIGNALING_PATHWAY	GO_REGULATION_OF_EXTRINSIC_APOPTOTIC_SIGNALING_PATHWAY	Details ...	160	0.486648	1.8013	0.00193798	0.0960864	0.58	6346	tags=43%, list=11%, signal=48%
GO_ACTIVATION_OF_JUN_KINASE_ACTIVITY	GO_ACTIVATION_OF_JUN_KINASE_ACTIVITY	Details ...	40	0.580057	1.8013	0.00389864	0.0942386	0.58	4671	tags=38%, list=8%, signal=41%
GO_INTERLEUKIN_1_PRODUCTION	GO_INTERLEUKIN_1_PRODUCTION	Details ...	118	0.565681	1.80006	0.0137795	0.0936963	0.584	6346	tags=47%, list=11%, signal=53%
GO_REGULATION_OF_MYOBLAST_FUSION	GO_REGULATION_OF_MYOBLAST_FUSION	Details ...	22	0.709577	1.79972	0.00410678	0.0922494	0.586	7800	tags=59%, list=14%, signal=69%
GO_EXTRACELLULAR_MATRIX_DISASSEMBLY	GO_EXTRACELLULAR_MATRIX_DISASSEMBLY	Details ...	82	0.525648	1.79948	0	0.0907704	0.587	5198	tags=49%, list=9%, signal=54%
GO_LEUKOCYTE_MEDIATED_CYTOTOXICITY	GO_LEUKOCYTE_MEDIATED_CYTOTOXICITY	Details ...	108	0.625861	1.79694	0.010101	0.0915624	0.597	6003	tags=49%, list=11%, signal=55%
GO_REGULATION_OF_PROTEIN_TYROSINE_KINASE_ACTIVITY	GO_REGULATION_OF_PROTEIN_TYROSINE_KINASE_ACTIVITY	Details ...	93	0.508401	1.79254	0.00198413	0.0939811	0.605	5519	tags=48%, list=10%, signal=54%
GO_POSITIVE_REGULATION_OF_AMYLOID_PRECURSOR_PROTEIN_CATABOLIC_PROCESS	GO_POSITIVE_REGULATION_OF_AMYLOID_PRECURSOR_PROTEIN_CATABOLIC_PROCESS	Details ...	24	0.622492	1.79156	0.00978474	0.0931694	0.605	6346	tags=54%, list=11%, signal=61%
GO_REGULATION_OF_WATER_LOSS_VIA_SKIN	GO_REGULATION_OF_WATER_LOSS_VIA_SKIN	Details ...	28	0.599575	1.78834	0	0.0948335	0.611	1211	tags=36%, list=2%, signal=36%
GO_CYTOKINETIC_PROCESS	GO_CYTOKINETIC_PROCESS	Details ...	39	0.595132	1.78758	0.00831601	0.0940823	0.613	6170	tags=49%, list=11%, signal=55%
GO_POSITIVE_REGULATION_OF_PROTEIN_MATURATION	GO_POSITIVE_REGULATION_OF_PROTEIN_MATURATION	Details ...	27	0.57431	1.78728	0.00594059	0.0928375	0.614	3862	tags=52%, list=7%, signal=56%
GO_MEMBRANE_PROTEIN_PROTEOLYSIS	GO_MEMBRANE_PROTEIN_PROTEOLYSIS	Details ...	61	0.533464	1.78667	0.016	0.092054	0.617	6756	tags=51%, list=12%, signal=58%
GO_OVULATION	GO_OVULATION	Details ...	21	0.668127	1.78558	0.00198807	0.09164	0.621	6511	tags=52%, list=12%, signal=59%
GO_POSITIVE_REGULATION_OF_T_CELL_MEDIATED_IMMUNITY	GO_POSITIVE_REGULATION_OF_T_CELL_MEDIATED_IMMUNITY	Details ...	50	0.631572	1.78395	0.0118812	0.091767	0.623	7696	tags=62%, list=14%, signal=72%
GO_EOSINOPHIL_MIGRATION	GO_EOSINOPHIL_MIGRATION	Details ...	22	0.742448	1.78393	0.00205339	0.0903745	0.623	5396	tags=55%, list=10%, signal=60%
GO_IMMUNE_RESPONSE_TO_TUMOR_CELL	GO_IMMUNE_RESPONSE_TO_TUMOR_CELL	Details ...	20	0.658545	1.78387	0.0094162	0.089112	0.623	8936	tags=50%, list=16%, signal=60%
GO_COCHLEA_MORPHOGENESIS	GO_COCHLEA_MORPHOGENESIS	Details ...	24	0.615726	1.78311	0.00801603	0.0884855	0.625	6257	tags=50%, list=11%, signal=56%
GO_HETEROTYPIC_CELL_CELL_ADHESION	GO_HETEROTYPIC_CELL_CELL_ADHESION	Details ...	62	0.572523	1.78211	0.00404858	0.088391	0.629	6443	tags=53%, list=12%, signal=60%
GO_UTERUS_DEVELOPMENT	GO_UTERUS_DEVELOPMENT	Details ...	21	0.7288	1.77943	0.0038835	0.0897685	0.636	5342	tags=48%, list=10%, signal=53%
GO_REGULATION_OF_LYMPHOCYTE_CHEMOTAXIS	GO_REGULATION_OF_LYMPHOCYTE_CHEMOTAXIS	Details ...	27	0.724105	1.7757	0.0119522	0.0921066	0.646	10222	tags=59%, list=18%, signal=73%
GO_POSITIVE_REGULATION_OF_T_CELL_MEDIATED_CYTOTOXICITY	GO_POSITIVE_REGULATION_OF_T_CELL_MEDIATED_CYTOTOXICITY	Details ...	28	0.709868	1.77523	0.00994036	0.0912976	0.648	5889	tags=61%, list=11%, signal=68%
GO_REGULATION_OF_NEUROINFLAMMATORY_RESPONSE	GO_REGULATION_OF_NEUROINFLAMMATORY_RESPONSE	Details ...	41	0.607479	1.77096	0.0140562	0.0945246	0.658	7696	tags=54%, list=14%, signal=62%
GO_RESPONSE_TO_OSMOTIC_STRESS	GO_RESPONSE_TO_OSMOTIC_STRESS	Details ...	85	0.486513	1.7708	0.00582524	0.0933515	0.658	3734	tags=36%, list=7%, signal=39%
GO_CELL_KILLING	GO_CELL_KILLING	Details ...	172	0.555729	1.77044	0.0100806	0.0924593	0.659	8173	tags=45%, list=15%, signal=52%
GO_REGULATION_OF_FILOPODIUM_ASSEMBLY	GO_REGULATION_OF_FILOPODIUM_ASSEMBLY	Details ...	46	0.53459	1.77025	0.00817996	0.0914485	0.66	5199	tags=50%, list=9%, signal=55%
GO_CELLULAR_RESPONSE_TO_DSRNA	GO_CELLULAR_RESPONSE_TO_DSRNA	Details ...	22	0.636029	1.76938	0.0192678	0.0910046	0.661	6756	tags=64%, list=12%, signal=72%
GO_LYMPHOCYTE_CHEMOTAXIS	GO_LYMPHOCYTE_CHEMOTAXIS	Details ...	63	0.661319	1.76892	0.0139721	0.0901945	0.662	6190	tags=49%, list=11%, signal=55%
GO_RECEPTOR_SIGNALING_PATHWAY_VIA_STAT	GO_RECEPTOR_SIGNALING_PATHWAY_VIA_STAT	Details ...	168	0.496427	1.76853	0.00787402	0.0894451	0.664	7890	tags=44%, list=14%, signal=51%
GO_T_CELL_DIFFERENTIATION_INVOLVED_IN_IMMUNE_RESPONSE	GO_T_CELL_DIFFERENTIATION_INVOLVED_IN_IMMUNE_RESPONSE	Details ...	70	0.632799	1.7681	0.0122951	0.0886773	0.666	5763	tags=50%, list=10%, signal=56%
GO_ALPHA_BETA_T_CELL_ACTIVATION_INVOLVED_IN_IMMUNE_RESPONSE	GO_ALPHA_BETA_T_CELL_ACTIVATION_INVOLVED_IN_IMMUNE_RESPONSE	Details ...	62	0.643918	1.76586	0.0103093	0.0895287	0.674	6229	tags=52%, list=11%, signal=58%
GO_TYROSINE_PHOSPHORYLATION_OF_STAT_PROTEIN	GO_TYROSINE_PHOSPHORYLATION_OF_STAT_PROTEIN	Details ...	85	0.534335	1.76432	0.00769231	0.0898665	0.678	8065	tags=48%, list=15%, signal=56%
GO_T_CELL_MIGRATION	GO_T_CELL_MIGRATION	Details ...	67	0.648762	1.76335	0.00998004	0.0896673	0.679	6556	tags=45%, list=12%, signal=51%
GO_POSITIVE_REGULATION_OF_INTERLEUKIN_8_PRODUCTION	GO_POSITIVE_REGULATION_OF_INTERLEUKIN_8_PRODUCTION	Details ...	54	0.576952	1.76216	0.0177866	0.089894	0.68	6443	tags=50%, list=12%, signal=57%
GO_REGULATION_OF_T_HELPER_CELL_DIFFERENTIATION	GO_REGULATION_OF_T_HELPER_CELL_DIFFERENTIATION	Details ...	35	0.685341	1.76136	0.0139721	0.0896555	0.684	6839	tags=63%, list=12%, signal=72%
GO_AXON_EXTENSION	GO_AXON_EXTENSION	Details ...	123	0.523061	1.76101	0.0100402	0.0888967	0.684	4892	tags=37%, list=9%, signal=40%
GO_NEGATIVE_REGULATION_OF_VIRAL_LIFE_CYCLE	GO_NEGATIVE_REGULATION_OF_VIRAL_LIFE_CYCLE	Details ...	86	0.565348	1.7602	0.01341	0.0888714	0.685	7279	tags=49%, list=13%, signal=56%
GO_REGULATORY_T_CELL_DIFFERENTIATION	GO_REGULATORY_T_CELL_DIFFERENTIATION	Details ...	34	0.696808	1.75714	0.0139442	0.0902982	0.694	6839	tags=65%, list=12%, signal=74%
GO_POSITIVE_REGULATION_OF_CYTOKINE_PRODUCTION_INVOLVED_IN_IMMUNE_RESPONSE	GO_POSITIVE_REGULATION_OF_CYTOKINE_PRODUCTION_INVOLVED_IN_IMMUNE_RESPONSE	Details ...	55	0.607898	1.75627	0.0176817	0.0900965	0.697	6539	tags=56%, list=12%, signal=64%
GO_DENDRITIC_SPINE_MAINTENANCE	GO_DENDRITIC_SPINE_MAINTENANCE	Details ...	20	0.634937	1.75531	0.00414079	0.0902065	0.7	5812	tags=55%, list=10%, signal=61%
GO_NEGATIVE_REGULATION_OF_CD4_POSITIVE_ALPHA_BETA_T_CELL_ACTIVATION	GO_NEGATIVE_REGULATION_OF_CD4_POSITIVE_ALPHA_BETA_T_CELL_ACTIVATION	Details ...	31	0.637614	1.75364	0.0162272	0.0907379	0.703	4431	tags=45%, list=8%, signal=49%
GO_REGULATION_OF_MACROPHAGE_CHEMOTAXIS	GO_REGULATION_OF_MACROPHAGE_CHEMOTAXIS	Details ...	30	0.580897	1.75317	0.0102041	0.0901195	0.703	5058	tags=43%, list=9%, signal=48%
GO_EPHRIN_RECEPTOR_SIGNALING_PATHWAY	GO_EPHRIN_RECEPTOR_SIGNALING_PATHWAY	Details ...	87	0.505128	1.75029	0.014	0.0918333	0.708	5520	tags=44%, list=10%, signal=48%
GO_POSITIVE_REGULATION_OF_NITRIC_OXIDE_METABOLIC_PROCESS	GO_POSITIVE_REGULATION_OF_NITRIC_OXIDE_METABOLIC_PROCESS	Details ...	46	0.553491	1.74724	0.00980392	0.0935818	0.715	6346	tags=39%, list=11%, signal=44%
GO_POSITIVE_REGULATION_OF_PEPTIDYL_TYROSINE_PHOSPHORYLATION	GO_POSITIVE_REGULATION_OF_PEPTIDYL_TYROSINE_PHOSPHORYLATION	Details ...	192	0.477576	1.74625	0.00395257	0.0935507	0.717	4895	tags=36%, list=9%, signal=40%
GO_CELL_CYCLE_DNA_REPLICATION	GO_CELL_CYCLE_DNA_REPLICATION	Details ...	65	0.627267	1.74618	0.0331384	0.0926266	0.717	6588	tags=57%, list=12%, signal=65%
GO_NEGATIVE_REGULATION_OF_INTERFERON_GAMMA_PRODUCTION	GO_NEGATIVE_REGULATION_OF_INTERFERON_GAMMA_PRODUCTION	Details ...	36	0.616317	1.74598	0.0119522	0.0918442	0.717	4431	tags=47%, list=8%, signal=51%
GO_ANTIGEN_PROCESSING_AND_PRESENTATION_OF_ENDOGENOUS_ANTIGEN	GO_ANTIGEN_PROCESSING_AND_PRESENTATION_OF_ENDOGENOUS_ANTIGEN	Details ...	24	0.745219	1.7435	0.018	0.0932414	0.727	6125	tags=75%, list=11%, signal=84%
GO_NEGATIVE_REGULATION_OF_ENDOCYTOSIS	GO_NEGATIVE_REGULATION_OF_ENDOCYTOSIS	Details ...	48	0.497483	1.74222	0.00200803	0.0936003	0.729	5894	tags=44%, list=11%, signal=49%
GO_POSITIVE_REGULATION_OF_RESPONSE_TO_CYTOKINE_STIMULUS	GO_POSITIVE_REGULATION_OF_RESPONSE_TO_CYTOKINE_STIMULUS	Details ...	57	0.577919	1.74047	0.0116959	0.0943761	0.731	6322	tags=49%, list=11%, signal=55%
GO_NEUROINFLAMMATORY_RESPONSE	GO_NEUROINFLAMMATORY_RESPONSE	Details ...	75	0.569071	1.73808	0.0178571	0.0955464	0.734	8815	tags=60%, list=16%, signal=71%
GO_REGULATION_OF_MICROGLIAL_CELL_ACTIVATION	GO_REGULATION_OF_MICROGLIAL_CELL_ACTIVATION	Details ...	20	0.677549	1.73696	0.0202429	0.0957594	0.738	10804	tags=75%, list=19%, signal=93%
GO_NEGATIVE_REGULATION_OF_LEUKOCYTE_MEDIATED_CYTOTOXICITY	GO_NEGATIVE_REGULATION_OF_LEUKOCYTE_MEDIATED_CYTOTOXICITY	Details ...	20	0.798944	1.73696	0.00819672	0.0948206	0.738	7963	tags=85%, list=14%, signal=99%
GO_FIBROBLAST_PROLIFERATION	GO_FIBROBLAST_PROLIFERATION	Details ...	83	0.481249	1.73653	0.00394477	0.0943276	0.74	5868	tags=42%, list=11%, signal=47%
GO_POSITIVE_REGULATION_OF_TOLL_LIKE_RECEPTOR_SIGNALING_PATHWAY	GO_POSITIVE_REGULATION_OF_TOLL_LIKE_RECEPTOR_SIGNALING_PATHWAY	Details ...	24	0.643489	1.73334	0.0117188	0.0964761	0.742	5959	tags=58%, list=11%, signal=65%
GO_POSITIVE_REGULATION_OF_LYMPHOCYTE_CHEMOTAXIS	GO_POSITIVE_REGULATION_OF_LYMPHOCYTE_CHEMOTAXIS	Details ...	21	0.70345	1.73078	0.0238569	0.0978078	0.745	10222	tags=57%, list=18%, signal=70%
GO_TUMOR_NECROSIS_FACTOR_SUPERFAMILY_CYTOKINE_PRODUCTION	GO_TUMOR_NECROSIS_FACTOR_SUPERFAMILY_CYTOKINE_PRODUCTION	Details ...	180	0.50744	1.72943	0.0213592	0.0981754	0.747	6539	tags=41%, list=12%, signal=46%
GO_POSITIVE_REGULATION_OF_I_KAPPAB_KINASE_NF_KAPPAB_SIGNALING	GO_POSITIVE_REGULATION_OF_I_KAPPAB_KINASE_NF_KAPPAB_SIGNALING	Details ...	188	0.5016	1.72857	0.0205993	0.0981628	0.748	6177	tags=45%, list=11%, signal=51%
GO_NEGATIVE_REGULATION_OF_VIRAL_PROCESS	GO_NEGATIVE_REGULATION_OF_VIRAL_PROCESS	Details ...	104	0.536752	1.72787	0.0135659	0.0978392	0.748	7464	tags=46%, list=13%, signal=53%
GO_POSITIVE_REGULATION_OF_PEPTIDASE_ACTIVITY	GO_POSITIVE_REGULATION_OF_PEPTIDASE_ACTIVITY	Details ...	193	0.453602	1.7276	0.00784314	0.0971988	0.748	6387	tags=42%, list=12%, signal=47%
GO_POSITIVE_REGULATION_OF_CYTOKINE_BIOSYNTHETIC_PROCESS	GO_POSITIVE_REGULATION_OF_CYTOKINE_BIOSYNTHETIC_PROCESS	Details ...	37	0.640344	1.72677	0.0316206	0.0971477	0.748	6346	tags=59%, list=11%, signal=67%
GO_REGULATION_OF_CD4_POSITIVE_ALPHA_BETA_T_CELL_DIFFERENTIATION	GO_REGULATION_OF_CD4_POSITIVE_ALPHA_BETA_T_CELL_DIFFERENTIATION	Details ...	47	0.662447	1.7251	0.0160643	0.0977802	0.748	6229	tags=57%, list=11%, signal=65%
GO_RESPONSE_TO_INTERFERON_GAMMA	GO_RESPONSE_TO_INTERFERON_GAMMA	Details ...	198	0.56196	1.72504	0.0291829	0.0969653	0.748	6122	tags=54%, list=11%, signal=60%
GO_NEGATIVE_REGULATION_OF_LEUKOCYTE_CELL_CELL_ADHESION	GO_NEGATIVE_REGULATION_OF_LEUKOCYTE_CELL_CELL_ADHESION	Details ...	135	0.528823	1.72498	0.0177165	0.0961617	0.748	6437	tags=47%, list=12%, signal=53%
GO_POSITIVE_REGULATION_OF_CHEMOKINE_PRODUCTION	GO_POSITIVE_REGULATION_OF_CHEMOKINE_PRODUCTION	Details ...	59	0.56875	1.7238	0.0217822	0.0965518	0.752	8955	tags=58%, list=16%, signal=69%
GO_NEGATIVE_REGULATION_OF_EXTRINSIC_APOPTOTIC_SIGNALING_PATHWAY_VIA_DEATH_DOMAIN_RECEPTORS	GO_NEGATIVE_REGULATION_OF_EXTRINSIC_APOPTOTIC_SIGNALING_PATHWAY_VIA_DEATH_DOMAIN_RECEPTORS	Details ...	41	0.560389	1.72327	0.00579151	0.0962945	0.754	6058	tags=46%, list=11%, signal=52%
GO_NEGATIVE_REGULATION_OF_AXONOGENESIS	GO_NEGATIVE_REGULATION_OF_AXONOGENESIS	Details ...	70	0.516464	1.72325	0.00196464	0.0954695	0.754	6100	tags=41%, list=11%, signal=46%
GO_NEGATIVE_REGULATION_OF_LYMPHOCYTE_ACTIVATION	GO_NEGATIVE_REGULATION_OF_LYMPHOCYTE_ACTIVATION	Details ...	153	0.538876	1.72297	0.0241449	0.0949212	0.755	6565	tags=50%, list=12%, signal=57%
GO_REGULATION_OF_TYPE_I_INTERFERON_MEDIATED_SIGNALING_PATHWAY	GO_REGULATION_OF_TYPE_I_INTERFERON_MEDIATED_SIGNALING_PATHWAY	Details ...	34	0.622148	1.72233	0.0234375	0.0946794	0.757	8102	tags=53%, list=15%, signal=62%
GO_RESPONSE_TO_X_RAY	GO_RESPONSE_TO_X_RAY	Details ...	32	0.611473	1.72218	0.0124224	0.093966	0.758	5106	tags=53%, list=9%, signal=58%
GO_INTERLEUKIN_13_PRODUCTION	GO_INTERLEUKIN_13_PRODUCTION	Details ...	21	0.625409	1.72202	0.0140845	0.0933485	0.76	5248	tags=52%, list=9%, signal=58%
GO_REGULATION_OF_RECEPTOR_SIGNALING_PATHWAY_VIA_STAT	GO_REGULATION_OF_RECEPTOR_SIGNALING_PATHWAY_VIA_STAT	Details ...	145	0.478292	1.72148	0.00982318	0.0930685	0.76	8065	tags=44%, list=15%, signal=52%
GO_INTRINSIC_APOPTOTIC_SIGNALING_PATHWAY_IN_RESPONSE_TO_DNA_DAMAGE_BY_P53_CLASS_MEDIATOR	GO_INTRINSIC_APOPTOTIC_SIGNALING_PATHWAY_IN_RESPONSE_TO_DNA_DAMAGE_BY_P53_CLASS_MEDIATOR	Details ...	45	0.525503	1.71913	0.015748	0.0941189	0.761	5025	tags=49%, list=9%, signal=54%
GO_NEGATIVE_REGULATION_OF_NERVOUS_SYSTEM_PROCESS	GO_NEGATIVE_REGULATION_OF_NERVOUS_SYSTEM_PROCESS	Details ...	28	0.556264	1.71874	0.00588235	0.0937519	0.763	8393	tags=61%, list=15%, signal=72%
GO_POSITIVE_REGULATION_OF_ALPHA_BETA_T_CELL_DIFFERENTIATION	GO_POSITIVE_REGULATION_OF_ALPHA_BETA_T_CELL_DIFFERENTIATION	Details ...	46	0.620271	1.71767	0.0259481	0.0939094	0.763	6229	tags=50%, list=11%, signal=56%
GO_T_CELL_CHEMOTAXIS	GO_T_CELL_CHEMOTAXIS	Details ...	28	0.708971	1.71614	0.0300601	0.0945863	0.767	10570	tags=57%, list=19%, signal=71%
GO_POSITIVE_REGULATION_OF_PROTEIN_KINASE_B_SIGNALING	GO_POSITIVE_REGULATION_OF_PROTEIN_KINASE_B_SIGNALING	Details ...	175	0.466831	1.71568	0.00792079	0.094307	0.768	7174	tags=43%, list=13%, signal=50%
GO_SEMAPHORIN_PLEXIN_SIGNALING_PATHWAY	GO_SEMAPHORIN_PLEXIN_SIGNALING_PATHWAY	Details ...	40	0.564249	1.71342	0.0159681	0.095584	0.774	6236	tags=52%, list=11%, signal=59%
GO_REGULATION_OF_CELL_AGING	GO_REGULATION_OF_CELL_AGING	Details ...	54	0.514535	1.71324	0.00582524	0.0949861	0.774	7418	tags=52%, list=13%, signal=60%
GO_CELLULAR_DEFENSE_RESPONSE	GO_CELLULAR_DEFENSE_RESPONSE	Details ...	53	0.653284	1.71264	0.0257937	0.094697	0.774	8909	tags=60%, list=16%, signal=72%
GO_INTERLEUKIN_10_PRODUCTION	GO_INTERLEUKIN_10_PRODUCTION	Details ...	61	0.599584	1.71223	0.0258449	0.0942787	0.776	8878	tags=61%, list=16%, signal=72%
GO_POSITIVE_REGULATION_OF_PLASMA_MEMBRANE_BOUNDED_CELL_PROJECTION_ASSEMBLY	GO_POSITIVE_REGULATION_OF_PLASMA_MEMBRANE_BOUNDED_CELL_PROJECTION_ASSEMBLY	Details ...	104	0.47277	1.7113	0.0116279	0.0944125	0.778	4649	tags=41%, list=8%, signal=45%
GO_NEGATIVE_REGULATION_OF_INNATE_IMMUNE_RESPONSE	GO_NEGATIVE_REGULATION_OF_INNATE_IMMUNE_RESPONSE	Details ...	61	0.5956	1.71048	0.0177515	0.0945075	0.781	7963	tags=56%, list=14%, signal=65%
GO_REGULATION_OF_CYTOKINE_PRODUCTION_INVOLVED_IN_IMMUNE_RESPONSE	GO_REGULATION_OF_CYTOKINE_PRODUCTION_INVOLVED_IN_IMMUNE_RESPONSE	Details ...	83	0.564969	1.70958	0.0255403	0.0945863	0.783	6539	tags=54%, list=12%, signal=61%
GO_CELLULAR_COMPONENT_MAINTENANCE	GO_CELLULAR_COMPONENT_MAINTENANCE	Details ...	61	0.496525	1.70904	0.00589391	0.0943049	0.783	6084	tags=49%, list=11%, signal=55%
GO_POSITIVE_REGULATION_OF_PROTEIN_LOCALIZATION_TO_NUCLEUS	GO_POSITIVE_REGULATION_OF_PROTEIN_LOCALIZATION_TO_NUCLEUS	Details ...	79	0.504467	1.70711	0.0142276	0.0952004	0.787	7006	tags=46%, list=13%, signal=52%
GO_POSITIVE_REGULATION_OF_TYROSINE_PHOSPHORYLATION_OF_STAT_PROTEIN	GO_POSITIVE_REGULATION_OF_TYROSINE_PHOSPHORYLATION_OF_STAT_PROTEIN	Details ...	68	0.538157	1.70598	0.0191571	0.0954363	0.789	8065	tags=51%, list=15%, signal=60%
GO_CHEMOKINE_PRODUCTION	GO_CHEMOKINE_PRODUCTION	Details ...	92	0.525717	1.7013	0.0240964	0.0988575	0.792	8955	tags=54%, list=16%, signal=65%
GO_EXTRINSIC_APOPTOTIC_SIGNALING_PATHWAY_VIA_DEATH_DOMAIN_RECEPTORS	GO_EXTRINSIC_APOPTOTIC_SIGNALING_PATHWAY_VIA_DEATH_DOMAIN_RECEPTORS	Details ...	89	0.474875	1.70075	0.00772201	0.09863	0.793	6346	tags=43%, list=11%, signal=48%
GO_NEGATIVE_REGULATION_OF_VIRAL_GENOME_REPLICATION	GO_NEGATIVE_REGULATION_OF_VIRAL_GENOME_REPLICATION	Details ...	61	0.585115	1.70012	0.0191939	0.0984407	0.793	7279	tags=54%, list=13%, signal=62%
GO_NEGATIVE_REGULATION_OF_AXON_EXTENSION	GO_NEGATIVE_REGULATION_OF_AXON_EXTENSION	Details ...	43	0.53105	1.69861	0.00194175	0.0992002	0.795	5308	tags=42%, list=10%, signal=46%
GO_POSITIVE_REGULATION_OF_LYMPHOCYTE_DIFFERENTIATION	GO_POSITIVE_REGULATION_OF_LYMPHOCYTE_DIFFERENTIATION	Details ...	104	0.570261	1.69688	0.023622	0.0999531	0.796	8219	tags=56%, list=15%, signal=65%
GO_REGULATION_OF_METALLOPEPTIDASE_ACTIVITY	GO_REGULATION_OF_METALLOPEPTIDASE_ACTIVITY	Details ...	22	0.568739	1.69666	0.0124224	0.0993724	0.796	2343	tags=36%, list=4%, signal=38%
GO_REGULATION_OF_EXTENT_OF_CELL_GROWTH	GO_REGULATION_OF_EXTENT_OF_CELL_GROWTH	Details ...	111	0.482477	1.69651	0.00996016	0.0987657	0.796	6426	tags=41%, list=12%, signal=46%
GO_NEGATIVE_REGULATION_OF_INTERLEUKIN_8_PRODUCTION	GO_NEGATIVE_REGULATION_OF_INTERLEUKIN_8_PRODUCTION	Details ...	35	0.551222	1.69631	0.0200401	0.0983088	0.797	5411	tags=31%, list=10%, signal=35%
GO_DNA_REPLICATION_INITIATION	GO_DNA_REPLICATION_INITIATION	Details ...	39	0.650044	1.69605	0.0360721	0.0978637	0.797	6464	tags=59%, list=12%, signal=67%
GO_POSITIVE_REGULATION_OF_ADAPTIVE_IMMUNE_RESPONSE	GO_POSITIVE_REGULATION_OF_ADAPTIVE_IMMUNE_RESPONSE	Details ...	109	0.549926	1.69408	0.0333333	0.0990912	0.798	7378	tags=55%, list=13%, signal=63%
GO_RESPONSE_TO_ANGIOTENSIN	GO_RESPONSE_TO_ANGIOTENSIN	Details ...	27	0.585993	1.69377	0.004	0.0986074	0.798	7567	tags=52%, list=14%, signal=60%
GO_CD4_POSITIVE_ALPHA_BETA_T_CELL_DIFFERENTIATION	GO_CD4_POSITIVE_ALPHA_BETA_T_CELL_DIFFERENTIATION	Details ...	77	0.601072	1.69334	0.0264228	0.0983442	0.799	5763	tags=47%, list=10%, signal=52%
GO_RESPONSE_TO_INTERFERON_ALPHA	GO_RESPONSE_TO_INTERFERON_ALPHA	Details ...	21	0.708002	1.6907	0.0115385	0.100224	0.806	5394	tags=48%, list=10%, signal=53%
GO_REGULATION_OF_TISSUE_REMODELING	GO_REGULATION_OF_TISSUE_REMODELING	Details ...	83	0.481032	1.69068	0.011583	0.0995562	0.806	5565	tags=35%, list=10%, signal=39%
GO_T_CELL_PROLIFERATION	GO_T_CELL_PROLIFERATION		194	0.5426	1.69059	0.0262097	0.0989657	0.807	7378	tags=56%, list=13%, signal=64%
GO_REGULATION_OF_TOLL_LIKE_RECEPTOR_SIGNALING_PATHWAY	GO_REGULATION_OF_TOLL_LIKE_RECEPTOR_SIGNALING_PATHWAY		71	0.541271	1.69049	0.0268714	0.0983992	0.807	5959	tags=45%, list=11%, signal=50%
GO_RESPONSE_TO_MURAMYL_DIPEPTIDE	GO_RESPONSE_TO_MURAMYL_DIPEPTIDE		20	0.652894	1.69038	0.00790514	0.097863	0.807	3876	tags=55%, list=7%, signal=59%
GO_SYNCYTIUM_FORMATION	GO_SYNCYTIUM_FORMATION		60	0.506862	1.68987	0.0137255	0.097601	0.808	3615	tags=38%, list=7%, signal=41%
GO_TOLL_LIKE_RECEPTOR_SIGNALING_PATHWAY	GO_TOLL_LIKE_RECEPTOR_SIGNALING_PATHWAY		149	0.505632	1.68818	0.0193424	0.0984042	0.81	5959	tags=46%, list=11%, signal=52%
GO_NEGATIVE_REGULATION_OF_CD4_POSITIVE_ALPHA_BETA_T_CELL_DIFFERENTIATION	GO_NEGATIVE_REGULATION_OF_CD4_POSITIVE_ALPHA_BETA_T_CELL_DIFFERENTIATION		21	0.684316	1.68796	0.0189474	0.0979587	0.81	4431	tags=57%, list=8%, signal=62%
GO_ACTIN_CYTOSKELETON_REORGANIZATION	GO_ACTIN_CYTOSKELETON_REORGANIZATION		105	0.487411	1.6845	0.0159363	0.10035	0.812	5730	tags=38%, list=10%, signal=42%
GO_ACTIVATED_T_CELL_PROLIFERATION	GO_ACTIVATED_T_CELL_PROLIFERATION		45	0.548452	1.68422	0.0157791	0.0999917	0.813	7202	tags=58%, list=13%, signal=66%
GO_BONE_REMODELING	GO_BONE_REMODELING		91	0.495562	1.68386	0.0156863	0.0996895	0.813	4132	tags=35%, list=7%, signal=38%
GO_NEGATIVE_REGULATION_OF_T_CELL_PROLIFERATION	GO_NEGATIVE_REGULATION_OF_T_CELL_PROLIFERATION		64	0.557753	1.68374	0.0220884	0.0991758	0.813	6003	tags=53%, list=11%, signal=60%
GO_TUMOR_NECROSIS_FACTOR_BIOSYNTHETIC_PROCESS	GO_TUMOR_NECROSIS_FACTOR_BIOSYNTHETIC_PROCESS		40	0.60295	1.68373	0.0337972	0.0985632	0.813	7963	tags=48%, list=14%, signal=55%
GO_MACROPHAGE_MIGRATION	GO_MACROPHAGE_MIGRATION		55	0.528173	1.68363	0.0240964	0.0980554	0.814	6190	tags=47%, list=11%, signal=53%
GO_MODULATION_BY_SYMBIONT_OF_ENTRY_INTO_HOST	GO_MODULATION_BY_SYMBIONT_OF_ENTRY_INTO_HOST		45	0.542463	1.68309	0.0262664	0.0978862	0.815	7378	tags=47%, list=13%, signal=54%
GO_INTERLEUKIN_5_PRODUCTION	GO_INTERLEUKIN_5_PRODUCTION		20	0.576254	1.68294	0.0160966	0.0974169	0.815	5244	tags=45%, list=9%, signal=50%
GO_REGULATION_OF_CELL_SHAPE	GO_REGULATION_OF_CELL_SHAPE		155	0.47706	1.68246	0.0159046	0.0971907	0.816	5447	tags=44%, list=10%, signal=49%
GO_GLIAL_CELL_ACTIVATION	GO_GLIAL_CELL_ACTIVATION		59	0.580427	1.68042	0.0201613	0.0985483	0.818	8815	tags=61%, list=16%, signal=72%
GO_LYMPHOCYTE_MIGRATION	GO_LYMPHOCYTE_MIGRATION		115	0.582091	1.67948	0.0314961	0.098769	0.818	6190	tags=44%, list=11%, signal=50%
GO_POSITIVE_REGULATION_OF_PRODUCTION_OF_MOLECULAR_MEDIATOR_OF_IMMUNE_RESPONSE	GO_POSITIVE_REGULATION_OF_PRODUCTION_OF_MOLECULAR_MEDIATOR_OF_IMMUNE_RESPONSE		100	0.522074	1.67856	0.0198413	0.0990569	0.82	6839	tags=47%, list=12%, signal=54%
GO_NEURON_PROJECTION_EXTENSION	GO_NEURON_PROJECTION_EXTENSION		172	0.469121	1.67792	0.0213592	0.099069	0.821	4892	tags=34%, list=9%, signal=38%
GO_TRANSFORMING_GROWTH_FACTOR_BETA_PRODUCTION	GO_TRANSFORMING_GROWTH_FACTOR_BETA_PRODUCTION		38	0.582217	1.67586	0.0177866	0.100198	0.824	5764	tags=63%, list=10%, signal=70%
GO_POSITIVE_REGULATION_OF_ACTIN_FILAMENT_POLYMERIZATION	GO_POSITIVE_REGULATION_OF_ACTIN_FILAMENT_POLYMERIZATION		101	0.472205	1.67529	0.0138889	0.100127	0.826	5640	tags=45%, list=10%, signal=50%
GO_NEGATIVE_REGULATION_OF_LEUKOCYTE_PROLIFERATION	GO_NEGATIVE_REGULATION_OF_LEUKOCYTE_PROLIFERATION		86	0.570788	1.67419	0.0289855	0.100536	0.827	6437	tags=53%, list=12%, signal=60%
GO_REGULATION_OF_TYPE_2_IMMUNE_RESPONSE	GO_REGULATION_OF_TYPE_2_IMMUNE_RESPONSE		31	0.586107	1.67206	0.026	0.101818	0.828	6338	tags=55%, list=11%, signal=62%
GO_REGULATION_OF_REACTIVE_OXYGEN_SPECIES_BIOSYNTHETIC_PROCESS	GO_REGULATION_OF_REACTIVE_OXYGEN_SPECIES_BIOSYNTHETIC_PROCESS		102	0.44314	1.66472	0.00787402	0.108218	0.84	6346	tags=35%, list=11%, signal=40%
GO_INTERFERON_GAMMA_PRODUCTION	GO_INTERFERON_GAMMA_PRODUCTION		113	0.586673	1.6647	0.0465587	0.107615	0.84	6443	tags=51%, list=12%, signal=58%
GO_MACROPHAGE_CHEMOTAXIS	GO_MACROPHAGE_CHEMOTAXIS		42	0.523982	1.66464	0.010142	0.107054	0.84	5722	tags=45%, list=10%, signal=50%
GO_POSITIVE_REGULATION_OF_MACROPHAGE_MIGRATION	GO_POSITIVE_REGULATION_OF_MACROPHAGE_MIGRATION		26	0.603548	1.66398	0.0258449	0.107098	0.84	5058	tags=50%, list=9%, signal=55%
GO_REGULATION_OF_NUCLEASE_ACTIVITY	GO_REGULATION_OF_NUCLEASE_ACTIVITY		22	0.605822	1.66367	0.0201613	0.106818	0.84	5915	tags=50%, list=11%, signal=56%
GO_REGULATION_OF_T_CELL_MEDIATED_IMMUNITY	GO_REGULATION_OF_T_CELL_MEDIATED_IMMUNITY		73	0.559054	1.66357	0.037182	0.106393	0.84	7963	tags=60%, list=14%, signal=70%
GO_ACTIN_FILAMENT_BASED_TRANSPORT	GO_ACTIN_FILAMENT_BASED_TRANSPORT		21	0.631514	1.66314	0.0157171	0.106175	0.84	6342	tags=52%, list=11%, signal=59%
GO_MITOTIC_G1_S_TRANSITION_CHECKPOINT	GO_MITOTIC_G1_S_TRANSITION_CHECKPOINT		64	0.518431	1.6628	0.0270793	0.105966	0.841	5765	tags=39%, list=10%, signal=44%
GO_ACUTE_PHASE_RESPONSE	GO_ACUTE_PHASE_RESPONSE		47	0.576536	1.66224	0.0165975	0.105889	0.842	8901	tags=55%, list=16%, signal=66%
GO_POSITIVE_REGULATION_OF_RECEPTOR_SIGNALING_PATHWAY_VIA_STAT	GO_POSITIVE_REGULATION_OF_RECEPTOR_SIGNALING_PATHWAY_VIA_STAT		90	0.517738	1.66041	0.0254902	0.106956	0.845	8065	tags=50%, list=15%, signal=58%
GO_INFLAMMATORY_RESPONSE_TO_ANTIGENIC_STIMULUS	GO_INFLAMMATORY_RESPONSE_TO_ANTIGENIC_STIMULUS		60	0.566423	1.65946	0.0446247	0.107282	0.848	7684	tags=52%, list=14%, signal=60%
GO_NEGATIVE_REGULATION_OF_RHO_PROTEIN_SIGNAL_TRANSDUCTION	GO_NEGATIVE_REGULATION_OF_RHO_PROTEIN_SIGNAL_TRANSDUCTION		22	0.625143	1.65941	0.0255403	0.106752	0.848	5809	tags=59%, list=10%, signal=66%
GO_LEUKOCYTE_ACTIVATION_INVOLVED_IN_INFLAMMATORY_RESPONSE	GO_LEUKOCYTE_ACTIVATION_INVOLVED_IN_INFLAMMATORY_RESPONSE		49	0.598449	1.65719	0.0384615	0.108307	0.85	8815	tags=61%, list=16%, signal=73%
GO_POSITIVE_REGULATION_OF_ERBB_SIGNALING_PATHWAY	GO_POSITIVE_REGULATION_OF_ERBB_SIGNALING_PATHWAY		38	0.525415	1.65654	0.0244399	0.108359	0.851	5118	tags=45%, list=9%, signal=49%
GO_GLIAL_CELL_MIGRATION	GO_GLIAL_CELL_MIGRATION		55	0.516624	1.65629	0.0178218	0.107997	0.852	4017	tags=40%, list=7%, signal=43%
GO_POSITIVE_REGULATION_OF_AMYLOID_BETA_FORMATION	GO_POSITIVE_REGULATION_OF_AMYLOID_BETA_FORMATION		20	0.608027	1.65603	0.0199203	0.107709	0.853	3306	tags=45%, list=6%, signal=48%
GO_ASTROCYTE_ACTIVATION	GO_ASTROCYTE_ACTIVATION		26	0.577204	1.65453	0.0245399	0.108487	0.854	9590	tags=65%, list=17%, signal=79%
GO_PATTERN_RECOGNITION_RECEPTOR_SIGNALING_PATHWAY	GO_PATTERN_RECOGNITION_RECEPTOR_SIGNALING_PATHWAY		198	0.478179	1.65341	0.0271845	0.108829	0.854	5579	tags=41%, list=10%, signal=45%
GO_FILOPODIUM_ASSEMBLY	GO_FILOPODIUM_ASSEMBLY		60	0.494639	1.65325	0.018	0.108381	0.854	5381	tags=47%, list=10%, signal=52%
GO_INTRINSIC_APOPTOTIC_SIGNALING_PATHWAY_IN_RESPONSE_TO_DNA_DAMAGE	GO_INTRINSIC_APOPTOTIC_SIGNALING_PATHWAY_IN_RESPONSE_TO_DNA_DAMAGE		103	0.452584	1.65197	0.0250965	0.108989	0.855	5686	tags=43%, list=10%, signal=48%
GO_REGULATION_OF_INTRINSIC_APOPTOTIC_SIGNALING_PATHWAY_IN_RESPONSE_TO_DNA_DAMAGE	GO_REGULATION_OF_INTRINSIC_APOPTOTIC_SIGNALING_PATHWAY_IN_RESPONSE_TO_DNA_DAMAGE		39	0.501352	1.65194	0.0221328	0.108448	0.855	4837	tags=41%, list=9%, signal=45%
GO_REGULATION_OF_PROTEIN_MATURATION	GO_REGULATION_OF_PROTEIN_MATURATION		69	0.449039	1.65185	0.00792079	0.107981	0.855	4211	tags=36%, list=8%, signal=39%
GO_NEGATIVE_REGULATION_OF_RECEPTOR_MEDIATED_ENDOCYTOSIS	GO_NEGATIVE_REGULATION_OF_RECEPTOR_MEDIATED_ENDOCYTOSIS		27	0.523834	1.65135	0.00796813	0.107855	0.855	5894	tags=44%, list=11%, signal=50%
GO_SUBSTRATE_ADHESION_DEPENDENT_CELL_SPREADING	GO_SUBSTRATE_ADHESION_DEPENDENT_CELL_SPREADING		106	0.483443	1.65089	0.0181818	0.107725	0.856	5502	tags=43%, list=10%, signal=48%
GO_CORTICAL_ACTIN_CYTOSKELETON_ORGANIZATION	GO_CORTICAL_ACTIN_CYTOSKELETON_ORGANIZATION		39	0.564157	1.64887	0.0221328	0.109106	0.865	6346	tags=59%, list=11%, signal=67%
GO_REGULATION_OF_MACROPHAGE_ACTIVATION	GO_REGULATION_OF_MACROPHAGE_ACTIVATION		58	0.552241	1.64792	0.0281125	0.109498	0.866	7696	tags=53%, list=14%, signal=62%
GO_ACUTE_INFLAMMATORY_RESPONSE	GO_ACUTE_INFLAMMATORY_RESPONSE		109	0.515763	1.6476	0.0209205	0.109244	0.869	7555	tags=47%, list=14%, signal=54%
GO_NECROTIC_CELL_DEATH	GO_NECROTIC_CELL_DEATH		59	0.463842	1.6469	0.0192308	0.109266	0.87	4788	tags=36%, list=9%, signal=39%
GO_ANIMAL_ORGAN_REGENERATION	GO_ANIMAL_ORGAN_REGENERATION		75	0.47057	1.64611	0.00952381	0.109537	0.872	7110	tags=43%, list=13%, signal=49%
GO_POSITIVE_REGULATION_OF_NATURAL_KILLER_CELL_ACTIVATION	GO_POSITIVE_REGULATION_OF_NATURAL_KILLER_CELL_ACTIVATION		20	0.652996	1.64576	0.0294118	0.109287	0.875	5828	tags=55%, list=11%, signal=61%
GO_POSITIVE_REGULATION_OF_ACUTE_INFLAMMATORY_RESPONSE	GO_POSITIVE_REGULATION_OF_ACUTE_INFLAMMATORY_RESPONSE		29	0.613575	1.64555	0.0304878	0.10891	0.875	7555	tags=62%, list=14%, signal=72%
GO_RESPONSE_TO_PROGESTERONE	GO_RESPONSE_TO_PROGESTERONE		46	0.47983	1.64497	0.0212766	0.108957	0.875	6475	tags=48%, list=12%, signal=54%
GO_RESPONSE_TO_GAMMA_RADIATION	GO_RESPONSE_TO_GAMMA_RADIATION		56	0.499565	1.64495	0.0272374	0.108434	0.875	5389	tags=45%, list=10%, signal=49%
GO_NEGATIVE_REGULATION_OF_T_CELL_DIFFERENTIATION	GO_NEGATIVE_REGULATION_OF_T_CELL_DIFFERENTIATION		45	0.549596	1.64357	0.0277778	0.109158	0.878	4431	tags=47%, list=8%, signal=51%
GO_CYTOKINE_PRODUCTION_INVOLVED_IN_IMMUNE_RESPONSE	GO_CYTOKINE_PRODUCTION_INVOLVED_IN_IMMUNE_RESPONSE		104	0.520083	1.64281	0.0337972	0.109347	0.878	6694	tags=52%, list=12%, signal=59%
GO_RUFFLE_ASSEMBLY	GO_RUFFLE_ASSEMBLY		44	0.502024	1.64199	0.0200401	0.109505	0.878	5664	tags=52%, list=10%, signal=58%
GO_REGULATION_OF_RUFFLE_ASSEMBLY	GO_REGULATION_OF_RUFFLE_ASSEMBLY		30	0.53082	1.64022	0.0217822	0.110681	0.882	5664	tags=53%, list=10%, signal=59%
GO_MEMBRANE_RAFT_ORGANIZATION	GO_MEMBRANE_RAFT_ORGANIZATION		26	0.545015	1.63892	0.0205761	0.111398	0.882	6443	tags=46%, list=12%, signal=52%
GO_REGULATION_OF_EPIDERMIS_DEVELOPMENT	GO_REGULATION_OF_EPIDERMIS_DEVELOPMENT		91	0.469465	1.63811	0.0120968	0.111621	0.885	4880	tags=37%, list=9%, signal=41%
GO_POSITIVE_REGULATION_OF_CD4_POSITIVE_ALPHA_BETA_T_CELL_ACTIVATION	GO_POSITIVE_REGULATION_OF_CD4_POSITIVE_ALPHA_BETA_T_CELL_ACTIVATION		35	0.632415	1.63784	0.029703	0.111341	0.885	6229	tags=57%, list=11%, signal=64%
GO_MYELOID_LEUKOCYTE_CYTOKINE_PRODUCTION	GO_MYELOID_LEUKOCYTE_CYTOKINE_PRODUCTION		30	0.55411	1.6364	0.027027	0.112242	0.886	6539	tags=60%, list=12%, signal=68%
GO_REGULATION_OF_KERATINOCYTE_DIFFERENTIATION	GO_REGULATION_OF_KERATINOCYTE_DIFFERENTIATION		45	0.522467	1.63624	0.010142	0.111869	0.886	4691	tags=38%, list=8%, signal=41%
GO_POSITIVE_REGULATION_OF_TUMOR_NECROSIS_FACTOR_BIOSYNTHETIC_PROCESS	GO_POSITIVE_REGULATION_OF_TUMOR_NECROSIS_FACTOR_BIOSYNTHETIC_PROCESS		25	0.631582	1.63399	0.0440882	0.113487	0.888	6190	tags=52%, list=11%, signal=59%
GO_REGULATION_OF_CELL_KILLING	GO_REGULATION_OF_CELL_KILLING		92	0.596531	1.63253	0.0428571	0.114421	0.891	5889	tags=45%, list=11%, signal=50%
GO_BONE_RESORPTION	GO_BONE_RESORPTION		64	0.509314	1.63217	0.0117188	0.114212	0.891	4132	tags=38%, list=7%, signal=40%
GO_POSITIVE_REGULATION_OF_LEUKOCYTE_DIFFERENTIATION	GO_POSITIVE_REGULATION_OF_LEUKOCYTE_DIFFERENTIATION		158	0.512421	1.63067	0.0316206	0.115023	0.893	7378	tags=49%, list=13%, signal=56%
GO_BARBED_END_ACTIN_FILAMENT_CAPPING	GO_BARBED_END_ACTIN_FILAMENT_CAPPING		26	0.577073	1.63004	0.0182186	0.115126	0.894	4939	tags=50%, list=9%, signal=55%
GO_NEGATIVE_REGULATION_OF_CHEMOTAXIS	GO_NEGATIVE_REGULATION_OF_CHEMOTAXIS		62	0.485918	1.62967	0.0142276	0.114994	0.894	6100	tags=39%, list=11%, signal=43%
GO_INTERLEUKIN_1_BETA_PRODUCTION	GO_INTERLEUKIN_1_BETA_PRODUCTION		104	0.52114	1.62902	0.0402414	0.115096	0.894	6665	tags=43%, list=12%, signal=49%
GO_REGULATION_OF_CD4_POSITIVE_ALPHA_BETA_T_CELL_ACTIVATION	GO_REGULATION_OF_CD4_POSITIVE_ALPHA_BETA_T_CELL_ACTIVATION		62	0.57362	1.62813	0.0420842	0.115412	0.896	6839	tags=50%, list=12%, signal=57%
GO_REGULATION_OF_TOLL_LIKE_RECEPTOR_4_SIGNALING_PATHWAY	GO_REGULATION_OF_TOLL_LIKE_RECEPTOR_4_SIGNALING_PATHWAY		23	0.619406	1.62753	0.0121951	0.115449	0.898	4147	tags=43%, list=7%, signal=47%
GO_NEGATIVE_REGULATION_OF_INTRINSIC_APOPTOTIC_SIGNALING_PATHWAY_IN_RESPONSE_TO_DNA_DAMAGE	GO_NEGATIVE_REGULATION_OF_INTRINSIC_APOPTOTIC_SIGNALING_PATHWAY_IN_RESPONSE_TO_DNA_DAMAGE		31	0.511692	1.62727	0.0235294	0.115261	0.9	4837	tags=42%, list=9%, signal=46%
GO_POSITIVE_REGULATION_OF_PATTERN_RECOGNITION_RECEPTOR_SIGNALING_PATHWAY	GO_POSITIVE_REGULATION_OF_PATTERN_RECOGNITION_RECEPTOR_SIGNALING_PATHWAY		37	0.561068	1.6272	0.0263158	0.1148	0.9	6517	tags=46%, list=12%, signal=52%
GO_REGULATION_OF_RESPONSE_TO_INTERFERON_GAMMA	GO_REGULATION_OF_RESPONSE_TO_INTERFERON_GAMMA		25	0.586971	1.62561	0.0284091	0.115772	0.902	4010	tags=40%, list=7%, signal=43%
GO_NEGATIVE_REGULATION_OF_NECROTIC_CELL_DEATH	GO_NEGATIVE_REGULATION_OF_NECROTIC_CELL_DEATH		20	0.574894	1.62509	0.018	0.115725	0.903	4788	tags=50%, list=9%, signal=55%
GO_POSITIVE_REGULATION_OF_ALPHA_BETA_T_CELL_ACTIVATION	GO_POSITIVE_REGULATION_OF_ALPHA_BETA_T_CELL_ACTIVATION		62	0.596679	1.62509	0.0565657	0.115223	0.903	8219	tags=58%, list=15%, signal=68%
GO_CYTOKINE_SECRETION	GO_CYTOKINE_SECRETION		127	0.489234	1.6247	0.046	0.115035	0.903	6060	tags=44%, list=11%, signal=49%
GO_REGULATION_OF_LEUKOCYTE_MEDIATED_CYTOTOXICITY	GO_REGULATION_OF_LEUKOCYTE_MEDIATED_CYTOTOXICITY		75	0.615704	1.62304	0.044898	0.115976	0.904	5889	tags=48%, list=11%, signal=54%
GO_REGULATION_OF_VIRAL_ENTRY_INTO_HOST_CELL	GO_REGULATION_OF_VIRAL_ENTRY_INTO_HOST_CELL		38	0.544157	1.62165	0.0418251	0.116862	0.906	7378	tags=45%, list=13%, signal=52%
GO_POSITIVE_REGULATION_OF_REACTIVE_OXYGEN_SPECIES_BIOSYNTHETIC_PROCESS	GO_POSITIVE_REGULATION_OF_REACTIVE_OXYGEN_SPECIES_BIOSYNTHETIC_PROCESS		58	0.466047	1.62123	0.0142276	0.11677	0.906	6346	tags=34%, list=11%, signal=39%
GO_TISSUE_REMODELING	GO_TISSUE_REMODELING		170	0.463491	1.6196	0.0184049	0.117769	0.908	5565	tags=36%, list=10%, signal=40%
GO_ACTIVATION_OF_INNATE_IMMUNE_RESPONSE	GO_ACTIVATION_OF_INNATE_IMMUNE_RESPONSE		141	0.477714	1.61892	0.0346154	0.117941	0.909	8826	tags=46%, list=16%, signal=55%
GO_CELLULAR_RESPONSE_TO_IONIZING_RADIATION	GO_CELLULAR_RESPONSE_TO_IONIZING_RADIATION		68	0.484268	1.61881	0.0282828	0.117538	0.909	7075	tags=47%, list=13%, signal=54%
GO_NATURAL_KILLER_CELL_ACTIVATION	GO_NATURAL_KILLER_CELL_ACTIVATION		84	0.510346	1.61781	0.0366599	0.118058	0.909	7704	tags=48%, list=14%, signal=55%
GO_LYMPHOCYTE_ACTIVATION_INVOLVED_IN_IMMUNE_RESPONSE	GO_LYMPHOCYTE_ACTIVATION_INVOLVED_IN_IMMUNE_RESPONSE		186	0.490758	1.617	0.0446602	0.118336	0.912	5763	tags=39%, list=10%, signal=44%
GO_REGULATION_OF_RESPONSE_TO_CYTOKINE_STIMULUS	GO_REGULATION_OF_RESPONSE_TO_CYTOKINE_STIMULUS		190	0.451349	1.61401	0.0361905	0.120816	0.916	6346	tags=37%, list=11%, signal=41%
GO_NATURAL_KILLER_CELL_MEDIATED_IMMUNITY	GO_NATURAL_KILLER_CELL_MEDIATED_IMMUNITY		66	0.602771	1.61313	0.0697211	0.121071	0.916	8977	tags=55%, list=16%, signal=65%
GO_POSITIVE_REGULATION_OF_ENDOCYTOSIS	GO_POSITIVE_REGULATION_OF_ENDOCYTOSIS		100	0.442515	1.61151	0.0176471	0.122117	0.916	5057	tags=39%, list=9%, signal=43%
GO_REGULATION_OF_PATTERN_RECOGNITION_RECEPTOR_SIGNALING_PATHWAY	GO_REGULATION_OF_PATTERN_RECOGNITION_RECEPTOR_SIGNALING_PATHWAY		96	0.481969	1.61148	0.032381	0.121666	0.917	6517	tags=41%, list=12%, signal=46%
GO_REGULATION_OF_ALPHA_BETA_T_CELL_DIFFERENTIATION	GO_REGULATION_OF_ALPHA_BETA_T_CELL_DIFFERENTIATION		63	0.564822	1.61093	0.0483871	0.121772	0.917	6229	tags=48%, list=11%, signal=54%
GO_MODULATION_OF_EXCITATORY_POSTSYNAPTIC_POTENTIAL	GO_MODULATION_OF_EXCITATORY_POSTSYNAPTIC_POTENTIAL		45	0.495819	1.61069	0.00976562	0.121552	0.917	4178	tags=40%, list=8%, signal=43%
GO_NEGATIVE_REGULATION_OF_ALPHA_BETA_T_CELL_DIFFERENTIATION	GO_NEGATIVE_REGULATION_OF_ALPHA_BETA_T_CELL_DIFFERENTIATION		25	0.609901	1.60905	0.0285714	0.122743	0.923	4431	tags=48%, list=8%, signal=52%
GO_REGULATION_OF_MONOCYTE_CHEMOTAXIS	GO_REGULATION_OF_MONOCYTE_CHEMOTAXIS		26	0.57377	1.60858	0.0421687	0.122683	0.923	3580	tags=50%, list=6%, signal=53%
GO_POSITIVE_REGULATION_OF_APOPTOTIC_SIGNALING_PATHWAY	GO_POSITIVE_REGULATION_OF_APOPTOTIC_SIGNALING_PATHWAY		181	0.407073	1.60857	0.0123711	0.122195	0.923	6346	tags=38%, list=11%, signal=43%
GO_POSITIVE_REGULATION_OF_EXTRINSIC_APOPTOTIC_SIGNALING_PATHWAY	GO_POSITIVE_REGULATION_OF_EXTRINSIC_APOPTOTIC_SIGNALING_PATHWAY		51	0.496527	1.60843	0.0185567	0.121844	0.923	6346	tags=45%, list=11%, signal=51%
GO_POSITIVE_REGULATION_OF_INTERFERON_GAMMA_PRODUCTION	GO_POSITIVE_REGULATION_OF_INTERFERON_GAMMA_PRODUCTION		65	0.61927	1.60788	0.0661323	0.122011	0.924	8936	tags=65%, list=16%, signal=77%
GO_POSITIVE_REGULATION_OF_LEUKOCYTE_MEDIATED_IMMUNITY	GO_POSITIVE_REGULATION_OF_LEUKOCYTE_MEDIATED_IMMUNITY		138	0.514523	1.60778	0.0588235	0.121647	0.924	7704	tags=51%, list=14%, signal=60%
GO_REGULATION_OF_PROTEIN_LOCALIZATION_TO_NUCLEUS	GO_REGULATION_OF_PROTEIN_LOCALIZATION_TO_NUCLEUS		126	0.447445	1.60778	0.0254902	0.121162	0.924	6094	tags=40%, list=11%, signal=44%
GO_REGULATION_OF_EPIDERMAL_CELL_DIFFERENTIATION	GO_REGULATION_OF_EPIDERMAL_CELL_DIFFERENTIATION		65	0.479674	1.60702	0.0104603	0.121409	0.925	4880	tags=38%, list=9%, signal=42%
GO_ENDODERMAL_CELL_DIFFERENTIATION	GO_ENDODERMAL_CELL_DIFFERENTIATION		46	0.521066	1.60659	0.027833	0.121377	0.925	6349	tags=48%, list=11%, signal=54%
GO_TYPE_2_IMMUNE_RESPONSE	GO_TYPE_2_IMMUNE_RESPONSE		39	0.54631	1.60638	0.0443548	0.121115	0.925	6694	tags=54%, list=12%, signal=61%
GO_MYELOID_DENDRITIC_CELL_ACTIVATION	GO_MYELOID_DENDRITIC_CELL_ACTIVATION		29	0.631675	1.60437	0.0767677	0.122488	0.926	6455	tags=59%, list=12%, signal=66%
GO_CD4_POSITIVE_ALPHA_BETA_T_CELL_ACTIVATION	GO_CD4_POSITIVE_ALPHA_BETA_T_CELL_ACTIVATION		96	0.530585	1.60238	0.0464646	0.123863	0.93	5763	tags=41%, list=10%, signal=45%
GO_NEGATIVE_REGULATION_OF_LYMPHOCYTE_DIFFERENTIATION	GO_NEGATIVE_REGULATION_OF_LYMPHOCYTE_DIFFERENTIATION		54	0.504088	1.60089	0.0357853	0.124814	0.93	4431	tags=41%, list=8%, signal=44%
GO_TELOMERE_MAINTENANCE_VIA_SEMI_CONSERVATIVE_REPLICATION	GO_TELOMERE_MAINTENANCE_VIA_SEMI_CONSERVATIVE_REPLICATION		27	0.646324	1.60046	0.0533881	0.124796	0.93	6588	tags=63%, list=12%, signal=71%
GO_GRANULOCYTE_MIGRATION	GO_GRANULOCYTE_MIGRATION		146	0.506663	1.59957	0.05	0.125182	0.932	6299	tags=47%, list=11%, signal=53%
GO_PROGRAMMED_NECROTIC_CELL_DEATH	GO_PROGRAMMED_NECROTIC_CELL_DEATH		48	0.484466	1.59872	0.0250482	0.12566	0.932	4788	tags=40%, list=9%, signal=43%
GO_3_UTR_MEDIATED_MRNA_STABILIZATION	GO_3_UTR_MEDIATED_MRNA_STABILIZATION		23	0.566864	1.59811	0.0338645	0.125812	0.932	7231	tags=35%, list=13%, signal=40%
GO_POSITIVE_REGULATION_OF_PROTEIN_POLYMERIZATION	GO_POSITIVE_REGULATION_OF_PROTEIN_POLYMERIZATION		137	0.437868	1.5981	0.0255403	0.125348	0.932	5640	tags=39%, list=10%, signal=44%
GO_DOPAMINE_RECEPTOR_SIGNALING_PATHWAY	GO_DOPAMINE_RECEPTOR_SIGNALING_PATHWAY		41	0.462919	1.59743	0.00984252	0.125435	0.932	4249	tags=39%, list=8%, signal=42%
GO_REGULATION_OF_PRODUCTION_OF_MOLECULAR_MEDIATOR_OF_IMMUNE_RESPONSE	GO_REGULATION_OF_PRODUCTION_OF_MOLECULAR_MEDIATOR_OF_IMMUNE_RESPONSE		144	0.480346	1.59703	0.0508806	0.12541	0.932	6539	tags=45%, list=12%, signal=51%
GO_CHROMATIN_DISASSEMBLY	GO_CHROMATIN_DISASSEMBLY		20	0.608518	1.59654	0.0272537	0.125441	0.932	4134	tags=50%, list=7%, signal=54%
GO_POSITIVE_REGULATION_OF_LYMPHOCYTE_MEDIATED_IMMUNITY	GO_POSITIVE_REGULATION_OF_LYMPHOCYTE_MEDIATED_IMMUNITY		106	0.537123	1.59645	0.0562249	0.125077	0.932	7704	tags=50%, list=14%, signal=58%
GO_NEGATIVE_REGULATION_OF_RESPONSE_TO_DNA_DAMAGE_STIMULUS	GO_NEGATIVE_REGULATION_OF_RESPONSE_TO_DNA_DAMAGE_STIMULUS		83	0.461931	1.59498	0.0295858	0.126066	0.933	4837	tags=35%, list=9%, signal=38%
GO_RRNA_TRANSCRIPTION	GO_RRNA_TRANSCRIPTION		33	0.546987	1.59386	0.0413223	0.126652	0.933	3734	tags=36%, list=7%, signal=39%
GO_GRANULOCYTE_CHEMOTAXIS	GO_GRANULOCYTE_CHEMOTAXIS		123	0.505143	1.59273	0.0456349	0.127357	0.934	6299	tags=47%, list=11%, signal=53%
GO_POSITIVE_REGULATION_OF_NF_KAPPAB_TRANSCRIPTION_FACTOR_ACTIVITY	GO_POSITIVE_REGULATION_OF_NF_KAPPAB_TRANSCRIPTION_FACTOR_ACTIVITY		159	0.46591	1.59249	0.0344168	0.127189	0.934	6346	tags=40%, list=11%, signal=45%
GO_COLLAGEN_METABOLIC_PROCESS	GO_COLLAGEN_METABOLIC_PROCESS		107	0.462357	1.59224	0.0376238	0.126979	0.934	5741	tags=47%, list=10%, signal=52%
GO_RHO_PROTEIN_SIGNAL_TRANSDUCTION	GO_RHO_PROTEIN_SIGNAL_TRANSDUCTION		140	0.469365	1.59106	0.0424242	0.127632	0.934	6514	tags=46%, list=12%, signal=52%
GO_PURINE_NUCLEOSIDE_MONOPHOSPHATE_BIOSYNTHETIC_PROCESS	GO_PURINE_NUCLEOSIDE_MONOPHOSPHATE_BIOSYNTHETIC_PROCESS		22	0.56015	1.59033	0.0292887	0.127886	0.935	3716	tags=36%, list=7%, signal=39%
GO_MESENCHYMAL_TO_EPITHELIAL_TRANSITION	GO_MESENCHYMAL_TO_EPITHELIAL_TRANSITION		20	0.535374	1.58998	0.0147992	0.127782	0.935	4125	tags=55%, list=7%, signal=59%
GO_ENDODERM_FORMATION	GO_ENDODERM_FORMATION		55	0.510332	1.58968	0.0300601	0.127592	0.935	4438	tags=40%, list=8%, signal=43%
GO_REGULATION_OF_LEUKOCYTE_DEGRANULATION	GO_REGULATION_OF_LEUKOCYTE_DEGRANULATION		47	0.533388	1.5893	0.0626263	0.127547	0.935	6514	tags=57%, list=12%, signal=65%
GO_MONONUCLEAR_CELL_MIGRATION	GO_MONONUCLEAR_CELL_MIGRATION		95	0.518298	1.58906	0.046748	0.127313	0.935	6449	tags=47%, list=12%, signal=54%
GO_NEGATIVE_REGULATION_OF_TYPE_I_INTERFERON_PRODUCTION	GO_NEGATIVE_REGULATION_OF_TYPE_I_INTERFERON_PRODUCTION		46	0.544352	1.58897	0.0408163	0.126938	0.935	7963	tags=52%, list=14%, signal=61%
GO_MONOCYTE_CHEMOTAXIS	GO_MONOCYTE_CHEMOTAXIS		65	0.552359	1.58869	0.0478088	0.126856	0.935	6449	tags=49%, list=12%, signal=56%
GO_REGULATION_OF_MONONUCLEAR_CELL_MIGRATION	GO_REGULATION_OF_MONONUCLEAR_CELL_MIGRATION		51	0.506744	1.58867	0.0504032	0.126421	0.935	5058	tags=45%, list=9%, signal=50%
GO_POSITIVE_REGULATION_OF_PEPTIDYL_THREONINE_PHOSPHORYLATION	GO_POSITIVE_REGULATION_OF_PEPTIDYL_THREONINE_PHOSPHORYLATION		30	0.529404	1.5885	0.0292276	0.126121	0.935	3894	tags=40%, list=7%, signal=43%
GO_NEGATIVE_REGULATION_OF_IMMUNE_RESPONSE	GO_NEGATIVE_REGULATION_OF_IMMUNE_RESPONSE		154	0.504247	1.58806	0.0479042	0.126066	0.935	7963	tags=51%, list=14%, signal=60%
GO_INTERLEUKIN_12_PRODUCTION	GO_INTERLEUKIN_12_PRODUCTION		56	0.598791	1.58725	0.0570265	0.126376	0.939	8815	tags=59%, list=16%, signal=70%
GO_NEGATIVE_REGULATION_OF_CELL_PROJECTION_ORGANIZATION	GO_NEGATIVE_REGULATION_OF_CELL_PROJECTION_ORGANIZATION		185	0.42133	1.58564	0.0174419	0.127539	0.939	5839	tags=35%, list=11%, signal=39%
GO_CORNIFICATION	GO_CORNIFICATION		113	0.526414	1.58492	0.0365112	0.127815	0.939	8330	tags=47%, list=15%, signal=55%
GO_CELL_ADHESION_MEDIATED_BY_INTEGRIN	GO_CELL_ADHESION_MEDIATED_BY_INTEGRIN		71	0.512919	1.58346	0.0343434	0.128745	0.94	6003	tags=42%, list=11%, signal=47%
GO_REGULATION_OF_T_CELL_RECEPTOR_SIGNALING_PATHWAY	GO_REGULATION_OF_T_CELL_RECEPTOR_SIGNALING_PATHWAY		43	0.574992	1.58345	0.0689655	0.128301	0.94	7598	tags=53%, list=14%, signal=62%
GO_MEMBRANE_BIOGENESIS	GO_MEMBRANE_BIOGENESIS		44	0.455869	1.58327	0.0191571	0.128027	0.94	4788	tags=41%, list=9%, signal=45%
GO_RUFFLE_ORGANIZATION	GO_RUFFLE_ORGANIZATION		56	0.489314	1.58298	0.0322581	0.127836	0.94	5681	tags=50%, list=10%, signal=56%
GO_CELLULAR_EXTRAVASATION	GO_CELLULAR_EXTRAVASATION		67	0.548325	1.58283	0.0482897	0.127542	0.94	6556	tags=54%, list=12%, signal=61%
GO_RETINAL_GANGLION_CELL_AXON_GUIDANCE	GO_RETINAL_GANGLION_CELL_AXON_GUIDANCE		20	0.539426	1.58017	0.0348162	0.129777	0.942	3457	tags=40%, list=6%, signal=43%
GO_REGULATION_OF_ADAPTIVE_IMMUNE_RESPONSE	GO_REGULATION_OF_ADAPTIVE_IMMUNE_RESPONSE		167	0.50175	1.57983	0.0642023	0.129703	0.942	6400	tags=49%, list=12%, signal=55%
GO_COLLAGEN_FIBRIL_ORGANIZATION	GO_COLLAGEN_FIBRIL_ORGANIZATION		53	0.569236	1.57926	0.0701754	0.129772	0.943	5590	tags=53%, list=10%, signal=59%
GO_NEGATIVE_REGULATION_OF_REGULATED_SECRETORY_PATHWAY	GO_NEGATIVE_REGULATION_OF_REGULATED_SECRETORY_PATHWAY		24	0.595066	1.57918	0.0398406	0.129405	0.943	7762	tags=71%, list=14%, signal=82%
GO_NEGATIVE_REGULATION_OF_NEURON_PROJECTION_DEVELOPMENT	GO_NEGATIVE_REGULATION_OF_NEURON_PROJECTION_DEVELOPMENT		153	0.431092	1.57873	0.0233463	0.129362	0.943	5839	tags=37%, list=11%, signal=41%
GO_REGULATION_OF_GRANULOCYTE_CHEMOTAXIS	GO_REGULATION_OF_GRANULOCYTE_CHEMOTAXIS		51	0.510348	1.57864	0.0488281	0.129011	0.943	5058	tags=45%, list=9%, signal=50%
GO_REGULATION_OF_EXTRACELLULAR_MATRIX_ORGANIZATION	GO_REGULATION_OF_EXTRACELLULAR_MATRIX_ORGANIZATION		42	0.531739	1.57812	0.0343434	0.129057	0.943	4930	tags=40%, list=9%, signal=44%
GO_PROTEIN_LOCALIZATION_TO_CELL_SURFACE	GO_PROTEIN_LOCALIZATION_TO_CELL_SURFACE		66	0.448158	1.57702	0.0220441	0.129684	0.944	3788	tags=38%, list=7%, signal=41%
GO_REGULATION_OF_DOUBLE_STRAND_BREAK_REPAIR_VIA_HOMOLOGOUS_RECOMBINATION	GO_REGULATION_OF_DOUBLE_STRAND_BREAK_REPAIR_VIA_HOMOLOGOUS_RECOMBINATION		47	0.52873	1.57589	0.0378486	0.130366	0.945	5839	tags=45%, list=11%, signal=50%
GO_REGULATION_OF_VIRAL_LIFE_CYCLE	GO_REGULATION_OF_VIRAL_LIFE_CYCLE		157	0.445092	1.5757	0.0315399	0.130104	0.946	7378	tags=42%, list=13%, signal=48%
GO_REGULATION_OF_T_CELL_MIGRATION	GO_REGULATION_OF_T_CELL_MIGRATION		44	0.579827	1.57473	0.0767717	0.13062	0.947	6556	tags=45%, list=12%, signal=52%
GO_REGENERATION	GO_REGENERATION		199	0.408079	1.57402	0.0194175	0.130916	0.947	5411	tags=31%, list=10%, signal=34%
GO_POSITIVE_REGULATION_OF_PROTEIN_LOCALIZATION_TO_MEMBRANE	GO_POSITIVE_REGULATION_OF_PROTEIN_LOCALIZATION_TO_MEMBRANE		126	0.412763	1.5739	0.0196464	0.130615	0.947	6346	tags=44%, list=11%, signal=49%
GO_GANGLIOSIDE_METABOLIC_PROCESS	GO_GANGLIOSIDE_METABOLIC_PROCESS		22	0.532103	1.57338	0.0369565	0.130661	0.947	3529	tags=32%, list=6%, signal=34%
GO_POSITIVE_REGULATION_OF_INTERLEUKIN_10_PRODUCTION	GO_POSITIVE_REGULATION_OF_INTERLEUKIN_10_PRODUCTION		38	0.584903	1.57116	0.0711382	0.132333	0.947	8878	tags=58%, list=16%, signal=69%
GO_REGULATION_OF_NATURAL_KILLER_CELL_ACTIVATION	GO_REGULATION_OF_NATURAL_KILLER_CELL_ACTIVATION		34	0.580164	1.56978	0.0472279	0.133155	0.948	6565	tags=50%, list=12%, signal=57%
GO_REGULATION_OF_TRANSCRIPTION_INVOLVED_IN_G1_S_TRANSITION_OF_MITOTIC_CELL_CYCLE	GO_REGULATION_OF_TRANSCRIPTION_INVOLVED_IN_G1_S_TRANSITION_OF_MITOTIC_CELL_CYCLE		35	0.571776	1.56906	0.056	0.133421	0.949	8905	tags=57%, list=16%, signal=68%
GO_ACTIVATION_OF_MAPK_ACTIVITY	GO_ACTIVATION_OF_MAPK_ACTIVITY		156	0.413521	1.56902	0.0325671	0.133049	0.949	5158	tags=31%, list=9%, signal=34%
GO_POSITIVE_REGULATION_OF_SMOOTH_MUSCLE_CELL_MIGRATION	GO_POSITIVE_REGULATION_OF_SMOOTH_MUSCLE_CELL_MIGRATION		44	0.496684	1.56819	0.0333333	0.133502	0.95	2957	tags=34%, list=5%, signal=36%
GO_REGULATION_OF_NATURAL_KILLER_CELL_MEDIATED_IMMUNITY	GO_REGULATION_OF_NATURAL_KILLER_CELL_MEDIATED_IMMUNITY		45	0.64495	1.56733	0.0674847	0.13393	0.951	10781	tags=60%, list=19%, signal=74%
GO_REGULATION_OF_PROTEIN_LOCALIZATION_TO_CELL_SURFACE	GO_REGULATION_OF_PROTEIN_LOCALIZATION_TO_CELL_SURFACE		41	0.469691	1.56698	0.0263158	0.133841	0.951	6798	tags=49%, list=12%, signal=56%
GO_POSITIVE_REGULATION_OF_INFLAMMATORY_RESPONSE	GO_POSITIVE_REGULATION_OF_INFLAMMATORY_RESPONSE		151	0.469957	1.56678	0.0557769	0.133612	0.951	7685	tags=46%, list=14%, signal=54%
GO_RNA_DEPENDENT_DNA_BIOSYNTHETIC_PROCESS	GO_RNA_DEPENDENT_DNA_BIOSYNTHETIC_PROCESS		70	0.527421	1.56343	0.0672269	0.136498	0.954	6846	tags=53%, list=12%, signal=60%
GO_SIGNAL_TRANSDUCTION_IN_ABSENCE_OF_LIGAND	GO_SIGNAL_TRANSDUCTION_IN_ABSENCE_OF_LIGAND		73	0.433922	1.56278	0.0228137	0.136718	0.954	3176	tags=27%, list=6%, signal=29%
GO_AMYLOID_BETA_METABOLIC_PROCESS	GO_AMYLOID_BETA_METABOLIC_PROCESS		51	0.469647	1.5621	0.042	0.136993	0.955	3910	tags=35%, list=7%, signal=38%
GO_POSITIVE_REGULATION_OF_LYMPHOCYTE_MIGRATION	GO_POSITIVE_REGULATION_OF_LYMPHOCYTE_MIGRATION		38	0.581275	1.56044	0.061753	0.138244	0.955	6190	tags=45%, list=11%, signal=50%
GO_INTRINSIC_APOPTOTIC_SIGNALING_PATHWAY_BY_P53_CLASS_MEDIATOR	GO_INTRINSIC_APOPTOTIC_SIGNALING_PATHWAY_BY_P53_CLASS_MEDIATOR		77	0.42414	1.55973	0.0342857	0.138581	0.955	5025	tags=40%, list=9%, signal=44%
GO_OOCYTE_MATURATION	GO_OOCYTE_MATURATION		27	0.520744	1.55951	0.0375494	0.138353	0.955	5865	tags=48%, list=11%, signal=54%
GO_REGULATION_OF_BICELLULAR_TIGHT_JUNCTION_ASSEMBLY	GO_REGULATION_OF_BICELLULAR_TIGHT_JUNCTION_ASSEMBLY		23	0.568385	1.55774	0.0372549	0.139672	0.955	2785	tags=39%, list=5%, signal=41%
GO_POSITIVE_REGULATION_OF_T_CELL_MIGRATION	GO_POSITIVE_REGULATION_OF_T_CELL_MIGRATION		31	0.603353	1.5569	0.0727273	0.140018	0.955	6190	tags=45%, list=11%, signal=51%
GO_TISSUE_REGENERATION	GO_TISSUE_REGENERATION		77	0.4366	1.55677	0.0189394	0.139713	0.955	3145	tags=30%, list=6%, signal=32%
GO_REGULATION_OF_LYMPHOCYTE_APOPTOTIC_PROCESS	GO_REGULATION_OF_LYMPHOCYTE_APOPTOTIC_PROCESS		56	0.505291	1.55651	0.0764588	0.139524	0.955	5523	tags=48%, list=10%, signal=53%
GO_CELLULAR_RESPONSE_TO_MECHANICAL_STIMULUS	GO_CELLULAR_RESPONSE_TO_MECHANICAL_STIMULUS		79	0.454462	1.55418	0.0423077	0.141442	0.955	5033	tags=42%, list=9%, signal=46%
GO_RESPONSE_TO_IONIZING_RADIATION	GO_RESPONSE_TO_IONIZING_RADIATION		144	0.445452	1.55371	0.0516252	0.14149	0.955	5389	tags=38%, list=10%, signal=41%
GO_HOMOTYPIC_CELL_CELL_ADHESION	GO_HOMOTYPIC_CELL_CELL_ADHESION		86	0.438961	1.5529	0.0359281	0.141847	0.956	6003	tags=41%, list=11%, signal=46%
GO_REGULATION_OF_KERATINOCYTE_PROLIFERATION	GO_REGULATION_OF_KERATINOCYTE_PROLIFERATION		38	0.523855	1.55269	0.027833	0.141629	0.956	2887	tags=29%, list=5%, signal=31%
GO_NEGATIVE_REGULATION_OF_ALPHA_BETA_T_CELL_ACTIVATION	GO_NEGATIVE_REGULATION_OF_ALPHA_BETA_T_CELL_ACTIVATION		40	0.538757	1.55241	0.0670611	0.141508	0.956	4777	tags=38%, list=9%, signal=41%
GO_TYPE_I_INTERFERON_PRODUCTION	GO_TYPE_I_INTERFERON_PRODUCTION		126	0.475737	1.55239	0.0592734	0.141105	0.956	6972	tags=43%, list=13%, signal=49%
GO_NEGATIVE_REGULATION_OF_DNA_REPAIR	GO_NEGATIVE_REGULATION_OF_DNA_REPAIR		36	0.510359	1.55131	0.0510204	0.141759	0.958	4413	tags=36%, list=8%, signal=39%
GO_O_GLYCAN_PROCESSING	GO_O_GLYCAN_PROCESSING		60	0.456291	1.54879	0.0222672	0.143959	0.959	5352	tags=42%, list=10%, signal=46%
GO_VIRAL_GENE_EXPRESSION	GO_VIRAL_GENE_EXPRESSION		195	0.520527	1.54792	0.108787	0.14444	0.962	7229	tags=48%, list=13%, signal=55%
GO_INTERFERON_BETA_PRODUCTION	GO_INTERFERON_BETA_PRODUCTION		50	0.51078	1.54757	0.0559846	0.144345	0.962	4091	tags=38%, list=7%, signal=41%
GO_RESPONSE_TO_ISOQUINOLINE_ALKALOID	GO_RESPONSE_TO_ISOQUINOLINE_ALKALOID		31	0.493811	1.54702	0.0328542	0.144472	0.963	3372	tags=35%, list=6%, signal=38%
GO_LYMPHOCYTE_COSTIMULATION	GO_LYMPHOCYTE_COSTIMULATION		58	0.590837	1.5467	0.0838323	0.144358	0.963	6400	tags=50%, list=12%, signal=56%
GO_LYMPHOCYTE_APOPTOTIC_PROCESS	GO_LYMPHOCYTE_APOPTOTIC_PROCESS		73	0.479982	1.54654	0.0595483	0.144095	0.963	7369	tags=51%, list=13%, signal=58%
GO_AXONAL_FASCICULATION	GO_AXONAL_FASCICULATION		23	0.539359	1.54634	0.0374753	0.143881	0.963	3611	tags=43%, list=7%, signal=46%
GO_POSITIVE_REGULATION_OF_CYSTEINE_TYPE_ENDOPEPTIDASE_ACTIVITY	GO_POSITIVE_REGULATION_OF_CYSTEINE_TYPE_ENDOPEPTIDASE_ACTIVITY		150	0.415389	1.54582	0.0258449	0.144022	0.963	6054	tags=39%, list=11%, signal=44%
GO_REGULATION_OF_LYMPHOCYTE_MIGRATION	GO_REGULATION_OF_LYMPHOCYTE_MIGRATION		64	0.545747	1.54551	0.0712871	0.143891	0.963	6556	tags=42%, list=12%, signal=48%
GO_PHOSPHATIDYLSERINE_ACYL_CHAIN_REMODELING	GO_PHOSPHATIDYLSERINE_ACYL_CHAIN_REMODELING		21	0.54366	1.54477	0.030888	0.144174	0.963	5410	tags=43%, list=10%, signal=47%
GO_REGULATION_OF_PHAGOCYTOSIS	GO_REGULATION_OF_PHAGOCYTOSIS		95	0.471454	1.54332	0.055666	0.145269	0.963	6514	tags=47%, list=12%, signal=54%
GO_POSITIVE_REGULATION_OF_INTERFERON_BETA_PRODUCTION	GO_POSITIVE_REGULATION_OF_INTERFERON_BETA_PRODUCTION		30	0.546785	1.54246	0.0769231	0.145691	0.963	6517	tags=53%, list=12%, signal=60%
GO_REACTIVE_OXYGEN_SPECIES_BIOSYNTHETIC_PROCESS	GO_REACTIVE_OXYGEN_SPECIES_BIOSYNTHETIC_PROCESS		123	0.400406	1.54207	0.0256917	0.14562	0.963	5764	tags=33%, list=10%, signal=36%
GO_POSITIVE_REGULATION_OF_TYPE_I_INTERFERON_PRODUCTION	GO_POSITIVE_REGULATION_OF_TYPE_I_INTERFERON_PRODUCTION		74	0.475108	1.542	0.0590476	0.145255	0.963	4301	tags=38%, list=8%, signal=41%
GO_CHRONIC_INFLAMMATORY_RESPONSE	GO_CHRONIC_INFLAMMATORY_RESPONSE		20	0.66312	1.54166	0.0630081	0.145214	0.963	8326	tags=65%, list=15%, signal=76%
GO_SUPEROXIDE_ANION_GENERATION	GO_SUPEROXIDE_ANION_GENERATION		36	0.503539	1.54129	0.0606695	0.14515	0.963	3884	tags=39%, list=7%, signal=42%
GO_POSITIVE_REGULATION_OF_LEUKOCYTE_APOPTOTIC_PROCESS	GO_POSITIVE_REGULATION_OF_LEUKOCYTE_APOPTOTIC_PROCESS		29	0.551039	1.54109	0.0641822	0.14495	0.963	6229	tags=55%, list=11%, signal=62%
GO_LEUKOCYTE_ADHESION_TO_VASCULAR_ENDOTHELIAL_CELL	GO_LEUKOCYTE_ADHESION_TO_VASCULAR_ENDOTHELIAL_CELL		49	0.529892	1.54102	0.0639535	0.144592	0.963	6346	tags=43%, list=11%, signal=48%
GO_MAMMARY_GLAND_EPITHELIUM_DEVELOPMENT	GO_MAMMARY_GLAND_EPITHELIUM_DEVELOPMENT		71	0.443607	1.5408	0.0275591	0.144372	0.963	5105	tags=41%, list=9%, signal=45%
GO_REGULATION_OF_RESPONSE_TO_WOUNDING	GO_REGULATION_OF_RESPONSE_TO_WOUNDING		177	0.429042	1.53983	0.0236686	0.144943	0.963	5862	tags=36%, list=11%, signal=40%
GO_MOTOR_NEURON_AXON_GUIDANCE	GO_MOTOR_NEURON_AXON_GUIDANCE		31	0.502252	1.53973	0.0258449	0.144619	0.963	3213	tags=32%, list=6%, signal=34%
GO_REGULATION_OF_ANTIGEN_PROCESSING_AND_PRESENTATION	GO_REGULATION_OF_ANTIGEN_PROCESSING_AND_PRESENTATION		20	0.678281	1.53894	0.0728745	0.144937	0.963	5640	tags=65%, list=10%, signal=72%
GO_NEGATIVE_REGULATION_OF_RESPONSE_TO_OXIDATIVE_STRESS	GO_NEGATIVE_REGULATION_OF_RESPONSE_TO_OXIDATIVE_STRESS		49	0.438078	1.53758	0.0180361	0.145921	0.963	6814	tags=45%, list=12%, signal=51%
GO_POSITIVE_REGULATION_OF_GLIOGENESIS	GO_POSITIVE_REGULATION_OF_GLIOGENESIS		76	0.437209	1.53709	0.0405405	0.14602	0.963	6944	tags=46%, list=13%, signal=53%
GO_REGULATION_OF_ALPHA_BETA_T_CELL_ACTIVATION	GO_REGULATION_OF_ALPHA_BETA_T_CELL_ACTIVATION		96	0.521869	1.53581	0.100196	0.147059	0.965	8936	tags=55%, list=16%, signal=66%
GO_POSITIVE_REGULATION_OF_PROTEIN_LOCALIZATION_TO_CELL_PERIPHERY	GO_POSITIVE_REGULATION_OF_PROTEIN_LOCALIZATION_TO_CELL_PERIPHERY		67	0.434808	1.53571	0.0285132	0.146739	0.965	6346	tags=46%, list=11%, signal=52%
GO_PLATELET_DEGRANULATION	GO_PLATELET_DEGRANULATION		129	0.428692	1.53547	0.0264766	0.146541	0.965	4526	tags=33%, list=8%, signal=35%
GO_POSITIVE_REGULATION_OF_ALPHA_BETA_T_CELL_PROLIFERATION	GO_POSITIVE_REGULATION_OF_ALPHA_BETA_T_CELL_PROLIFERATION		21	0.712199	1.53541	0.0748988	0.146184	0.965	8193	tags=67%, list=15%, signal=78%
GO_FIBRINOLYSIS	GO_FIBRINOLYSIS		26	0.651957	1.53523	0.0547667	0.145954	0.965	5862	tags=42%, list=11%, signal=47%
GO_POSITIVE_REGULATION_OF_GENE_EXPRESSION_EPIGENETIC	GO_POSITIVE_REGULATION_OF_GENE_EXPRESSION_EPIGENETIC		59	0.473915	1.53486	0.0501044	0.145925	0.966	6727	tags=37%, list=12%, signal=42%
GO_LEUKOCYTE_APOPTOTIC_PROCESS	GO_LEUKOCYTE_APOPTOTIC_PROCESS		108	0.475055	1.53467	0.0618557	0.145689	0.966	7555	tags=50%, list=14%, signal=58%
GO_ALPHA_BETA_T_CELL_DIFFERENTIATION	GO_ALPHA_BETA_T_CELL_DIFFERENTIATION		105	0.519541	1.53448	0.0836735	0.14552	0.966	5918	tags=40%, list=11%, signal=45%
GO_REGULATION_OF_ERBB_SIGNALING_PATHWAY	GO_REGULATION_OF_ERBB_SIGNALING_PATHWAY		94	0.430915	1.53315	0.0475248	0.1465	0.966	6138	tags=41%, list=11%, signal=47%
GO_POSITIVE_REGULATION_OF_VASCULAR_ENDOTHELIAL_CELL_PROLIFERATION	GO_POSITIVE_REGULATION_OF_VASCULAR_ENDOTHELIAL_CELL_PROLIFERATION		23	0.507938	1.53248	0.0307377	0.146744	0.966	6793	tags=39%, list=12%, signal=45%
GO_POSITIVE_REGULATION_OF_T_CELL_PROLIFERATION	GO_POSITIVE_REGULATION_OF_T_CELL_PROLIFERATION		100	0.544656	1.53227	0.105263	0.146532	0.966	7378	tags=56%, list=13%, signal=64%
GO_NEGATIVE_REGULATION_OF_INTERLEUKIN_10_PRODUCTION	GO_NEGATIVE_REGULATION_OF_INTERLEUKIN_10_PRODUCTION		21	0.618565	1.5317	0.0641283	0.14674	0.967	5805	tags=52%, list=10%, signal=58%
GO_MEMBRANE_INVAGINATION	GO_MEMBRANE_INVAGINATION		132	0.56633	1.52993	0.0993915	0.148202	0.968	9878	tags=68%, list=18%, signal=83%
GO_POSITIVE_REGULATION_OF_PHAGOCYTOSIS	GO_POSITIVE_REGULATION_OF_PHAGOCYTOSIS		66	0.499723	1.52967	0.0778443	0.148039	0.968	6514	tags=52%, list=12%, signal=58%
GO_NEGATIVE_REGULATION_OF_IMMUNE_EFFECTOR_PROCESS	GO_NEGATIVE_REGULATION_OF_IMMUNE_EFFECTOR_PROCESS		124	0.465204	1.52949	0.0404858	0.147841	0.968	6565	tags=46%, list=12%, signal=52%
GO_SUBSTRATE_DEPENDENT_CELL_MIGRATION	GO_SUBSTRATE_DEPENDENT_CELL_MIGRATION		28	0.534107	1.52947	0.0598456	0.147452	0.968	2329	tags=39%, list=4%, signal=41%
GO_POSITIVE_REGULATION_OF_RESPONSE_TO_ENDOPLASMIC_RETICULUM_STRESS	GO_POSITIVE_REGULATION_OF_RESPONSE_TO_ENDOPLASMIC_RETICULUM_STRESS		37	0.505547	1.52827	0.0591837	0.1482	0.968	5251	tags=41%, list=9%, signal=45%
GO_NEGATIVE_REGULATION_OF_RESPONSE_TO_WOUNDING	GO_NEGATIVE_REGULATION_OF_RESPONSE_TO_WOUNDING		92	0.454539	1.52802	0.0372549	0.148104	0.968	5862	tags=35%, list=11%, signal=39%
GO_POSITIVE_REGULATION_OF_VASCULAR_ENDOTHELIAL_GROWTH_FACTOR_PRODUCTION	GO_POSITIVE_REGULATION_OF_VASCULAR_ENDOTHELIAL_GROWTH_FACTOR_PRODUCTION		28	0.523868	1.52765	0.0508806	0.148126	0.968	8164	tags=57%, list=15%, signal=67%
GO_RESPONSE_TO_PROTOZOAN	GO_RESPONSE_TO_PROTOZOAN		27	0.635279	1.5262	0.0772358	0.149183	0.968	5411	tags=41%, list=10%, signal=45%
GO_CELL_AGING	GO_CELL_AGING		111	0.411723	1.52597	0.0466926	0.149049	0.968	6932	tags=39%, list=12%, signal=44%
GO_REGULATION_OF_AXONOGENESIS	GO_REGULATION_OF_AXONOGENESIS		186	0.424207	1.52591	0.0416667	0.148711	0.968	6426	tags=38%, list=12%, signal=42%
GO_AMYLOID_BETA_FORMATION	GO_AMYLOID_BETA_FORMATION		39	0.477633	1.5256	0.042	0.148636	0.968	3862	tags=38%, list=7%, signal=41%
GO_ZYMOGEN_ACTIVATION	GO_ZYMOGEN_ACTIVATION		58	0.481482	1.52512	0.0332031	0.148689	0.968	5810	tags=40%, list=10%, signal=44%
GO_SIGNAL_TRANSDUCTION_INVOLVED_IN_CELL_CYCLE_CHECKPOINT	GO_SIGNAL_TRANSDUCTION_INVOLVED_IN_CELL_CYCLE_CHECKPOINT		73	0.468446	1.52493	0.0642023	0.148471	0.968	5765	tags=38%, list=10%, signal=43%
GO_POSITIVE_REGULATION_OF_T_CELL_CYTOKINE_PRODUCTION	GO_POSITIVE_REGULATION_OF_T_CELL_CYTOKINE_PRODUCTION		20	0.594595	1.52424	0.06917	0.148764	0.968	7343	tags=65%, list=13%, signal=75%
GO_NEUTROPHIL_MIGRATION	GO_NEUTROPHIL_MIGRATION		118	0.500571	1.52372	0.0808679	0.148848	0.969	6299	tags=47%, list=11%, signal=53%
GO_EXPLORATION_BEHAVIOR	GO_EXPLORATION_BEHAVIOR		26	0.50814	1.523	0.0191205	0.149225	0.969	2868	tags=31%, list=5%, signal=32%
GO_GLUCOSAMINE_CONTAINING_COMPOUND_METABOLIC_PROCESS	GO_GLUCOSAMINE_CONTAINING_COMPOUND_METABOLIC_PROCESS		26	0.478371	1.52203	0.0339321	0.149855	0.969	5032	tags=42%, list=9%, signal=47%
GO_REGULATION_OF_LEUKOCYTE_APOPTOTIC_PROCESS	GO_REGULATION_OF_LEUKOCYTE_APOPTOTIC_PROCESS		86	0.493877	1.52161	0.0810811	0.149914	0.969	7555	tags=53%, list=14%, signal=62%
GO_MACROPHAGE_ACTIVATION	GO_MACROPHAGE_ACTIVATION		100	0.490913	1.52093	0.08	0.150264	0.97	7696	tags=51%, list=14%, signal=59%
GO_REGULATION_OF_ACTIN_FILAMENT_LENGTH	GO_REGULATION_OF_ACTIN_FILAMENT_LENGTH		189	0.402431	1.5204	0.0482625	0.15043	0.971	5766	tags=40%, list=10%, signal=44%
GO_POSITIVE_REGULATION_OF_CELL_KILLING	GO_POSITIVE_REGULATION_OF_CELL_KILLING		61	0.586492	1.52036	0.101449	0.15008	0.971	5889	tags=43%, list=11%, signal=48%
GO_NEGATIVE_REGULATION_OF_TUMOR_NECROSIS_FACTOR_SUPERFAMILY_CYTOKINE_PRODUCTION	GO_NEGATIVE_REGULATION_OF_TUMOR_NECROSIS_FACTOR_SUPERFAMILY_CYTOKINE_PRODUCTION		77	0.476109	1.51879	0.0851485	0.15123	0.971	4431	tags=32%, list=8%, signal=35%
GO_POSITIVE_REGULATION_OF_LEUKOCYTE_ADHESION_TO_VASCULAR_ENDOTHELIAL_CELL	GO_POSITIVE_REGULATION_OF_LEUKOCYTE_ADHESION_TO_VASCULAR_ENDOTHELIAL_CELL		20	0.627566	1.51807	0.0785855	0.151584	0.972	6346	tags=60%, list=11%, signal=68%
GO_HYPEROSMOTIC_RESPONSE	GO_HYPEROSMOTIC_RESPONSE		28	0.455602	1.51674	0.0291829	0.152456	0.972	3628	tags=36%, list=7%, signal=38%
GO_NEGATIVE_REGULATION_OF_CARTILAGE_DEVELOPMENT	GO_NEGATIVE_REGULATION_OF_CARTILAGE_DEVELOPMENT		29	0.539966	1.51665	0.0588235	0.152138	0.972	3299	tags=41%, list=6%, signal=44%
GO_POSITIVE_REGULATION_OF_PROTEIN_IMPORT	GO_POSITIVE_REGULATION_OF_PROTEIN_IMPORT		42	0.469612	1.51615	0.0537849	0.152265	0.972	5764	tags=36%, list=10%, signal=40%
GO_AMINOGLYCAN_CATABOLIC_PROCESS	GO_AMINOGLYCAN_CATABOLIC_PROCESS		67	0.447229	1.51439	0.0484496	0.153721	0.973	5714	tags=33%, list=10%, signal=37%
GO_REGULATION_OF_LYMPHOCYTE_MEDIATED_IMMUNITY	GO_REGULATION_OF_LYMPHOCYTE_MEDIATED_IMMUNITY		154	0.497356	1.51379	0.0949495	0.15394	0.974	6565	tags=47%, list=12%, signal=53%
GO_LYSOSOME_LOCALIZATION	GO_LYSOSOME_LOCALIZATION		75	0.441365	1.51354	0.0528455	0.153757	0.974	6058	tags=48%, list=11%, signal=54%
GO_CORTICAL_CYTOSKELETON_ORGANIZATION	GO_CORTICAL_CYTOSKELETON_ORGANIZATION		60	0.455813	1.51353	0.0532544	0.153374	0.974	6346	tags=52%, list=11%, signal=58%
GO_POSITIVE_REGULATION_OF_VIRAL_PROCESS	GO_POSITIVE_REGULATION_OF_VIRAL_PROCESS		107	0.436701	1.51218	0.0503018	0.154473	0.975	7583	tags=45%, list=14%, signal=52%
GO_ERBB2_SIGNALING_PATHWAY	GO_ERBB2_SIGNALING_PATHWAY		32	0.505667	1.51112	0.0607843	0.155193	0.975	2623	tags=34%, list=5%, signal=36%
GO_AMELOGENESIS	GO_AMELOGENESIS		24	0.502658	1.51033	0.0424242	0.155698	0.975	5407	tags=38%, list=10%, signal=42%
GO_POSITIVE_REGULATION_OF_LEUKOCYTE_PROLIFERATION	GO_POSITIVE_REGULATION_OF_LEUKOCYTE_PROLIFERATION		149	0.49465	1.51015	0.0981964	0.155508	0.975	7696	tags=50%, list=14%, signal=58%
GO_ALPHA_BETA_T_CELL_PROLIFERATION	GO_ALPHA_BETA_T_CELL_PROLIFERATION		36	0.594684	1.51	0.0997963	0.15528	0.975	6437	tags=50%, list=12%, signal=57%
GO_TUMOR_NECROSIS_FACTOR_SECRETION	GO_TUMOR_NECROSIS_FACTOR_SECRETION		46	0.467824	1.50997	0.0473373	0.154944	0.975	4431	tags=33%, list=8%, signal=35%
GO_NEGATIVE_REGULATION_OF_EXOCYTOSIS	GO_NEGATIVE_REGULATION_OF_EXOCYTOSIS		33	0.515132	1.50888	0.0466019	0.155637	0.975	6966	tags=58%, list=13%, signal=66%
GO_REGULATION_OF_CELL_CYCLE_G1_S_PHASE_TRANSITION	GO_REGULATION_OF_CELL_CYCLE_G1_S_PHASE_TRANSITION		194	0.390267	1.50879	0.0512334	0.155354	0.975	6115	tags=31%, list=11%, signal=35%
GO_DNA_STRAND_ELONGATION	GO_DNA_STRAND_ELONGATION		26	0.638016	1.50778	0.0824742	0.155979	0.975	7649	tags=69%, list=14%, signal=80%
GO_LOW_DENSITY_LIPOPROTEIN_PARTICLE_CLEARANCE	GO_LOW_DENSITY_LIPOPROTEIN_PARTICLE_CLEARANCE		39	0.459733	1.50754	0.037037	0.155807	0.975	6058	tags=41%, list=11%, signal=46%
GO_REGULATION_OF_MYELOID_LEUKOCYTE_MEDIATED_IMMUNITY	GO_REGULATION_OF_MYELOID_LEUKOCYTE_MEDIATED_IMMUNITY		58	0.501345	1.50683	0.0878243	0.156241	0.975	6514	tags=55%, list=12%, signal=62%
GO_EPITHELIAL_TUBE_BRANCHING_INVOLVED_IN_LUNG_MORPHOGENESIS	GO_EPITHELIAL_TUBE_BRANCHING_INVOLVED_IN_LUNG_MORPHOGENESIS		29	0.535126	1.50663	0.0513761	0.156079	0.975	6856	tags=38%, list=12%, signal=43%
GO_VIRAL_RNA_GENOME_REPLICATION	GO_VIRAL_RNA_GENOME_REPLICATION		35	0.503556	1.50545	0.0558767	0.156975	0.976	7112	tags=49%, list=13%, signal=56%
GO_B_CELL_PROLIFERATION	GO_B_CELL_PROLIFERATION		97	0.496201	1.50423	0.111332	0.157872	0.977	8657	tags=49%, list=16%, signal=59%
GO_POSITIVE_REGULATION_OF_DNA_BIOSYNTHETIC_PROCESS	GO_POSITIVE_REGULATION_OF_DNA_BIOSYNTHETIC_PROCESS		69	0.465786	1.5036	0.0965795	0.158107	0.977	7414	tags=54%, list=13%, signal=62%
GO_REGULATION_OF_LYMPHOCYTE_DIFFERENTIATION	GO_REGULATION_OF_LYMPHOCYTE_DIFFERENTIATION		180	0.471223	1.50331	0.0936255	0.15802	0.977	6443	tags=44%, list=12%, signal=49%
GO_NEGATIVE_REGULATION_OF_CHONDROCYTE_DIFFERENTIATION	GO_NEGATIVE_REGULATION_OF_CHONDROCYTE_DIFFERENTIATION		23	0.551904	1.50293	0.0712871	0.158044	0.977	3299	tags=43%, list=6%, signal=46%
GO_HISTONE_H3_K27_METHYLATION	GO_HISTONE_H3_K27_METHYLATION		21	0.54717	1.50258	0.0677618	0.158036	0.977	7315	tags=52%, list=13%, signal=60%
GO_MITOTIC_CELL_CYCLE_CHECKPOINT	GO_MITOTIC_CELL_CYCLE_CHECKPOINT		165	0.441656	1.50212	0.0695825	0.158135	0.977	5940	tags=41%, list=11%, signal=45%
GO_REGULATION_OF_LEUKOCYTE_ADHESION_TO_VASCULAR_ENDOTHELIAL_CELL	GO_REGULATION_OF_LEUKOCYTE_ADHESION_TO_VASCULAR_ENDOTHELIAL_CELL		33	0.54682	1.50146	0.0775194	0.158384	0.977	6346	tags=39%, list=11%, signal=44%
GO_POSITIVE_REGULATION_OF_INTERFERON_ALPHA_PRODUCTION	GO_POSITIVE_REGULATION_OF_INTERFERON_ALPHA_PRODUCTION		20	0.613251	1.50129	0.0833333	0.158167	0.977	5095	tags=45%, list=9%, signal=50%
GO_SEMI_LUNAR_VALVE_DEVELOPMENT	GO_SEMI_LUNAR_VALVE_DEVELOPMENT		37	0.535755	1.50003	0.0797546	0.159071	0.977	3163	tags=41%, list=6%, signal=43%
GO_REGULATION_OF_PROTEIN_LOCALIZATION_TO_PLASMA_MEMBRANE	GO_REGULATION_OF_PROTEIN_LOCALIZATION_TO_PLASMA_MEMBRANE		101	0.40354	1.49985	0.0326923	0.158849	0.977	6346	tags=41%, list=11%, signal=46%
GO_REGULATION_OF_NEUTROPHIL_MIGRATION	GO_REGULATION_OF_NEUTROPHIL_MIGRATION		41	0.537998	1.49894	0.0994264	0.159379	0.977	5058	tags=51%, list=9%, signal=56%
GO_OSTEOCLAST_DIFFERENTIATION	GO_OSTEOCLAST_DIFFERENTIATION		98	0.453861	1.49874	0.0442656	0.15922	0.978	5565	tags=40%, list=10%, signal=44%
GO_NEGATIVE_REGULATION_OF_CELL_CELL_ADHESION	GO_NEGATIVE_REGULATION_OF_CELL_CELL_ADHESION		189	0.420852	1.49769	0.0537428	0.160011	0.98	4970	tags=34%, list=9%, signal=38%
GO_POSITIVE_REGULATION_OF_MACROPHAGE_ACTIVATION	GO_POSITIVE_REGULATION_OF_MACROPHAGE_ACTIVATION		28	0.552475	1.49755	0.0940499	0.159735	0.98	10804	tags=68%, list=19%, signal=84%
GO_NEGATIVE_REGULATION_OF_REACTIVE_OXYGEN_SPECIES_BIOSYNTHETIC_PROCESS	GO_NEGATIVE_REGULATION_OF_REACTIVE_OXYGEN_SPECIES_BIOSYNTHETIC_PROCESS		37	0.448456	1.49755	0.040619	0.159363	0.98	8541	tags=49%, list=15%, signal=57%
GO_REGULATION_OF_AMYLOID_PRECURSOR_PROTEIN_CATABOLIC_PROCESS	GO_REGULATION_OF_AMYLOID_PRECURSOR_PROTEIN_CATABOLIC_PROCESS		40	0.449397	1.49683	0.0544355	0.159688	0.98	3862	tags=35%, list=7%, signal=38%
GO_POSITIVE_REGULATION_OF_MYELOID_LEUKOCYTE_DIFFERENTIATION	GO_POSITIVE_REGULATION_OF_MYELOID_LEUKOCYTE_DIFFERENTIATION		58	0.481337	1.49643	0.0628684	0.159694	0.98	7378	tags=47%, list=13%, signal=54%
GO_REGULATION_OF_AMYLOID_BETA_FORMATION	GO_REGULATION_OF_AMYLOID_BETA_FORMATION		33	0.479517	1.49635	0.060241	0.15943	0.98	3862	tags=39%, list=7%, signal=42%
GO_ALPHA_BETA_T_CELL_ACTIVATION	GO_ALPHA_BETA_T_CELL_ACTIVATION		145	0.499393	1.49612	0.11609	0.159288	0.98	6437	tags=40%, list=12%, signal=45%
GO_POSITIVE_REGULATION_OF_GRANULOCYTE_CHEMOTAXIS	GO_POSITIVE_REGULATION_OF_GRANULOCYTE_CHEMOTAXIS		29	0.531982	1.49519	0.0820312	0.159844	0.98	5058	tags=48%, list=9%, signal=53%
GO_REGULATION_OF_B_CELL_PROLIFERATION	GO_REGULATION_OF_B_CELL_PROLIFERATION		62	0.53986	1.49503	0.115538	0.159657	0.98	7696	tags=53%, list=14%, signal=62%
GO_MYOBLAST_FUSION	GO_MYOBLAST_FUSION		45	0.48163	1.49474	0.050813	0.159615	0.98	5828	tags=40%, list=11%, signal=45%
GO_SPHINGOLIPID_BIOSYNTHETIC_PROCESS	GO_SPHINGOLIPID_BIOSYNTHETIC_PROCESS		107	0.406411	1.49382	0.0549898	0.160081	0.98	5829	tags=36%, list=11%, signal=40%
GO_AMYLOID_BETA_CLEARANCE	GO_AMYLOID_BETA_CLEARANCE		35	0.495462	1.49327	0.0684105	0.160238	0.981	6346	tags=57%, list=11%, signal=64%
GO_REGULATION_OF_CELL_PROJECTION_ASSEMBLY	GO_REGULATION_OF_CELL_PROJECTION_ASSEMBLY		183	0.386771	1.49314	0.0423077	0.16003	0.981	3978	tags=33%, list=7%, signal=36%
GO_NEGATIVE_REGULATION_OF_LEUKOCYTE_DIFFERENTIATION	GO_NEGATIVE_REGULATION_OF_LEUKOCYTE_DIFFERENTIATION		104	0.431547	1.49197	0.0547945	0.160886	0.982	4431	tags=35%, list=8%, signal=38%
GO_REGULATION_OF_DEFENSE_RESPONSE_TO_VIRUS_BY_VIRUS	GO_REGULATION_OF_DEFENSE_RESPONSE_TO_VIRUS_BY_VIRUS		29	0.537495	1.49148	0.0707269	0.161041	0.982	7378	tags=59%, list=13%, signal=68%
GO_REGULATION_OF_T_CELL_DIFFERENTIATION	GO_REGULATION_OF_T_CELL_DIFFERENTIATION		149	0.481571	1.49083	0.0921844	0.161332	0.982	6443	tags=44%, list=12%, signal=49%
GO_CD4_POSITIVE_ALPHA_BETA_T_CELL_CYTOKINE_PRODUCTION	GO_CD4_POSITIVE_ALPHA_BETA_T_CELL_CYTOKINE_PRODUCTION		23	0.546078	1.49054	0.07393	0.161261	0.982	6694	tags=48%, list=12%, signal=54%
GO_REGULATION_OF_NEURON_PROJECTION_REGENERATION	GO_REGULATION_OF_NEURON_PROJECTION_REGENERATION		32	0.499188	1.4896	0.0661479	0.161827	0.982	8354	tags=41%, list=15%, signal=48%
GO_POSITIVE_REGULATION_OF_REACTIVE_OXYGEN_SPECIES_METABOLIC_PROCESS	GO_POSITIVE_REGULATION_OF_REACTIVE_OXYGEN_SPECIES_METABOLIC_PROCESS		104	0.400332	1.48876	0.0365112	0.16242	0.983	6346	tags=34%, list=11%, signal=38%
GO_POSITIVE_REGULATION_OF_MYELOID_LEUKOCYTE_MEDIATED_IMMUNITY	GO_POSITIVE_REGULATION_OF_MYELOID_LEUKOCYTE_MEDIATED_IMMUNITY		34	0.49434	1.48869	0.0724346	0.162113	0.983	5634	tags=53%, list=10%, signal=59%
GO_NEGATIVE_REGULATION_OF_PHAGOCYTOSIS	GO_NEGATIVE_REGULATION_OF_PHAGOCYTOSIS		22	0.523318	1.4882	0.0564516	0.162248	0.983	8094	tags=59%, list=15%, signal=69%
GO_POSITIVE_REGULATION_OF_INSULIN_SECRETION_INVOLVED_IN_CELLULAR_RESPONSE_TO_GLUCOSE_STIMULUS	GO_POSITIVE_REGULATION_OF_INSULIN_SECRETION_INVOLVED_IN_CELLULAR_RESPONSE_TO_GLUCOSE_STIMULUS		34	0.456648	1.48758	0.0287474	0.162591	0.983	6768	tags=41%, list=12%, signal=47%
GO_POSITIVE_REGULATION_OF_CELL_CYCLE_ARREST	GO_POSITIVE_REGULATION_OF_CELL_CYCLE_ARREST		80	0.442834	1.4833	0.0544355	0.16666	0.984	8657	tags=44%, list=16%, signal=52%
GO_AMYLOID_PRECURSOR_PROTEIN_CATABOLIC_PROCESS	GO_AMYLOID_PRECURSOR_PROTEIN_CATABOLIC_PROCESS		50	0.43254	1.48293	0.058	0.166619	0.984	3862	tags=32%, list=7%, signal=34%
GO_PHOSPHATIDYLSERINE_METABOLIC_PROCESS	GO_PHOSPHATIDYLSERINE_METABOLIC_PROCESS		34	0.480978	1.48232	0.0453608	0.16687	0.984	5410	tags=38%, list=10%, signal=42%
GO_MODIFICATION_OF_SYNAPTIC_STRUCTURE	GO_MODIFICATION_OF_SYNAPTIC_STRUCTURE		24	0.525254	1.48209	0.0683594	0.16673	0.984	5159	tags=54%, list=9%, signal=60%
GO_ANTIGEN_PROCESSING_AND_PRESENTATION_OF_PEPTIDE_OR_POLYSACCHARIDE_ANTIGEN_VIA_MHC_CLASS_II	GO_ANTIGEN_PROCESSING_AND_PRESENTATION_OF_PEPTIDE_OR_POLYSACCHARIDE_ANTIGEN_VIA_MHC_CLASS_II		102	0.453078	1.48149	0.0876494	0.167008	0.984	5976	tags=45%, list=11%, signal=50%
GO_REGULATION_OF_NECROTIC_CELL_DEATH	GO_REGULATION_OF_NECROTIC_CELL_DEATH		35	0.43578	1.48123	0.0362173	0.166918	0.984	4788	tags=34%, list=9%, signal=38%
GO_POSITIVE_REGULATION_OF_DEFENSE_RESPONSE_TO_VIRUS_BY_HOST	GO_POSITIVE_REGULATION_OF_DEFENSE_RESPONSE_TO_VIRUS_BY_HOST		29	0.561601	1.48089	0.0912698	0.16689	0.984	5763	tags=48%, list=10%, signal=54%
GO_FC_RECEPTOR_MEDIATED_STIMULATORY_SIGNALING_PATHWAY	GO_FC_RECEPTOR_MEDIATED_STIMULATORY_SIGNALING_PATHWAY		144	0.545664	1.48056	0.130346	0.166885	0.984	7906	tags=56%, list=14%, signal=65%
GO_CELLULAR_RESPONSE_TO_GROWTH_HORMONE_STIMULUS	GO_CELLULAR_RESPONSE_TO_GROWTH_HORMONE_STIMULUS		25	0.549292	1.48015	0.0834952	0.166956	0.985	1696	tags=32%, list=3%, signal=33%
GO_GLIAL_CELL_PROLIFERATION	GO_GLIAL_CELL_PROLIFERATION		49	0.441424	1.4801	0.0532319	0.166635	0.985	6944	tags=41%, list=13%, signal=47%
GO_REGULATION_OF_VIRAL_TRANSCRIPTION	GO_REGULATION_OF_VIRAL_TRANSCRIPTION		65	0.465041	1.47933	0.0869565	0.167156	0.985	5225	tags=34%, list=9%, signal=37%
GO_POSITIVE_REGULATION_OF_TUMOR_NECROSIS_FACTOR_SECRETION	GO_POSITIVE_REGULATION_OF_TUMOR_NECROSIS_FACTOR_SECRETION		26	0.522954	1.47875	0.0707457	0.167399	0.985	4032	tags=35%, list=7%, signal=37%
GO_POSITIVE_REGULATION_OF_INTERLEUKIN_12_PRODUCTION	GO_POSITIVE_REGULATION_OF_INTERLEUKIN_12_PRODUCTION		35	0.57282	1.47831	0.102823	0.16748	0.985	5911	tags=43%, list=11%, signal=48%
GO_INNATE_IMMUNE_RESPONSE_ACTIVATING_SIGNAL_TRANSDUCTION	GO_INNATE_IMMUNE_RESPONSE_ACTIVATING_SIGNAL_TRANSDUCTION		116	0.43941	1.47821	0.0686275	0.167233	0.985	8826	tags=43%, list=16%, signal=51%
GO_REGULATION_OF_GLIOGENESIS	GO_REGULATION_OF_GLIOGENESIS		126	0.395211	1.47787	0.041502	0.167169	0.985	6944	tags=39%, list=13%, signal=44%
GO_HUMORAL_IMMUNE_RESPONSE_MEDIATED_BY_CIRCULATING_IMMUNOGLOBULIN	GO_HUMORAL_IMMUNE_RESPONSE_MEDIATED_BY_CIRCULATING_IMMUNOGLOBULIN		144	0.629384	1.47719	0.128571	0.167531	0.986	11373	tags=76%, list=21%, signal=96%
GO_NEGATIVE_REGULATION_OF_INTERLEUKIN_1_PRODUCTION	GO_NEGATIVE_REGULATION_OF_INTERLEUKIN_1_PRODUCTION		44	0.493431	1.47697	0.0679612	0.167418	0.986	6665	tags=36%, list=12%, signal=41%
GO_RESPONSE_TO_GROWTH_HORMONE	GO_RESPONSE_TO_GROWTH_HORMONE		39	0.472925	1.47656	0.0539499	0.167471	0.986	5251	tags=36%, list=9%, signal=40%
GO_PULMONARY_VALVE_DEVELOPMENT	GO_PULMONARY_VALVE_DEVELOPMENT		21	0.574375	1.47653	0.0961924	0.167146	0.986	3163	tags=43%, list=6%, signal=45%
GO_POSTSYNAPSE_ORGANIZATION	GO_POSTSYNAPSE_ORGANIZATION		173	0.397685	1.47387	0.0580271	0.169628	0.986	6011	tags=35%, list=11%, signal=39%
GO_POSITIVE_REGULATION_OF_CYTOKINE_SECRETION	GO_POSITIVE_REGULATION_OF_CYTOKINE_SECRETION		67	0.453363	1.47345	0.0817121	0.16968	0.986	6346	tags=43%, list=11%, signal=49%
GO_KERATINOCYTE_PROLIFERATION	GO_KERATINOCYTE_PROLIFERATION		49	0.472752	1.47296	0.054902	0.169806	0.986	2887	tags=27%, list=5%, signal=28%
GO_REGULATION_OF_SISTER_CHROMATID_COHESION	GO_REGULATION_OF_SISTER_CHROMATID_COHESION		22	0.581121	1.47276	0.0747475	0.169634	0.986	6036	tags=45%, list=11%, signal=51%
GO_POSITIVE_REGULATION_OF_NIK_NF_KAPPAB_SIGNALING	GO_POSITIVE_REGULATION_OF_NIK_NF_KAPPAB_SIGNALING		80	0.449213	1.47241	0.0628684	0.16962	0.986	6346	tags=44%, list=11%, signal=49%
GO_POSITIVE_REGULATION_OF_NEUTROPHIL_MIGRATION	GO_POSITIVE_REGULATION_OF_NEUTROPHIL_MIGRATION		31	0.542888	1.47178	0.0901961	0.169855	0.986	5058	tags=52%, list=9%, signal=57%
GO_PLACENTA_BLOOD_VESSEL_DEVELOPMENT	GO_PLACENTA_BLOOD_VESSEL_DEVELOPMENT		35	0.450688	1.47038	0.0497018	0.170859	0.986	3989	tags=29%, list=7%, signal=31%
GO_DEFENSE_RESPONSE_TO_GRAM_POSITIVE_BACTERIUM	GO_DEFENSE_RESPONSE_TO_GRAM_POSITIVE_BACTERIUM		99	0.459004	1.47018	0.0708661	0.170695	0.986	8636	tags=39%, list=16%, signal=47%
GO_ACTIVATION_OF_CYSTEINE_TYPE_ENDOPEPTIDASE_ACTIVITY_INVOLVED_IN_APOPTOTIC_PROCESS	GO_ACTIVATION_OF_CYSTEINE_TYPE_ENDOPEPTIDASE_ACTIVITY_INVOLVED_IN_APOPTOTIC_PROCESS		85	0.416548	1.46873	0.0433071	0.171796	0.986	6346	tags=40%, list=11%, signal=45%
GO_NEUTROPHIL_CHEMOTAXIS	GO_NEUTROPHIL_CHEMOTAXIS		99	0.492627	1.46861	0.106	0.171595	0.986	6299	tags=47%, list=11%, signal=53%
GO_NEGATIVE_REGULATION_OF_SIGNAL_TRANSDUCTION_IN_ABSENCE_OF_LIGAND	GO_NEGATIVE_REGULATION_OF_SIGNAL_TRANSDUCTION_IN_ABSENCE_OF_LIGAND		35	0.461607	1.46748	0.0562016	0.17247	0.986	8649	tags=49%, list=16%, signal=58%
GO_NEGATIVE_REGULATION_OF_CELL_SUBSTRATE_ADHESION	GO_NEGATIVE_REGULATION_OF_CELL_SUBSTRATE_ADHESION		63	0.440724	1.46709	0.0770751	0.172478	0.986	5736	tags=46%, list=10%, signal=51%
GO_REGULATION_OF_ANTIGEN_RECEPTOR_MEDIATED_SIGNALING_PATHWAY	GO_REGULATION_OF_ANTIGEN_RECEPTOR_MEDIATED_SIGNALING_PATHWAY		66	0.539891	1.46667	0.119097	0.1726	0.986	6003	tags=39%, list=11%, signal=44%
GO_EPIDERMAL_GROWTH_FACTOR_RECEPTOR_SIGNALING_PATHWAY	GO_EPIDERMAL_GROWTH_FACTOR_RECEPTOR_SIGNALING_PATHWAY		120	0.424377	1.46657	0.0834952	0.172341	0.986	6340	tags=38%, list=11%, signal=43%
GO_RIBONUCLEOSIDE_MONOPHOSPHATE_BIOSYNTHETIC_PROCESS	GO_RIBONUCLEOSIDE_MONOPHOSPHATE_BIOSYNTHETIC_PROCESS		34	0.478988	1.46627	0.0697168	0.172296	0.986	3716	tags=38%, list=7%, signal=41%
GO_REGULATION_OF_WOUND_HEALING	GO_REGULATION_OF_WOUND_HEALING		146	0.412145	1.46608	0.0484496	0.172184	0.986	5862	tags=36%, list=11%, signal=40%
GO_NEGATIVE_REGULATION_OF_VIRAL_TRANSCRIPTION	GO_NEGATIVE_REGULATION_OF_VIRAL_TRANSCRIPTION		27	0.502822	1.46603	0.0626263	0.171887	0.986	3386	tags=26%, list=6%, signal=28%
GO_DNA_BIOSYNTHETIC_PROCESS	GO_DNA_BIOSYNTHETIC_PROCESS		190	0.404273	1.46561	0.0992063	0.171963	0.986	6846	tags=42%, list=12%, signal=47%
GO_SPHINGOLIPID_METABOLIC_PROCESS	GO_SPHINGOLIPID_METABOLIC_PROCESS		163	0.381535	1.46542	0.0567515	0.171826	0.986	5399	tags=33%, list=10%, signal=36%
GO_REGULATION_OF_HUMORAL_IMMUNE_RESPONSE	GO_REGULATION_OF_HUMORAL_IMMUNE_RESPONSE		133	0.563549	1.4653	0.131579	0.171649	0.987	11467	tags=69%, list=21%, signal=87%
GO_TELOMERE_MAINTENANCE_VIA_TELOMERE_LENGTHENING	GO_TELOMERE_MAINTENANCE_VIA_TELOMERE_LENGTHENING		80	0.480752	1.46468	0.115619	0.171914	0.987	6846	tags=49%, list=12%, signal=56%
GO_APICAL_JUNCTION_ASSEMBLY	GO_APICAL_JUNCTION_ASSEMBLY		85	0.422283	1.46427	0.0826923	0.172006	0.987	3271	tags=34%, list=6%, signal=36%
GO_NEGATIVE_REGULATION_OF_AXON_GUIDANCE	GO_NEGATIVE_REGULATION_OF_AXON_GUIDANCE		28	0.520143	1.46393	0.0658683	0.172023	0.987	6100	tags=50%, list=11%, signal=56%
GO_NEGATIVE_REGULATION_OF_INTERLEUKIN_17_PRODUCTION	GO_NEGATIVE_REGULATION_OF_INTERLEUKIN_17_PRODUCTION		21	0.506488	1.46331	0.0767677	0.172274	0.987	1900	tags=24%, list=3%, signal=25%
GO_REGULATION_OF_CELL_SIZE	GO_REGULATION_OF_CELL_SIZE		181	0.392212	1.4624	0.0518962	0.172841	0.987	5812	tags=33%, list=10%, signal=37%
GO_CELL_DEATH_IN_RESPONSE_TO_OXIDATIVE_STRESS	GO_CELL_DEATH_IN_RESPONSE_TO_OXIDATIVE_STRESS		85	0.408449	1.4619	0.0434783	0.173023	0.988	5418	tags=38%, list=10%, signal=42%
GO_REGULATION_OF_CELLULAR_RESPONSE_TO_TRANSFORMING_GROWTH_FACTOR_BETA_STIMULUS	GO_REGULATION_OF_CELLULAR_RESPONSE_TO_TRANSFORMING_GROWTH_FACTOR_BETA_STIMULUS		127	0.400517	1.46147	0.0617978	0.173109	0.988	5342	tags=32%, list=10%, signal=36%
GO_INTERACTION_WITH_SYMBIONT	GO_INTERACTION_WITH_SYMBIONT		93	0.39359	1.46093	0.0425963	0.173302	0.988	7464	tags=33%, list=13%, signal=38%
GO_UNSATURATED_FATTY_ACID_BIOSYNTHETIC_PROCESS	GO_UNSATURATED_FATTY_ACID_BIOSYNTHETIC_PROCESS		59	0.415164	1.46019	0.0615079	0.173727	0.988	7183	tags=42%, list=13%, signal=49%
GO_ESTABLISHMENT_OF_SPINDLE_ORIENTATION	GO_ESTABLISHMENT_OF_SPINDLE_ORIENTATION		36	0.495581	1.45902	0.0916335	0.174612	0.988	8398	tags=53%, list=15%, signal=62%
GO_POSITIVE_REGULATION_OF_CANONICAL_WNT_SIGNALING_PATHWAY	GO_POSITIVE_REGULATION_OF_CANONICAL_WNT_SIGNALING_PATHWAY		148	0.402932	1.45866	0.0674603	0.17468	0.988	6154	tags=34%, list=11%, signal=39%
GO_REGULATION_OF_T_CELL_CYTOKINE_PRODUCTION	GO_REGULATION_OF_T_CELL_CYTOKINE_PRODUCTION		32	0.525245	1.45735	0.0958904	0.175775	0.988	6338	tags=56%, list=11%, signal=63%
GO_RESPONSE_TO_INTERFERON_BETA	GO_RESPONSE_TO_INTERFERON_BETA		31	0.550502	1.45665	0.114173	0.176138	0.988	8633	tags=52%, list=16%, signal=61%
GO_POSITIVE_REGULATION_OF_WNT_SIGNALING_PATHWAY	GO_POSITIVE_REGULATION_OF_WNT_SIGNALING_PATHWAY		181	0.394219	1.45567	0.0634921	0.176747	0.988	6154	tags=34%, list=11%, signal=38%
GO_CELL_DIFFERENTIATION_INVOLVED_IN_EMBRYONIC_PLACENTA_DEVELOPMENT	GO_CELL_DIFFERENTIATION_INVOLVED_IN_EMBRYONIC_PLACENTA_DEVELOPMENT		26	0.490293	1.45377	0.0792079	0.178288	0.989	5969	tags=38%, list=11%, signal=43%
GO_ADHERENS_JUNCTION_ORGANIZATION	GO_ADHERENS_JUNCTION_ORGANIZATION		67	0.461661	1.45225	0.0896414	0.179552	0.989	4649	tags=42%, list=8%, signal=46%
GO_ERBB_SIGNALING_PATHWAY	GO_ERBB_SIGNALING_PATHWAY		142	0.408939	1.4522	0.077821	0.179253	0.989	5866	tags=36%, list=11%, signal=40%
GO_POSITIVE_REGULATION_OF_LEUKOCYTE_MIGRATION	GO_POSITIVE_REGULATION_OF_LEUKOCYTE_MIGRATION		142	0.431373	1.4518	0.0992218	0.179318	0.989	5159	tags=42%, list=9%, signal=46%
GO_CELLULAR_RESPONSE_TO_RETINOIC_ACID	GO_CELLULAR_RESPONSE_TO_RETINOIC_ACID		67	0.426405	1.45161	0.0716981	0.179148	0.989	5389	tags=36%, list=10%, signal=40%
GO_NEGATIVE_REGULATION_OF_SYNAPSE_ORGANIZATION	GO_NEGATIVE_REGULATION_OF_SYNAPSE_ORGANIZATION		25	0.493571	1.45019	0.0631164	0.180296	0.989	5911	tags=40%, list=11%, signal=45%
GO_SPINDLE_LOCALIZATION	GO_SPINDLE_LOCALIZATION		50	0.502174	1.44957	0.108652	0.180579	0.989	8398	tags=56%, list=15%, signal=66%
GO_LIVER_REGENERATION	GO_LIVER_REGENERATION		32	0.482125	1.4486	0.0501002	0.181251	0.99	7026	tags=50%, list=13%, signal=57%
GO_INFLAMMATORY_CELL_APOPTOTIC_PROCESS	GO_INFLAMMATORY_CELL_APOPTOTIC_PROCESS		22	0.521332	1.44806	0.0955285	0.181472	0.99	6493	tags=45%, list=12%, signal=51%
GO_NEGATIVE_REGULATION_OF_DENDRITE_DEVELOPMENT	GO_NEGATIVE_REGULATION_OF_DENDRITE_DEVELOPMENT		28	0.499735	1.44797	0.0885827	0.181208	0.99	5765	tags=50%, list=10%, signal=56%
GO_SIGNAL_TRANSDUCTION_IN_RESPONSE_TO_DNA_DAMAGE	GO_SIGNAL_TRANSDUCTION_IN_RESPONSE_TO_DNA_DAMAGE		132	0.407267	1.44619	0.0892193	0.182785	0.99	5765	tags=35%, list=10%, signal=39%
GO_NEGATIVE_REGULATION_OF_T_CELL_RECEPTOR_SIGNALING_PATHWAY	GO_NEGATIVE_REGULATION_OF_T_CELL_RECEPTOR_SIGNALING_PATHWAY		23	0.547632	1.44617	0.114688	0.182434	0.99	7598	tags=57%, list=14%, signal=65%
GO_CELLULAR_RESPONSE_TO_HYDROGEN_PEROXIDE	GO_CELLULAR_RESPONSE_TO_HYDROGEN_PEROXIDE		92	0.386053	1.44555	0.0545073	0.182712	0.99	5411	tags=38%, list=10%, signal=42%
GO_NEGATIVE_REGULATION_OF_TOLL_LIKE_RECEPTOR_SIGNALING_PATHWAY	GO_NEGATIVE_REGULATION_OF_TOLL_LIKE_RECEPTOR_SIGNALING_PATHWAY		42	0.475395	1.44524	0.0984556	0.182695	0.99	5172	tags=36%, list=9%, signal=39%
GO_PROTEIN_LOCALIZATION_TO_CHROMOSOME_TELOMERIC_REGION	GO_PROTEIN_LOCALIZATION_TO_CHROMOSOME_TELOMERIC_REGION		29	0.55625	1.44505	0.113924	0.182506	0.99	8657	tags=62%, list=16%, signal=74%
GO_ANTIGEN_PROCESSING_AND_PRESENTATION_OF_PEPTIDE_ANTIGEN	GO_ANTIGEN_PROCESSING_AND_PRESENTATION_OF_PEPTIDE_ANTIGEN		192	0.431137	1.44457	0.123077	0.182657	0.99	6312	tags=42%, list=11%, signal=47%
GO_T_CELL_CYTOKINE_PRODUCTION	GO_T_CELL_CYTOKINE_PRODUCTION		43	0.488709	1.44423	0.0970297	0.18264	0.99	6694	tags=51%, list=12%, signal=58%
GO_REGULATION_OF_PROTEIN_EXPORT_FROM_NUCLEUS	GO_REGULATION_OF_PROTEIN_EXPORT_FROM_NUCLEUS		41	0.453551	1.44413	0.0910853	0.182389	0.99	6297	tags=41%, list=11%, signal=47%
GO_DETECTION_OF_BIOTIC_STIMULUS	GO_DETECTION_OF_BIOTIC_STIMULUS		36	0.525553	1.44408	0.125498	0.182084	0.99	5959	tags=53%, list=11%, signal=59%
GO_CELLULAR_RESPONSE_TO_GAMMA_RADIATION	GO_CELLULAR_RESPONSE_TO_GAMMA_RADIATION		30	0.455613	1.44321	0.0878243	0.182663	0.99	4207	tags=37%, list=8%, signal=40%
GO_RESPONSE_TO_HYDROGEN_PEROXIDE	GO_RESPONSE_TO_HYDROGEN_PEROXIDE		138	0.370798	1.44293	0.0524194	0.182648	0.99	5411	tags=34%, list=10%, signal=38%
GO_RESPONSE_TO_CHEMOKINE	GO_RESPONSE_TO_CHEMOKINE		95	0.512801	1.44282	0.12253	0.18242	0.99	6190	tags=42%, list=11%, signal=47%
GO_BASEMENT_MEMBRANE_ORGANIZATION	GO_BASEMENT_MEMBRANE_ORGANIZATION		30	0.494583	1.44152	0.101504	0.183355	0.99	4788	tags=33%, list=9%, signal=36%
GO_REGULATION_OF_RHO_PROTEIN_SIGNAL_TRANSDUCTION	GO_REGULATION_OF_RHO_PROTEIN_SIGNAL_TRANSDUCTION		86	0.436442	1.44041	0.094	0.184262	0.99	6054	tags=40%, list=11%, signal=44%
GO_OVULATION_CYCLE	GO_OVULATION_CYCLE		69	0.433341	1.43985	0.0670498	0.184544	0.99	5551	tags=39%, list=10%, signal=43%
GO_POSITIVE_REGULATION_OF_MYOTUBE_DIFFERENTIATION	GO_POSITIVE_REGULATION_OF_MYOTUBE_DIFFERENTIATION		36	0.52253	1.43905	0.0886076	0.185057	0.99	5828	tags=39%, list=11%, signal=43%
GO_TELENCEPHALON_GLIAL_CELL_MIGRATION	GO_TELENCEPHALON_GLIAL_CELL_MIGRATION		24	0.514609	1.43875	0.0994036	0.18502	0.99	3611	tags=38%, list=7%, signal=40%
GO_DETECTION_OF_EXTERNAL_BIOTIC_STIMULUS	GO_DETECTION_OF_EXTERNAL_BIOTIC_STIMULUS		24	0.59046	1.43865	0.120163	0.184763	0.99	5959	tags=63%, list=11%, signal=70%
GO_NEGATIVE_REGULATION_OF_INFLAMMATORY_RESPONSE	GO_NEGATIVE_REGULATION_OF_INFLAMMATORY_RESPONSE		182	0.387611	1.43848	0.0816733	0.18459	0.99	8955	tags=43%, list=16%, signal=51%
GO_RIBOSOMAL_LARGE_SUBUNIT_BIOGENESIS	GO_RIBOSOMAL_LARGE_SUBUNIT_BIOGENESIS		74	0.517241	1.43768	0.161826	0.185161	0.99	6799	tags=43%, list=12%, signal=49%
GO_REGULATION_OF_RECEPTOR_BINDING	GO_REGULATION_OF_RECEPTOR_BINDING		27	0.473924	1.43714	0.064257	0.185376	0.99	5519	tags=41%, list=10%, signal=45%
GO_POSITIVE_REGULATION_OF_G1_S_TRANSITION_OF_MITOTIC_CELL_CYCLE	GO_POSITIVE_REGULATION_OF_G1_S_TRANSITION_OF_MITOTIC_CELL_CYCLE		47	0.429589	1.43528	0.0806452	0.186984	0.99	3887	tags=28%, list=7%, signal=30%
GO_SYMPATHETIC_NERVOUS_SYSTEM_DEVELOPMENT	GO_SYMPATHETIC_NERVOUS_SYSTEM_DEVELOPMENT		21	0.512811	1.43527	0.0733198	0.186651	0.99	2379	tags=24%, list=4%, signal=25%
GO_NUCLEAR_TRANSCRIBED_MRNA_CATABOLIC_PROCESS_NONSENSE_MEDIATED_DECAY	GO_NUCLEAR_TRANSCRIBED_MRNA_CATABOLIC_PROCESS_NONSENSE_MEDIATED_DECAY		120	0.569933	1.43455	0.171247	0.187052	0.99	8571	tags=61%, list=15%, signal=72%
GO_MAMMARY_GLAND_MORPHOGENESIS	GO_MAMMARY_GLAND_MORPHOGENESIS		45	0.448676	1.43428	0.0725191	0.187003	0.99	5105	tags=47%, list=9%, signal=51%
GO_NEGATIVE_REGULATION_OF_WOUND_HEALING	GO_NEGATIVE_REGULATION_OF_WOUND_HEALING		77	0.440226	1.43409	0.0788462	0.186855	0.99	5862	tags=35%, list=11%, signal=39%
GO_NEGATIVE_REGULATION_OF_I_KAPPAB_KINASE_NF_KAPPAB_SIGNALING	GO_NEGATIVE_REGULATION_OF_I_KAPPAB_KINASE_NF_KAPPAB_SIGNALING		50	0.447457	1.43396	0.0804829	0.186635	0.99	5159	tags=38%, list=9%, signal=42%
GO_REGULATION_OF_PROGRAMMED_NECROTIC_CELL_DEATH	GO_REGULATION_OF_PROGRAMMED_NECROTIC_CELL_DEATH		25	0.478628	1.43379	0.0737052	0.18645	0.99	4788	tags=40%, list=9%, signal=44%
GO_MITOTIC_SPINDLE_ASSEMBLY	GO_MITOTIC_SPINDLE_ASSEMBLY		65	0.476728	1.43342	0.115308	0.186493	0.99	5507	tags=35%, list=10%, signal=39%
GO_NEGATIVE_CHEMOTAXIS	GO_NEGATIVE_CHEMOTAXIS		47	0.468857	1.43283	0.0756972	0.186829	0.99	6100	tags=40%, list=11%, signal=45%
GO_BRANCHING_INVOLVED_IN_MAMMARY_GLAND_DUCT_MORPHOGENESIS	GO_BRANCHING_INVOLVED_IN_MAMMARY_GLAND_DUCT_MORPHOGENESIS		24	0.497988	1.43201	0.0975143	0.187374	0.99	6944	tags=58%, list=13%, signal=67%
GO_NEGATIVE_REGULATION_OF_TELOMERE_MAINTENANCE_VIA_TELOMERE_LENGTHENING	GO_NEGATIVE_REGULATION_OF_TELOMERE_MAINTENANCE_VIA_TELOMERE_LENGTHENING		26	0.545138	1.432	0.142857	0.187037	0.99	4745	tags=42%, list=9%, signal=46%
GO_NEGATIVE_REGULATION_OF_PROTEIN_MODIFICATION_BY_SMALL_PROTEIN_CONJUGATION_OR_REMOVAL	GO_NEGATIVE_REGULATION_OF_PROTEIN_MODIFICATION_BY_SMALL_PROTEIN_CONJUGATION_OR_REMOVAL		91	0.390836	1.4314	0.0758483	0.18731	0.99	4172	tags=26%, list=8%, signal=28%
GO_CEREBRAL_CORTEX_RADIALLY_ORIENTED_CELL_MIGRATION	GO_CEREBRAL_CORTEX_RADIALLY_ORIENTED_CELL_MIGRATION		31	0.494241	1.43101	0.0815109	0.187401	0.99	3611	tags=35%, list=7%, signal=38%
GO_PROTEIN_DNA_COMPLEX_DISASSEMBLY	GO_PROTEIN_DNA_COMPLEX_DISASSEMBLY		20	0.540485	1.43047	0.0955414	0.187621	0.99	3668	tags=40%, list=7%, signal=43%
GO_REGULATION_OF_DNA_BIOSYNTHETIC_PROCESS	GO_REGULATION_OF_DNA_BIOSYNTHETIC_PROCESS		108	0.418816	1.42935	0.123529	0.188435	0.99	6846	tags=45%, list=12%, signal=52%
GO_PEPTIDYL_TYROSINE_AUTOPHOSPHORYLATION	GO_PEPTIDYL_TYROSINE_AUTOPHOSPHORYLATION		41	0.464067	1.42925	0.0697211	0.188178	0.99	3299	tags=34%, list=6%, signal=36%
GO_RAC_PROTEIN_SIGNAL_TRANSDUCTION	GO_RAC_PROTEIN_SIGNAL_TRANSDUCTION		39	0.478922	1.42839	0.0935673	0.188762	0.99	5533	tags=49%, list=10%, signal=54%
GO_REGULATION_OF_PROTEIN_LOCALIZATION_TO_MEMBRANE	GO_REGULATION_OF_PROTEIN_LOCALIZATION_TO_MEMBRANE		194	0.370435	1.42807	0.054902	0.188758	0.99	6346	tags=37%, list=11%, signal=41%
GO_CENTRAL_NERVOUS_SYSTEM_NEURON_AXONOGENESIS	GO_CENTRAL_NERVOUS_SYSTEM_NEURON_AXONOGENESIS		36	0.46233	1.42801	0.0775348	0.188486	0.99	3315	tags=31%, list=6%, signal=32%
GO_POSITIVE_REGULATION_OF_MONONUCLEAR_CELL_MIGRATION	GO_POSITIVE_REGULATION_OF_MONONUCLEAR_CELL_MIGRATION		25	0.483364	1.42697	0.0880626	0.189324	0.991	2889	tags=36%, list=5%, signal=38%
GO_CELLULAR_RESPONSE_TO_VIRUS	GO_CELLULAR_RESPONSE_TO_VIRUS		60	0.419099	1.42583	0.0805243	0.190209	0.991	6517	tags=37%, list=12%, signal=42%
GO_REGULATION_OF_CELLULAR_EXTRAVASATION	GO_REGULATION_OF_CELLULAR_EXTRAVASATION		33	0.523925	1.42567	0.116732	0.190044	0.991	4438	tags=42%, list=8%, signal=46%
GO_MORPHOGENESIS_OF_A_POLARIZED_EPITHELIUM	GO_MORPHOGENESIS_OF_A_POLARIZED_EPITHELIUM		145	0.384358	1.42508	0.0752475	0.190306	0.991	4649	tags=30%, list=8%, signal=32%
GO_VASCULAR_ENDOTHELIAL_GROWTH_FACTOR_RECEPTOR_SIGNALING_PATHWAY	GO_VASCULAR_ENDOTHELIAL_GROWTH_FACTOR_RECEPTOR_SIGNALING_PATHWAY		96	0.410906	1.42491	0.0909091	0.190146	0.991	5251	tags=43%, list=9%, signal=47%
GO_NEGATIVE_REGULATION_OF_RECEPTOR_SIGNALING_PATHWAY_VIA_JAK_STAT	GO_NEGATIVE_REGULATION_OF_RECEPTOR_SIGNALING_PATHWAY_VIA_JAK_STAT		24	0.508592	1.4249	0.110672	0.189812	0.991	4788	tags=33%, list=9%, signal=36%
GO_REGULATION_OF_DEFENSE_RESPONSE_TO_VIRUS_BY_HOST	GO_REGULATION_OF_DEFENSE_RESPONSE_TO_VIRUS_BY_HOST		40	0.504858	1.42482	0.128655	0.189559	0.991	6177	tags=43%, list=11%, signal=48%
GO_BONE_CELL_DEVELOPMENT	GO_BONE_CELL_DEVELOPMENT		35	0.471638	1.42392	0.10297	0.19018	0.991	3398	tags=34%, list=6%, signal=36%
GO_REGULATION_OF_EPITHELIAL_CELL_DIFFERENTIATION	GO_REGULATION_OF_EPITHELIAL_CELL_DIFFERENTIATION		164	0.37478	1.42365	0.0592885	0.190137	0.991	4880	tags=32%, list=9%, signal=35%
GO_PROTEIN_LOCALIZATION_TO_ENDOSOME	GO_PROTEIN_LOCALIZATION_TO_ENDOSOME		25	0.540868	1.4234	0.102362	0.190051	0.991	4939	tags=44%, list=9%, signal=48%
GO_POSITIVE_REGULATION_OF_EPIDERMIS_DEVELOPMENT	GO_POSITIVE_REGULATION_OF_EPIDERMIS_DEVELOPMENT		44	0.412482	1.42311	0.0596421	0.190031	0.991	4880	tags=34%, list=9%, signal=37%
GO_NEGATIVE_REGULATION_OF_CELL_CYCLE_G1_S_PHASE_TRANSITION	GO_NEGATIVE_REGULATION_OF_CELL_CYCLE_G1_S_PHASE_TRANSITION		121	0.384919	1.42221	0.0761905	0.190589	0.991	5765	tags=31%, list=10%, signal=35%
GO_NEURON_PROJECTION_ORGANIZATION	GO_NEURON_PROJECTION_ORGANIZATION		92	0.41514	1.42218	0.0956023	0.190279	0.991	5839	tags=37%, list=11%, signal=41%
GO_CELLULAR_RESPONSE_TO_ALKALOID	GO_CELLULAR_RESPONSE_TO_ALKALOID		35	0.462615	1.42159	0.0675944	0.190566	0.991	5295	tags=43%, list=10%, signal=47%
GO_REGULATION_OF_MONOCYTE_DIFFERENTIATION	GO_REGULATION_OF_MONOCYTE_DIFFERENTIATION		22	0.527131	1.42109	0.0851485	0.190789	0.991	7378	tags=45%, list=13%, signal=52%
GO_REGULATION_OF_PROTEIN_LOCALIZATION_TO_CELL_PERIPHERY	GO_REGULATION_OF_PROTEIN_LOCALIZATION_TO_CELL_PERIPHERY		122	0.378483	1.42039	0.0557692	0.19119	0.991	4256	tags=30%, list=8%, signal=32%
GO_REGULATION_OF_LEUKOCYTE_CHEMOTAXIS	GO_REGULATION_OF_LEUKOCYTE_CHEMOTAXIS		123	0.423959	1.41965	0.102362	0.191606	0.991	5058	tags=38%, list=9%, signal=42%
GO_NEURAL_TUBE_FORMATION	GO_NEURAL_TUBE_FORMATION		106	0.424864	1.41928	0.109162	0.191669	0.991	5969	tags=40%, list=11%, signal=44%
GO_RESPONSE_TO_SALT_STRESS	GO_RESPONSE_TO_SALT_STRESS		27	0.449928	1.41878	0.0557692	0.191854	0.991	3734	tags=33%, list=7%, signal=36%
GO_MODULATION_OF_PROCESS_OF_OTHER_ORGANISM	GO_MODULATION_OF_PROCESS_OF_OTHER_ORGANISM		113	0.386258	1.41867	0.0772201	0.191667	0.991	5413	tags=30%, list=10%, signal=33%
GO_POSITIVE_REGULATION_OF_EPIDERMAL_CELL_DIFFERENTIATION	GO_POSITIVE_REGULATION_OF_EPIDERMAL_CELL_DIFFERENTIATION		28	0.434991	1.41832	0.0625	0.191696	0.991	4880	tags=39%, list=9%, signal=43%
GO_MITOTIC_DNA_INTEGRITY_CHECKPOINT	GO_MITOTIC_DNA_INTEGRITY_CHECKPOINT		107	0.433367	1.41819	0.117188	0.19151	0.991	5765	tags=38%, list=10%, signal=43%
GO_FOLIC_ACID_CONTAINING_COMPOUND_METABOLIC_PROCESS	GO_FOLIC_ACID_CONTAINING_COMPOUND_METABOLIC_PROCESS		28	0.477876	1.41776	0.0905433	0.19165	0.991	4601	tags=36%, list=8%, signal=39%
GO_REGULATION_OF_MORPHOGENESIS_OF_AN_EPITHELIUM	GO_REGULATION_OF_MORPHOGENESIS_OF_AN_EPITHELIUM		180	0.374528	1.417	0.0724346	0.192086	0.991	4649	tags=29%, list=8%, signal=32%
GO_VIRAL_RELEASE_FROM_HOST_CELL	GO_VIRAL_RELEASE_FROM_HOST_CELL		34	0.482515	1.41662	0.0980392	0.192159	0.991	3834	tags=26%, list=7%, signal=28%
GO_CELLULAR_SENESCENCE	GO_CELLULAR_SENESCENCE		73	0.398509	1.41606	0.0715667	0.192345	0.991	6199	tags=40%, list=11%, signal=45%
GO_NEGATIVE_REGULATION_OF_INTERLEUKIN_6_PRODUCTION	GO_NEGATIVE_REGULATION_OF_INTERLEUKIN_6_PRODUCTION		58	0.458892	1.41602	0.142857	0.192057	0.991	7176	tags=38%, list=13%, signal=44%
GO_INTERFERON_ALPHA_PRODUCTION	GO_INTERFERON_ALPHA_PRODUCTION		27	0.571141	1.41534	0.124756	0.192446	0.992	5411	tags=41%, list=10%, signal=45%
GO_RESPONSE_TO_ETHANOL	GO_RESPONSE_TO_ETHANOL		122	0.360334	1.41442	0.0365854	0.193149	0.992	4355	tags=29%, list=8%, signal=31%
GO_INTERLEUKIN_2_PRODUCTION	GO_INTERLEUKIN_2_PRODUCTION		54	0.477607	1.41369	0.132653	0.193645	0.993	7895	tags=50%, list=14%, signal=58%
GO_REGULATION_OF_FIBROBLAST_GROWTH_FACTOR_RECEPTOR_SIGNALING_PATHWAY	GO_REGULATION_OF_FIBROBLAST_GROWTH_FACTOR_RECEPTOR_SIGNALING_PATHWAY		37	0.44071	1.41261	0.0742188	0.194513	0.993	3940	tags=30%, list=7%, signal=32%
GO_REGULATION_OF_RECEPTOR_RECYCLING	GO_REGULATION_OF_RECEPTOR_RECYCLING		23	0.481844	1.41255	0.0881764	0.194252	0.993	2739	tags=35%, list=5%, signal=37%
GO_FIBROBLAST_APOPTOTIC_PROCESS	GO_FIBROBLAST_APOPTOTIC_PROCESS		22	0.5102	1.41107	0.105973	0.195544	0.993	8727	tags=55%, list=16%, signal=65%
GO_POSITIVE_REGULATION_OF_INTRINSIC_APOPTOTIC_SIGNALING_PATHWAY	GO_POSITIVE_REGULATION_OF_INTRINSIC_APOPTOTIC_SIGNALING_PATHWAY		61	0.389452	1.41065	0.0796646	0.19565	0.993	4955	tags=33%, list=9%, signal=36%
GO_REACTIVE_NITROGEN_SPECIES_METABOLIC_PROCESS	GO_REACTIVE_NITROGEN_SPECIES_METABOLIC_PROCESS		85	0.39133	1.41053	0.0694445	0.195453	0.993	6346	tags=36%, list=11%, signal=41%
GO_NEGATIVE_REGULATION_OF_BIOMINERALIZATION	GO_NEGATIVE_REGULATION_OF_BIOMINERALIZATION		29	0.466135	1.41034	0.0811359	0.19533	0.993	4401	tags=38%, list=8%, signal=41%
GO_NUCLEOSIDE_MONOPHOSPHATE_BIOSYNTHETIC_PROCESS	GO_NUCLEOSIDE_MONOPHOSPHATE_BIOSYNTHETIC_PROCESS		44	0.443887	1.41034	0.0991379	0.194997	0.993	5957	tags=41%, list=11%, signal=46%
GO_VESICLE_CYTOSKELETAL_TRAFFICKING	GO_VESICLE_CYTOSKELETAL_TRAFFICKING		75	0.43322	1.41022	0.0998004	0.194783	0.993	6342	tags=43%, list=11%, signal=48%
GO_REGULATION_OF_NIK_NF_KAPPAB_SIGNALING	GO_REGULATION_OF_NIK_NF_KAPPAB_SIGNALING		114	0.410736	1.40994	0.0877193	0.19475	0.993	6346	tags=40%, list=11%, signal=45%
GO_POSITIVE_REGULATION_OF_RECEPTOR_MEDIATED_ENDOCYTOSIS	GO_POSITIVE_REGULATION_OF_RECEPTOR_MEDIATED_ENDOCYTOSIS		52	0.407423	1.40982	0.0512821	0.194578	0.993	5057	tags=33%, list=9%, signal=36%
GO_CELLULAR_RESPONSE_TO_AMYLOID_BETA	GO_CELLULAR_RESPONSE_TO_AMYLOID_BETA		44	0.452222	1.40972	0.0775194	0.194354	0.993	6138	tags=41%, list=11%, signal=46%
GO_LOW_DENSITY_LIPOPROTEIN_RECEPTOR_PARTICLE_METABOLIC_PROCESS	GO_LOW_DENSITY_LIPOPROTEIN_RECEPTOR_PARTICLE_METABOLIC_PROCESS		23	0.475471	1.40952	0.109731	0.194212	0.993	9154	tags=48%, list=17%, signal=57%
GO_RECOMBINATIONAL_REPAIR	GO_RECOMBINATIONAL_REPAIR		140	0.440395	1.40674	0.120553	0.196883	0.993	5839	tags=37%, list=11%, signal=41%
GO_CERAMIDE_BIOSYNTHETIC_PROCESS	GO_CERAMIDE_BIOSYNTHETIC_PROCESS		67	0.40339	1.40586	0.0857143	0.197467	0.993	6575	tags=34%, list=12%, signal=39%
GO_POSITIVE_REGULATION_OF_MITOTIC_NUCLEAR_DIVISION	GO_POSITIVE_REGULATION_OF_MITOTIC_NUCLEAR_DIVISION		57	0.423085	1.40566	0.0884774	0.19734	0.993	6400	tags=42%, list=12%, signal=48%
GO_NEGATIVE_REGULATION_OF_PROTEIN_CONTAINING_COMPLEX_DISASSEMBLY	GO_NEGATIVE_REGULATION_OF_PROTEIN_CONTAINING_COMPLEX_DISASSEMBLY		81	0.41992	1.40548	0.0958904	0.197227	0.993	4334	tags=31%, list=8%, signal=33%
GO_RECEPTOR_RECYCLING	GO_RECEPTOR_RECYCLING		34	0.441588	1.40491	0.0747475	0.197563	0.993	2739	tags=29%, list=5%, signal=31%
GO_NEGATIVE_REGULATION_OF_SUPRAMOLECULAR_FIBER_ORGANIZATION	GO_NEGATIVE_REGULATION_OF_SUPRAMOLECULAR_FIBER_ORGANIZATION		150	0.37608	1.4045	0.0757282	0.197688	0.993	5937	tags=36%, list=11%, signal=40%
GO_POSITIVE_REGULATION_OF_NUCLEOCYTOPLASMIC_TRANSPORT	GO_POSITIVE_REGULATION_OF_NUCLEOCYTOPLASMIC_TRANSPORT		66	0.423684	1.40315	0.110899	0.198811	0.994	6177	tags=35%, list=11%, signal=39%
GO_NIK_NF_KAPPAB_SIGNALING	GO_NIK_NF_KAPPAB_SIGNALING		179	0.391117	1.40057	0.0958904	0.20126	0.995	6346	tags=35%, list=11%, signal=39%
GO_PORE_COMPLEX_ASSEMBLY	GO_PORE_COMPLEX_ASSEMBLY		20	0.529643	1.40053	0.108216	0.200983	0.995	6663	tags=50%, list=12%, signal=57%
GO_CYTOPLASMIC_SEQUESTERING_OF_PROTEIN	GO_CYTOPLASMIC_SEQUESTERING_OF_PROTEIN		23	0.493767	1.40038	0.112016	0.200845	0.995	8463	tags=57%, list=15%, signal=67%
GO_NEGATIVE_REGULATION_OF_CELLULAR_SENESCENCE	GO_NEGATIVE_REGULATION_OF_CELLULAR_SENESCENCE		22	0.497683	1.40012	0.101167	0.200802	0.995	6094	tags=50%, list=11%, signal=56%
GO_MORPHOGENESIS_OF_EMBRYONIC_EPITHELIUM	GO_MORPHOGENESIS_OF_EMBRYONIC_EPITHELIUM		151	0.393891	1.39922	0.10397	0.201554	0.995	6111	tags=35%, list=11%, signal=39%
GO_REGULATION_OF_OXIDATIVE_STRESS_INDUCED_CELL_DEATH	GO_REGULATION_OF_OXIDATIVE_STRESS_INDUCED_CELL_DEATH		65	0.394425	1.39905	0.0657084	0.201396	0.995	6814	tags=40%, list=12%, signal=46%
GO_POSITIVE_REGULATION_OF_LEUKOCYTE_DEGRANULATION	GO_POSITIVE_REGULATION_OF_LEUKOCYTE_DEGRANULATION		25	0.46399	1.39892	0.1167	0.201207	0.995	4516	tags=48%, list=8%, signal=52%
GO_REGULATION_OF_PEPTIDYL_THREONINE_PHOSPHORYLATION	GO_REGULATION_OF_PEPTIDYL_THREONINE_PHOSPHORYLATION		47	0.436958	1.39745	0.0975104	0.202539	0.995	5224	tags=36%, list=9%, signal=40%
GO_DNA_INTEGRITY_CHECKPOINT	GO_DNA_INTEGRITY_CHECKPOINT		160	0.41981	1.39697	0.141748	0.202783	0.995	6293	tags=37%, list=11%, signal=41%
GO_NEGATIVE_REGULATION_OF_EPITHELIAL_TO_MESENCHYMAL_TRANSITION	GO_NEGATIVE_REGULATION_OF_EPITHELIAL_TO_MESENCHYMAL_TRANSITION		37	0.425746	1.39599	0.0807087	0.203511	0.995	3005	tags=27%, list=5%, signal=29%
GO_RESPONSE_TO_AMYLOID_BETA	GO_RESPONSE_TO_AMYLOID_BETA		55	0.428749	1.39539	0.082218	0.203844	0.995	6138	tags=42%, list=11%, signal=47%
GO_NEGATIVE_REGULATION_OF_PROTEIN_BINDING	GO_NEGATIVE_REGULATION_OF_PROTEIN_BINDING		106	0.36909	1.39511	0.0665362	0.203815	0.995	5894	tags=32%, list=11%, signal=36%
GO_POSITIVE_REGULATION_OF_EXCITATORY_POSTSYNAPTIC_POTENTIAL	GO_POSITIVE_REGULATION_OF_EXCITATORY_POSTSYNAPTIC_POTENTIAL		28	0.472332	1.39468	0.0670611	0.20392	0.995	2957	tags=36%, list=5%, signal=38%
GO_NEGATIVE_REGULATION_OF_CELL_MATRIX_ADHESION	GO_NEGATIVE_REGULATION_OF_CELL_MATRIX_ADHESION		38	0.461635	1.39466	0.118	0.203604	0.995	5736	tags=47%, list=10%, signal=53%
GO_NEGATIVE_REGULATION_OF_CYTOKINE_SECRETION	GO_NEGATIVE_REGULATION_OF_CYTOKINE_SECRETION		36	0.454253	1.39461	0.113821	0.203321	0.995	5570	tags=33%, list=10%, signal=37%
GO_CENTRAL_NERVOUS_SYSTEM_PROJECTION_NEURON_AXONOGENESIS	GO_CENTRAL_NERVOUS_SYSTEM_PROJECTION_NEURON_AXONOGENESIS		26	0.458585	1.39398	0.0907298	0.203682	0.995	7857	tags=46%, list=14%, signal=54%
GO_SERTOLI_CELL_DIFFERENTIATION	GO_SERTOLI_CELL_DIFFERENTIATION		21	0.459268	1.39389	0.0756646	0.203444	0.995	1308	tags=19%, list=2%, signal=20%
GO_POSITIVE_REGULATION_OF_CELLULAR_EXTRAVASATION	GO_POSITIVE_REGULATION_OF_CELLULAR_EXTRAVASATION		21	0.550505	1.39379	0.132411	0.203229	0.995	4438	tags=52%, list=8%, signal=57%
GO_MUSCLE_CELL_MIGRATION	GO_MUSCLE_CELL_MIGRATION		95	0.398919	1.39357	0.0934959	0.203121	0.995	2957	tags=25%, list=5%, signal=27%
GO_RESPONSE_TO_RETINOIC_ACID	GO_RESPONSE_TO_RETINOIC_ACID		108	0.38928	1.39351	0.0806754	0.20287	0.995	6111	tags=34%, list=11%, signal=38%
GO_STRESS_FIBER_ASSEMBLY	GO_STRESS_FIBER_ASSEMBLY		104	0.401439	1.39246	0.0927022	0.20364	0.995	5764	tags=39%, list=10%, signal=44%
GO_POSITIVE_REGULATION_OF_ACTIVATED_T_CELL_PROLIFERATION	GO_POSITIVE_REGULATION_OF_ACTIVATED_T_CELL_PROLIFERATION		25	0.494462	1.39225	0.119675	0.203526	0.995	6839	tags=56%, list=12%, signal=64%
GO_RESPONSE_TO_IMMOBILIZATION_STRESS	GO_RESPONSE_TO_IMMOBILIZATION_STRESS		26	0.467802	1.39185	0.0692464	0.203633	0.995	2292	tags=27%, list=4%, signal=28%
GO_NEGATIVE_REGULATION_OF_NEURON_APOPTOTIC_PROCESS	GO_NEGATIVE_REGULATION_OF_NEURON_APOPTOTIC_PROCESS		149	0.365169	1.39171	0.077381	0.203443	0.995	6138	tags=36%, list=11%, signal=40%
GO_POSITIVE_REGULATION_OF_INTERLEUKIN_4_PRODUCTION	GO_POSITIVE_REGULATION_OF_INTERLEUKIN_4_PRODUCTION		24	0.551046	1.39157	0.171315	0.203244	0.995	8335	tags=71%, list=15%, signal=83%
GO_DNA_DAMAGE_RESPONSE_SIGNAL_TRANSDUCTION_BY_P53_CLASS_MEDIATOR	GO_DNA_DAMAGE_RESPONSE_SIGNAL_TRANSDUCTION_BY_P53_CLASS_MEDIATOR		107	0.4021	1.39152	0.124528	0.202961	0.995	5765	tags=36%, list=10%, signal=40%
GO_TOLL_LIKE_RECEPTOR_4_SIGNALING_PATHWAY	GO_TOLL_LIKE_RECEPTOR_4_SIGNALING_PATHWAY		39	0.499412	1.39075	0.125483	0.203483	0.995	4147	tags=38%, list=7%, signal=42%
GO_ACTIN_FILAMENT_BUNDLE_ORGANIZATION	GO_ACTIN_FILAMENT_BUNDLE_ORGANIZATION		158	0.385116	1.39073	0.102204	0.20318	0.995	6080	tags=40%, list=11%, signal=45%
GO_INTEGRIN_ACTIVATION	GO_INTEGRIN_ACTIVATION		24	0.555226	1.39057	0.143443	0.20305	0.995	7762	tags=54%, list=14%, signal=63%
GO_RECEPTOR_METABOLIC_PROCESS	GO_RECEPTOR_METABOLIC_PROCESS		198	0.359428	1.39047	0.0809249	0.202823	0.995	6371	tags=34%, list=11%, signal=38%
GO_POSITIVE_REGULATION_OF_PROTEIN_EXPORT_FROM_NUCLEUS	GO_POSITIVE_REGULATION_OF_PROTEIN_EXPORT_FROM_NUCLEUS		21	0.472089	1.38982	0.105163	0.203252	0.995	4401	tags=38%, list=8%, signal=41%
GO_NEGATIVE_REGULATION_OF_RESPONSE_TO_BIOTIC_STIMULUS	GO_NEGATIVE_REGULATION_OF_RESPONSE_TO_BIOTIC_STIMULUS		97	0.421207	1.38886	0.137597	0.203974	0.995	7963	tags=43%, list=14%, signal=50%
GO_REGULATION_OF_NEUTROPHIL_CHEMOTAXIS	GO_REGULATION_OF_NEUTROPHIL_CHEMOTAXIS		32	0.498082	1.38849	0.138672	0.204019	0.995	5058	tags=47%, list=9%, signal=52%
GO_POSITIVE_REGULATION_OF_INTRACELLULAR_PROTEIN_TRANSPORT	GO_POSITIVE_REGULATION_OF_INTRACELLULAR_PROTEIN_TRANSPORT		181	0.368616	1.38784	0.0984556	0.204368	0.995	6177	tags=35%, list=11%, signal=39%
GO_RESPONSE_TO_ALKALOID	GO_RESPONSE_TO_ALKALOID		104	0.365387	1.386	0.0541045	0.206115	0.995	5295	tags=33%, list=10%, signal=36%
GO_PRODUCTION_OF_MOLECULAR_MEDIATOR_INVOLVED_IN_INFLAMMATORY_RESPONSE	GO_PRODUCTION_OF_MOLECULAR_MEDIATOR_INVOLVED_IN_INFLAMMATORY_RESPONSE		88	0.401869	1.38595	0.137864	0.205844	0.995	7539	tags=38%, list=14%, signal=43%
GO_REGULATION_OF_BONE_REMODELING	GO_REGULATION_OF_BONE_REMODELING		50	0.427364	1.38577	0.0718563	0.205693	0.995	6205	tags=34%, list=11%, signal=38%
GO_POSITIVE_REGULATION_OF_EMBRYONIC_DEVELOPMENT	GO_POSITIVE_REGULATION_OF_EMBRYONIC_DEVELOPMENT		42	0.4332	1.3856	0.0834915	0.205529	0.995	3989	tags=26%, list=7%, signal=28%
GO_REGULATION_OF_DNA_RECOMBINATION	GO_REGULATION_OF_DNA_RECOMBINATION		107	0.413433	1.3856	0.0996094	0.205214	0.995	6400	tags=38%, list=12%, signal=43%
GO_REGULATION_OF_DEFENSE_RESPONSE_TO_VIRUS	GO_REGULATION_OF_DEFENSE_RESPONSE_TO_VIRUS		78	0.430496	1.38555	0.12334	0.20492	0.995	5116	tags=33%, list=9%, signal=37%
GO_ACTIN_FILAMENT_DEPOLYMERIZATION	GO_ACTIN_FILAMENT_DEPOLYMERIZATION		58	0.425719	1.38548	0.082218	0.204667	0.995	4070	tags=36%, list=7%, signal=39%
GO_LEUKOCYTE_TETHERING_OR_ROLLING	GO_LEUKOCYTE_TETHERING_OR_ROLLING		29	0.534631	1.38422	0.143133	0.205658	0.995	6346	tags=52%, list=11%, signal=58%
GO_DENDRITIC_SPINE_DEVELOPMENT	GO_DENDRITIC_SPINE_DEVELOPMENT		102	0.422121	1.38271	0.120388	0.207025	0.995	5955	tags=40%, list=11%, signal=45%
GO_REGULATION_OF_TELOMERASE_ACTIVITY	GO_REGULATION_OF_TELOMERASE_ACTIVITY		47	0.452342	1.38177	0.151822	0.207817	0.995	7414	tags=53%, list=13%, signal=61%
GO_CYTOKINESIS	GO_CYTOKINESIS		172	0.391001	1.38123	0.119318	0.208039	0.995	6306	tags=38%, list=11%, signal=43%
GO_ACTIVATION_OF_MAPKK_ACTIVITY	GO_ACTIVATION_OF_MAPKK_ACTIVITY		52	0.449784	1.38113	0.124	0.207813	0.995	4398	tags=33%, list=8%, signal=35%
GO_EPITHELIAL_TO_MESENCHYMAL_TRANSITION	GO_EPITHELIAL_TO_MESENCHYMAL_TRANSITION		148	0.381847	1.38078	0.0809249	0.207905	0.995	3989	tags=30%, list=7%, signal=33%
GO_PROTEIN_TARGETING_TO_LYSOSOME	GO_PROTEIN_TARGETING_TO_LYSOSOME		22	0.539917	1.3805	0.140873	0.207915	0.995	6741	tags=50%, list=12%, signal=57%
GO_NEGATIVE_REGULATION_OF_LEUKOCYTE_MIGRATION	GO_NEGATIVE_REGULATION_OF_LEUKOCYTE_MIGRATION		46	0.466938	1.38017	0.134387	0.207941	0.995	6514	tags=37%, list=12%, signal=42%
GO_PEPTIDE_CATABOLIC_PROCESS	GO_PEPTIDE_CATABOLIC_PROCESS		31	0.422529	1.3799	0.0725191	0.207879	0.995	6607	tags=48%, list=12%, signal=55%
GO_CHONDROCYTE_DEVELOPMENT	GO_CHONDROCYTE_DEVELOPMENT		31	0.501758	1.37888	0.138996	0.208654	0.995	3491	tags=39%, list=6%, signal=41%
GO_PROTEIN_LOCALIZATION_TO_LYSOSOME	GO_PROTEIN_LOCALIZATION_TO_LYSOSOME		43	0.432584	1.3788	0.116564	0.2084	0.995	5866	tags=33%, list=11%, signal=36%
GO_NON_CANONICAL_WNT_SIGNALING_PATHWAY	GO_NON_CANONICAL_WNT_SIGNALING_PATHWAY		151	0.376402	1.37876	0.0957031	0.208137	0.995	6154	tags=36%, list=11%, signal=40%
GO_POSITIVE_REGULATION_OF_CELL_MATRIX_ADHESION	GO_POSITIVE_REGULATION_OF_CELL_MATRIX_ADHESION		55	0.417969	1.37859	0.103113	0.208025	0.995	4017	tags=36%, list=7%, signal=39%
GO_RIBOSOMAL_SMALL_SUBUNIT_BIOGENESIS	GO_RIBOSOMAL_SMALL_SUBUNIT_BIOGENESIS		75	0.471514	1.37842	0.170576	0.207931	0.995	7278	tags=47%, list=13%, signal=54%
GO_PLASMA_MEMBRANE_ORGANIZATION	GO_PLASMA_MEMBRANE_ORGANIZATION		113	0.3466	1.37785	0.0623819	0.208242	0.995	3993	tags=29%, list=7%, signal=31%
GO_NEGATIVE_REGULATION_OF_BONE_MINERALIZATION	GO_NEGATIVE_REGULATION_OF_BONE_MINERALIZATION		20	0.475853	1.37722	0.0996016	0.208574	0.995	3299	tags=30%, list=6%, signal=32%
GO_CARDIAC_RIGHT_VENTRICLE_MORPHOGENESIS	GO_CARDIAC_RIGHT_VENTRICLE_MORPHOGENESIS		20	0.497226	1.37717	0.0964567	0.208305	0.995	3163	tags=30%, list=6%, signal=32%
GO_POSITIVE_REGULATION_OF_CHROMOSOME_SEGREGATION	GO_POSITIVE_REGULATION_OF_CHROMOSOME_SEGREGATION		33	0.498126	1.37706	0.129741	0.208118	0.995	7567	tags=52%, list=14%, signal=60%
GO_CELLULAR_RESPONSE_TO_VITAMIN	GO_CELLULAR_RESPONSE_TO_VITAMIN		32	0.435663	1.37693	0.0830116	0.207945	0.995	5025	tags=31%, list=9%, signal=34%
GO_DNA_DAMAGE_RESPONSE_DETECTION_OF_DNA_DAMAGE	GO_DNA_DAMAGE_RESPONSE_DETECTION_OF_DNA_DAMAGE		38	0.470831	1.37645	0.143763	0.20819	0.995	5158	tags=42%, list=9%, signal=46%
GO_NEGATIVE_REGULATION_OF_ACTIN_FILAMENT_POLYMERIZATION	GO_NEGATIVE_REGULATION_OF_ACTIN_FILAMENT_POLYMERIZATION		63	0.391429	1.37506	0.0929791	0.209383	0.995	5766	tags=40%, list=10%, signal=44%
GO_NEGATIVE_REGULATION_OF_BINDING	GO_NEGATIVE_REGULATION_OF_BINDING		169	0.351053	1.37436	0.0815534	0.209855	0.995	6058	tags=30%, list=11%, signal=34%
GO_NEGATIVE_REGULATION_OF_RECEPTOR_SIGNALING_PATHWAY_VIA_STAT	GO_NEGATIVE_REGULATION_OF_RECEPTOR_SIGNALING_PATHWAY_VIA_STAT		30	0.457573	1.37422	0.104046	0.209674	0.995	7799	tags=37%, list=14%, signal=43%
GO_PRESYNAPTIC_ENDOCYTOSIS	GO_PRESYNAPTIC_ENDOCYTOSIS		62	0.392983	1.3741	0.0968992	0.209485	0.995	4821	tags=37%, list=9%, signal=41%
GO_REGULATION_OF_CELL_MATRIX_ADHESION	GO_REGULATION_OF_CELL_MATRIX_ADHESION		120	0.398518	1.37404	0.112871	0.20921	0.995	5764	tags=41%, list=10%, signal=45%
GO_NEGATIVE_REGULATION_OF_CELL_AGING	GO_NEGATIVE_REGULATION_OF_CELL_AGING		28	0.457626	1.37331	0.116054	0.209744	0.995	7418	tags=50%, list=13%, signal=58%
GO_VASCULAR_ENDOTHELIAL_GROWTH_FACTOR_PRODUCTION	GO_VASCULAR_ENDOTHELIAL_GROWTH_FACTOR_PRODUCTION		56	0.384385	1.37314	0.083499	0.209666	0.995	8164	tags=34%, list=15%, signal=40%
GO_POSITIVE_REGULATION_OF_CHEMOTAXIS	GO_POSITIVE_REGULATION_OF_CHEMOTAXIS		144	0.396662	1.37293	0.121032	0.209597	0.995	6451	tags=40%, list=12%, signal=45%
GO_RESPONSE_TO_AMPHETAMINE	GO_RESPONSE_TO_AMPHETAMINE		33	0.42428	1.37211	0.0839844	0.210164	0.995	6146	tags=42%, list=11%, signal=48%
GO_NUCLEOTIDE_BINDING_DOMAIN_LEUCINE_RICH_REPEAT_CONTAINING_RECEPTOR_SIGNALING_PATHWAY	GO_NUCLEOTIDE_BINDING_DOMAIN_LEUCINE_RICH_REPEAT_CONTAINING_RECEPTOR_SIGNALING_PATHWAY		38	0.498578	1.37162	0.157197	0.210363	0.995	5158	tags=39%, list=9%, signal=43%
GO_NEGATIVE_REGULATION_OF_MACROAUTOPHAGY	GO_NEGATIVE_REGULATION_OF_MACROAUTOPHAGY		34	0.45273	1.37115	0.12426	0.210588	0.995	6087	tags=35%, list=11%, signal=40%
GO_PHOSPHATIDYLETHANOLAMINE_ACYL_CHAIN_REMODELING	GO_PHOSPHATIDYLETHANOLAMINE_ACYL_CHAIN_REMODELING		26	0.449118	1.37107	0.0980392	0.210369	0.995	5410	tags=35%, list=10%, signal=38%
GO_GLAND_MORPHOGENESIS	GO_GLAND_MORPHOGENESIS		124	0.381584	1.37085	0.0844278	0.210303	0.995	4788	tags=35%, list=9%, signal=39%
GO_CELLULAR_RESPONSE_TO_INTERFERON_BETA	GO_CELLULAR_RESPONSE_TO_INTERFERON_BETA		22	0.506489	1.37078	0.136634	0.210072	0.995	4578	tags=36%, list=8%, signal=40%
GO_POSITIVE_REGULATION_OF_EXTRACELLULAR_MATRIX_ORGANIZATION	GO_POSITIVE_REGULATION_OF_EXTRACELLULAR_MATRIX_ORGANIZATION		21	0.507233	1.37059	0.124514	0.20997	0.995	5764	tags=43%, list=10%, signal=48%
GO_REGULATION_OF_GASTRULATION	GO_REGULATION_OF_GASTRULATION		42	0.434864	1.37049	0.0808679	0.209755	0.995	3005	tags=26%, list=5%, signal=28%
GO_COMPLEMENT_ACTIVATION	GO_COMPLEMENT_ACTIVATION		167	0.545391	1.3702	0.184426	0.20978	0.995	11373	tags=69%, list=21%, signal=86%
GO_POSITIVE_REGULATION_OF_OLIGODENDROCYTE_DIFFERENTIATION	GO_POSITIVE_REGULATION_OF_OLIGODENDROCYTE_DIFFERENTIATION		23	0.476658	1.37003	0.105263	0.209663	0.995	5980	tags=48%, list=11%, signal=54%
GO_REGULATION_OF_INTRINSIC_APOPTOTIC_SIGNALING_PATHWAY	GO_REGULATION_OF_INTRINSIC_APOPTOTIC_SIGNALING_PATHWAY		163	0.34406	1.3692	0.078629	0.210268	0.995	4955	tags=31%, list=9%, signal=34%
GO_NEGATIVE_REGULATION_OF_PROTEIN_CONTAINING_COMPLEX_ASSEMBLY	GO_NEGATIVE_REGULATION_OF_PROTEIN_CONTAINING_COMPLEX_ASSEMBLY		138	0.361189	1.36919	0.0817121	0.209965	0.995	4649	tags=31%, list=8%, signal=34%
GO_CELLULAR_RESPONSE_TO_NUTRIENT	GO_CELLULAR_RESPONSE_TO_NUTRIENT		44	0.40726	1.36897	0.0849421	0.209898	0.995	5025	tags=32%, list=9%, signal=35%
GO_REGULATION_OF_DOUBLE_STRAND_BREAK_REPAIR	GO_REGULATION_OF_DOUBLE_STRAND_BREAK_REPAIR		85	0.418784	1.36857	0.144578	0.209987	0.995	5839	tags=38%, list=11%, signal=42%
GO_HETEROPHILIC_CELL_CELL_ADHESION_VIA_PLASMA_MEMBRANE_CELL_ADHESION_MOLECULES	GO_HETEROPHILIC_CELL_CELL_ADHESION_VIA_PLASMA_MEMBRANE_CELL_ADHESION_MOLECULES		47	0.416396	1.36709	0.0836576	0.211267	0.995	4824	tags=34%, list=9%, signal=37%
GO_RESPONSE_TO_AMINE	GO_RESPONSE_TO_AMINE		47	0.387684	1.36671	0.065764	0.211348	0.995	6146	tags=38%, list=11%, signal=43%
GO_REGULATION_OF_VIRAL_GENOME_REPLICATION	GO_REGULATION_OF_VIRAL_GENOME_REPLICATION		100	0.410403	1.36658	0.10989	0.211176	0.995	7279	tags=43%, list=13%, signal=49%
GO_REGULATION_OF_EPIDERMAL_GROWTH_FACTOR_ACTIVATED_RECEPTOR_ACTIVITY	GO_REGULATION_OF_EPIDERMAL_GROWTH_FACTOR_ACTIVATED_RECEPTOR_ACTIVITY		30	0.452647	1.36655	0.122699	0.210915	0.995	8219	tags=57%, list=15%, signal=66%
GO_CELL_SUBSTRATE_JUNCTION_ORGANIZATION	GO_CELL_SUBSTRATE_JUNCTION_ORGANIZATION		102	0.431352	1.36619	0.149901	0.211012	0.995	3457	tags=35%, list=6%, signal=38%
GO_REGULATION_OF_RECEPTOR_MEDIATED_ENDOCYTOSIS	GO_REGULATION_OF_RECEPTOR_MEDIATED_ENDOCYTOSIS		103	0.356824	1.3661	0.0706107	0.210792	0.995	5912	tags=32%, list=11%, signal=36%
GO_POSITIVE_REGULATION_OF_POSTTRANSCRIPTIONAL_GENE_SILENCING	GO_POSITIVE_REGULATION_OF_POSTTRANSCRIPTIONAL_GENE_SILENCING		25	0.512919	1.36608	0.151822	0.210508	0.995	6297	tags=48%, list=11%, signal=54%
GO_CYTOPLASMIC_PATTERN_RECOGNITION_RECEPTOR_SIGNALING_PATHWAY	GO_CYTOPLASMIC_PATTERN_RECOGNITION_RECEPTOR_SIGNALING_PATHWAY		68	0.42354	1.36546	0.129213	0.210846	0.995	5158	tags=34%, list=9%, signal=37%
GO_REGULATION_OF_MYOTUBE_DIFFERENTIATION	GO_REGULATION_OF_MYOTUBE_DIFFERENTIATION		60	0.444484	1.36535	0.1222	0.210675	0.995	9320	tags=48%, list=17%, signal=58%
GO_MYD88_DEPENDENT_TOLL_LIKE_RECEPTOR_SIGNALING_PATHWAY	GO_MYD88_DEPENDENT_TOLL_LIKE_RECEPTOR_SIGNALING_PATHWAY		36	0.498295	1.36357	0.175097	0.212385	0.995	8497	tags=58%, list=15%, signal=69%
GO_CERAMIDE_METABOLIC_PROCESS	GO_CERAMIDE_METABOLIC_PROCESS		100	0.3707	1.36318	0.0899796	0.212504	0.995	5829	tags=32%, list=11%, signal=36%
GO_CELL_CELL_JUNCTION_ASSEMBLY	GO_CELL_CELL_JUNCTION_ASSEMBLY		147	0.371958	1.36191	0.0980392	0.213503	0.995	6382	tags=41%, list=12%, signal=46%
GO_RIBOSOMAL_LARGE_SUBUNIT_ASSEMBLY	GO_RIBOSOMAL_LARGE_SUBUNIT_ASSEMBLY		30	0.541263	1.36108	0.209644	0.214088	0.995	9689	tags=60%, list=17%, signal=73%
GO_POSITIVE_REGULATION_OF_INTERLEUKIN_2_PRODUCTION	GO_POSITIVE_REGULATION_OF_INTERLEUKIN_2_PRODUCTION		26	0.531532	1.36078	0.195565	0.214125	0.995	7895	tags=69%, list=14%, signal=81%
GO_ENDODERM_DEVELOPMENT	GO_ENDODERM_DEVELOPMENT		79	0.407104	1.36071	0.10099	0.213903	0.995	4438	tags=32%, list=8%, signal=34%
GO_DNA_DEPENDENT_DNA_REPLICATION	GO_DNA_DEPENDENT_DNA_REPLICATION		151	0.441087	1.3605	0.17126	0.213878	0.995	6677	tags=42%, list=12%, signal=48%
GO_REGULATION_OF_MAST_CELL_ACTIVATION	GO_REGULATION_OF_MAST_CELL_ACTIVATION		44	0.437401	1.35995	0.156942	0.214183	0.995	6058	tags=43%, list=11%, signal=48%
GO_GLYCOPROTEIN_CATABOLIC_PROCESS	GO_GLYCOPROTEIN_CATABOLIC_PROCESS		26	0.444545	1.35994	0.0961924	0.213895	0.995	7685	tags=42%, list=14%, signal=49%
GO_WATER_HOMEOSTASIS	GO_WATER_HOMEOSTASIS		79	0.356259	1.35969	0.0581395	0.213866	0.995	3290	tags=24%, list=6%, signal=26%
GO_REGULATION_OF_ACUTE_INFLAMMATORY_RESPONSE	GO_REGULATION_OF_ACUTE_INFLAMMATORY_RESPONSE		47	0.453585	1.35848	0.14433	0.214906	0.995	7555	tags=47%, list=14%, signal=54%
GO_NEGATIVE_REGULATION_OF_ACTIN_FILAMENT_DEPOLYMERIZATION	GO_NEGATIVE_REGULATION_OF_ACTIN_FILAMENT_DEPOLYMERIZATION		44	0.426126	1.35783	0.104449	0.215383	0.995	4070	tags=36%, list=7%, signal=39%
GO_ACUTE_INFLAMMATORY_RESPONSE_TO_ANTIGENIC_STIMULUS	GO_ACUTE_INFLAMMATORY_RESPONSE_TO_ANTIGENIC_STIMULUS		24	0.529636	1.35766	0.170782	0.215254	0.995	8955	tags=54%, list=16%, signal=65%
GO_ARACHIDONIC_ACID_METABOLIC_PROCESS	GO_ARACHIDONIC_ACID_METABOLIC_PROCESS		58	0.408188	1.3574	0.0796813	0.215215	0.995	5900	tags=33%, list=11%, signal=37%
GO_MODULATION_BY_HOST_OF_SYMBIONT_PROCESS	GO_MODULATION_BY_HOST_OF_SYMBIONT_PROCESS		62	0.388816	1.35736	0.113949	0.214955	0.995	5812	tags=32%, list=10%, signal=36%
GO_PRESYNAPSE_ORGANIZATION	GO_PRESYNAPSE_ORGANIZATION		53	0.400538	1.3567	0.0981818	0.215417	0.995	5311	tags=32%, list=10%, signal=35%
GO_NATURAL_KILLER_CELL_ACTIVATION_INVOLVED_IN_IMMUNE_RESPONSE	GO_NATURAL_KILLER_CELL_ACTIVATION_INVOLVED_IN_IMMUNE_RESPONSE		31	0.445903	1.35634	0.110638	0.215523	0.995	10546	tags=45%, list=19%, signal=56%
GO_MATURATION_OF_LSU_RRNA	GO_MATURATION_OF_LSU_RRNA		28	0.524685	1.35604	0.176596	0.21557	0.995	8260	tags=50%, list=15%, signal=59%
GO_POSITIVE_REGULATION_OF_PRI_MIRNA_TRANSCRIPTION_BY_RNA_POLYMERASE_II	GO_POSITIVE_REGULATION_OF_PRI_MIRNA_TRANSCRIPTION_BY_RNA_POLYMERASE_II		40	0.446262	1.35591	0.153551	0.215439	0.995	3734	tags=43%, list=7%, signal=46%
GO_RESPIRATORY_BURST	GO_RESPIRATORY_BURST		37	0.515761	1.35579	0.192149	0.215255	0.995	7954	tags=62%, list=14%, signal=73%
GO_POSITIVE_REGULATION_OF_BINDING	GO_POSITIVE_REGULATION_OF_BINDING		173	0.351572	1.35562	0.0962672	0.215103	0.995	6236	tags=35%, list=11%, signal=40%
GO_POSITIVE_REGULATION_OF_AXONOGENESIS	GO_POSITIVE_REGULATION_OF_AXONOGENESIS		86	0.399068	1.35549	0.121756	0.214944	0.995	6426	tags=42%, list=12%, signal=47%
GO_NEGATIVE_REGULATION_OF_ACTIN_FILAMENT_BUNDLE_ASSEMBLY	GO_NEGATIVE_REGULATION_OF_ACTIN_FILAMENT_BUNDLE_ASSEMBLY		32	0.44343	1.35481	0.132692	0.215376	0.995	2785	tags=34%, list=5%, signal=36%
GO_COCHLEA_DEVELOPMENT	GO_COCHLEA_DEVELOPMENT		51	0.382216	1.35173	0.0669216	0.218474	0.995	6257	tags=37%, list=11%, signal=42%
GO_MYELOID_CELL_APOPTOTIC_PROCESS	GO_MYELOID_CELL_APOPTOTIC_PROCESS		33	0.428445	1.35129	0.107356	0.21865	0.995	6493	tags=39%, list=12%, signal=45%
GO_CELLULAR_RESPONSE_TO_LIPOPROTEIN_PARTICLE_STIMULUS	GO_CELLULAR_RESPONSE_TO_LIPOPROTEIN_PARTICLE_STIMULUS		33	0.45684	1.35022	0.117417	0.219505	0.995	5812	tags=39%, list=10%, signal=44%
GO_BASE_EXCISION_REPAIR	GO_BASE_EXCISION_REPAIR		40	0.464761	1.3497	0.15222	0.219775	0.996	6999	tags=50%, list=13%, signal=57%
GO_SKELETAL_MUSCLE_TISSUE_REGENERATION	GO_SKELETAL_MUSCLE_TISSUE_REGENERATION		40	0.430077	1.34916	0.111111	0.220043	0.997	3986	tags=33%, list=7%, signal=35%
GO_MALE_SEX_DIFFERENTIATION	GO_MALE_SEX_DIFFERENTIATION		164	0.354926	1.34897	0.0905588	0.219951	0.997	5055	tags=29%, list=9%, signal=32%
GO_MITOTIC_CYTOKINESIS	GO_MITOTIC_CYTOKINESIS		72	0.410458	1.34856	0.147348	0.220074	0.997	6170	tags=40%, list=11%, signal=45%
GO_REGULATION_OF_SUBSTRATE_ADHESION_DEPENDENT_CELL_SPREADING	GO_REGULATION_OF_SUBSTRATE_ADHESION_DEPENDENT_CELL_SPREADING		53	0.411561	1.34821	0.116601	0.220137	0.997	5502	tags=38%, list=10%, signal=42%
GO_NEGATIVE_REGULATION_OF_UBIQUITIN_DEPENDENT_PROTEIN_CATABOLIC_PROCESS	GO_NEGATIVE_REGULATION_OF_UBIQUITIN_DEPENDENT_PROTEIN_CATABOLIC_PROCESS		48	0.406537	1.34751	0.147705	0.220573	0.997	6684	tags=48%, list=12%, signal=54%
GO_INTRINSIC_APOPTOTIC_SIGNALING_PATHWAY_IN_RESPONSE_TO_OXIDATIVE_STRESS	GO_INTRINSIC_APOPTOTIC_SIGNALING_PATHWAY_IN_RESPONSE_TO_OXIDATIVE_STRESS		43	0.409285	1.34734	0.0991903	0.220427	0.997	5418	tags=42%, list=10%, signal=46%
GO_NEGATIVE_REGULATION_OF_LEUKOCYTE_APOPTOTIC_PROCESS	GO_NEGATIVE_REGULATION_OF_LEUKOCYTE_APOPTOTIC_PROCESS		49	0.462029	1.34716	0.185771	0.220278	0.997	5671	tags=43%, list=10%, signal=48%
GO_REGULATION_OF_TELOMERE_MAINTENANCE_VIA_TELOMERE_LENGTHENING	GO_REGULATION_OF_TELOMERE_MAINTENANCE_VIA_TELOMERE_LENGTHENING		60	0.460673	1.34601	0.184891	0.221317	0.997	6846	tags=48%, list=12%, signal=55%
GO_POSITIVE_REGULATION_OF_MRNA_SPLICING_VIA_SPLICEOSOME	GO_POSITIVE_REGULATION_OF_MRNA_SPLICING_VIA_SPLICEOSOME		23	0.473393	1.34575	0.147844	0.221265	0.997	6215	tags=43%, list=11%, signal=49%
GO_POSITIVE_REGULATION_OF_NEURON_DEATH	GO_POSITIVE_REGULATION_OF_NEURON_DEATH		97	0.372259	1.34522	0.11068	0.221551	0.997	5172	tags=33%, list=9%, signal=36%
GO_HOMOPHILIC_CELL_ADHESION_VIA_PLASMA_MEMBRANE_ADHESION_MOLECULES	GO_HOMOPHILIC_CELL_ADHESION_VIA_PLASMA_MEMBRANE_ADHESION_MOLECULES		168	0.400869	1.34405	0.137255	0.222549	0.997	6659	tags=35%, list=12%, signal=40%
GO_NEGATIVE_REGULATION_OF_CYTOSKELETON_ORGANIZATION	GO_NEGATIVE_REGULATION_OF_CYTOSKELETON_ORGANIZATION		158	0.35619	1.34293	0.112403	0.22352	0.997	4467	tags=30%, list=8%, signal=32%
GO_NUCLEOTIDE_EXCISION_REPAIR_DNA_GAP_FILLING	GO_NUCLEOTIDE_EXCISION_REPAIR_DNA_GAP_FILLING		23	0.506801	1.34184	0.172557	0.224476	0.997	7683	tags=57%, list=14%, signal=66%
GO_NEGATIVE_REGULATION_OF_TELOMERE_MAINTENANCE	GO_NEGATIVE_REGULATION_OF_TELOMERE_MAINTENANCE		35	0.499139	1.34167	0.200397	0.224368	0.997	8657	tags=51%, list=16%, signal=61%
GO_REGULATION_OF_REACTIVE_OXYGEN_SPECIES_METABOLIC_PROCESS	GO_REGULATION_OF_REACTIVE_OXYGEN_SPECIES_METABOLIC_PROCESS		195	0.330766	1.34142	0.0891841	0.224349	0.997	7749	tags=37%, list=14%, signal=43%
GO_RESPONSE_TO_VITAMIN	GO_RESPONSE_TO_VITAMIN		91	0.362207	1.34065	0.0712871	0.224951	0.997	5025	tags=27%, list=9%, signal=30%
GO_MAST_CELL_ACTIVATION	GO_MAST_CELL_ACTIVATION		61	0.438243	1.33988	0.171315	0.225495	0.997	6058	tags=43%, list=11%, signal=48%
GO_REGULATION_OF_NERVOUS_SYSTEM_PROCESS	GO_REGULATION_OF_NERVOUS_SYSTEM_PROCESS		148	0.343325	1.33969	0.0797665	0.225423	0.997	3523	tags=26%, list=6%, signal=27%
GO_REGULATION_OF_ACTIN_CYTOSKELETON_REORGANIZATION	GO_REGULATION_OF_ACTIN_CYTOSKELETON_REORGANIZATION		39	0.401634	1.33932	0.132383	0.225517	0.997	5730	tags=38%, list=10%, signal=43%
GO_SYNAPTIC_VESICLE_RECYCLING	GO_SYNAPTIC_VESICLE_RECYCLING		74	0.387136	1.33911	0.112205	0.22543	0.997	4821	tags=36%, list=9%, signal=40%
GO_RESPONSE_TO_DOPAMINE	GO_RESPONSE_TO_DOPAMINE		91	0.350489	1.33851	0.0582329	0.225804	0.997	5485	tags=27%, list=10%, signal=30%
GO_POSITIVE_REGULATION_OF_CELLULAR_AMIDE_METABOLIC_PROCESS	GO_POSITIVE_REGULATION_OF_CELLULAR_AMIDE_METABOLIC_PROCESS		167	0.357385	1.33807	0.125498	0.225976	0.997	5159	tags=33%, list=9%, signal=36%
GO_ESTABLISHMENT_OF_TISSUE_POLARITY	GO_ESTABLISHMENT_OF_TISSUE_POLARITY		124	0.376945	1.33641	0.132114	0.227547	0.997	4649	tags=29%, list=8%, signal=32%
GO_DEFENSE_RESPONSE_TO_GRAM_NEGATIVE_BACTERIUM	GO_DEFENSE_RESPONSE_TO_GRAM_NEGATIVE_BACTERIUM		81	0.409016	1.33638	0.125498	0.227264	0.997	8636	tags=32%, list=16%, signal=38%
GO_NEGATIVE_REGULATION_OF_LYMPHOCYTE_APOPTOTIC_PROCESS	GO_NEGATIVE_REGULATION_OF_LYMPHOCYTE_APOPTOTIC_PROCESS		31	0.45289	1.33589	0.168297	0.227484	0.997	5523	tags=45%, list=10%, signal=50%
GO_NEGATIVE_REGULATION_OF_CHEMOKINE_PRODUCTION	GO_NEGATIVE_REGULATION_OF_CHEMOKINE_PRODUCTION		22	0.466026	1.33579	0.136273	0.227311	0.997	6340	tags=41%, list=11%, signal=46%
GO_RESPONSE_TO_ESTROGEN	GO_RESPONSE_TO_ESTROGEN		75	0.356395	1.33571	0.0905588	0.227079	0.997	5551	tags=33%, list=10%, signal=37%
GO_POSITIVE_REGULATION_OF_LEUKOCYTE_CHEMOTAXIS	GO_POSITIVE_REGULATION_OF_LEUKOCYTE_CHEMOTAXIS		96	0.401254	1.33511	0.151052	0.227479	0.997	5058	tags=40%, list=9%, signal=43%
GO_REGULATION_OF_TELOMERE_MAINTENANCE	GO_REGULATION_OF_TELOMERE_MAINTENANCE		79	0.440724	1.33507	0.192	0.227202	0.997	8657	tags=52%, list=16%, signal=61%
GO_NEURON_RECOGNITION	GO_NEURON_RECOGNITION		50	0.412974	1.33477	0.111531	0.227253	0.997	6100	tags=38%, list=11%, signal=43%
GO_POSITIVE_REGULATION_OF_VIRAL_TRANSCRIPTION	GO_POSITIVE_REGULATION_OF_VIRAL_TRANSCRIPTION		41	0.449619	1.33438	0.161426	0.22741	0.997	5225	tags=39%, list=9%, signal=43%
GO_POSITIVE_REGULATION_OF_ESTABLISHMENT_OF_PROTEIN_LOCALIZATION_TO_MITOCHONDRION	GO_POSITIVE_REGULATION_OF_ESTABLISHMENT_OF_PROTEIN_LOCALIZATION_TO_MITOCHONDRION		58	0.385423	1.33414	0.11575	0.227376	0.997	5997	tags=36%, list=11%, signal=41%
GO_PROTEIN_DESTABILIZATION	GO_PROTEIN_DESTABILIZATION		50	0.414279	1.33412	0.153992	0.227092	0.997	2367	tags=26%, list=4%, signal=27%
GO_CELLULAR_RESPONSE_TO_CARBOHYDRATE_STIMULUS	GO_CELLULAR_RESPONSE_TO_CARBOHYDRATE_STIMULUS		143	0.327597	1.33383	0.0592885	0.227141	0.997	4585	tags=29%, list=8%, signal=31%
GO_MAMMARY_GLAND_DEVELOPMENT	GO_MAMMARY_GLAND_DEVELOPMENT		142	0.341232	1.33337	0.0828625	0.227341	0.997	6146	tags=37%, list=11%, signal=42%
GO_PLATELET_AGGREGATION	GO_PLATELET_AGGREGATION		62	0.386691	1.33277	0.114173	0.227781	0.998	6003	tags=37%, list=11%, signal=42%
GO_CYTOKINE_PRODUCTION_INVOLVED_IN_INFLAMMATORY_RESPONSE	GO_CYTOKINE_PRODUCTION_INVOLVED_IN_INFLAMMATORY_RESPONSE		65	0.404067	1.33224	0.166344	0.22809	0.998	7417	tags=34%, list=13%, signal=39%
GO_RESPONSE_TO_COCAINE	GO_RESPONSE_TO_COCAINE		48	0.385996	1.33124	0.0968992	0.228988	0.998	5284	tags=33%, list=10%, signal=37%
GO_ANTIMICROBIAL_HUMORAL_RESPONSE	GO_ANTIMICROBIAL_HUMORAL_RESPONSE		137	0.402812	1.33046	0.108871	0.229584	0.998	10448	tags=46%, list=19%, signal=57%
GO_MATING_BEHAVIOR	GO_MATING_BEHAVIOR		23	0.444333	1.33014	0.100189	0.229609	0.998	4249	tags=35%, list=8%, signal=38%
GO_POSITIVE_REGULATION_OF_CELL_CYCLE_G1_S_PHASE_TRANSITION	GO_POSITIVE_REGULATION_OF_CELL_CYCLE_G1_S_PHASE_TRANSITION		58	0.38052	1.32915	0.131474	0.230445	0.998	3986	tags=24%, list=7%, signal=26%
GO_NEGATIVE_REGULATION_OF_PROTEIN_MATURATION	GO_NEGATIVE_REGULATION_OF_PROTEIN_MATURATION		33	0.408738	1.32913	0.116	0.230151	0.998	6742	tags=36%, list=12%, signal=41%
GO_PEPTIDYL_THREONINE_MODIFICATION	GO_PEPTIDYL_THREONINE_MODIFICATION		124	0.381821	1.32878	0.153992	0.230283	0.998	5302	tags=35%, list=10%, signal=39%
GO_EPITHELIAL_TUBE_FORMATION	GO_EPITHELIAL_TUBE_FORMATION		133	0.378525	1.32814	0.135755	0.230689	0.998	4467	tags=31%, list=8%, signal=33%
GO_REGULATION_OF_CELL_ADHESION_MEDIATED_BY_INTEGRIN	GO_REGULATION_OF_CELL_ADHESION_MEDIATED_BY_INTEGRIN		48	0.431316	1.32745	0.159136	0.231148	0.998	7501	tags=42%, list=14%, signal=48%
GO_NEGATIVE_REGULATION_OF_POSTTRANSCRIPTIONAL_GENE_SILENCING	GO_NEGATIVE_REGULATION_OF_POSTTRANSCRIPTIONAL_GENE_SILENCING		21	0.462008	1.32736	0.133459	0.230938	0.998	6346	tags=52%, list=11%, signal=59%
GO_REGULATION_OF_JUN_KINASE_ACTIVITY	GO_REGULATION_OF_JUN_KINASE_ACTIVITY		87	0.380726	1.32688	0.115163	0.23119	0.998	6387	tags=37%, list=12%, signal=42%
GO_REGULATION_OF_AUTOPHAGY_OF_MITOCHONDRION	GO_REGULATION_OF_AUTOPHAGY_OF_MITOCHONDRION		43	0.414387	1.3257	0.141473	0.232292	0.998	7524	tags=44%, list=14%, signal=51%
GO_REGULATION_OF_SPINDLE_ASSEMBLY	GO_REGULATION_OF_SPINDLE_ASSEMBLY		24	0.458204	1.32535	0.175197	0.232377	0.998	4745	tags=29%, list=9%, signal=32%
GO_TRANSFORMING_GROWTH_FACTOR_BETA_RECEPTOR_SIGNALING_PATHWAY	GO_TRANSFORMING_GROWTH_FACTOR_BETA_RECEPTOR_SIGNALING_PATHWAY		199	0.359037	1.32522	0.129032	0.232253	0.998	5342	tags=31%, list=10%, signal=34%
GO_OOCYTE_DIFFERENTIATION	GO_OOCYTE_DIFFERENTIATION		52	0.384041	1.32518	0.127907	0.231988	0.998	5024	tags=33%, list=9%, signal=36%
GO_POSITIVE_REGULATION_OF_TELOMERASE_ACTIVITY	GO_POSITIVE_REGULATION_OF_TELOMERASE_ACTIVITY		36	0.450673	1.32495	0.185336	0.231941	0.998	7414	tags=58%, list=13%, signal=67%
GO_NEGATIVE_REGULATION_OF_SMALL_GTPASE_MEDIATED_SIGNAL_TRANSDUCTION	GO_NEGATIVE_REGULATION_OF_SMALL_GTPASE_MEDIATED_SIGNAL_TRANSDUCTION		59	0.42692	1.32423	0.182178	0.232436	0.998	5809	tags=42%, list=10%, signal=47%
GO_TELOMERE_ORGANIZATION	GO_TELOMERE_ORGANIZATION		171	0.392278	1.32381	0.181087	0.232578	0.998	6663	tags=41%, list=12%, signal=46%
GO_RIBONUCLEOSIDE_MONOPHOSPHATE_METABOLIC_PROCESS	GO_RIBONUCLEOSIDE_MONOPHOSPHATE_METABOLIC_PROCESS		51	0.386015	1.3237	0.164271	0.232424	0.998	3716	tags=33%, list=7%, signal=36%
GO_NEGATIVE_REGULATION_OF_ANTIGEN_RECEPTOR_MEDIATED_SIGNALING_PATHWAY	GO_NEGATIVE_REGULATION_OF_ANTIGEN_RECEPTOR_MEDIATED_SIGNALING_PATHWAY		30	0.509767	1.32289	0.205285	0.233058	0.998	6502	tags=50%, list=12%, signal=57%
GO_CEREBRAL_CORTEX_CELL_MIGRATION	GO_CEREBRAL_CORTEX_CELL_MIGRATION		42	0.440025	1.32271	0.150794	0.232946	0.998	3611	tags=31%, list=7%, signal=33%
GO_REGULATION_OF_EXTRINSIC_APOPTOTIC_SIGNALING_PATHWAY_IN_ABSENCE_OF_LIGAND	GO_REGULATION_OF_EXTRINSIC_APOPTOTIC_SIGNALING_PATHWAY_IN_ABSENCE_OF_LIGAND		46	0.39441	1.32267	0.138462	0.232678	0.998	6346	tags=35%, list=11%, signal=39%
GO_CELLULAR_RESPONSE_TO_RADIATION	GO_CELLULAR_RESPONSE_TO_RADIATION		187	0.341107	1.32265	0.129524	0.232407	0.998	6844	tags=35%, list=12%, signal=40%
GO_FORMATION_OF_PRIMARY_GERM_LAYER	GO_FORMATION_OF_PRIMARY_GERM_LAYER		126	0.380897	1.32263	0.105368	0.23213	0.998	4548	tags=29%, list=8%, signal=32%
GO_POSITIVE_REGULATION_OF_ANTIGEN_RECEPTOR_MEDIATED_SIGNALING_PATHWAY	GO_POSITIVE_REGULATION_OF_ANTIGEN_RECEPTOR_MEDIATED_SIGNALING_PATHWAY		23	0.527115	1.32237	0.179283	0.232093	0.998	3375	tags=26%, list=6%, signal=28%
GO_DNA_GEOMETRIC_CHANGE	GO_DNA_GEOMETRIC_CHANGE		116	0.424998	1.3216	0.187747	0.232732	0.998	4829	tags=34%, list=9%, signal=37%
GO_CYTOSKELETON_DEPENDENT_CYTOKINESIS	GO_CYTOSKELETON_DEPENDENT_CYTOKINESIS		100	0.380649	1.31984	0.144231	0.2344	0.998	6170	tags=38%, list=11%, signal=43%
GO_VIRAL_GENOME_REPLICATION	GO_VIRAL_GENOME_REPLICATION		127	0.383365	1.31785	0.140288	0.236374	0.998	7279	tags=40%, list=13%, signal=46%
GO_REGULATION_OF_CHROMOSOME_SEGREGATION	GO_REGULATION_OF_CHROMOSOME_SEGREGATION		107	0.412566	1.31758	0.190855	0.236404	0.998	6036	tags=41%, list=11%, signal=46%
GO_CELL_JUNCTION_MAINTENANCE	GO_CELL_JUNCTION_MAINTENANCE		33	0.403095	1.31682	0.128713	0.236893	0.998	3884	tags=36%, list=7%, signal=39%
GO_NEGATIVE_REGULATION_OF_PROTEIN_POLYMERIZATION	GO_NEGATIVE_REGULATION_OF_PROTEIN_POLYMERIZATION		77	0.362625	1.3159	0.119772	0.237606	0.998	4467	tags=32%, list=8%, signal=35%
GO_SMOOTH_MUSCLE_CELL_MIGRATION	GO_SMOOTH_MUSCLE_CELL_MIGRATION		82	0.380186	1.31573	0.132265	0.237475	0.998	2957	tags=24%, list=5%, signal=26%
GO_POSITIVE_REGULATION_OF_STRESS_ACTIVATED_PROTEIN_KINASE_SIGNALING_CASCADE	GO_POSITIVE_REGULATION_OF_STRESS_ACTIVATED_PROTEIN_KINASE_SIGNALING_CASCADE		170	0.357391	1.31564	0.117083	0.237282	0.998	6455	tags=38%, list=12%, signal=42%
GO_EXTRACELLULAR_VESICLE_BIOGENESIS	GO_EXTRACELLULAR_VESICLE_BIOGENESIS		22	0.411872	1.31459	0.117417	0.23817	0.998	6306	tags=41%, list=11%, signal=46%
GO_POSITIVE_REGULATION_OF_PEPTIDYL_SERINE_PHOSPHORYLATION	GO_POSITIVE_REGULATION_OF_PEPTIDYL_SERINE_PHOSPHORYLATION		109	0.336489	1.31406	0.110057	0.238457	0.998	7369	tags=34%, list=13%, signal=39%
GO_FOREBRAIN_CELL_MIGRATION	GO_FOREBRAIN_CELL_MIGRATION		58	0.40271	1.31405	0.135755	0.238159	0.998	3611	tags=28%, list=7%, signal=29%
GO_POSITIVE_REGULATION_OF_AXON_EXTENSION	GO_POSITIVE_REGULATION_OF_AXON_EXTENSION		43	0.427828	1.31304	0.164384	0.238991	0.998	6306	tags=37%, list=11%, signal=42%
GO_REGULATION_OF_EPITHELIAL_TO_MESENCHYMAL_TRANSITION	GO_REGULATION_OF_EPITHELIAL_TO_MESENCHYMAL_TRANSITION		95	0.38534	1.3128	0.126733	0.23894	0.998	3986	tags=29%, list=7%, signal=32%
GO_POSITIVE_REGULATION_OF_MITOCHONDRIAL_OUTER_MEMBRANE_PERMEABILIZATION_INVOLVED_IN_APOPTOTIC_SIGNALING_PATHWAY	GO_POSITIVE_REGULATION_OF_MITOCHONDRIAL_OUTER_MEMBRANE_PERMEABILIZATION_INVOLVED_IN_APOPTOTIC_SIGNALING_PATHWAY		35	0.394632	1.3126	0.132827	0.238846	0.998	4950	tags=40%, list=9%, signal=44%
GO_SLEEP	GO_SLEEP		34	0.431697	1.31223	0.121212	0.238965	0.998	6822	tags=38%, list=12%, signal=44%
GO_CIRCADIAN_SLEEP_WAKE_CYCLE	GO_CIRCADIAN_SLEEP_WAKE_CYCLE		28	0.442982	1.31163	0.131474	0.239303	0.998	6822	tags=36%, list=12%, signal=41%
GO_NEGATIVE_REGULATION_OF_CELLULAR_RESPONSE_TO_GROWTH_FACTOR_STIMULUS	GO_NEGATIVE_REGULATION_OF_CELLULAR_RESPONSE_TO_GROWTH_FACTOR_STIMULUS		176	0.350685	1.30919	0.12476	0.24174	0.998	3978	tags=25%, list=7%, signal=27%
GO_MAMMARY_GLAND_DUCT_MORPHOGENESIS	GO_MAMMARY_GLAND_DUCT_MORPHOGENESIS		32	0.44653	1.30871	0.144487	0.241976	0.998	3894	tags=41%, list=7%, signal=44%
GO_AUTONOMIC_NERVOUS_SYSTEM_DEVELOPMENT	GO_AUTONOMIC_NERVOUS_SYSTEM_DEVELOPMENT		47	0.39649	1.3079	0.126984	0.242611	0.998	5979	tags=28%, list=11%, signal=31%
GO_AORTIC_VALVE_DEVELOPMENT	GO_AORTIC_VALVE_DEVELOPMENT		32	0.483484	1.30702	0.187243	0.243324	0.998	3163	tags=38%, list=6%, signal=40%
GO_NEGATIVE_REGULATION_OF_COAGULATION	GO_NEGATIVE_REGULATION_OF_COAGULATION		53	0.444576	1.30641	0.175676	0.243691	0.998	5879	tags=38%, list=11%, signal=42%
GO_RESPONSE_TO_AXON_INJURY	GO_RESPONSE_TO_AXON_INJURY		79	0.355871	1.30561	0.106589	0.244263	0.998	3372	tags=24%, list=6%, signal=26%
GO_REGULATION_OF_PHOSPHOLIPASE_C_ACTIVITY	GO_REGULATION_OF_PHOSPHOLIPASE_C_ACTIVITY		48	0.412209	1.30517	0.157588	0.244517	0.998	5682	tags=40%, list=10%, signal=44%
GO_POSITIVE_REGULATION_OF_TRANSFORMING_GROWTH_FACTOR_BETA_PRODUCTION	GO_POSITIVE_REGULATION_OF_TRANSFORMING_GROWTH_FACTOR_BETA_PRODUCTION		20	0.499396	1.30439	0.184524	0.245063	0.998	5764	tags=60%, list=10%, signal=67%
GO_REGULATION_OF_POSTSYNAPSE_ORGANIZATION	GO_REGULATION_OF_POSTSYNAPSE_ORGANIZATION		107	0.368819	1.30431	0.149425	0.244851	0.998	6011	tags=35%, list=11%, signal=39%
GO_POSITIVE_REGULATION_OF_VASCULAR_ASSOCIATED_SMOOTH_MUSCLE_CELL_PROLIFERATION	GO_POSITIVE_REGULATION_OF_VASCULAR_ASSOCIATED_SMOOTH_MUSCLE_CELL_PROLIFERATION		46	0.399332	1.30411	0.153119	0.244759	0.998	8512	tags=37%, list=15%, signal=44%
GO_TUBE_FORMATION	GO_TUBE_FORMATION		150	0.365593	1.30288	0.147793	0.245876	0.998	6349	tags=37%, list=11%, signal=41%
GO_REGULATION_OF_GLIAL_CELL_DIFFERENTIATION	GO_REGULATION_OF_GLIAL_CELL_DIFFERENTIATION		74	0.372809	1.30253	0.107143	0.24595	0.998	6744	tags=35%, list=12%, signal=40%
GO_REGULATION_OF_MYELOID_LEUKOCYTE_DIFFERENTIATION	GO_REGULATION_OF_MYELOID_LEUKOCYTE_DIFFERENTIATION		122	0.369113	1.30233	0.140873	0.245863	0.998	5487	tags=33%, list=10%, signal=36%
GO_POSITIVE_REGULATION_OF_CYTOKINE_PRODUCTION_INVOLVED_IN_INFLAMMATORY_RESPONSE	GO_POSITIVE_REGULATION_OF_CYTOKINE_PRODUCTION_INVOLVED_IN_INFLAMMATORY_RESPONSE		21	0.511679	1.30203	0.220039	0.245904	0.998	7126	tags=52%, list=13%, signal=60%
GO_POSITIVE_REGULATION_OF_DNA_METABOLIC_PROCESS	GO_POSITIVE_REGULATION_OF_DNA_METABOLIC_PROCESS		200	0.363762	1.30202	0.171598	0.245607	0.998	5849	tags=36%, list=11%, signal=40%
GO_POSITIVE_REGULATION_OF_CELLULAR_RESPONSE_TO_TRANSFORMING_GROWTH_FACTOR_BETA_STIMULUS	GO_POSITIVE_REGULATION_OF_CELLULAR_RESPONSE_TO_TRANSFORMING_GROWTH_FACTOR_BETA_STIMULUS		30	0.418263	1.30192	0.168906	0.245434	0.998	5342	tags=37%, list=10%, signal=41%
GO_TOOTH_MINERALIZATION	GO_TOOTH_MINERALIZATION		24	0.442614	1.30155	0.127883	0.245559	0.998	6111	tags=38%, list=11%, signal=42%
GO_NEGATIVE_REGULATION_OF_LEUKOCYTE_MEDIATED_IMMUNITY	GO_NEGATIVE_REGULATION_OF_LEUKOCYTE_MEDIATED_IMMUNITY		52	0.479587	1.29785	0.221095	0.249602	0.998	6565	tags=54%, list=12%, signal=61%
GO_POSITIVE_REGULATION_OF_ACTIN_FILAMENT_BUNDLE_ASSEMBLY	GO_POSITIVE_REGULATION_OF_ACTIN_FILAMENT_BUNDLE_ASSEMBLY		62	0.40097	1.29757	0.146497	0.249629	0.998	6080	tags=40%, list=11%, signal=45%
GO_TUMOR_NECROSIS_FACTOR_MEDIATED_SIGNALING_PATHWAY	GO_TUMOR_NECROSIS_FACTOR_MEDIATED_SIGNALING_PATHWAY		170	0.377495	1.2973	0.172549	0.249645	0.998	6346	tags=35%, list=11%, signal=40%
GO_MULTIVESICULAR_BODY_SORTING_PATHWAY	GO_MULTIVESICULAR_BODY_SORTING_PATHWAY		41	0.413162	1.29707	0.208247	0.249611	0.998	2739	tags=24%, list=5%, signal=26%
GO_TOLERANCE_INDUCTION	GO_TOLERANCE_INDUCTION		26	0.564472	1.29673	0.254032	0.249694	0.998	6308	tags=54%, list=11%, signal=61%
GO_REGULATION_OF_B_CELL_RECEPTOR_SIGNALING_PATHWAY	GO_REGULATION_OF_B_CELL_RECEPTOR_SIGNALING_PATHWAY		26	0.53589	1.29619	0.239766	0.250064	0.999	4777	tags=31%, list=9%, signal=34%
GO_TOLL_LIKE_RECEPTOR_9_SIGNALING_PATHWAY	GO_TOLL_LIKE_RECEPTOR_9_SIGNALING_PATHWAY		25	0.492021	1.29613	0.189189	0.249825	0.999	5083	tags=40%, list=9%, signal=44%
GO_POSITIVE_REGULATION_OF_VIRAL_LIFE_CYCLE	GO_POSITIVE_REGULATION_OF_VIRAL_LIFE_CYCLE		61	0.39395	1.29584	0.161538	0.249836	0.999	7583	tags=41%, list=14%, signal=47%
GO_RESPONSE_TO_INTERLEUKIN_7	GO_RESPONSE_TO_INTERLEUKIN_7		40	0.401301	1.29541	0.139059	0.250025	0.999	1499	tags=28%, list=3%, signal=28%
GO_POSITIVE_REGULATION_OF_PROTEIN_TARGETING_TO_MEMBRANE	GO_POSITIVE_REGULATION_OF_PROTEIN_TARGETING_TO_MEMBRANE		30	0.413306	1.29536	0.124748	0.249783	0.999	3611	tags=30%, list=7%, signal=32%
GO_RESPONSE_TO_FIBROBLAST_GROWTH_FACTOR	GO_RESPONSE_TO_FIBROBLAST_GROWTH_FACTOR		149	0.347712	1.29469	0.136622	0.250263	0.999	4197	tags=23%, list=8%, signal=25%
GO_CELLULAR_RESPONSE_TO_OSMOTIC_STRESS	GO_CELLULAR_RESPONSE_TO_OSMOTIC_STRESS		42	0.404651	1.29381	0.149712	0.250953	0.999	3650	tags=31%, list=7%, signal=33%
GO_LIVER_MORPHOGENESIS	GO_LIVER_MORPHOGENESIS		22	0.433484	1.29329	0.136449	0.251244	0.999	2078	tags=27%, list=4%, signal=28%
GO_DENDRITIC_SPINE_MORPHOGENESIS	GO_DENDRITIC_SPINE_MORPHOGENESIS		62	0.397764	1.29204	0.164751	0.252397	0.999	5839	tags=37%, list=11%, signal=41%
GO_POSITIVE_REGULATION_OF_RESPONSE_TO_WOUNDING	GO_POSITIVE_REGULATION_OF_RESPONSE_TO_WOUNDING		71	0.386169	1.29083	0.133874	0.253424	0.999	5681	tags=34%, list=10%, signal=38%
GO_POSITIVE_REGULATION_OF_NATURAL_KILLER_CELL_MEDIATED_IMMUNITY	GO_POSITIVE_REGULATION_OF_NATURAL_KILLER_CELL_MEDIATED_IMMUNITY		29	0.547404	1.29055	0.247423	0.253447	0.999	5889	tags=34%, list=11%, signal=39%
GO_REGULATION_OF_T_HELPER_17_TYPE_IMMUNE_RESPONSE	GO_REGULATION_OF_T_HELPER_17_TYPE_IMMUNE_RESPONSE		21	0.522313	1.2905	0.222222	0.253199	0.999	6839	tags=62%, list=12%, signal=71%
GO_REGULATION_OF_LAMELLIPODIUM_ORGANIZATION	GO_REGULATION_OF_LAMELLIPODIUM_ORGANIZATION		49	0.404662	1.29049	0.165085	0.252911	0.999	5640	tags=39%, list=10%, signal=43%
GO_GASTRULATION	GO_GASTRULATION		188	0.353393	1.29038	0.133858	0.252731	0.999	5902	tags=30%, list=11%, signal=34%
GO_REPRODUCTIVE_BEHAVIOR	GO_REPRODUCTIVE_BEHAVIOR		30	0.407338	1.28981	0.136882	0.253087	0.999	4249	tags=33%, list=8%, signal=36%
GO_LENS_MORPHOGENESIS_IN_CAMERA_TYPE_EYE	GO_LENS_MORPHOGENESIS_IN_CAMERA_TYPE_EYE		22	0.445665	1.28957	0.166667	0.253061	0.999	5533	tags=50%, list=10%, signal=56%
GO_CARDIAC_EPITHELIAL_TO_MESENCHYMAL_TRANSITION	GO_CARDIAC_EPITHELIAL_TO_MESENCHYMAL_TRANSITION		31	0.443385	1.28936	0.187625	0.252997	0.999	3989	tags=35%, list=7%, signal=38%
GO_REGULATION_OF_COAGULATION	GO_REGULATION_OF_COAGULATION		86	0.394826	1.28907	0.165029	0.253028	0.999	5879	tags=37%, list=11%, signal=42%
GO_LENS_FIBER_CELL_DIFFERENTIATION	GO_LENS_FIBER_CELL_DIFFERENTIATION		35	0.407068	1.28888	0.149712	0.252921	0.999	6995	tags=40%, list=13%, signal=46%
GO_CYTOPLASMIC_PATTERN_RECOGNITION_RECEPTOR_SIGNALING_PATHWAY_IN_RESPONSE_TO_VIRUS	GO_CYTOPLASMIC_PATTERN_RECOGNITION_RECEPTOR_SIGNALING_PATHWAY_IN_RESPONSE_TO_VIRUS		31	0.424815	1.28807	0.154004	0.253567	0.999	4826	tags=35%, list=9%, signal=39%
GO_NEGATIVE_REGULATION_OF_INTERLEUKIN_1_BETA_PRODUCTION	GO_NEGATIVE_REGULATION_OF_INTERLEUKIN_1_BETA_PRODUCTION		38	0.446764	1.28779	0.188525	0.253532	0.999	8541	tags=37%, list=15%, signal=44%
GO_CIRCADIAN_SLEEP_WAKE_CYCLE_SLEEP	GO_CIRCADIAN_SLEEP_WAKE_CYCLE_SLEEP		22	0.467219	1.28663	0.158824	0.25459	0.999	6822	tags=36%, list=12%, signal=41%
GO_REGULATION_OF_PROTEIN_IMPORT	GO_REGULATION_OF_PROTEIN_IMPORT		62	0.382737	1.28651	0.152805	0.254438	0.999	4431	tags=27%, list=8%, signal=30%
GO_SISTER_CHROMATID_SEGREGATION	GO_SISTER_CHROMATID_SEGREGATION		195	0.384404	1.28641	0.216634	0.254233	0.999	6447	tags=40%, list=12%, signal=45%
GO_MITOTIC_CYTOKINETIC_PROCESS	GO_MITOTIC_CYTOKINETIC_PROCESS		23	0.447119	1.28621	0.195473	0.254187	0.999	6170	tags=35%, list=11%, signal=39%
GO_RENAL_FILTRATION	GO_RENAL_FILTRATION		25	0.448564	1.28521	0.190196	0.255052	0.999	4401	tags=44%, list=8%, signal=48%
GO_RESPONSE_TO_UV	GO_RESPONSE_TO_UV		140	0.362158	1.28369	0.171875	0.256488	0.999	5686	tags=34%, list=10%, signal=38%
GO_REGULATION_OF_MESONEPHROS_DEVELOPMENT	GO_REGULATION_OF_MESONEPHROS_DEVELOPMENT		25	0.441049	1.28364	0.147573	0.256242	0.999	3433	tags=28%, list=6%, signal=30%
GO_INTERLEUKIN_1_MEDIATED_SIGNALING_PATHWAY	GO_INTERLEUKIN_1_MEDIATED_SIGNALING_PATHWAY		101	0.390899	1.28343	0.187867	0.256206	0.999	7895	tags=38%, list=14%, signal=44%
GO_POSITIVE_REGULATION_OF_JUN_KINASE_ACTIVITY	GO_POSITIVE_REGULATION_OF_JUN_KINASE_ACTIVITY		72	0.383414	1.28333	0.15444	0.256028	0.999	5861	tags=35%, list=11%, signal=39%
GO_NEURAL_CREST_CELL_MIGRATION	GO_NEURAL_CREST_CELL_MIGRATION		56	0.386735	1.28282	0.142308	0.256371	0.999	3126	tags=27%, list=6%, signal=28%
GO_POSITIVE_REGULATION_OF_PROTEIN_BINDING	GO_POSITIVE_REGULATION_OF_PROTEIN_BINDING		85	0.356292	1.28215	0.157895	0.256881	0.999	6236	tags=39%, list=11%, signal=44%
GO_NEGATIVE_REGULATION_OF_G_PROTEIN_COUPLED_RECEPTOR_SIGNALING_PATHWAY	GO_NEGATIVE_REGULATION_OF_G_PROTEIN_COUPLED_RECEPTOR_SIGNALING_PATHWAY		51	0.385929	1.28121	0.143133	0.257656	0.999	5681	tags=29%, list=10%, signal=33%
GO_POSITIVE_REGULATION_OF_SYNAPTIC_TRANSMISSION	GO_POSITIVE_REGULATION_OF_SYNAPTIC_TRANSMISSION		172	0.332935	1.28091	0.114286	0.257716	0.999	6569	tags=34%, list=12%, signal=39%
GO_POSITIVE_REGULATION_OF_CELL_CYCLE_PHASE_TRANSITION	GO_POSITIVE_REGULATION_OF_CELL_CYCLE_PHASE_TRANSITION		108	0.357767	1.28085	0.181452	0.257471	0.999	4008	tags=23%, list=7%, signal=25%
GO_OVARIAN_FOLLICLE_DEVELOPMENT	GO_OVARIAN_FOLLICLE_DEVELOPMENT		57	0.372782	1.28025	0.128968	0.257899	0.999	5459	tags=32%, list=10%, signal=35%
GO_NEGATIVE_REGULATION_OF_GENE_SILENCING	GO_NEGATIVE_REGULATION_OF_GENE_SILENCING		35	0.396924	1.27988	0.159223	0.258048	0.999	6381	tags=40%, list=12%, signal=45%
GO_REGULATION_OF_PROTEIN_LOCALIZATION_TO_SYNAPSE	GO_REGULATION_OF_PROTEIN_LOCALIZATION_TO_SYNAPSE		27	0.426907	1.27938	0.1611	0.258348	0.999	3894	tags=26%, list=7%, signal=28%
GO_ACTOMYOSIN_STRUCTURE_ORGANIZATION	GO_ACTOMYOSIN_STRUCTURE_ORGANIZATION		196	0.375898	1.27899	0.181287	0.258531	0.999	5764	tags=33%, list=10%, signal=37%
GO_GLYCOSPHINGOLIPID_BIOSYNTHETIC_PROCESS	GO_GLYCOSPHINGOLIPID_BIOSYNTHETIC_PROCESS		26	0.410704	1.27879	0.170213	0.258463	0.999	3529	tags=27%, list=6%, signal=29%
GO_MATURATION_OF_SSU_RRNA	GO_MATURATION_OF_SSU_RRNA		51	0.442929	1.27871	0.234672	0.258259	0.999	7278	tags=41%, list=13%, signal=47%
GO_LYSOSOMAL_TRANSPORT	GO_LYSOSOMAL_TRANSPORT		110	0.383463	1.27805	0.21875	0.258689	0.999	6774	tags=37%, list=12%, signal=42%
GO_NEGATIVE_REGULATION_OF_AUTOPHAGY	GO_NEGATIVE_REGULATION_OF_AUTOPHAGY		84	0.371966	1.27787	0.164356	0.258589	0.999	4479	tags=26%, list=8%, signal=28%
GO_RECEPTOR_CATABOLIC_PROCESS	GO_RECEPTOR_CATABOLIC_PROCESS		35	0.420582	1.27762	0.184314	0.25856	0.999	2845	tags=29%, list=5%, signal=30%
GO_PLACENTA_DEVELOPMENT	GO_PLACENTA_DEVELOPMENT		156	0.330875	1.27729	0.153398	0.25863	0.999	5969	tags=28%, list=11%, signal=31%
GO_REGULATION_OF_ACTIN_FILAMENT_BUNDLE_ASSEMBLY	GO_REGULATION_OF_ACTIN_FILAMENT_BUNDLE_ASSEMBLY		102	0.373757	1.27715	0.155242	0.2585	0.999	6080	tags=40%, list=11%, signal=45%
GO_OVULATION_CYCLE_PROCESS	GO_OVULATION_CYCLE_PROCESS		47	0.401363	1.27711	0.160714	0.258237	0.999	5551	tags=38%, list=10%, signal=43%
GO_NEGATIVE_REGULATION_OF_INTRINSIC_APOPTOTIC_SIGNALING_PATHWAY	GO_NEGATIVE_REGULATION_OF_INTRINSIC_APOPTOTIC_SIGNALING_PATHWAY		96	0.338001	1.27654	0.125	0.258643	0.999	5418	tags=32%, list=10%, signal=36%
GO_PURINE_NUCLEOSIDE_MONOPHOSPHATE_METABOLIC_PROCESS	GO_PURINE_NUCLEOSIDE_MONOPHOSPHATE_METABOLIC_PROCESS		40	0.382681	1.27621	0.177686	0.258722	0.999	3716	tags=30%, list=7%, signal=32%
GO_REGULATION_OF_ANION_TRANSMEMBRANE_TRANSPORT	GO_REGULATION_OF_ANION_TRANSMEMBRANE_TRANSPORT		32	0.410884	1.27606	0.164122	0.258604	0.999	4212	tags=38%, list=8%, signal=41%
GO_MAST_CELL_MEDIATED_IMMUNITY	GO_MAST_CELL_MEDIATED_IMMUNITY		49	0.427338	1.27484	0.211694	0.259709	0.999	7544	tags=51%, list=14%, signal=59%
GO_RESPONSE_TO_FUNGUS	GO_RESPONSE_TO_FUNGUS		54	0.402167	1.2747	0.170254	0.259565	0.999	6726	tags=31%, list=12%, signal=36%
GO_MONONUCLEAR_CELL_DIFFERENTIATION	GO_MONONUCLEAR_CELL_DIFFERENTIATION		38	0.415044	1.27442	0.172414	0.259557	0.999	3505	tags=32%, list=6%, signal=34%
GO_FIBROBLAST_MIGRATION	GO_FIBROBLAST_MIGRATION		46	0.405438	1.27371	0.189293	0.260116	0.999	5360	tags=41%, list=10%, signal=46%
GO_WALKING_BEHAVIOR	GO_WALKING_BEHAVIOR		29	0.407641	1.2735	0.11332	0.26005	0.999	3372	tags=34%, list=6%, signal=37%
GO_POSITIVE_REGULATION_OF_EXOCYTOSIS	GO_POSITIVE_REGULATION_OF_EXOCYTOSIS		91	0.328744	1.2729	0.111324	0.260424	0.999	5866	tags=31%, list=11%, signal=34%
GO_POSITIVE_REGULATION_OF_CELL_DIVISION	GO_POSITIVE_REGULATION_OF_CELL_DIVISION		87	0.352406	1.27284	0.130682	0.2602	0.999	7895	tags=44%, list=14%, signal=51%
GO_FEMALE_GAMETE_GENERATION	GO_FEMALE_GAMETE_GENERATION		142	0.339157	1.27281	0.142582	0.259948	0.999	6660	tags=32%, list=12%, signal=36%
GO_NEGATIVE_REGULATION_OF_CELLULAR_RESPONSE_TO_TRANSFORMING_GROWTH_FACTOR_BETA_STIMULUS	GO_NEGATIVE_REGULATION_OF_CELLULAR_RESPONSE_TO_TRANSFORMING_GROWTH_FACTOR_BETA_STIMULUS		87	0.368801	1.27268	0.167308	0.259814	0.999	5224	tags=31%, list=9%, signal=34%
GO_REGULATION_OF_B_CELL_MEDIATED_IMMUNITY	GO_REGULATION_OF_B_CELL_MEDIATED_IMMUNITY		56	0.423255	1.27253	0.215842	0.259682	0.999	6839	tags=46%, list=12%, signal=53%
GO_REGULATION_OF_UBIQUITIN_DEPENDENT_PROTEIN_CATABOLIC_PROCESS	GO_REGULATION_OF_UBIQUITIN_DEPENDENT_PROTEIN_CATABOLIC_PROCESS		158	0.349012	1.2716	0.172131	0.260479	0.999	6684	tags=35%, list=12%, signal=39%
GO_BLASTOCYST_DEVELOPMENT	GO_BLASTOCYST_DEVELOPMENT		104	0.348675	1.27098	0.154762	0.260862	0.999	7315	tags=34%, list=13%, signal=39%
GO_PROTEIN_DEPOLYMERIZATION	GO_PROTEIN_DEPOLYMERIZATION		115	0.357446	1.2704	0.172084	0.261202	0.999	6383	tags=36%, list=12%, signal=40%
GO_POLARIZED_EPITHELIAL_CELL_DIFFERENTIATION	GO_POLARIZED_EPITHELIAL_CELL_DIFFERENTIATION		22	0.429413	1.26993	0.188679	0.261468	0.999	5159	tags=45%, list=9%, signal=50%
GO_INACTIVATION_OF_MAPK_ACTIVITY	GO_INACTIVATION_OF_MAPK_ACTIVITY		26	0.449111	1.26991	0.189135	0.261198	0.999	7023	tags=42%, list=13%, signal=48%
GO_PROTEIN_LOCALIZATION_TO_CELL_JUNCTION	GO_PROTEIN_LOCALIZATION_TO_CELL_JUNCTION		105	0.338315	1.26961	0.138462	0.261235	0.999	4190	tags=30%, list=8%, signal=32%
GO_T_CELL_APOPTOTIC_PROCESS	GO_T_CELL_APOPTOTIC_PROCESS		49	0.398078	1.26915	0.207921	0.261437	0.999	5629	tags=39%, list=10%, signal=43%
GO_REGULATION_OF_ESTABLISHMENT_OR_MAINTENANCE_OF_CELL_POLARITY	GO_REGULATION_OF_ESTABLISHMENT_OR_MAINTENANCE_OF_CELL_POLARITY		25	0.475015	1.26889	0.228916	0.261433	0.999	5547	tags=44%, list=10%, signal=49%
GO_RESPONSE_TO_KETONE	GO_RESPONSE_TO_KETONE		200	0.316651	1.26815	0.125483	0.262028	0.999	4900	tags=28%, list=9%, signal=30%
GO_ASTROCYTE_DEVELOPMENT	GO_ASTROCYTE_DEVELOPMENT		44	0.395316	1.2674	0.162376	0.262622	1	7942	tags=41%, list=14%, signal=48%
GO_POSITIVE_REGULATION_OF_B_CELL_MEDIATED_IMMUNITY	GO_POSITIVE_REGULATION_OF_B_CELL_MEDIATED_IMMUNITY		40	0.437335	1.2673	0.225743	0.262456	1	6839	tags=45%, list=12%, signal=51%
GO_PROTEIN_LOCALIZATION_TO_CHROMOSOME	GO_PROTEIN_LOCALIZATION_TO_CHROMOSOME		84	0.426259	1.26695	0.258197	0.262557	1	8244	tags=49%, list=15%, signal=57%
GO_NEGATIVE_REGULATION_OF_RESPONSE_TO_CYTOKINE_STIMULUS	GO_NEGATIVE_REGULATION_OF_RESPONSE_TO_CYTOKINE_STIMULUS		81	0.349156	1.26682	0.145957	0.262409	1	6151	tags=27%, list=11%, signal=31%
GO_COTRANSLATIONAL_PROTEIN_TARGETING_TO_MEMBRANE	GO_COTRANSLATIONAL_PROTEIN_TARGETING_TO_MEMBRANE		105	0.553918	1.26582	0.294118	0.263325	1	8544	tags=60%, list=15%, signal=71%
GO_REGULATION_OF_EMBRYONIC_DEVELOPMENT	GO_REGULATION_OF_EMBRYONIC_DEVELOPMENT		133	0.361503	1.26501	0.162476	0.263985	1	5969	tags=32%, list=11%, signal=35%
GO_POSITIVE_REGULATION_OF_OSTEOCLAST_DIFFERENTIATION	GO_POSITIVE_REGULATION_OF_OSTEOCLAST_DIFFERENTIATION		27	0.459692	1.26497	0.206226	0.26372	1	6768	tags=48%, list=12%, signal=55%
GO_HISTONE_PHOSPHORYLATION	GO_HISTONE_PHOSPHORYLATION		40	0.40139	1.26395	0.18251	0.264621	1	6177	tags=48%, list=11%, signal=53%
GO_NEGATIVE_REGULATION_OF_OXIDATIVE_STRESS_INDUCED_NEURON_DEATH	GO_NEGATIVE_REGULATION_OF_OXIDATIVE_STRESS_INDUCED_NEURON_DEATH		21	0.432973	1.26375	0.183128	0.264526	1	6814	tags=48%, list=12%, signal=54%
GO_MITOTIC_METAPHASE_PLATE_CONGRESSION	GO_MITOTIC_METAPHASE_PLATE_CONGRESSION		46	0.425255	1.26354	0.234343	0.264479	1	6306	tags=46%, list=11%, signal=51%
GO_LAMELLIPODIUM_ORGANIZATION	GO_LAMELLIPODIUM_ORGANIZATION		85	0.376237	1.26353	0.183712	0.264194	1	5989	tags=39%, list=11%, signal=43%
GO_RESPONSE_TO_EPIDERMAL_GROWTH_FACTOR	GO_RESPONSE_TO_EPIDERMAL_GROWTH_FACTOR		47	0.412487	1.2633	0.208748	0.264165	1	3781	tags=36%, list=7%, signal=39%
GO_BLASTOCYST_GROWTH	GO_BLASTOCYST_GROWTH		20	0.496835	1.26257	0.244275	0.264725	1	4829	tags=40%, list=9%, signal=44%
GO_SISTER_CHROMATID_COHESION	GO_SISTER_CHROMATID_COHESION		63	0.426385	1.26163	0.231225	0.265556	1	6447	tags=38%, list=12%, signal=43%
GO_ACTIVATION_OF_PHOSPHOLIPASE_C_ACTIVITY	GO_ACTIVATION_OF_PHOSPHOLIPASE_C_ACTIVITY		34	0.422815	1.2606	0.184466	0.266426	1	5682	tags=38%, list=10%, signal=43%
GO_POSITIVE_REGULATION_OF_JNK_CASCADE	GO_POSITIVE_REGULATION_OF_JNK_CASCADE		136	0.352961	1.26013	0.159696	0.266674	1	6455	tags=37%, list=12%, signal=42%
GO_RESPONSE_TO_DEXAMETHASONE	GO_RESPONSE_TO_DEXAMETHASONE		41	0.378943	1.25854	0.168959	0.268278	1	3831	tags=27%, list=7%, signal=29%
GO_RESPONSE_TO_ACID_CHEMICAL	GO_RESPONSE_TO_ACID_CHEMICAL		131	0.325946	1.25832	0.132797	0.268234	1	6346	tags=34%, list=11%, signal=39%
GO_DETECTION_OF_STIMULUS_INVOLVED_IN_SENSORY_PERCEPTION_OF_PAIN	GO_DETECTION_OF_STIMULUS_INVOLVED_IN_SENSORY_PERCEPTION_OF_PAIN		25	0.427354	1.2581	0.165669	0.268186	1	3498	tags=24%, list=6%, signal=26%
GO_REGULATION_OF_CYTOKINESIS	GO_REGULATION_OF_CYTOKINESIS		90	0.387676	1.2577	0.207619	0.268345	1	6487	tags=40%, list=12%, signal=45%
GO_SELECTIVE_AUTOPHAGY	GO_SELECTIVE_AUTOPHAGY		61	0.387529	1.25697	0.213307	0.26891	1	5095	tags=33%, list=9%, signal=36%
GO_LYMPHOCYTE_HOMEOSTASIS	GO_LYMPHOCYTE_HOMEOSTASIS		62	0.433336	1.25643	0.247059	0.269257	1	5322	tags=39%, list=10%, signal=43%
GO_MEMBRANE_LIPID_CATABOLIC_PROCESS	GO_MEMBRANE_LIPID_CATABOLIC_PROCESS		38	0.384987	1.2559	0.16047	0.269546	1	1527	tags=21%, list=3%, signal=22%
GO_POSITIVE_REGULATION_OF_TELOMERE_MAINTENANCE	GO_POSITIVE_REGULATION_OF_TELOMERE_MAINTENANCE		51	0.41401	1.25576	0.238	0.269412	1	8657	tags=53%, list=16%, signal=63%
GO_POSITIVE_REGULATION_OF_MITOCHONDRION_ORGANIZATION	GO_POSITIVE_REGULATION_OF_MITOCHONDRION_ORGANIZATION		119	0.331283	1.25576	0.148077	0.269119	1	6115	tags=35%, list=11%, signal=40%
GO_POSITIVE_REGULATION_OF_CELLULAR_PROTEIN_CATABOLIC_PROCESS	GO_POSITIVE_REGULATION_OF_CELLULAR_PROTEIN_CATABOLIC_PROCESS		148	0.336317	1.25542	0.173307	0.269224	1	3677	tags=25%, list=7%, signal=27%
GO_NEURON_PROJECTION_EXTENSION_INVOLVED_IN_NEURON_PROJECTION_GUIDANCE	GO_NEURON_PROJECTION_EXTENSION_INVOLVED_IN_NEURON_PROJECTION_GUIDANCE		37	0.429022	1.25524	0.205128	0.269134	1	6100	tags=41%, list=11%, signal=46%
GO_REGULATION_OF_DNA_REPLICATION	GO_REGULATION_OF_DNA_REPLICATION		112	0.384904	1.25456	0.230019	0.269661	1	6395	tags=38%, list=12%, signal=43%
GO_NEGATIVE_REGULATION_OF_PROTEIN_ACETYLATION	GO_NEGATIVE_REGULATION_OF_PROTEIN_ACETYLATION		23	0.394928	1.25289	0.152941	0.271361	1	5374	tags=43%, list=10%, signal=48%
GO_ESTABLISHMENT_OF_CELL_POLARITY	GO_ESTABLISHMENT_OF_CELL_POLARITY		141	0.365369	1.25205	0.198864	0.272055	1	5667	tags=34%, list=10%, signal=38%
GO_POSITIVE_REGULATION_OF_NATURAL_KILLER_CELL_MEDIATED_CYTOTOXICITY	GO_POSITIVE_REGULATION_OF_NATURAL_KILLER_CELL_MEDIATED_CYTOTOXICITY		24	0.542697	1.25185	0.283673	0.27199	1	10781	tags=50%, list=19%, signal=62%
GO_MAINTENANCE_OF_PROTEIN_LOCATION	GO_MAINTENANCE_OF_PROTEIN_LOCATION		92	0.346036	1.25141	0.199609	0.272234	1	5973	tags=37%, list=11%, signal=41%
GO_DNA_SYNTHESIS_INVOLVED_IN_DNA_REPAIR	GO_DNA_SYNTHESIS_INVOLVED_IN_DNA_REPAIR		53	0.394378	1.25105	0.216433	0.272358	1	5158	tags=34%, list=9%, signal=37%
GO_EMBRYONIC_PLACENTA_DEVELOPMENT	GO_EMBRYONIC_PLACENTA_DEVELOPMENT		89	0.34922	1.251	0.171154	0.272115	1	5969	tags=30%, list=11%, signal=34%
GO_REGULATION_OF_ACTOMYOSIN_STRUCTURE_ORGANIZATION	GO_REGULATION_OF_ACTOMYOSIN_STRUCTURE_ORGANIZATION		99	0.365927	1.25095	0.196356	0.271888	1	5764	tags=37%, list=10%, signal=42%
GO_T_CELL_LINEAGE_COMMITMENT	GO_T_CELL_LINEAGE_COMMITMENT		28	0.489434	1.25057	0.253465	0.272037	1	5763	tags=43%, list=10%, signal=48%
GO_REGULATION_OF_DNA_BINDING	GO_REGULATION_OF_DNA_BINDING		123	0.32522	1.25053	0.148728	0.271807	1	6322	tags=31%, list=11%, signal=35%
GO_T_HELPER_17_TYPE_IMMUNE_RESPONSE	GO_T_HELPER_17_TYPE_IMMUNE_RESPONSE		30	0.470256	1.25041	0.241176	0.271648	1	6839	tags=50%, list=12%, signal=57%
GO_RECEPTOR_INTERNALIZATION	GO_RECEPTOR_INTERNALIZATION		115	0.330324	1.24997	0.146484	0.271894	1	5258	tags=32%, list=9%, signal=35%
GO_CHROMOSOME_LOCALIZATION	GO_CHROMOSOME_LOCALIZATION		78	0.388178	1.24942	0.224652	0.272211	1	6306	tags=42%, list=11%, signal=48%
GO_POSITIVE_REGULATION_OF_CYTOKINESIS	GO_POSITIVE_REGULATION_OF_CYTOKINESIS		40	0.415259	1.24792	0.181474	0.273658	1	7567	tags=45%, list=14%, signal=52%
GO_POSITIVE_REGULATION_OF_MITOTIC_CELL_CYCLE	GO_POSITIVE_REGULATION_OF_MITOTIC_CELL_CYCLE		166	0.344533	1.24682	0.206759	0.274605	1	6400	tags=33%, list=12%, signal=37%
GO_REGULATION_OF_RAS_PROTEIN_SIGNAL_TRANSDUCTION	GO_REGULATION_OF_RAS_PROTEIN_SIGNAL_TRANSDUCTION		194	0.353112	1.24681	0.190291	0.274313	1	6707	tags=37%, list=12%, signal=42%
GO_LEUKOCYTE_HOMEOSTASIS	GO_LEUKOCYTE_HOMEOSTASIS		86	0.407045	1.24666	0.236686	0.274194	1	5322	tags=36%, list=10%, signal=40%
GO_MITOTIC_SISTER_CHROMATID_SEGREGATION	GO_MITOTIC_SISTER_CHROMATID_SEGREGATION		160	0.377959	1.24649	0.253411	0.274085	1	6383	tags=41%, list=12%, signal=46%
GO_CELLULAR_GLUCOSE_HOMEOSTASIS	GO_CELLULAR_GLUCOSE_HOMEOSTASIS		151	0.303252	1.24628	0.12024	0.274014	1	5654	tags=32%, list=10%, signal=35%
GO_NEGATIVE_REGULATION_OF_PROTEIN_CATABOLIC_PROCESS	GO_NEGATIVE_REGULATION_OF_PROTEIN_CATABOLIC_PROCESS		132	0.336323	1.24618	0.169697	0.273852	1	6435	tags=35%, list=12%, signal=39%
GO_TRANSCRIPTION_BY_RNA_POLYMERASE_I	GO_TRANSCRIPTION_BY_RNA_POLYMERASE_I		66	0.392741	1.24532	0.230924	0.274658	1	4520	tags=26%, list=8%, signal=28%
GO_NEGATIVE_REGULATION_OF_ADAPTIVE_IMMUNE_RESPONSE	GO_NEGATIVE_REGULATION_OF_ADAPTIVE_IMMUNE_RESPONSE		48	0.444085	1.24442	0.244048	0.275477	1	7963	tags=54%, list=14%, signal=63%
GO_NEGATIVE_REGULATION_OF_CELL_GROWTH	GO_NEGATIVE_REGULATION_OF_CELL_GROWTH		190	0.304533	1.24435	0.137546	0.27525	1	6100	tags=30%, list=11%, signal=34%
GO_POSITIVE_REGULATION_OF_STRIATED_MUSCLE_CELL_DIFFERENTIATION	GO_POSITIVE_REGULATION_OF_STRIATED_MUSCLE_CELL_DIFFERENTIATION		67	0.377784	1.24431	0.196881	0.274992	1	5828	tags=31%, list=11%, signal=35%
GO_POSITIVE_REGULATION_OF_MYELOID_CELL_DIFFERENTIATION	GO_POSITIVE_REGULATION_OF_MYELOID_CELL_DIFFERENTIATION		101	0.363152	1.24355	0.188462	0.275602	1	5190	tags=30%, list=9%, signal=33%
GO_RENAL_VESICLE_DEVELOPMENT	GO_RENAL_VESICLE_DEVELOPMENT		20	0.428044	1.24316	0.18146	0.27578	1	4125	tags=40%, list=7%, signal=43%
GO_POSITIVE_REGULATION_OF_WOUND_HEALING	GO_POSITIVE_REGULATION_OF_WOUND_HEALING		59	0.381179	1.24267	0.182731	0.276028	1	5681	tags=36%, list=10%, signal=40%
GO_MITOTIC_G2_DNA_DAMAGE_CHECKPOINT	GO_MITOTIC_G2_DNA_DAMAGE_CHECKPOINT		23	0.459608	1.24252	0.242798	0.275927	1	6844	tags=39%, list=12%, signal=45%
GO_BETA_CATENIN_DESTRUCTION_COMPLEX_DISASSEMBLY	GO_BETA_CATENIN_DESTRUCTION_COMPLEX_DISASSEMBLY		21	0.440511	1.24202	0.213147	0.2762	1	2543	tags=24%, list=5%, signal=25%
GO_LABYRINTHINE_LAYER_BLOOD_VESSEL_DEVELOPMENT	GO_LABYRINTHINE_LAYER_BLOOD_VESSEL_DEVELOPMENT		21	0.399331	1.24179	0.177606	0.276167	1	3989	tags=33%, list=7%, signal=36%
GO_INTERMEDIATE_FILAMENT_BASED_PROCESS	GO_INTERMEDIATE_FILAMENT_BASED_PROCESS		51	0.39498	1.2417	0.190855	0.275967	1	2650	tags=27%, list=5%, signal=29%
GO_POSITIVE_REGULATION_OF_DNA_TEMPLATED_TRANSCRIPTION_ELONGATION	GO_POSITIVE_REGULATION_OF_DNA_TEMPLATED_TRANSCRIPTION_ELONGATION		27	0.464731	1.24135	0.262626	0.276086	1	5225	tags=22%, list=9%, signal=25%
GO_NEGATIVE_REGULATION_OF_ERBB_SIGNALING_PATHWAY	GO_NEGATIVE_REGULATION_OF_ERBB_SIGNALING_PATHWAY		52	0.384037	1.24128	0.208835	0.275869	1	6138	tags=40%, list=11%, signal=45%
GO_NEURAL_TUBE_DEVELOPMENT	GO_NEURAL_TUBE_DEVELOPMENT		163	0.352433	1.24123	0.211027	0.27562	1	4870	tags=28%, list=9%, signal=31%
GO_MITOTIC_SPINDLE_ORGANIZATION	GO_MITOTIC_SPINDLE_ORGANIZATION		117	0.389892	1.24111	0.264591	0.27548	1	5940	tags=37%, list=11%, signal=41%
GO_CELLULAR_RESPONSE_TO_ACID_CHEMICAL	GO_CELLULAR_RESPONSE_TO_ACID_CHEMICAL		75	0.337847	1.24039	0.175097	0.276077	1	5002	tags=33%, list=9%, signal=37%
GO_ADRENAL_GLAND_DEVELOPMENT	GO_ADRENAL_GLAND_DEVELOPMENT		24	0.415631	1.23931	0.184739	0.277121	1	6597	tags=38%, list=12%, signal=43%
GO_PLATELET_ACTIVATION	GO_PLATELET_ACTIVATION		158	0.355623	1.23902	0.192607	0.277152	1	6003	tags=39%, list=11%, signal=44%
GO_REGULATION_OF_MITOCHONDRION_ORGANIZATION	GO_REGULATION_OF_MITOCHONDRION_ORGANIZATION		191	0.319155	1.23885	0.170172	0.277046	1	5810	tags=32%, list=10%, signal=36%
GO_CELLULAR_RESPONSE_TO_REACTIVE_OXYGEN_SPECIES	GO_CELLULAR_RESPONSE_TO_REACTIVE_OXYGEN_SPECIES		162	0.315387	1.23876	0.162325	0.276879	1	5411	tags=32%, list=10%, signal=35%
GO_EXTRACELLULAR_MATRIX_ASSEMBLY	GO_EXTRACELLULAR_MATRIX_ASSEMBLY		42	0.422368	1.23871	0.234252	0.276658	1	4401	tags=29%, list=8%, signal=31%
GO_RETROGRADE_TRANSPORT_ENDOSOME_TO_PLASMA_MEMBRANE	GO_RETROGRADE_TRANSPORT_ENDOSOME_TO_PLASMA_MEMBRANE		30	0.408907	1.23756	0.200803	0.277751	1	6371	tags=43%, list=11%, signal=49%
GO_FEMALE_SEX_DIFFERENTIATION	GO_FEMALE_SEX_DIFFERENTIATION		119	0.342538	1.23709	0.148077	0.278038	1	5551	tags=32%, list=10%, signal=35%
GO_RESPONSE_TO_CORTICOSTEROID	GO_RESPONSE_TO_CORTICOSTEROID		164	0.312937	1.23654	0.126437	0.278434	1	3928	tags=22%, list=7%, signal=24%
GO_NEGATIVE_REGULATION_OF_CYTOKINE_PRODUCTION_INVOLVED_IN_IMMUNE_RESPONSE	GO_NEGATIVE_REGULATION_OF_CYTOKINE_PRODUCTION_INVOLVED_IN_IMMUNE_RESPONSE		24	0.467979	1.23547	0.238569	0.279408	1	6346	tags=46%, list=11%, signal=52%
GO_MICROTUBULE_CYTOSKELETON_ORGANIZATION_INVOLVED_IN_MITOSIS	GO_MICROTUBULE_CYTOSKELETON_ORGANIZATION_INVOLVED_IN_MITOSIS		143	0.388963	1.23547	0.261386	0.279116	1	6036	tags=37%, list=11%, signal=41%
GO_REGULATION_OF_REGULATED_SECRETORY_PATHWAY	GO_REGULATION_OF_REGULATED_SECRETORY_PATHWAY		162	0.319739	1.23543	0.156863	0.278867	1	7544	tags=40%, list=14%, signal=46%
GO_MACROPHAGE_DIFFERENTIATION	GO_MACROPHAGE_DIFFERENTIATION		46	0.412944	1.23525	0.237624	0.278802	1	7378	tags=48%, list=13%, signal=55%
GO_CELLULAR_RESPONSE_TO_FATTY_ACID	GO_CELLULAR_RESPONSE_TO_FATTY_ACID		55	0.354199	1.23491	0.153101	0.278941	1	4900	tags=35%, list=9%, signal=38%
GO_NEGATIVE_REGULATION_OF_DNA_BIOSYNTHETIC_PROCESS	GO_NEGATIVE_REGULATION_OF_DNA_BIOSYNTHETIC_PROCESS		38	0.383476	1.23486	0.225508	0.278713	1	4745	tags=34%, list=9%, signal=37%
GO_REGULATION_OF_PROTEIN_CONTAINING_COMPLEX_DISASSEMBLY	GO_REGULATION_OF_PROTEIN_CONTAINING_COMPLEX_DISASSEMBLY		122	0.352851	1.23447	0.210832	0.278878	1	4334	tags=28%, list=8%, signal=30%
GO_REGULATION_OF_HAIR_CYCLE	GO_REGULATION_OF_HAIR_CYCLE		29	0.413456	1.23442	0.193548	0.278634	1	3894	tags=28%, list=7%, signal=30%
GO_REGULATION_OF_TRANSCRIPTION_BY_RNA_POLYMERASE_I	GO_REGULATION_OF_TRANSCRIPTION_BY_RNA_POLYMERASE_I		31	0.418157	1.23209	0.232465	0.281128	1	3554	tags=26%, list=6%, signal=28%
GO_POSITIVE_REGULATION_OF_GLIAL_CELL_DIFFERENTIATION	GO_POSITIVE_REGULATION_OF_GLIAL_CELL_DIFFERENTIATION		43	0.371181	1.23187	0.190661	0.281086	1	5980	tags=37%, list=11%, signal=42%
GO_FOCAL_ADHESION_ASSEMBLY	GO_FOCAL_ADHESION_ASSEMBLY		83	0.379981	1.23087	0.265226	0.281987	1	3457	tags=33%, list=6%, signal=35%
GO_REGULATION_OF_PROTEIN_SUMOYLATION	GO_REGULATION_OF_PROTEIN_SUMOYLATION		26	0.434858	1.22968	0.230769	0.283108	1	2319	tags=27%, list=4%, signal=28%
GO_PROTEIN_INSERTION_INTO_MITOCHONDRIAL_MEMBRANE_INVOLVED_IN_APOPTOTIC_SIGNALING_PATHWAY	GO_PROTEIN_INSERTION_INTO_MITOCHONDRIAL_MEMBRANE_INVOLVED_IN_APOPTOTIC_SIGNALING_PATHWAY		30	0.397271	1.22949	0.211832	0.283051	1	4950	tags=43%, list=9%, signal=48%
GO_MAINTENANCE_OF_BLOOD_BRAIN_BARRIER	GO_MAINTENANCE_OF_BLOOD_BRAIN_BARRIER		34	0.407106	1.22824	0.249493	0.284295	1	3313	tags=44%, list=6%, signal=47%
GO_INOSITOL_PHOSPHATE_BIOSYNTHETIC_PROCESS	GO_INOSITOL_PHOSPHATE_BIOSYNTHETIC_PROCESS		28	0.394546	1.22789	0.177388	0.284427	1	5681	tags=32%, list=10%, signal=36%
GO_REGULATION_OF_PEPTIDYL_SERINE_PHOSPHORYLATION_OF_STAT_PROTEIN	GO_REGULATION_OF_PEPTIDYL_SERINE_PHOSPHORYLATION_OF_STAT_PROTEIN		23	0.395592	1.22739	0.198745	0.284717	1	10513	tags=35%, list=19%, signal=43%
GO_LOCOMOTORY_BEHAVIOR	GO_LOCOMOTORY_BEHAVIOR		198	0.3084	1.22738	0.127863	0.284448	1	4535	tags=25%, list=8%, signal=27%
GO_PYRIMIDINE_NUCLEOSIDE_CATABOLIC_PROCESS	GO_PYRIMIDINE_NUCLEOSIDE_CATABOLIC_PROCESS		23	0.44533	1.2273	0.208163	0.28426	1	6900	tags=52%, list=12%, signal=60%
GO_MODULATION_BY_SYMBIONT_OF_HOST_CELLULAR_PROCESS	GO_MODULATION_BY_SYMBIONT_OF_HOST_CELLULAR_PROCESS		26	0.410321	1.22681	0.214552	0.284539	1	4832	tags=31%, list=9%, signal=34%
GO_REGULATION_OF_HAIR_FOLLICLE_DEVELOPMENT	GO_REGULATION_OF_HAIR_FOLLICLE_DEVELOPMENT		21	0.452902	1.22627	0.199234	0.284891	1	3894	tags=33%, list=7%, signal=36%
GO_POSITIVE_REGULATION_OF_CELL_SUBSTRATE_ADHESION	GO_POSITIVE_REGULATION_OF_CELL_SUBSTRATE_ADHESION		122	0.34079	1.22615	0.204461	0.284753	1	4270	tags=26%, list=8%, signal=28%
GO_REGULATION_OF_ODONTOGENESIS	GO_REGULATION_OF_ODONTOGENESIS		27	0.428865	1.22606	0.219231	0.284547	1	2934	tags=26%, list=5%, signal=27%
GO_REGULATION_OF_CELL_DIVISION	GO_REGULATION_OF_CELL_DIVISION		171	0.330901	1.22592	0.187739	0.284432	1	6487	tags=36%, list=12%, signal=41%
GO_AMYLOID_PRECURSOR_PROTEIN_METABOLIC_PROCESS	GO_AMYLOID_PRECURSOR_PROTEIN_METABOLIC_PROCESS		70	0.341591	1.22565	0.187377	0.284457	1	6371	tags=36%, list=11%, signal=40%
GO_ESTABLISHMENT_OF_PROTEIN_LOCALIZATION_TO_CHROMOSOME	GO_ESTABLISHMENT_OF_PROTEIN_LOCALIZATION_TO_CHROMOSOME		27	0.452824	1.22561	0.269147	0.284203	1	10021	tags=59%, list=18%, signal=72%
GO_MATURATION_OF_5_8S_RRNA	GO_MATURATION_OF_5_8S_RRNA		36	0.426183	1.22559	0.274194	0.283934	1	8943	tags=44%, list=16%, signal=53%
GO_REGULATION_OF_ESTABLISHMENT_OF_PROTEIN_LOCALIZATION_TO_MITOCHONDRION	GO_REGULATION_OF_ESTABLISHMENT_OF_PROTEIN_LOCALIZATION_TO_MITOCHONDRION		73	0.34322	1.2252	0.201507	0.284131	1	3781	tags=29%, list=7%, signal=31%
GO_POSITIVE_REGULATION_OF_PHOSPHATIDYLINOSITOL_3_KINASE_SIGNALING	GO_POSITIVE_REGULATION_OF_PHOSPHATIDYLINOSITOL_3_KINASE_SIGNALING		87	0.36253	1.22446	0.205128	0.284759	1	7531	tags=38%, list=14%, signal=44%
GO_REGULATION_OF_DENDRITIC_SPINE_MORPHOGENESIS	GO_REGULATION_OF_DENDRITIC_SPINE_MORPHOGENESIS		48	0.39077	1.22437	0.232422	0.2846	1	5533	tags=35%, list=10%, signal=39%
GO_REGULATION_OF_DENDRITIC_SPINE_DEVELOPMENT	GO_REGULATION_OF_DENDRITIC_SPINE_DEVELOPMENT		78	0.38315	1.22428	0.254941	0.284446	1	5812	tags=37%, list=10%, signal=41%
GO_ACTIVATION_OF_GTPASE_ACTIVITY	GO_ACTIVATION_OF_GTPASE_ACTIVITY		108	0.355356	1.22412	0.229703	0.284336	1	4554	tags=29%, list=8%, signal=31%
GO_HEART_VALVE_DEVELOPMENT	GO_HEART_VALVE_DEVELOPMENT		60	0.402151	1.22408	0.229839	0.284085	1	3401	tags=32%, list=6%, signal=34%
GO_CYTOPLASMIC_TRANSLATION	GO_CYTOPLASMIC_TRANSLATION		103	0.408953	1.2235	0.279167	0.284505	1	7460	tags=42%, list=13%, signal=48%
GO_MITOTIC_SISTER_CHROMATID_COHESION	GO_MITOTIC_SISTER_CHROMATID_COHESION		26	0.477154	1.22318	0.271429	0.284618	1	5302	tags=42%, list=10%, signal=47%
GO_ANTIGEN_PROCESSING_AND_PRESENTATION_OF_EXOGENOUS_PEPTIDE_ANTIGEN_VIA_MHC_CLASS_I	GO_ANTIGEN_PROCESSING_AND_PRESENTATION_OF_EXOGENOUS_PEPTIDE_ANTIGEN_VIA_MHC_CLASS_I		80	0.438007	1.22275	0.264228	0.284821	1	6154	tags=39%, list=11%, signal=44%
GO_REGULATION_OF_MUSCLE_HYPERTROPHY	GO_REGULATION_OF_MUSCLE_HYPERTROPHY		66	0.348826	1.22252	0.178161	0.284826	1	4483	tags=23%, list=8%, signal=25%
GO_POSTSYNAPTIC_SIGNAL_TRANSDUCTION	GO_POSTSYNAPTIC_SIGNAL_TRANSDUCTION		36	0.405392	1.22085	0.213052	0.286486	1	6556	tags=39%, list=12%, signal=44%
GO_REGULATION_OF_ACTIN_FILAMENT_BASED_MOVEMENT	GO_REGULATION_OF_ACTIN_FILAMENT_BASED_MOVEMENT		44	0.368855	1.22072	0.20202	0.286357	1	4857	tags=30%, list=9%, signal=32%
GO_REGULATION_OF_NUCLEOCYTOPLASMIC_TRANSPORT	GO_REGULATION_OF_NUCLEOCYTOPLASMIC_TRANSPORT		112	0.359311	1.21831	0.235294	0.288838	1	5251	tags=29%, list=9%, signal=32%
GO_ESTABLISHMENT_OF_ENDOTHELIAL_BARRIER	GO_ESTABLISHMENT_OF_ENDOTHELIAL_BARRIER		46	0.415409	1.21824	0.246988	0.288639	1	4012	tags=41%, list=7%, signal=44%
GO_POSITIVE_REGULATION_OF_IMMUNOGLOBULIN_PRODUCTION	GO_POSITIVE_REGULATION_OF_IMMUNOGLOBULIN_PRODUCTION		45	0.402849	1.21766	0.229039	0.289073	1	7696	tags=40%, list=14%, signal=46%
GO_REGULATION_OF_CELL_JUNCTION_ASSEMBLY	GO_REGULATION_OF_CELL_JUNCTION_ASSEMBLY		200	0.326237	1.21729	0.19774	0.289208	1	5519	tags=29%, list=10%, signal=32%
GO_POSITIVE_REGULATION_OF_NUCLEAR_DIVISION	GO_POSITIVE_REGULATION_OF_NUCLEAR_DIVISION		71	0.339909	1.21692	0.196787	0.289394	1	6400	tags=38%, list=12%, signal=43%
GO_POSITIVE_REGULATION_OF_NERVOUS_SYSTEM_PROCESS	GO_POSITIVE_REGULATION_OF_NERVOUS_SYSTEM_PROCESS		65	0.353211	1.21661	0.182524	0.289511	1	2957	tags=29%, list=5%, signal=31%
GO_HEPATICOBILIARY_SYSTEM_DEVELOPMENT	GO_HEPATICOBILIARY_SYSTEM_DEVELOPMENT		144	0.315117	1.21633	0.163462	0.289544	1	2378	tags=19%, list=4%, signal=20%
GO_POSITIVE_REGULATION_OF_MITOTIC_SISTER_CHROMATID_SEGREGATION	GO_POSITIVE_REGULATION_OF_MITOTIC_SISTER_CHROMATID_SEGREGATION		22	0.457975	1.21625	0.288538	0.289341	1	6036	tags=50%, list=11%, signal=56%
GO_REGULATION_OF_CYCLIN_DEPENDENT_PROTEIN_KINASE_ACTIVITY	GO_REGULATION_OF_CYCLIN_DEPENDENT_PROTEIN_KINASE_ACTIVITY		104	0.335703	1.21443	0.192079	0.291164	1	4337	tags=29%, list=8%, signal=31%
GO_FIBROBLAST_GROWTH_FACTOR_RECEPTOR_SIGNALING_PATHWAY	GO_FIBROBLAST_GROWTH_FACTOR_RECEPTOR_SIGNALING_PATHWAY		115	0.339184	1.21341	0.213178	0.292136	1	4197	tags=22%, list=8%, signal=23%
GO_PRI_MIRNA_TRANSCRIPTION_BY_RNA_POLYMERASE_II	GO_PRI_MIRNA_TRANSCRIPTION_BY_RNA_POLYMERASE_II		53	0.37756	1.21312	0.251923	0.292158	1	6346	tags=47%, list=11%, signal=53%
GO_NEGATIVE_REGULATION_OF_CHROMOSOME_ORGANIZATION	GO_NEGATIVE_REGULATION_OF_CHROMOSOME_ORGANIZATION		147	0.360034	1.21244	0.270916	0.2927	1	6442	tags=33%, list=12%, signal=37%
GO_RESPONSE_TO_INTERLEUKIN_6	GO_RESPONSE_TO_INTERLEUKIN_6		54	0.375872	1.21232	0.245614	0.292563	1	7131	tags=37%, list=13%, signal=42%
GO_REGULATION_OF_CELL_CYCLE_ARREST	GO_REGULATION_OF_CELL_CYCLE_ARREST		105	0.331581	1.2122	0.219802	0.292432	1	5765	tags=32%, list=10%, signal=36%
GO_ANIMAL_ORGAN_MATURATION	GO_ANIMAL_ORGAN_MATURATION		26	0.403525	1.21139	0.220039	0.293112	1	3299	tags=27%, list=6%, signal=29%
GO_REGULATION_OF_PROTEIN_DEPOLYMERIZATION	GO_REGULATION_OF_PROTEIN_DEPOLYMERIZATION		88	0.348886	1.21096	0.212928	0.293364	1	4334	tags=28%, list=8%, signal=31%
GO_REGULATION_OF_OLIGODENDROCYTE_DIFFERENTIATION	GO_REGULATION_OF_OLIGODENDROCYTE_DIFFERENTIATION		40	0.383929	1.21092	0.207767	0.293118	1	6634	tags=43%, list=12%, signal=48%
GO_POSITIVE_REGULATION_OF_STEM_CELL_DIFFERENTIATION	GO_POSITIVE_REGULATION_OF_STEM_CELL_DIFFERENTIATION		21	0.434784	1.21092	0.245174	0.292828	1	5760	tags=33%, list=10%, signal=37%
GO_PHARYNGEAL_SYSTEM_DEVELOPMENT	GO_PHARYNGEAL_SYSTEM_DEVELOPMENT		26	0.409571	1.2109	0.194231	0.292563	1	2658	tags=23%, list=5%, signal=24%
GO_REGULATION_OF_B_CELL_ACTIVATION	GO_REGULATION_OF_B_CELL_ACTIVATION		184	0.429192	1.20911	0.296523	0.294349	1	8032	tags=48%, list=14%, signal=56%
GO_NEGATIVE_REGULATION_OF_LIPID_STORAGE	GO_NEGATIVE_REGULATION_OF_LIPID_STORAGE		21	0.435612	1.20898	0.235294	0.294207	1	4010	tags=29%, list=7%, signal=31%
GO_CELLULAR_RESPONSE_TO_LOW_DENSITY_LIPOPROTEIN_PARTICLE_STIMULUS	GO_CELLULAR_RESPONSE_TO_LOW_DENSITY_LIPOPROTEIN_PARTICLE_STIMULUS		21	0.428897	1.20865	0.204365	0.294299	1	4516	tags=33%, list=8%, signal=36%
GO_RESPONSE_TO_HYPEROXIA	GO_RESPONSE_TO_HYPEROXIA		22	0.390685	1.20865	0.198842	0.294016	1	4857	tags=36%, list=9%, signal=40%
GO_MODULATION_BY_SYMBIONT_OF_HOST_PROCESS	GO_MODULATION_BY_SYMBIONT_OF_HOST_PROCESS		38	0.391805	1.20834	0.219466	0.294115	1	5394	tags=34%, list=10%, signal=38%
GO_CELLULAR_RESPONSE_TO_ESTRADIOL_STIMULUS	GO_CELLULAR_RESPONSE_TO_ESTRADIOL_STIMULUS		38	0.362136	1.20816	0.187381	0.294041	1	5411	tags=37%, list=10%, signal=41%
GO_REGULATION_OF_CIRCADIAN_SLEEP_WAKE_CYCLE	GO_REGULATION_OF_CIRCADIAN_SLEEP_WAKE_CYCLE		22	0.420392	1.20808	0.212062	0.293858	1	3372	tags=23%, list=6%, signal=24%
GO_REGULATION_OF_NEURON_MIGRATION	GO_REGULATION_OF_NEURON_MIGRATION		45	0.387045	1.2077	0.234405	0.294046	1	2379	tags=24%, list=4%, signal=26%
GO_MYD88_INDEPENDENT_TOLL_LIKE_RECEPTOR_SIGNALING_PATHWAY	GO_MYD88_INDEPENDENT_TOLL_LIKE_RECEPTOR_SIGNALING_PATHWAY		34	0.428458	1.2074	0.27821	0.294159	1	5579	tags=47%, list=10%, signal=52%
GO_REGULATION_OF_IMMUNOGLOBULIN_PRODUCTION	GO_REGULATION_OF_IMMUNOGLOBULIN_PRODUCTION		68	0.382479	1.20739	0.236	0.293878	1	7696	tags=41%, list=14%, signal=48%
GO_POSITIVE_REGULATION_OF_MRNA_METABOLIC_PROCESS	GO_POSITIVE_REGULATION_OF_MRNA_METABOLIC_PROCESS		82	0.377011	1.20659	0.256972	0.294571	1	6215	tags=34%, list=11%, signal=38%
GO_POSITIVE_REGULATION_OF_TRANSLATION	GO_POSITIVE_REGULATION_OF_TRANSLATION		136	0.331983	1.20613	0.227642	0.29483	1	5159	tags=32%, list=9%, signal=35%
GO_NEUROMUSCULAR_PROCESS_CONTROLLING_BALANCE	GO_NEUROMUSCULAR_PROCESS_CONTROLLING_BALANCE		51	0.349019	1.20603	0.175758	0.294693	1	6617	tags=33%, list=12%, signal=38%
GO_PEROXISOME_PROLIFERATOR_ACTIVATED_RECEPTOR_SIGNALING_PATHWAY	GO_PEROXISOME_PROLIFERATOR_ACTIVATED_RECEPTOR_SIGNALING_PATHWAY		21	0.409683	1.20576	0.216797	0.294749	1	7131	tags=38%, list=13%, signal=44%
GO_G0_TO_G1_TRANSITION	GO_G0_TO_G1_TRANSITION		45	0.398019	1.20569	0.256809	0.294541	1	6609	tags=36%, list=12%, signal=40%
GO_CLATHRIN_DEPENDENT_ENDOCYTOSIS	GO_CLATHRIN_DEPENDENT_ENDOCYTOSIS		45	0.389421	1.20416	0.25098	0.296074	1	5125	tags=29%, list=9%, signal=32%
GO_REGULATION_OF_FIBROBLAST_MIGRATION	GO_REGULATION_OF_FIBROBLAST_MIGRATION		34	0.39658	1.20285	0.227533	0.29738	1	5360	tags=44%, list=10%, signal=49%
GO_ICOSANOID_METABOLIC_PROCESS	GO_ICOSANOID_METABOLIC_PROCESS		122	0.324597	1.20248	0.197581	0.297552	1	6607	tags=29%, list=12%, signal=32%
GO_NEGATIVE_REGULATION_OF_MAP_KINASE_ACTIVITY	GO_NEGATIVE_REGULATION_OF_MAP_KINASE_ACTIVITY		77	0.345373	1.20209	0.212724	0.297718	1	7176	tags=39%, list=13%, signal=45%
GO_RELEASE_OF_CYTOCHROME_C_FROM_MITOCHONDRIA	GO_RELEASE_OF_CYTOCHROME_C_FROM_MITOCHONDRIA		60	0.334643	1.20181	0.200772	0.297764	1	4951	tags=32%, list=9%, signal=35%
GO_GTP_METABOLIC_PROCESS	GO_GTP_METABOLIC_PROCESS		25	0.384418	1.20146	0.231827	0.297921	1	5574	tags=36%, list=10%, signal=40%
GO_POSITIVE_REGULATION_OF_TELOMERE_MAINTENANCE_VIA_TELOMERE_LENGTHENING	GO_POSITIVE_REGULATION_OF_TELOMERE_MAINTENANCE_VIA_TELOMERE_LENGTHENING		37	0.430295	1.20137	0.277328	0.297727	1	7414	tags=54%, list=13%, signal=62%
GO_REGULATION_OF_CHONDROCYTE_DIFFERENTIATION	GO_REGULATION_OF_CHONDROCYTE_DIFFERENTIATION		51	0.384472	1.20105	0.244742	0.297844	1	3299	tags=27%, list=6%, signal=29%
GO_ENDOTHELIAL_CELL_DEVELOPMENT	GO_ENDOTHELIAL_CELL_DEVELOPMENT		64	0.376197	1.20083	0.250973	0.297826	1	4012	tags=34%, list=7%, signal=37%
GO_NEGATIVE_REGULATION_OF_EMBRYONIC_DEVELOPMENT	GO_NEGATIVE_REGULATION_OF_EMBRYONIC_DEVELOPMENT		25	0.407837	1.20073	0.245509	0.297655	1	3894	tags=52%, list=7%, signal=56%
GO_MULTI_ORGANISM_LOCALIZATION	GO_MULTI_ORGANISM_LOCALIZATION		66	0.396613	1.2006	0.277132	0.297515	1	5896	tags=33%, list=11%, signal=37%
GO_IMPORT_INTO_NUCLEUS	GO_IMPORT_INTO_NUCLEUS		171	0.333731	1.20002	0.236538	0.297909	1	4431	tags=23%, list=8%, signal=25%
GO_CEREBRAL_CORTEX_DEVELOPMENT	GO_CEREBRAL_CORTEX_DEVELOPMENT		115	0.350609	1.19957	0.232742	0.298135	1	3813	tags=28%, list=7%, signal=30%
GO_STRESS_GRANULE_ASSEMBLY	GO_STRESS_GRANULE_ASSEMBLY		23	0.475565	1.19904	0.300797	0.298487	1	5897	tags=39%, list=11%, signal=44%
GO_REGULATION_OF_PHOSPHATIDYLINOSITOL_3_KINASE_SIGNALING	GO_REGULATION_OF_PHOSPHATIDYLINOSITOL_3_KINASE_SIGNALING		125	0.335302	1.19867	0.210728	0.298634	1	7006	tags=33%, list=13%, signal=37%
GO_REGULATION_OF_MITOCHONDRIAL_OUTER_MEMBRANE_PERMEABILIZATION_INVOLVED_IN_APOPTOTIC_SIGNALING_PATHWAY	GO_REGULATION_OF_MITOCHONDRIAL_OUTER_MEMBRANE_PERMEABILIZATION_INVOLVED_IN_APOPTOTIC_SIGNALING_PATHWAY		45	0.3502	1.19839	0.242202	0.298693	1	4950	tags=36%, list=9%, signal=39%
GO_REGULATION_OF_PROTEIN_TARGETING_TO_MEMBRANE	GO_REGULATION_OF_PROTEIN_TARGETING_TO_MEMBRANE		36	0.366582	1.1979	0.194215	0.298983	1	7542	tags=42%, list=14%, signal=48%
GO_POSITIVE_REGULATION_OF_PROTEOLYSIS_INVOLVED_IN_CELLULAR_PROTEIN_CATABOLIC_PROCESS	GO_POSITIVE_REGULATION_OF_PROTEOLYSIS_INVOLVED_IN_CELLULAR_PROTEIN_CATABOLIC_PROCESS		126	0.321339	1.19754	0.22619	0.29914	1	3677	tags=23%, list=7%, signal=25%
GO_MESODERMAL_CELL_DIFFERENTIATION	GO_MESODERMAL_CELL_DIFFERENTIATION		35	0.388948	1.19663	0.198444	0.299935	1	3834	tags=26%, list=7%, signal=28%
GO_MYOTUBE_DIFFERENTIATION	GO_MYOTUBE_DIFFERENTIATION		114	0.3463	1.19652	0.250485	0.299802	1	5828	tags=30%, list=11%, signal=33%
GO_ECTODERM_DEVELOPMENT	GO_ECTODERM_DEVELOPMENT		22	0.435763	1.19646	0.250965	0.29959	1	4490	tags=32%, list=8%, signal=35%
GO_OOGENESIS	GO_OOGENESIS		91	0.324663	1.19586	0.212237	0.299995	1	5024	tags=25%, list=9%, signal=28%
GO_CD4_POSITIVE_OR_CD8_POSITIVE_ALPHA_BETA_T_CELL_LINEAGE_COMMITMENT	GO_CD4_POSITIVE_OR_CD8_POSITIVE_ALPHA_BETA_T_CELL_LINEAGE_COMMITMENT		22	0.501326	1.19496	0.319192	0.300751	1	5763	tags=41%, list=10%, signal=46%
GO_NEGATIVE_REGULATION_OF_TRANSMEMBRANE_RECEPTOR_PROTEIN_SERINE_THREONINE_KINASE_SIGNALING_PATHWAY	GO_NEGATIVE_REGULATION_OF_TRANSMEMBRANE_RECEPTOR_PROTEIN_SERINE_THREONINE_KINASE_SIGNALING_PATHWAY		130	0.328409	1.19463	0.21374	0.300855	1	3978	tags=23%, list=7%, signal=25%
GO_DEVELOPMENT_OF_PRIMARY_FEMALE_SEXUAL_CHARACTERISTICS	GO_DEVELOPMENT_OF_PRIMARY_FEMALE_SEXUAL_CHARACTERISTICS		105	0.327584	1.19418	0.197674	0.301105	1	5551	tags=30%, list=10%, signal=34%
GO_REGULATION_OF_BIOMINERALIZATION	GO_REGULATION_OF_BIOMINERALIZATION		94	0.351582	1.19364	0.210938	0.301448	1	6825	tags=36%, list=12%, signal=41%
GO_REGULATION_OF_T_CELL_APOPTOTIC_PROCESS	GO_REGULATION_OF_T_CELL_APOPTOTIC_PROCESS		34	0.402534	1.19353	0.248485	0.301289	1	6229	tags=44%, list=11%, signal=50%
GO_NEGATIVE_REGULATION_OF_PROTEASOMAL_UBIQUITIN_DEPENDENT_PROTEIN_CATABOLIC_PROCESS	GO_NEGATIVE_REGULATION_OF_PROTEASOMAL_UBIQUITIN_DEPENDENT_PROTEIN_CATABOLIC_PROCESS		35	0.381188	1.19305	0.271047	0.301607	1	6684	tags=49%, list=12%, signal=55%
GO_REGULATION_OF_SUPEROXIDE_METABOLIC_PROCESS	GO_REGULATION_OF_SUPEROXIDE_METABOLIC_PROCESS		36	0.375381	1.19131	0.222868	0.303518	1	3884	tags=31%, list=7%, signal=33%
GO_REGULATION_OF_PLATELET_DERIVED_GROWTH_FACTOR_RECEPTOR_SIGNALING_PATHWAY	GO_REGULATION_OF_PLATELET_DERIVED_GROWTH_FACTOR_RECEPTOR_SIGNALING_PATHWAY		23	0.406154	1.19104	0.249509	0.303581	1	3654	tags=30%, list=7%, signal=33%
GO_CELLULAR_RESPONSE_TO_HEAT	GO_CELLULAR_RESPONSE_TO_HEAT		124	0.351141	1.19003	0.280075	0.304493	1	6844	tags=32%, list=12%, signal=37%
GO_PROTEIN_K48_LINKED_UBIQUITINATION	GO_PROTEIN_K48_LINKED_UBIQUITINATION		57	0.387111	1.18942	0.307393	0.304958	1	6303	tags=37%, list=11%, signal=42%
GO_MIDBRAIN_DEVELOPMENT	GO_MIDBRAIN_DEVELOPMENT		91	0.307503	1.18936	0.189139	0.304742	1	5160	tags=30%, list=9%, signal=33%
GO_SUBSTANTIA_NIGRA_DEVELOPMENT	GO_SUBSTANTIA_NIGRA_DEVELOPMENT		43	0.352093	1.18863	0.228407	0.305318	1	6293	tags=44%, list=11%, signal=50%
GO_INCLUSION_BODY_ASSEMBLY	GO_INCLUSION_BODY_ASSEMBLY		24	0.404322	1.18776	0.245648	0.306061	1	4207	tags=29%, list=8%, signal=32%
GO_REGULATION_OF_AXON_GUIDANCE	GO_REGULATION_OF_AXON_GUIDANCE		44	0.392003	1.18709	0.265267	0.306521	1	5308	tags=32%, list=10%, signal=35%
GO_B_CELL_RECEPTOR_SIGNALING_PATHWAY	GO_B_CELL_RECEPTOR_SIGNALING_PATHWAY		121	0.489598	1.18684	0.340816	0.306515	1	9878	tags=60%, list=18%, signal=73%
GO_DENDRITIC_CELL_MIGRATION	GO_DENDRITIC_CELL_MIGRATION		29	0.462899	1.18633	0.298246	0.306851	1	6190	tags=48%, list=11%, signal=54%
GO_REGULATION_OF_DNA_REPAIR	GO_REGULATION_OF_DNA_REPAIR		132	0.353562	1.18623	0.266667	0.306674	1	5839	tags=33%, list=11%, signal=37%
GO_VACUOLAR_TRANSPORT	GO_VACUOLAR_TRANSPORT		150	0.340734	1.18551	0.275449	0.307249	1	6087	tags=33%, list=11%, signal=37%
GO_MATURE_B_CELL_DIFFERENTIATION_INVOLVED_IN_IMMUNE_RESPONSE	GO_MATURE_B_CELL_DIFFERENTIATION_INVOLVED_IN_IMMUNE_RESPONSE		22	0.464088	1.18551	0.294	0.306965	1	3798	tags=36%, list=7%, signal=39%
GO_LABYRINTHINE_LAYER_DEVELOPMENT	GO_LABYRINTHINE_LAYER_DEVELOPMENT		49	0.350368	1.18518	0.240777	0.307097	1	4355	tags=24%, list=8%, signal=27%
GO_NEGATIVE_REGULATION_OF_LYMPHOCYTE_MEDIATED_IMMUNITY	GO_NEGATIVE_REGULATION_OF_LYMPHOCYTE_MEDIATED_IMMUNITY		42	0.443167	1.1848	0.292089	0.307277	1	7963	tags=57%, list=14%, signal=67%
GO_NUCLEOSIDE_MONOPHOSPHATE_METABOLIC_PROCESS	GO_NUCLEOSIDE_MONOPHOSPHATE_METABOLIC_PROCESS		72	0.331615	1.18392	0.253579	0.308054	1	4168	tags=28%, list=8%, signal=30%
GO_REGULATION_OF_VIRAL_INDUCED_CYTOPLASMIC_PATTERN_RECOGNITION_RECEPTOR_SIGNALING_PATHWAY	GO_REGULATION_OF_VIRAL_INDUCED_CYTOPLASMIC_PATTERN_RECOGNITION_RECEPTOR_SIGNALING_PATHWAY		22	0.408035	1.18355	0.259109	0.308176	1	4826	tags=32%, list=9%, signal=35%
GO_MODULATION_BY_VIRUS_OF_HOST_PROCESS	GO_MODULATION_BY_VIRUS_OF_HOST_PROCESS		29	0.396059	1.18327	0.259117	0.308255	1	5394	tags=38%, list=10%, signal=42%
GO_REGULATION_OF_SISTER_CHROMATID_SEGREGATION	GO_REGULATION_OF_SISTER_CHROMATID_SEGREGATION		84	0.374011	1.18292	0.307692	0.308427	1	6036	tags=38%, list=11%, signal=43%
GO_POSITIVE_REGULATION_OF_ANIMAL_ORGAN_MORPHOGENESIS	GO_POSITIVE_REGULATION_OF_ANIMAL_ORGAN_MORPHOGENESIS		85	0.344552	1.18284	0.226054	0.308232	1	4649	tags=29%, list=8%, signal=32%
GO_REGULATION_OF_LAMELLIPODIUM_ASSEMBLY	GO_REGULATION_OF_LAMELLIPODIUM_ASSEMBLY		37	0.375445	1.18246	0.261682	0.308386	1	5640	tags=35%, list=10%, signal=39%
GO_REGULATION_OF_STEM_CELL_DIFFERENTIATION	GO_REGULATION_OF_STEM_CELL_DIFFERENTIATION		117	0.328077	1.18237	0.238569	0.308225	1	6814	tags=32%, list=12%, signal=36%
GO_NEGATIVE_REGULATION_OF_CELL_JUNCTION_ASSEMBLY	GO_NEGATIVE_REGULATION_OF_CELL_JUNCTION_ASSEMBLY		32	0.39235	1.18114	0.266795	0.309454	1	6346	tags=47%, list=11%, signal=53%
GO_POSITIVE_REGULATION_OF_MICROTUBULE_POLYMERIZATION_OR_DEPOLYMERIZATION	GO_POSITIVE_REGULATION_OF_MICROTUBULE_POLYMERIZATION_OR_DEPOLYMERIZATION		34	0.383273	1.18015	0.250478	0.310362	1	3721	tags=24%, list=7%, signal=25%
GO_NEURON_PROJECTION_REGENERATION	GO_NEURON_PROJECTION_REGENERATION		59	0.350799	1.18012	0.237094	0.310119	1	2726	tags=20%, list=5%, signal=21%
GO_REGULATION_OF_BEHAVIOR	GO_REGULATION_OF_BEHAVIOR		70	0.325651	1.17938	0.194286	0.310772	1	6822	tags=27%, list=12%, signal=31%
GO_POSITIVE_REGULATION_OF_NITRIC_OXIDE_SYNTHASE_ACTIVITY	GO_POSITIVE_REGULATION_OF_NITRIC_OXIDE_SYNTHASE_ACTIVITY		22	0.416179	1.17927	0.276342	0.310609	1	1110	tags=23%, list=2%, signal=23%
GO_REGULATION_OF_BONE_DEVELOPMENT	GO_REGULATION_OF_BONE_DEVELOPMENT		25	0.392939	1.17915	0.25	0.310431	1	3398	tags=36%, list=6%, signal=38%
GO_NEGATIVE_REGULATION_OF_CELLULAR_PROTEIN_LOCALIZATION	GO_NEGATIVE_REGULATION_OF_CELLULAR_PROTEIN_LOCALIZATION		116	0.322358	1.17909	0.225	0.310207	1	5193	tags=33%, list=9%, signal=36%
GO_ESTABLISHMENT_OR_MAINTENANCE_OF_MONOPOLAR_CELL_POLARITY	GO_ESTABLISHMENT_OR_MAINTENANCE_OF_MONOPOLAR_CELL_POLARITY		22	0.386501	1.17882	0.253283	0.310266	1	5667	tags=41%, list=10%, signal=46%
GO_EMBRYONIC_CRANIAL_SKELETON_MORPHOGENESIS	GO_EMBRYONIC_CRANIAL_SKELETON_MORPHOGENESIS		48	0.382828	1.17822	0.259962	0.310752	1	6257	tags=35%, list=11%, signal=40%
GO_RESPONSE_TO_LEUKEMIA_INHIBITORY_FACTOR	GO_RESPONSE_TO_LEUKEMIA_INHIBITORY_FACTOR		97	0.349659	1.17785	0.264414	0.310945	1	6597	tags=34%, list=12%, signal=39%
GO_MYELOID_CELL_DEVELOPMENT	GO_MYELOID_CELL_DEVELOPMENT		72	0.344562	1.1777	0.248106	0.310841	1	4928	tags=28%, list=9%, signal=30%
GO_POSITIVE_REGULATION_OF_STRESS_FIBER_ASSEMBLY	GO_POSITIVE_REGULATION_OF_STRESS_FIBER_ASSEMBLY		52	0.362385	1.17675	0.252485	0.311782	1	6080	tags=37%, list=11%, signal=41%
GO_REGULATION_OF_VASCULAR_ENDOTHELIAL_GROWTH_FACTOR_RECEPTOR_SIGNALING_PATHWAY	GO_REGULATION_OF_VASCULAR_ENDOTHELIAL_GROWTH_FACTOR_RECEPTOR_SIGNALING_PATHWAY		33	0.367544	1.17516	0.244782	0.313431	1	2946	tags=27%, list=5%, signal=29%
GO_POSITIVE_REGULATION_OF_MUSCLE_CELL_APOPTOTIC_PROCESS	GO_POSITIVE_REGULATION_OF_MUSCLE_CELL_APOPTOTIC_PROCESS		32	0.370182	1.17453	0.248988	0.313949	1	5969	tags=25%, list=11%, signal=28%
GO_PURINERGIC_NUCLEOTIDE_RECEPTOR_SIGNALING_PATHWAY	GO_PURINERGIC_NUCLEOTIDE_RECEPTOR_SIGNALING_PATHWAY		32	0.426244	1.17385	0.290581	0.314491	1	8430	tags=53%, list=15%, signal=63%
GO_ATTACHMENT_OF_SPINDLE_MICROTUBULES_TO_KINETOCHORE	GO_ATTACHMENT_OF_SPINDLE_MICROTUBULES_TO_KINETOCHORE		34	0.433632	1.1733	0.341365	0.314862	1	5940	tags=59%, list=11%, signal=66%
GO_EPOXYGENASE_P450_PATHWAY	GO_EPOXYGENASE_P450_PATHWAY		20	0.45494	1.17272	0.278008	0.315281	1	366	tags=10%, list=1%, signal=10%
GO_COLLATERAL_SPROUTING	GO_COLLATERAL_SPROUTING		27	0.383182	1.17247	0.256619	0.315333	1	7970	tags=41%, list=14%, signal=48%
GO_CARBOHYDRATE_DERIVATIVE_CATABOLIC_PROCESS	GO_CARBOHYDRATE_DERIVATIVE_CATABOLIC_PROCESS		194	0.289615	1.1724	0.206628	0.31513	1	4084	tags=23%, list=7%, signal=25%
GO_ESTABLISHMENT_OF_MITOTIC_SPINDLE_LOCALIZATION	GO_ESTABLISHMENT_OF_MITOTIC_SPINDLE_LOCALIZATION		35	0.427399	1.17109	0.304082	0.316552	1	8398	tags=51%, list=15%, signal=61%
GO_SPINDLE_ASSEMBLY	GO_SPINDLE_ASSEMBLY		115	0.361771	1.17107	0.306773	0.316286	1	5849	tags=33%, list=11%, signal=37%
GO_VESICLE_MEDIATED_TRANSPORT_TO_THE_PLASMA_MEMBRANE	GO_VESICLE_MEDIATED_TRANSPORT_TO_THE_PLASMA_MEMBRANE		94	0.355103	1.17057	0.268924	0.316566	1	6413	tags=35%, list=12%, signal=40%
GO_NEGATIVE_REGULATION_OF_CELLULAR_RESPONSE_TO_VASCULAR_ENDOTHELIAL_GROWTH_FACTOR_STIMULUS	GO_NEGATIVE_REGULATION_OF_CELLULAR_RESPONSE_TO_VASCULAR_ENDOTHELIAL_GROWTH_FACTOR_STIMULUS		20	0.422686	1.16966	0.289062	0.317349	1	4823	tags=25%, list=9%, signal=27%
GO_NEGATIVE_REGULATION_OF_DEPHOSPHORYLATION	GO_NEGATIVE_REGULATION_OF_DEPHOSPHORYLATION		110	0.318541	1.1696	0.243615	0.317155	1	4497	tags=25%, list=8%, signal=28%
GO_REGULATION_OF_PRESYNAPSE_ORGANIZATION	GO_REGULATION_OF_PRESYNAPSE_ORGANIZATION		36	0.373181	1.16937	0.248077	0.317145	1	5311	tags=25%, list=10%, signal=28%
GO_G2_DNA_DAMAGE_CHECKPOINT	GO_G2_DNA_DAMAGE_CHECKPOINT		35	0.393544	1.1687	0.279592	0.317672	1	6932	tags=40%, list=12%, signal=46%
GO_BIOMINERALIZATION	GO_BIOMINERALIZATION		162	0.326382	1.16852	0.227184	0.317626	1	4401	tags=27%, list=8%, signal=29%
GO_NEGATIVE_REGULATION_OF_HEMOPOIESIS	GO_NEGATIVE_REGULATION_OF_HEMOPOIESIS		157	0.313496	1.16813	0.246602	0.317814	1	4431	tags=25%, list=8%, signal=27%
GO_REGULATION_OF_PHOSPHOLIPASE_ACTIVITY	GO_REGULATION_OF_PHOSPHOLIPASE_ACTIVITY		73	0.345978	1.16758	0.22807	0.318222	1	5912	tags=34%, list=11%, signal=38%
GO_LIPOPOLYSACCHARIDE_MEDIATED_SIGNALING_PATHWAY	GO_LIPOPOLYSACCHARIDE_MEDIATED_SIGNALING_PATHWAY		59	0.390178	1.16717	0.308989	0.318444	1	6346	tags=39%, list=11%, signal=44%
GO_POSITIVE_REGULATION_OF_SIGNALING_RECEPTOR_ACTIVITY	GO_POSITIVE_REGULATION_OF_SIGNALING_RECEPTOR_ACTIVITY		37	0.380348	1.16712	0.264151	0.318233	1	7174	tags=41%, list=13%, signal=47%
GO_UNSATURATED_FATTY_ACID_METABOLIC_PROCESS	GO_UNSATURATED_FATTY_ACID_METABOLIC_PROCESS		118	0.308766	1.16705	0.225681	0.318017	1	5211	tags=25%, list=9%, signal=27%
GO_NEGATIVE_REGULATION_OF_DNA_BINDING_TRANSCRIPTION_FACTOR_ACTIVITY	GO_NEGATIVE_REGULATION_OF_DNA_BINDING_TRANSCRIPTION_FACTOR_ACTIVITY		178	0.294979	1.16703	0.231388	0.317748	1	4880	tags=26%, list=9%, signal=28%
GO_ADULT_LOCOMOTORY_BEHAVIOR	GO_ADULT_LOCOMOTORY_BEHAVIOR		75	0.320381	1.16694	0.187856	0.317593	1	3372	tags=24%, list=6%, signal=26%
GO_POSITIVE_REGULATION_OF_CELL_GROWTH	GO_POSITIVE_REGULATION_OF_CELL_GROWTH		168	0.303508	1.16583	0.246654	0.318704	1	5167	tags=25%, list=9%, signal=27%
GO_PHAGOCYTOSIS_RECOGNITION	GO_PHAGOCYTOSIS_RECOGNITION		77	0.507162	1.16569	0.372233	0.318574	1	10613	tags=71%, list=19%, signal=88%
GO_REGULATION_OF_PROTEASOMAL_UBIQUITIN_DEPENDENT_PROTEIN_CATABOLIC_PROCESS	GO_REGULATION_OF_PROTEASOMAL_UBIQUITIN_DEPENDENT_PROTEIN_CATABOLIC_PROCESS		130	0.325053	1.16563	0.274949	0.318353	1	6684	tags=33%, list=12%, signal=38%
GO_RNA_STABILIZATION	GO_RNA_STABILIZATION		58	0.375309	1.16517	0.279208	0.318606	1	7231	tags=31%, list=13%, signal=36%
GO_NEGATIVE_REGULATION_OF_B_CELL_ACTIVATION	GO_NEGATIVE_REGULATION_OF_B_CELL_ACTIVATION		32	0.427365	1.16486	0.320641	0.318699	1	6205	tags=53%, list=11%, signal=60%
GO_POSITIVE_REGULATION_OF_CELL_JUNCTION_ASSEMBLY	GO_POSITIVE_REGULATION_OF_CELL_JUNCTION_ASSEMBLY		103	0.313135	1.16466	0.218284	0.318661	1	3812	tags=23%, list=7%, signal=25%
GO_PLATELET_MORPHOGENESIS	GO_PLATELET_MORPHOGENESIS		22	0.404898	1.16419	0.268482	0.318973	1	4347	tags=45%, list=8%, signal=49%
GO_POSITIVE_CHEMOTAXIS	GO_POSITIVE_CHEMOTAXIS		67	0.333671	1.16401	0.252372	0.318888	1	6100	tags=30%, list=11%, signal=33%
GO_REGULATION_OF_SYNAPTIC_PLASTICITY	GO_REGULATION_OF_SYNAPTIC_PLASTICITY		191	0.29855	1.16319	0.19305	0.319687	1	6569	tags=32%, list=12%, signal=37%
GO_PROSTATE_GLAND_DEVELOPMENT	GO_PROSTATE_GLAND_DEVELOPMENT		49	0.366666	1.16318	0.246241	0.319419	1	3894	tags=29%, list=7%, signal=31%
GO_REGULATION_OF_HETEROTYPIC_CELL_CELL_ADHESION	GO_REGULATION_OF_HETEROTYPIC_CELL_CELL_ADHESION		26	0.398811	1.16283	0.242485	0.319581	1	12168	tags=65%, list=22%, signal=84%
GO_HISTONE_MRNA_METABOLIC_PROCESS	GO_HISTONE_MRNA_METABOLIC_PROCESS		25	0.428762	1.16278	0.319277	0.319359	1	4153	tags=32%, list=7%, signal=35%
GO_INTESTINAL_EPITHELIAL_CELL_DIFFERENTIATION	GO_INTESTINAL_EPITHELIAL_CELL_DIFFERENTIATION		23	0.442191	1.16238	0.270707	0.319546	1	7524	tags=52%, list=14%, signal=60%
GO_REGULATION_OF_TRANSCRIPTION_REGULATORY_REGION_DNA_BINDING	GO_REGULATION_OF_TRANSCRIPTION_REGULATORY_REGION_DNA_BINDING		52	0.330252	1.16183	0.235867	0.319886	1	4764	tags=25%, list=9%, signal=27%
GO_PROTEIN_LOCALIZATION_TO_CHROMATIN	GO_PROTEIN_LOCALIZATION_TO_CHROMATIN		28	0.419337	1.16145	0.314741	0.320092	1	4008	tags=29%, list=7%, signal=31%
GO_POSITIVE_REGULATION_OF_CELL_CYCLE_G2_M_PHASE_TRANSITION	GO_POSITIVE_REGULATION_OF_CELL_CYCLE_G2_M_PHASE_TRANSITION		30	0.391622	1.15979	0.276342	0.321816	1	2981	tags=23%, list=5%, signal=25%
GO_SOMATIC_RECOMBINATION_OF_IMMUNOGLOBULIN_GENE_SEGMENTS	GO_SOMATIC_RECOMBINATION_OF_IMMUNOGLOBULIN_GENE_SEGMENTS		56	0.372918	1.15948	0.283809	0.321908	1	8497	tags=48%, list=15%, signal=57%
GO_CHEMICAL_SYNAPTIC_TRANSMISSION_POSTSYNAPTIC	GO_CHEMICAL_SYNAPTIC_TRANSMISSION_POSTSYNAPTIC		112	0.314005	1.15942	0.228175	0.321702	1	4323	tags=27%, list=8%, signal=29%
GO_ANTIMICROBIAL_HUMORAL_IMMUNE_RESPONSE_MEDIATED_BY_ANTIMICROBIAL_PEPTIDE	GO_ANTIMICROBIAL_HUMORAL_IMMUNE_RESPONSE_MEDIATED_BY_ANTIMICROBIAL_PEPTIDE		75	0.367005	1.15934	0.240157	0.321517	1	10448	tags=44%, list=19%, signal=54%
GO_AXO_DENDRITIC_TRANSPORT	GO_AXO_DENDRITIC_TRANSPORT		70	0.350805	1.15899	0.276471	0.32166	1	5191	tags=36%, list=9%, signal=39%
GO_REGULATION_OF_POSTSYNAPTIC_MEMBRANE_NEUROTRANSMITTER_RECEPTOR_LEVELS	GO_REGULATION_OF_POSTSYNAPTIC_MEMBRANE_NEUROTRANSMITTER_RECEPTOR_LEVELS		68	0.337655	1.15858	0.244231	0.321882	1	6371	tags=32%, list=11%, signal=37%
GO_AXONAL_TRANSPORT	GO_AXONAL_TRANSPORT		59	0.352585	1.15796	0.281188	0.322425	1	5191	tags=37%, list=9%, signal=41%
GO_MATURE_B_CELL_DIFFERENTIATION	GO_MATURE_B_CELL_DIFFERENTIATION		28	0.46123	1.15709	0.332673	0.32327	1	5755	tags=43%, list=10%, signal=48%
GO_IMMUNOGLOBULIN_PRODUCTION_INVOLVED_IN_IMMUNOGLOBULIN_MEDIATED_IMMUNE_RESPONSE	GO_IMMUNOGLOBULIN_PRODUCTION_INVOLVED_IN_IMMUNOGLOBULIN_MEDIATED_IMMUNE_RESPONSE		61	0.37628	1.15701	0.319923	0.323077	1	8497	tags=48%, list=15%, signal=56%
GO_FC_EPSILON_RECEPTOR_SIGNALING_PATHWAY	GO_FC_EPSILON_RECEPTOR_SIGNALING_PATHWAY		168	0.390819	1.15699	0.329341	0.322814	1	8756	tags=46%, list=16%, signal=54%
GO_REGULATION_OF_NUCLEAR_DIVISION	GO_REGULATION_OF_NUCLEAR_DIVISION		188	0.310505	1.15684	0.273438	0.322734	1	6932	tags=37%, list=12%, signal=42%
GO_NEGATIVE_REGULATION_OF_PEPTIDYL_TYROSINE_PHOSPHORYLATION	GO_NEGATIVE_REGULATION_OF_PEPTIDYL_TYROSINE_PHOSPHORYLATION		55	0.338808	1.15676	0.253465	0.322548	1	4823	tags=29%, list=9%, signal=32%
GO_REGULATION_OF_METANEPHROS_DEVELOPMENT	GO_REGULATION_OF_METANEPHROS_DEVELOPMENT		23	0.40382	1.15662	0.281633	0.322425	1	8094	tags=57%, list=15%, signal=66%
GO_AUTOPHAGOSOME_MATURATION	GO_AUTOPHAGOSOME_MATURATION		40	0.378332	1.15618	0.303644	0.32266	1	5721	tags=40%, list=10%, signal=45%
GO_ANTIGEN_PROCESSING_AND_PRESENTATION_OF_PEPTIDE_ANTIGEN_VIA_MHC_CLASS_I	GO_ANTIGEN_PROCESSING_AND_PRESENTATION_OF_PEPTIDE_ANTIGEN_VIA_MHC_CLASS_I		99	0.382214	1.15601	0.293413	0.322587	1	6154	tags=35%, list=11%, signal=40%
GO_POSITIVE_REGULATION_OF_SMOOTH_MUSCLE_CELL_PROLIFERATION	GO_POSITIVE_REGULATION_OF_SMOOTH_MUSCLE_CELL_PROLIFERATION		99	0.324668	1.15539	0.270677	0.323084	1	8512	tags=41%, list=15%, signal=49%
GO_DENDRITE_MORPHOGENESIS	GO_DENDRITE_MORPHOGENESIS		146	0.335505	1.15534	0.28327	0.322868	1	3871	tags=27%, list=7%, signal=29%
GO_POSITIVE_REGULATION_OF_B_CELL_ACTIVATION	GO_POSITIVE_REGULATION_OF_B_CELL_ACTIVATION		140	0.429239	1.15475	0.337474	0.323367	1	9878	tags=55%, list=18%, signal=67%
GO_CYTOPLASMIC_TRANSLATIONAL_INITIATION	GO_CYTOPLASMIC_TRANSLATIONAL_INITIATION		35	0.424676	1.15351	0.315041	0.324567	1	7460	tags=49%, list=13%, signal=56%
GO_GLIAL_CELL_DEVELOPMENT	GO_GLIAL_CELL_DEVELOPMENT		121	0.295434	1.15344	0.230315	0.324384	1	4798	tags=25%, list=9%, signal=27%
GO_POSITIVE_REGULATION_OF_VASCULAR_ASSOCIATED_SMOOTH_MUSCLE_CELL_MIGRATION	GO_POSITIVE_REGULATION_OF_VASCULAR_ASSOCIATED_SMOOTH_MUSCLE_CELL_MIGRATION		22	0.412284	1.15235	0.284872	0.325461	1	2957	tags=27%, list=5%, signal=29%
GO_NOTCH_SIGNALING_PATHWAY	GO_NOTCH_SIGNALING_PATHWAY		193	0.29577	1.15233	0.226168	0.325191	1	4805	tags=25%, list=9%, signal=28%
GO_NEGATIVE_REGULATION_OF_INTERLEUKIN_2_PRODUCTION	GO_NEGATIVE_REGULATION_OF_INTERLEUKIN_2_PRODUCTION		23	0.398486	1.15225	0.286267	0.325012	1	3506	tags=26%, list=6%, signal=28%
GO_RESPONSE_TO_CAMP	GO_RESPONSE_TO_CAMP		94	0.316133	1.15187	0.23622	0.325189	1	3433	tags=24%, list=6%, signal=26%
GO_VESICLE_TRANSPORT_ALONG_MICROTUBULE	GO_VESICLE_TRANSPORT_ALONG_MICROTUBULE		49	0.370596	1.1514	0.283433	0.325506	1	5150	tags=41%, list=9%, signal=45%
GO_NEGATIVE_REGULATION_OF_DNA_BINDING	GO_NEGATIVE_REGULATION_OF_DNA_BINDING		53	0.335429	1.15122	0.266533	0.325438	1	7942	tags=36%, list=14%, signal=42%
GO_HISTONE_H2A_UBIQUITINATION	GO_HISTONE_H2A_UBIQUITINATION		26	0.417795	1.15111	0.335271	0.325298	1	5868	tags=31%, list=11%, signal=34%
GO_TRANSLATIONAL_INITIATION	GO_TRANSLATIONAL_INITIATION		192	0.390784	1.15029	0.342495	0.326081	1	6887	tags=45%, list=12%, signal=51%
GO_NEGATIVE_REGULATION_OF_DNA_METABOLIC_PROCESS	GO_NEGATIVE_REGULATION_OF_DNA_METABOLIC_PROCESS		125	0.323003	1.14982	0.292969	0.326375	1	5982	tags=32%, list=11%, signal=36%
GO_POSITIVE_REGULATION_OF_PEPTIDE_HORMONE_SECRETION	GO_POSITIVE_REGULATION_OF_PEPTIDE_HORMONE_SECRETION		99	0.303686	1.14925	0.229602	0.326732	1	4772	tags=25%, list=9%, signal=28%
GO_POSITIVE_REGULATION_OF_MACROAUTOPHAGY	GO_POSITIVE_REGULATION_OF_MACROAUTOPHAGY		68	0.369486	1.14905	0.308429	0.326701	1	5225	tags=29%, list=9%, signal=32%
GO_CIRCADIAN_REGULATION_OF_GENE_EXPRESSION	GO_CIRCADIAN_REGULATION_OF_GENE_EXPRESSION		66	0.350093	1.14896	0.273085	0.326529	1	4745	tags=30%, list=9%, signal=33%
GO_CELL_CELL_RECOGNITION	GO_CELL_CELL_RECOGNITION		80	0.310066	1.14788	0.232179	0.327592	1	7555	tags=33%, list=14%, signal=38%
GO_METAPHASE_PLATE_CONGRESSION	GO_METAPHASE_PLATE_CONGRESSION		60	0.373827	1.14772	0.321721	0.327493	1	6306	tags=42%, list=11%, signal=47%
GO_REGULATION_OF_CARDIAC_MUSCLE_CELL_ACTION_POTENTIAL	GO_REGULATION_OF_CARDIAC_MUSCLE_CELL_ACTION_POTENTIAL		31	0.387345	1.14761	0.284254	0.327341	1	3251	tags=29%, list=6%, signal=31%
GO_T_CELL_HOMEOSTASIS	GO_T_CELL_HOMEOSTASIS		38	0.392349	1.14747	0.309021	0.327221	1	4497	tags=39%, list=8%, signal=43%
GO_POSITIVE_REGULATION_OF_AUTOPHAGY	GO_POSITIVE_REGULATION_OF_AUTOPHAGY		131	0.342734	1.14741	0.296443	0.32699	1	6774	tags=34%, list=12%, signal=38%
GO_POSTREPLICATION_REPAIR	GO_POSTREPLICATION_REPAIR		52	0.367715	1.14707	0.306931	0.327125	1	4286	tags=29%, list=8%, signal=31%
GO_RESPONSE_TO_INCREASED_OXYGEN_LEVELS	GO_RESPONSE_TO_INCREASED_OXYGEN_LEVELS		29	0.344174	1.14678	0.265748	0.327167	1	4857	tags=34%, list=9%, signal=38%
GO_LENS_DEVELOPMENT_IN_CAMERA_TYPE_EYE	GO_LENS_DEVELOPMENT_IN_CAMERA_TYPE_EYE		83	0.324961	1.1463	0.261538	0.327489	1	7018	tags=35%, list=13%, signal=40%
GO_REGULATION_OF_PROTEIN_TARGETING	GO_REGULATION_OF_PROTEIN_TARGETING		82	0.309703	1.14629	0.255319	0.327225	1	3781	tags=23%, list=7%, signal=25%
GO_POSITIVE_REGULATION_OF_PROTEIN_TARGETING_TO_MITOCHONDRION	GO_POSITIVE_REGULATION_OF_PROTEIN_TARGETING_TO_MITOCHONDRION		32	0.361143	1.14605	0.312741	0.327254	1	2860	tags=22%, list=5%, signal=23%
GO_INTERLEUKIN_6_MEDIATED_SIGNALING_PATHWAY	GO_INTERLEUKIN_6_MEDIATED_SIGNALING_PATHWAY		33	0.423619	1.146	0.332673	0.327042	1	6744	tags=33%, list=12%, signal=38%
GO_POSITIVE_REGULATION_OF_CARDIAC_MUSCLE_TISSUE_DEVELOPMENT	GO_POSITIVE_REGULATION_OF_CARDIAC_MUSCLE_TISSUE_DEVELOPMENT		58	0.332031	1.14536	0.278505	0.327557	1	5389	tags=26%, list=10%, signal=29%
GO_VASCULOGENESIS	GO_VASCULOGENESIS		82	0.345268	1.14521	0.289628	0.327455	1	3433	tags=29%, list=6%, signal=31%
GO_POSITIVE_REGULATION_OF_B_CELL_PROLIFERATION	GO_POSITIVE_REGULATION_OF_B_CELL_PROLIFERATION		41	0.395584	1.14446	0.330784	0.328143	1	7696	tags=39%, list=14%, signal=45%
GO_POSITIVE_REGULATION_OF_CELL_MORPHOGENESIS_INVOLVED_IN_DIFFERENTIATION	GO_POSITIVE_REGULATION_OF_CELL_MORPHOGENESIS_INVOLVED_IN_DIFFERENTIATION		157	0.311966	1.14302	0.274472	0.32967	1	6706	tags=36%, list=12%, signal=40%
GO_DOPAMINERGIC_NEURON_DIFFERENTIATION	GO_DOPAMINERGIC_NEURON_DIFFERENTIATION		37	0.348437	1.1423	0.249505	0.330287	1	4548	tags=35%, list=8%, signal=38%
GO_REGULATION_OF_CARTILAGE_DEVELOPMENT	GO_REGULATION_OF_CARTILAGE_DEVELOPMENT		70	0.351403	1.14154	0.295455	0.330939	1	3894	tags=27%, list=7%, signal=29%
GO_PLASMA_LIPOPROTEIN_PARTICLE_CLEARANCE	GO_PLASMA_LIPOPROTEIN_PARTICLE_CLEARANCE		64	0.316635	1.14106	0.243952	0.331238	1	6058	tags=33%, list=11%, signal=37%
GO_REGULATION_OF_BONE_MINERALIZATION	GO_REGULATION_OF_BONE_MINERALIZATION		76	0.340162	1.14063	0.257198	0.331537	1	3978	tags=26%, list=7%, signal=28%
GO_ANOIKIS	GO_ANOIKIS		34	0.353962	1.14015	0.3125	0.331851	1	3219	tags=26%, list=6%, signal=28%
GO_PEPTIDYL_THREONINE_DEPHOSPHORYLATION	GO_PEPTIDYL_THREONINE_DEPHOSPHORYLATION		22	0.423611	1.13877	0.311787	0.33322	1	7023	tags=36%, list=13%, signal=42%
GO_REGULATION_OF_INFLAMMATORY_RESPONSE_TO_ANTIGENIC_STIMULUS	GO_REGULATION_OF_INFLAMMATORY_RESPONSE_TO_ANTIGENIC_STIMULUS		29	0.475891	1.13874	0.375254	0.332985	1	8955	tags=59%, list=16%, signal=70%
GO_POSITIVE_REGULATION_OF_OXIDOREDUCTASE_ACTIVITY	GO_POSITIVE_REGULATION_OF_OXIDOREDUCTASE_ACTIVITY		55	0.319156	1.13786	0.265504	0.333778	1	3073	tags=22%, list=6%, signal=23%
GO_BONE_MINERALIZATION	GO_BONE_MINERALIZATION		116	0.326035	1.13771	0.275665	0.333685	1	4246	tags=28%, list=8%, signal=30%
GO_REGULATION_OF_MAST_CELL_ACTIVATION_INVOLVED_IN_IMMUNE_RESPONSE	GO_REGULATION_OF_MAST_CELL_ACTIVATION_INVOLVED_IN_IMMUNE_RESPONSE		33	0.379343	1.1363	0.303279	0.335221	1	6058	tags=42%, list=11%, signal=48%
GO_EPITHELIAL_CELL_APOPTOTIC_PROCESS	GO_EPITHELIAL_CELL_APOPTOTIC_PROCESS		114	0.306811	1.13512	0.252918	0.336405	1	6346	tags=27%, list=11%, signal=31%
GO_AMINO_ACID_IMPORT	GO_AMINO_ACID_IMPORT		45	0.3426	1.1347	0.291498	0.336606	1	5137	tags=29%, list=9%, signal=32%
GO_CELLULAR_PROTEIN_CONTAINING_COMPLEX_LOCALIZATION	GO_CELLULAR_PROTEIN_CONTAINING_COMPLEX_LOCALIZATION		25	0.416698	1.13267	0.331984	0.338879	1	8763	tags=48%, list=16%, signal=57%
GO_REGULATION_OF_CELL_SUBSTRATE_JUNCTION_ORGANIZATION	GO_REGULATION_OF_CELL_SUBSTRATE_JUNCTION_ORGANIZATION		66	0.356412	1.13241	0.329457	0.338875	1	5764	tags=41%, list=10%, signal=46%
GO_PHENOL_CONTAINING_COMPOUND_BIOSYNTHETIC_PROCESS	GO_PHENOL_CONTAINING_COMPOUND_BIOSYNTHETIC_PROCESS		45	0.331914	1.13239	0.25	0.338612	1	3894	tags=24%, list=7%, signal=26%
GO_PROTEIN_LOCALIZATION_TO_POSTSYNAPSE	GO_PROTEIN_LOCALIZATION_TO_POSTSYNAPSE		48	0.327422	1.13204	0.285171	0.338783	1	3990	tags=27%, list=7%, signal=29%
GO_REGULATION_OF_SIGNAL_TRANSDUCTION_BY_P53_CLASS_MEDIATOR	GO_REGULATION_OF_SIGNAL_TRANSDUCTION_BY_P53_CLASS_MEDIATOR		179	0.319723	1.13189	0.306796	0.338689	1	5550	tags=30%, list=10%, signal=33%
GO_MEMBRANE_DOCKING	GO_MEMBRANE_DOCKING		180	0.311558	1.1316	0.298	0.338756	1	4744	tags=27%, list=9%, signal=30%
GO_HISTONE_H3_ACETYLATION	GO_HISTONE_H3_ACETYLATION		60	0.362719	1.13137	0.336653	0.338755	1	5982	tags=37%, list=11%, signal=41%
GO_SPLEEN_DEVELOPMENT	GO_SPLEEN_DEVELOPMENT		34	0.3694	1.13103	0.2846	0.338869	1	6103	tags=35%, list=11%, signal=40%
GO_RESPONSE_TO_HEAT	GO_RESPONSE_TO_HEAT		165	0.309203	1.13089	0.30916	0.338754	1	6588	tags=29%, list=12%, signal=33%
GO_REGULATION_OF_CYTOPLASMIC_TRANSPORT	GO_REGULATION_OF_CYTOPLASMIC_TRANSPORT		26	0.416487	1.13054	0.332024	0.338943	1	3757	tags=27%, list=7%, signal=29%
GO_POSITIVE_REGULATION_OF_KERATINOCYTE_DIFFERENTIATION	GO_POSITIVE_REGULATION_OF_KERATINOCYTE_DIFFERENTIATION		20	0.377675	1.13036	0.283237	0.338906	1	4144	tags=35%, list=7%, signal=38%
GO_NEGATIVE_REGULATION_OF_PEPTIDE_SECRETION	GO_NEGATIVE_REGULATION_OF_PEPTIDE_SECRETION		113	0.283812	1.13025	0.255859	0.338743	1	6177	tags=29%, list=11%, signal=33%
GO_MUSCLE_CELL_CELLULAR_HOMEOSTASIS	GO_MUSCLE_CELL_CELLULAR_HOMEOSTASIS		21	0.37431	1.12993	0.266925	0.338898	1	2916	tags=29%, list=5%, signal=30%
GO_RESPONSE_TO_ESTRADIOL	GO_RESPONSE_TO_ESTRADIOL		141	0.291063	1.12945	0.277344	0.339256	1	6607	tags=32%, list=12%, signal=36%
GO_METANEPHROS_MORPHOGENESIS	GO_METANEPHROS_MORPHOGENESIS		33	0.358787	1.12926	0.287402	0.339217	1	4125	tags=30%, list=7%, signal=33%
GO_ACTIN_FILAMENT_BASED_MOVEMENT	GO_ACTIN_FILAMENT_BASED_MOVEMENT		150	0.341781	1.12906	0.3286	0.339209	1	3290	tags=24%, list=6%, signal=25%
GO_POSITIVE_REGULATION_OF_TRANSCRIPTION_FROM_RNA_POLYMERASE_II_PROMOTER_IN_RESPONSE_TO_STRESS	GO_POSITIVE_REGULATION_OF_TRANSCRIPTION_FROM_RNA_POLYMERASE_II_PROMOTER_IN_RESPONSE_TO_STRESS		24	0.374846	1.12901	0.296	0.338985	1	6425	tags=46%, list=12%, signal=52%
GO_PHAGOSOME_MATURATION	GO_PHAGOSOME_MATURATION		48	0.339407	1.12894	0.296523	0.338779	1	5866	tags=33%, list=11%, signal=37%
GO_REGULATION_OF_CALCINEURIN_MEDIATED_SIGNALING	GO_REGULATION_OF_CALCINEURIN_MEDIATED_SIGNALING		36	0.350333	1.12876	0.278586	0.338744	1	2543	tags=17%, list=5%, signal=17%
GO_NEGATIVE_REGULATION_OF_CYSTEINE_TYPE_ENDOPEPTIDASE_ACTIVITY	GO_NEGATIVE_REGULATION_OF_CYSTEINE_TYPE_ENDOPEPTIDASE_ACTIVITY		91	0.307887	1.12842	0.266284	0.338877	1	5167	tags=31%, list=9%, signal=34%
GO_REGULATION_OF_POSTSYNAPTIC_MEMBRANE_POTENTIAL	GO_REGULATION_OF_POSTSYNAPTIC_MEMBRANE_POTENTIAL		144	0.302042	1.12836	0.243856	0.338665	1	4323	tags=25%, list=8%, signal=27%
GO_REGULATION_OF_NON_CANONICAL_WNT_SIGNALING_PATHWAY	GO_REGULATION_OF_NON_CANONICAL_WNT_SIGNALING_PATHWAY		23	0.394129	1.12795	0.304854	0.3389	1	4880	tags=35%, list=9%, signal=38%
GO_COLUMNAR_CUBOIDAL_EPITHELIAL_CELL_DEVELOPMENT	GO_COLUMNAR_CUBOIDAL_EPITHELIAL_CELL_DEVELOPMENT		62	0.319645	1.12735	0.29291	0.339338	1	6994	tags=39%, list=13%, signal=44%
GO_NEGATIVE_REGULATION_OF_INTRINSIC_APOPTOTIC_SIGNALING_PATHWAY_BY_P53_CLASS_MEDIATOR	GO_NEGATIVE_REGULATION_OF_INTRINSIC_APOPTOTIC_SIGNALING_PATHWAY_BY_P53_CLASS_MEDIATOR		22	0.371808	1.12703	0.300752	0.339446	1	4837	tags=32%, list=9%, signal=35%
GO_NEUROTRANSMITTER_RECEPTOR_TRANSPORT	GO_NEUROTRANSMITTER_RECEPTOR_TRANSPORT		48	0.339496	1.1268	0.2846	0.339427	1	6371	tags=35%, list=11%, signal=40%
GO_REGULATION_OF_MUSCLE_ADAPTATION	GO_REGULATION_OF_MUSCLE_ADAPTATION		92	0.325443	1.12562	0.283465	0.340671	1	4483	tags=23%, list=8%, signal=25%
GO_REGULATION_OF_COLLAGEN_METABOLIC_PROCESS	GO_REGULATION_OF_COLLAGEN_METABOLIC_PROCESS		44	0.348039	1.12551	0.292969	0.340539	1	5386	tags=36%, list=10%, signal=40%
GO_ESTABLISHMENT_OF_PROTEIN_LOCALIZATION_TO_MITOCHONDRIAL_MEMBRANE	GO_ESTABLISHMENT_OF_PROTEIN_LOCALIZATION_TO_MITOCHONDRIAL_MEMBRANE		49	0.337356	1.12447	0.308594	0.341557	1	4950	tags=31%, list=9%, signal=34%
GO_REGULATION_OF_DENDRITE_EXTENSION	GO_REGULATION_OF_DENDRITE_EXTENSION		25	0.378144	1.12402	0.273245	0.341845	1	3290	tags=24%, list=6%, signal=26%
GO_NEURON_MIGRATION	GO_NEURON_MIGRATION		164	0.312303	1.12363	0.28	0.342048	1	4861	tags=26%, list=9%, signal=28%
GO_ENDOSOME_TO_LYSOSOME_TRANSPORT	GO_ENDOSOME_TO_LYSOSOME_TRANSPORT		53	0.359743	1.12325	0.320312	0.342227	1	6774	tags=40%, list=12%, signal=45%
GO_MEMBRANE_LIPID_BIOSYNTHETIC_PROCESS	GO_MEMBRANE_LIPID_BIOSYNTHETIC_PROCESS		147	0.300269	1.12292	0.280412	0.342371	1	5829	tags=29%, list=11%, signal=32%
GO_CRANIAL_SKELETAL_SYSTEM_DEVELOPMENT	GO_CRANIAL_SKELETAL_SYSTEM_DEVELOPMENT		68	0.352827	1.12156	0.30127	0.343794	1	9578	tags=50%, list=17%, signal=60%
GO_MATERNAL_PROCESS_INVOLVED_IN_FEMALE_PREGNANCY	GO_MATERNAL_PROCESS_INVOLVED_IN_FEMALE_PREGNANCY		64	0.32225	1.12153	0.268482	0.343544	1	8402	tags=41%, list=15%, signal=48%
GO_POSITIVE_REGULATION_OF_HORMONE_SECRETION	GO_POSITIVE_REGULATION_OF_HORMONE_SECRETION		131	0.286347	1.1209	0.231214	0.34403	1	5654	tags=26%, list=10%, signal=29%
GO_ORGANISM_EMERGENCE_FROM_PROTECTIVE_STRUCTURE	GO_ORGANISM_EMERGENCE_FROM_PROTECTIVE_STRUCTURE		29	0.364988	1.1198	0.311637	0.345151	1	2985	tags=28%, list=5%, signal=29%
GO_MICROTUBULE_ORGANIZING_CENTER_LOCALIZATION	GO_MICROTUBULE_ORGANIZING_CENTER_LOCALIZATION		31	0.426747	1.11976	0.366337	0.344906	1	7302	tags=48%, list=13%, signal=56%
GO_CELLULAR_RESPONSE_TO_UV	GO_CELLULAR_RESPONSE_TO_UV		81	0.318154	1.11941	0.312261	0.345062	1	8560	tags=43%, list=15%, signal=51%
GO_POSITIVE_REGULATION_OF_SMALL_GTPASE_MEDIATED_SIGNAL_TRANSDUCTION	GO_POSITIVE_REGULATION_OF_SMALL_GTPASE_MEDIATED_SIGNAL_TRANSDUCTION		78	0.343076	1.11884	0.318982	0.345488	1	4229	tags=27%, list=8%, signal=29%
GO_ADENYLATE_CYCLASE_INHIBITING_G_PROTEIN_COUPLED_RECEPTOR_SIGNALING_PATHWAY	GO_ADENYLATE_CYCLASE_INHIBITING_G_PROTEIN_COUPLED_RECEPTOR_SIGNALING_PATHWAY		84	0.322974	1.1188	0.29222	0.345249	1	4585	tags=25%, list=8%, signal=27%
GO_PROTEIN_INSERTION_INTO_MEMBRANE	GO_PROTEIN_INSERTION_INTO_MEMBRANE		65	0.319721	1.11789	0.301961	0.346122	1	4355	tags=28%, list=8%, signal=30%
GO_SECONDARY_METABOLITE_BIOSYNTHETIC_PROCESS	GO_SECONDARY_METABOLITE_BIOSYNTHETIC_PROCESS		24	0.37411	1.11776	0.301498	0.346037	1	3894	tags=21%, list=7%, signal=22%
GO_REGULATION_OF_RELEASE_OF_CYTOCHROME_C_FROM_MITOCHONDRIA	GO_REGULATION_OF_RELEASE_OF_CYTOCHROME_C_FROM_MITOCHONDRIA		49	0.322552	1.11747	0.303327	0.346112	1	4951	tags=31%, list=9%, signal=34%
GO_LONG_CHAIN_FATTY_ACID_METABOLIC_PROCESS	GO_LONG_CHAIN_FATTY_ACID_METABOLIC_PROCESS		113	0.292093	1.11735	0.273256	0.345977	1	5211	tags=26%, list=9%, signal=28%
GO_MUSCLE_CELL_APOPTOTIC_PROCESS	GO_MUSCLE_CELL_APOPTOTIC_PROCESS		83	0.297888	1.11729	0.277992	0.34577	1	6058	tags=28%, list=11%, signal=31%
GO_MUSCLE_ADAPTATION	GO_MUSCLE_ADAPTATION		115	0.319591	1.11633	0.325444	0.346751	1	4483	tags=23%, list=8%, signal=25%
GO_B_CELL_ACTIVATION_INVOLVED_IN_IMMUNE_RESPONSE	GO_B_CELL_ACTIVATION_INVOLVED_IN_IMMUNE_RESPONSE		80	0.358655	1.11606	0.34236	0.346803	1	8497	tags=45%, list=15%, signal=53%
GO_REGULATION_OF_CELL_FATE_COMMITMENT	GO_REGULATION_OF_CELL_FATE_COMMITMENT		34	0.341383	1.11556	0.301961	0.347134	1	7099	tags=41%, list=13%, signal=47%
GO_POSITIVE_REGULATION_OF_RELEASE_OF_CYTOCHROME_C_FROM_MITOCHONDRIA	GO_POSITIVE_REGULATION_OF_RELEASE_OF_CYTOCHROME_C_FROM_MITOCHONDRIA		28	0.342767	1.11438	0.292585	0.348333	1	5673	tags=36%, list=10%, signal=40%
GO_CHONDROCYTE_DIFFERENTIATION	GO_CHONDROCYTE_DIFFERENTIATION		107	0.340851	1.11427	0.314563	0.348177	1	3491	tags=25%, list=6%, signal=27%
GO_LONG_CHAIN_FATTY_ACID_BIOSYNTHETIC_PROCESS	GO_LONG_CHAIN_FATTY_ACID_BIOSYNTHETIC_PROCESS		34	0.354259	1.11344	0.293173	0.34901	1	3686	tags=21%, list=7%, signal=22%
GO_DEFENSE_RESPONSE_TO_FUNGUS	GO_DEFENSE_RESPONSE_TO_FUNGUS		41	0.361223	1.1128	0.327161	0.349501	1	7688	tags=29%, list=14%, signal=34%
GO_HYALURONAN_METABOLIC_PROCESS	GO_HYALURONAN_METABOLIC_PROCESS		37	0.348495	1.11233	0.30695	0.349838	1	9378	tags=43%, list=17%, signal=52%
GO_OLIGODENDROCYTE_DIFFERENTIATION	GO_OLIGODENDROCYTE_DIFFERENTIATION		103	0.291172	1.11215	0.291115	0.349788	1	5980	tags=29%, list=11%, signal=33%
GO_POSITIVE_REGULATION_OF_EPITHELIAL_TO_MESENCHYMAL_TRANSITION	GO_POSITIVE_REGULATION_OF_EPITHELIAL_TO_MESENCHYMAL_TRANSITION		49	0.367631	1.11188	0.328872	0.349852	1	6387	tags=41%, list=12%, signal=46%
GO_NEGATIVE_REGULATION_OF_NOTCH_SIGNALING_PATHWAY	GO_NEGATIVE_REGULATION_OF_NOTCH_SIGNALING_PATHWAY		40	0.343582	1.11171	0.299803	0.349776	1	4787	tags=33%, list=9%, signal=36%
GO_NEGATIVE_REGULATION_OF_NF_KAPPAB_TRANSCRIPTION_FACTOR_ACTIVITY	GO_NEGATIVE_REGULATION_OF_NF_KAPPAB_TRANSCRIPTION_FACTOR_ACTIVITY		90	0.305955	1.11152	0.30754	0.349751	1	5411	tags=29%, list=10%, signal=32%
GO_INOSITOL_LIPID_MEDIATED_SIGNALING	GO_INOSITOL_LIPID_MEDIATED_SIGNALING		194	0.297027	1.11138	0.302632	0.349636	1	5360	tags=28%, list=10%, signal=31%
GO_POSITIVE_REGULATION_OF_UBIQUITIN_DEPENDENT_PROTEIN_CATABOLIC_PROCESS	GO_POSITIVE_REGULATION_OF_UBIQUITIN_DEPENDENT_PROTEIN_CATABOLIC_PROCESS		102	0.306576	1.1112	0.297405	0.349582	1	5805	tags=27%, list=10%, signal=31%
GO_LATE_ENDOSOME_TO_VACUOLE_TRANSPORT	GO_LATE_ENDOSOME_TO_VACUOLE_TRANSPORT		25	0.384653	1.11096	0.325103	0.349616	1	4773	tags=28%, list=9%, signal=31%
GO_BRANCHING_INVOLVED_IN_SALIVARY_GLAND_MORPHOGENESIS	GO_BRANCHING_INVOLVED_IN_SALIVARY_GLAND_MORPHOGENESIS		23	0.407034	1.10945	0.358238	0.351225	1	10104	tags=61%, list=18%, signal=74%
GO_PALLIUM_DEVELOPMENT	GO_PALLIUM_DEVELOPMENT		170	0.301846	1.10945	0.289062	0.350946	1	3986	tags=24%, list=7%, signal=25%
GO_POSITIVE_REGULATION_OF_MUSCLE_HYPERTROPHY	GO_POSITIVE_REGULATION_OF_MUSCLE_HYPERTROPHY		34	0.361425	1.10935	0.339114	0.350814	1	4483	tags=21%, list=8%, signal=22%
GO_NEGATIVE_REGULATION_OF_PROTEIN_SERINE_THREONINE_KINASE_ACTIVITY	GO_NEGATIVE_REGULATION_OF_PROTEIN_SERINE_THREONINE_KINASE_ACTIVITY		139	0.29619	1.10917	0.32874	0.350743	1	7426	tags=38%, list=13%, signal=44%
GO_ODONTOGENESIS	GO_ODONTOGENESIS		132	0.316653	1.10893	0.309478	0.350771	1	5466	tags=28%, list=10%, signal=31%
GO_POSITIVE_REGULATION_OF_RHO_PROTEIN_SIGNAL_TRANSDUCTION	GO_POSITIVE_REGULATION_OF_RHO_PROTEIN_SIGNAL_TRANSDUCTION		33	0.38694	1.10832	0.348884	0.351261	1	3884	tags=27%, list=7%, signal=29%
GO_RESPONSE_TO_TUMOR_CELL	GO_RESPONSE_TO_TUMOR_CELL		26	0.382375	1.10828	0.342256	0.351024	1	2889	tags=27%, list=5%, signal=28%
GO_NEGATIVE_REGULATION_OF_MUSCLE_HYPERTROPHY	GO_NEGATIVE_REGULATION_OF_MUSCLE_HYPERTROPHY		34	0.338056	1.10823	0.318182	0.350802	1	4212	tags=24%, list=8%, signal=25%
GO_MITOTIC_G2_M_TRANSITION_CHECKPOINT	GO_MITOTIC_G2_M_TRANSITION_CHECKPOINT		31	0.392032	1.10816	0.376494	0.350622	1	5368	tags=32%, list=10%, signal=36%
GO_TRANSCRIPTION_INITIATION_FROM_RNA_POLYMERASE_I_PROMOTER	GO_TRANSCRIPTION_INITIATION_FROM_RNA_POLYMERASE_I_PROMOTER		38	0.371333	1.10788	0.354125	0.350722	1	4520	tags=24%, list=8%, signal=26%
GO_PROTEIN_O_LINKED_GLYCOSYLATION	GO_PROTEIN_O_LINKED_GLYCOSYLATION		105	0.311805	1.10772	0.292339	0.350633	1	5352	tags=30%, list=10%, signal=34%
GO_REPLACEMENT_OSSIFICATION	GO_REPLACEMENT_OSSIFICATION		29	0.353481	1.10568	0.321773	0.352957	1	3066	tags=28%, list=6%, signal=29%
GO_REGULATION_OF_NOTCH_SIGNALING_PATHWAY	GO_REGULATION_OF_NOTCH_SIGNALING_PATHWAY		106	0.306525	1.10555	0.299242	0.352846	1	5389	tags=31%, list=10%, signal=34%
GO_T_CELL_SELECTION	GO_T_CELL_SELECTION		49	0.434994	1.10554	0.38833	0.352575	1	8193	tags=45%, list=15%, signal=53%
GO_LYTIC_VACUOLE_ORGANIZATION	GO_LYTIC_VACUOLE_ORGANIZATION		67	0.323277	1.10532	0.326572	0.352579	1	6528	tags=33%, list=12%, signal=37%
GO_TRANSCYTOSIS	GO_TRANSCYTOSIS		20	0.375326	1.10495	0.327451	0.35277	1	2343	tags=35%, list=4%, signal=37%
GO_REGULATION_OF_MACROPHAGE_DIFFERENTIATION	GO_REGULATION_OF_MACROPHAGE_DIFFERENTIATION		22	0.391669	1.10462	0.309859	0.352898	1	5487	tags=36%, list=10%, signal=40%
GO_ANTEROGRADE_AXONAL_TRANSPORT	GO_ANTEROGRADE_AXONAL_TRANSPORT		48	0.328839	1.10458	0.323529	0.352677	1	5191	tags=38%, list=9%, signal=41%
GO_PYRIMIDINE_NUCLEOSIDE_METABOLIC_PROCESS	GO_PYRIMIDINE_NUCLEOSIDE_METABOLIC_PROCESS		36	0.35792	1.1044	0.322835	0.35262	1	6900	tags=44%, list=12%, signal=51%
GO_MEMORY	GO_MEMORY		121	0.307818	1.10433	0.311891	0.352445	1	6146	tags=32%, list=11%, signal=36%
GO_CELLULAR_RESPONSE_TO_DRUG	GO_CELLULAR_RESPONSE_TO_DRUG		71	0.310697	1.10428	0.307385	0.352224	1	7762	tags=42%, list=14%, signal=49%
GO_AMINOGLYCAN_METABOLIC_PROCESS	GO_AMINOGLYCAN_METABOLIC_PROCESS		172	0.297982	1.10387	0.299618	0.352432	1	6341	tags=28%, list=11%, signal=31%
GO_POSITIVE_REGULATION_OF_ISOTYPE_SWITCHING	GO_POSITIVE_REGULATION_OF_ISOTYPE_SWITCHING		28	0.377652	1.10375	0.353965	0.352302	1	3322	tags=29%, list=6%, signal=30%
GO_POSITIVE_REGULATION_OF_LAMELLIPODIUM_ORGANIZATION	GO_POSITIVE_REGULATION_OF_LAMELLIPODIUM_ORGANIZATION		33	0.368113	1.10368	0.324675	0.352108	1	5520	tags=36%, list=10%, signal=40%
GO_ENDOSOME_ORGANIZATION	GO_ENDOSOME_ORGANIZATION		79	0.325156	1.10329	0.352941	0.35231	1	6435	tags=30%, list=12%, signal=34%
GO_METANEPHRIC_NEPHRON_MORPHOGENESIS	GO_METANEPHRIC_NEPHRON_MORPHOGENESIS		26	0.357155	1.103	0.30101	0.352384	1	4125	tags=35%, list=7%, signal=37%
GO_MITOPHAGY	GO_MITOPHAGY		25	0.404726	1.10266	0.348697	0.352527	1	4773	tags=36%, list=9%, signal=39%
GO_VESICLE_DOCKING_INVOLVED_IN_EXOCYTOSIS	GO_VESICLE_DOCKING_INVOLVED_IN_EXOCYTOSIS		44	0.337683	1.10247	0.325956	0.352496	1	4281	tags=34%, list=8%, signal=37%
GO_NEGATIVE_REGULATION_OF_DNA_REPLICATION	GO_NEGATIVE_REGULATION_OF_DNA_REPLICATION		34	0.391474	1.10185	0.37232	0.353006	1	4393	tags=26%, list=8%, signal=29%
GO_NEGATIVE_REGULATION_OF_REACTIVE_OXYGEN_SPECIES_METABOLIC_PROCESS	GO_NEGATIVE_REGULATION_OF_REACTIVE_OXYGEN_SPECIES_METABOLIC_PROCESS		63	0.303259	1.10096	0.298279	0.353809	1	7717	tags=38%, list=14%, signal=44%
GO_NEGATIVE_REGULATION_OF_ANIMAL_ORGAN_MORPHOGENESIS	GO_NEGATIVE_REGULATION_OF_ANIMAL_ORGAN_MORPHOGENESIS		34	0.343642	1.10067	0.315488	0.353891	1	3894	tags=35%, list=7%, signal=38%
GO_NEGATIVE_REGULATION_OF_HISTONE_MODIFICATION	GO_NEGATIVE_REGULATION_OF_HISTONE_MODIFICATION		45	0.359136	1.09968	0.3583	0.354886	1	6442	tags=31%, list=12%, signal=35%
GO_RECEPTOR_CLUSTERING	GO_RECEPTOR_CLUSTERING		56	0.303497	1.09953	0.3125	0.354813	1	2957	tags=21%, list=5%, signal=23%
GO_NEUROTRANSMITTER_RECEPTOR_INTERNALIZATION	GO_NEUROTRANSMITTER_RECEPTOR_INTERNALIZATION		27	0.360593	1.09919	0.306796	0.354984	1	5912	tags=30%, list=11%, signal=33%
GO_INSULIN_SECRETION_INVOLVED_IN_CELLULAR_RESPONSE_TO_GLUCOSE_STIMULUS	GO_INSULIN_SECRETION_INVOLVED_IN_CELLULAR_RESPONSE_TO_GLUCOSE_STIMULUS		65	0.29488	1.0989	0.306931	0.355045	1	6024	tags=34%, list=11%, signal=38%
GO_REGULATION_OF_RESPONSE_TO_OXIDATIVE_STRESS	GO_REGULATION_OF_RESPONSE_TO_OXIDATIVE_STRESS		89	0.301809	1.09857	0.301556	0.355188	1	7749	tags=40%, list=14%, signal=47%
GO_NEGATIVE_REGULATION_OF_DEVELOPMENTAL_GROWTH	GO_NEGATIVE_REGULATION_OF_DEVELOPMENTAL_GROWTH		114	0.302659	1.09761	0.337786	0.356144	1	6100	tags=26%, list=11%, signal=30%
GO_NITRIC_OXIDE_MEDIATED_SIGNAL_TRANSDUCTION	GO_NITRIC_OXIDE_MEDIATED_SIGNAL_TRANSDUCTION		29	0.369768	1.09683	0.345098	0.356839	1	5949	tags=34%, list=11%, signal=39%
GO_CHONDROITIN_SULFATE_PROTEOGLYCAN_METABOLIC_PROCESS	GO_CHONDROITIN_SULFATE_PROTEOGLYCAN_METABOLIC_PROCESS		44	0.352829	1.0964	0.331288	0.357142	1	5541	tags=25%, list=10%, signal=28%
GO_BONE_MATURATION	GO_BONE_MATURATION		22	0.377783	1.09628	0.329341	0.357023	1	5159	tags=32%, list=9%, signal=35%
GO_REGULATION_OF_CELLULAR_RESPONSE_TO_VASCULAR_ENDOTHELIAL_GROWTH_FACTOR_STIMULUS	GO_REGULATION_OF_CELLULAR_RESPONSE_TO_VASCULAR_ENDOTHELIAL_GROWTH_FACTOR_STIMULUS		30	0.359235	1.09603	0.341317	0.357081	1	7442	tags=37%, list=13%, signal=42%
GO_EMBRYONIC_FORELIMB_MORPHOGENESIS	GO_EMBRYONIC_FORELIMB_MORPHOGENESIS		33	0.385757	1.09588	0.342105	0.357008	1	5942	tags=30%, list=11%, signal=34%
GO_SOMATIC_DIVERSIFICATION_OF_IMMUNE_RECEPTORS	GO_SOMATIC_DIVERSIFICATION_OF_IMMUNE_RECEPTORS		77	0.347615	1.09587	0.343874	0.356736	1	4632	tags=31%, list=8%, signal=34%
GO_REGULATION_OF_TUMOR_NECROSIS_FACTOR_MEDIATED_SIGNALING_PATHWAY	GO_REGULATION_OF_TUMOR_NECROSIS_FACTOR_MEDIATED_SIGNALING_PATHWAY		60	0.321536	1.0946	0.346154	0.358117	1	6346	tags=32%, list=11%, signal=36%
GO_INOSITOL_PHOSPHATE_METABOLIC_PROCESS	GO_INOSITOL_PHOSPHATE_METABOLIC_PROCESS		72	0.312608	1.09458	0.317121	0.357871	1	4584	tags=28%, list=8%, signal=30%
GO_REGULATION_OF_DNA_DEPENDENT_DNA_REPLICATION	GO_REGULATION_OF_DNA_DEPENDENT_DNA_REPLICATION		52	0.380546	1.0935	0.380671	0.359012	1	6395	tags=37%, list=12%, signal=41%
GO_POSITIVE_REGULATION_OF_COLLAGEN_METABOLIC_PROCESS	GO_POSITIVE_REGULATION_OF_COLLAGEN_METABOLIC_PROCESS		27	0.356643	1.09317	0.332685	0.359135	1	5386	tags=37%, list=10%, signal=41%
GO_REGULATION_OF_STRIATED_MUSCLE_CELL_DIFFERENTIATION	GO_REGULATION_OF_STRIATED_MUSCLE_CELL_DIFFERENTIATION		113	0.306488	1.09315	0.339921	0.358879	1	5828	tags=27%, list=11%, signal=30%
GO_NEUROMUSCULAR_PROCESS	GO_NEUROMUSCULAR_PROCESS		107	0.287098	1.09294	0.289827	0.358859	1	6617	tags=31%, list=12%, signal=35%
GO_REGULATION_OF_OSTEOCLAST_DIFFERENTIATION	GO_REGULATION_OF_OSTEOCLAST_DIFFERENTIATION		67	0.33309	1.09273	0.333973	0.358874	1	5251	tags=31%, list=9%, signal=35%
GO_PROTEIN_LOCALIZATION_TO_VACUOLE	GO_PROTEIN_LOCALIZATION_TO_VACUOLE		68	0.329209	1.0921	0.360887	0.359379	1	5896	tags=31%, list=11%, signal=35%
GO_POSITIVE_REGULATION_OF_MRNA_PROCESSING	GO_POSITIVE_REGULATION_OF_MRNA_PROCESSING		33	0.366304	1.0919	0.355372	0.359342	1	6215	tags=36%, list=11%, signal=41%
GO_MRNA_CLEAVAGE	GO_MRNA_CLEAVAGE		22	0.403318	1.09089	0.369168	0.360414	1	5619	tags=27%, list=10%, signal=30%
GO_NUCLEOSIDE_CATABOLIC_PROCESS	GO_NUCLEOSIDE_CATABOLIC_PROCESS		32	0.358961	1.09047	0.342685	0.360664	1	6900	tags=44%, list=12%, signal=50%
GO_I_KAPPAB_PHOSPHORYLATION	GO_I_KAPPAB_PHOSPHORYLATION		20	0.394311	1.08973	0.345776	0.361277	1	6346	tags=40%, list=11%, signal=45%
GO_REGULATION_OF_ERYTHROCYTE_DIFFERENTIATION	GO_REGULATION_OF_ERYTHROCYTE_DIFFERENTIATION		50	0.342567	1.08956	0.338374	0.361242	1	5052	tags=28%, list=9%, signal=31%
GO_POSITIVE_REGULATION_OF_ORGANELLE_ASSEMBLY	GO_POSITIVE_REGULATION_OF_ORGANELLE_ASSEMBLY		72	0.342033	1.08936	0.357834	0.36122	1	3755	tags=22%, list=7%, signal=24%
GO_POSITIVE_REGULATION_OF_MONOOXYGENASE_ACTIVITY	GO_POSITIVE_REGULATION_OF_MONOOXYGENASE_ACTIVITY		31	0.351208	1.08841	0.342629	0.362117	1	7749	tags=42%, list=14%, signal=49%
GO_FOAM_CELL_DIFFERENTIATION	GO_FOAM_CELL_DIFFERENTIATION		38	0.333006	1.08833	0.319608	0.36193	1	9154	tags=47%, list=17%, signal=57%
GO_MATURATION_OF_SSU_RRNA_FROM_TRICISTRONIC_RRNA_TRANSCRIPT_SSU_RRNA_5_8S_RRNA_LSU_RRNA	GO_MATURATION_OF_SSU_RRNA_FROM_TRICISTRONIC_RRNA_TRANSCRIPT_SSU_RRNA_5_8S_RRNA_LSU_RRNA		38	0.386183	1.08731	0.37931	0.363057	1	7971	tags=39%, list=14%, signal=46%
GO_POSITIVE_REGULATION_OF_DNA_RECOMBINATION	GO_POSITIVE_REGULATION_OF_DNA_RECOMBINATION		45	0.357648	1.08709	0.355159	0.363074	1	3322	tags=24%, list=6%, signal=26%
GO_INNER_EAR_MORPHOGENESIS	GO_INNER_EAR_MORPHOGENESIS		103	0.298041	1.08629	0.323755	0.363798	1	9610	tags=43%, list=17%, signal=52%
GO_NEGATIVE_REGULATION_OF_CHROMOSOME_SEGREGATION	GO_NEGATIVE_REGULATION_OF_CHROMOSOME_SEGREGATION		45	0.354405	1.08555	0.396917	0.364473	1	6036	tags=36%, list=11%, signal=40%
GO_REGULATION_OF_INTRINSIC_APOPTOTIC_SIGNALING_PATHWAY_BY_P53_CLASS_MEDIATOR	GO_REGULATION_OF_INTRINSIC_APOPTOTIC_SIGNALING_PATHWAY_BY_P53_CLASS_MEDIATOR		30	0.338516	1.0847	0.354582	0.365269	1	4837	tags=30%, list=9%, signal=33%
GO_NEGATIVE_REGULATION_OF_RNA_CATABOLIC_PROCESS	GO_NEGATIVE_REGULATION_OF_RNA_CATABOLIC_PROCESS		68	0.338105	1.0844	0.348697	0.365376	1	7678	tags=32%, list=14%, signal=38%
GO_GLYCOSPHINGOLIPID_METABOLIC_PROCESS	GO_GLYCOSPHINGOLIPID_METABOLIC_PROCESS		65	0.313937	1.08338	0.348337	0.366409	1	3953	tags=23%, list=7%, signal=25%
GO_POSITIVE_REGULATION_OF_AUTOPHAGY_OF_MITOCHONDRION	GO_POSITIVE_REGULATION_OF_AUTOPHAGY_OF_MITOCHONDRION		21	0.383256	1.08289	0.360161	0.366775	1	2719	tags=29%, list=5%, signal=30%
GO_PHOSPHATE_ION_TRANSPORT	GO_PHOSPHATE_ION_TRANSPORT		27	0.324391	1.08241	0.302605	0.367091	1	5600	tags=30%, list=10%, signal=33%
GO_PHOSPHATIDYLCHOLINE_ACYL_CHAIN_REMODELING	GO_PHOSPHATIDYLCHOLINE_ACYL_CHAIN_REMODELING		29	0.337442	1.08099	0.356713	0.368623	1	5410	tags=28%, list=10%, signal=31%
GO_ICOSANOID_BIOSYNTHETIC_PROCESS	GO_ICOSANOID_BIOSYNTHETIC_PROCESS		59	0.309622	1.08094	0.328846	0.368409	1	6607	tags=31%, list=12%, signal=35%
GO_NEGATIVE_REGULATION_OF_METAPHASE_ANAPHASE_TRANSITION_OF_CELL_CYCLE	GO_NEGATIVE_REGULATION_OF_METAPHASE_ANAPHASE_TRANSITION_OF_CELL_CYCLE		37	0.376297	1.08069	0.389222	0.368438	1	7283	tags=43%, list=13%, signal=50%
GO_RIBOSOMAL_SMALL_SUBUNIT_ASSEMBLY	GO_RIBOSOMAL_SMALL_SUBUNIT_ASSEMBLY		21	0.454684	1.08021	0.389362	0.368745	1	6887	tags=57%, list=12%, signal=65%
GO_MATURATION_OF_5_8S_RRNA_FROM_TRICISTRONIC_RRNA_TRANSCRIPT_SSU_RRNA_5_8S_RRNA_LSU_RRNA	GO_MATURATION_OF_5_8S_RRNA_FROM_TRICISTRONIC_RRNA_TRANSCRIPT_SSU_RRNA_5_8S_RRNA_LSU_RRNA		25	0.387757	1.07983	0.398406	0.368949	1	8943	tags=40%, list=16%, signal=48%
GO_PROSTANOID_BIOSYNTHETIC_PROCESS	GO_PROSTANOID_BIOSYNTHETIC_PROCESS		30	0.344854	1.07968	0.354455	0.36889	1	6177	tags=40%, list=11%, signal=45%
GO_NEGATIVE_REGULATION_OF_FIBROBLAST_GROWTH_FACTOR_RECEPTOR_SIGNALING_PATHWAY	GO_NEGATIVE_REGULATION_OF_FIBROBLAST_GROWTH_FACTOR_RECEPTOR_SIGNALING_PATHWAY		24	0.35417	1.0787	0.36699	0.369846	1	3940	tags=29%, list=7%, signal=31%
GO_ENDOCYTIC_RECYCLING	GO_ENDOCYTIC_RECYCLING		50	0.345379	1.07857	0.374502	0.369744	1	4325	tags=28%, list=8%, signal=30%
GO_NEGATIVE_REGULATION_OF_NIK_NF_KAPPAB_SIGNALING	GO_NEGATIVE_REGULATION_OF_NIK_NF_KAPPAB_SIGNALING		30	0.353965	1.07844	0.340265	0.369632	1	8393	tags=43%, list=15%, signal=51%
GO_TRANSCRIPTION_ELONGATION_FROM_RNA_POLYMERASE_I_PROMOTER	GO_TRANSCRIPTION_ELONGATION_FROM_RNA_POLYMERASE_I_PROMOTER		30	0.376701	1.07723	0.388889	0.370906	1	4520	tags=23%, list=8%, signal=25%
GO_RESPONSE_TO_THYROID_HORMONE	GO_RESPONSE_TO_THYROID_HORMONE		26	0.345197	1.0767	0.314852	0.371287	1	1063	tags=15%, list=2%, signal=16%
GO_RESPONSE_TO_NICOTINE	GO_RESPONSE_TO_NICOTINE		45	0.325276	1.07526	0.32567	0.372901	1	8037	tags=40%, list=14%, signal=47%
GO_THYMIC_T_CELL_SELECTION	GO_THYMIC_T_CELL_SELECTION		22	0.447341	1.07492	0.409709	0.373051	1	9415	tags=55%, list=17%, signal=66%
GO_PROSTANOID_METABOLIC_PROCESS	GO_PROSTANOID_METABOLIC_PROCESS		49	0.330507	1.0747	0.352475	0.373056	1	6177	tags=31%, list=11%, signal=34%
GO_EXOCRINE_SYSTEM_DEVELOPMENT	GO_EXOCRINE_SYSTEM_DEVELOPMENT		51	0.333449	1.07409	0.340111	0.373586	1	6346	tags=37%, list=11%, signal=42%
GO_POSITIVE_T_CELL_SELECTION	GO_POSITIVE_T_CELL_SELECTION		36	0.448452	1.07388	0.42449	0.373592	1	9415	tags=50%, list=17%, signal=60%
GO_PHOSPHATIDYLINOSITOL_3_KINASE_SIGNALING	GO_PHOSPHATIDYLINOSITOL_3_KINASE_SIGNALING		152	0.292598	1.07249	0.361538	0.375165	1	5570	tags=28%, list=10%, signal=31%
GO_SECRETION_BY_TISSUE	GO_SECRETION_BY_TISSUE		37	0.320169	1.07242	0.353057	0.374982	1	5767	tags=27%, list=10%, signal=30%
GO_INTERLEUKIN_4_PRODUCTION	GO_INTERLEUKIN_4_PRODUCTION		35	0.388405	1.07176	0.40159	0.375547	1	8401	tags=57%, list=15%, signal=67%
GO_POSITIVE_REGULATION_OF_CELL_SUBSTRATE_JUNCTION_ORGANIZATION	GO_POSITIVE_REGULATION_OF_CELL_SUBSTRATE_JUNCTION_ORGANIZATION		29	0.37025	1.07106	0.386847	0.376212	1	3213	tags=31%, list=6%, signal=33%
GO_POSITIVE_REGULATION_OF_NEURON_APOPTOTIC_PROCESS	GO_POSITIVE_REGULATION_OF_NEURON_APOPTOTIC_PROCESS		59	0.295674	1.06985	0.321429	0.377469	1	5159	tags=27%, list=9%, signal=30%
GO_NUCLEAR_ENVELOPE_ORGANIZATION	GO_NUCLEAR_ENVELOPE_ORGANIZATION		52	0.33453	1.06941	0.379518	0.377755	1	4744	tags=27%, list=9%, signal=29%
GO_REGULATION_OF_ISOTYPE_SWITCHING	GO_REGULATION_OF_ISOTYPE_SWITCHING		37	0.353021	1.06932	0.36699	0.377602	1	4154	tags=30%, list=7%, signal=32%
GO_LONG_TERM_SYNAPTIC_POTENTIATION	GO_LONG_TERM_SYNAPTIC_POTENTIATION		87	0.30136	1.06833	0.352826	0.37862	1	7547	tags=38%, list=14%, signal=44%
GO_REGULATION_OF_ADENYLATE_CYCLASE_ACTIVITY	GO_REGULATION_OF_ADENYLATE_CYCLASE_ACTIVITY		32	0.336629	1.06787	0.337891	0.37896	1	6190	tags=38%, list=11%, signal=42%
GO_POSITIVE_REGULATION_OF_CARDIAC_MUSCLE_CELL_DIFFERENTIATION	GO_POSITIVE_REGULATION_OF_CARDIAC_MUSCLE_CELL_DIFFERENTIATION		25	0.356606	1.06771	0.376426	0.378868	1	6726	tags=32%, list=12%, signal=36%
GO_CELLULAR_METABOLIC_COMPOUND_SALVAGE	GO_CELLULAR_METABOLIC_COMPOUND_SALVAGE		34	0.346028	1.06696	0.369427	0.379513	1	6900	tags=38%, list=12%, signal=44%
GO_INTERLEUKIN_7_MEDIATED_SIGNALING_PATHWAY	GO_INTERLEUKIN_7_MEDIATED_SIGNALING_PATHWAY		28	0.350919	1.06685	0.373494	0.379369	1	1499	tags=25%, list=3%, signal=26%
GO_SOMATIC_DIVERSIFICATION_OF_IMMUNOGLOBULINS	GO_SOMATIC_DIVERSIFICATION_OF_IMMUNOGLOBULINS		66	0.33765	1.06646	0.374031	0.379584	1	8497	tags=45%, list=15%, signal=54%
GO_SYNAPTIC_VESICLE_TRANSPORT	GO_SYNAPTIC_VESICLE_TRANSPORT		44	0.332202	1.06621	0.38	0.379623	1	5150	tags=36%, list=9%, signal=40%
GO_POSITIVE_REGULATION_OF_ENDOTHELIAL_CELL_DIFFERENTIATION	GO_POSITIVE_REGULATION_OF_ENDOTHELIAL_CELL_DIFFERENTIATION		25	0.351767	1.06519	0.358333	0.380697	1	5789	tags=36%, list=10%, signal=40%
GO_REGULATION_OF_NITRIC_OXIDE_SYNTHASE_ACTIVITY	GO_REGULATION_OF_NITRIC_OXIDE_SYNTHASE_ACTIVITY		52	0.312913	1.06511	0.354207	0.380516	1	2164	tags=17%, list=4%, signal=18%
GO_PHOSPHOLIPASE_C_ACTIVATING_G_PROTEIN_COUPLED_RECEPTOR_SIGNALING_PATHWAY	GO_PHOSPHOLIPASE_C_ACTIVATING_G_PROTEIN_COUPLED_RECEPTOR_SIGNALING_PATHWAY		104	0.303574	1.06453	0.355731	0.380982	1	5122	tags=28%, list=9%, signal=31%
GO_REGULATION_OF_ANOIKIS	GO_REGULATION_OF_ANOIKIS		24	0.346892	1.06388	0.396794	0.381544	1	3120	tags=25%, list=6%, signal=26%
GO_NCRNA_TRANSCRIPTION	GO_NCRNA_TRANSCRIPTION		109	0.330105	1.06288	0.423935	0.382543	1	5087	tags=27%, list=9%, signal=29%
GO_B_CELL_DIFFERENTIATION	GO_B_CELL_DIFFERENTIATION		137	0.314543	1.06287	0.373281	0.382268	1	6338	tags=33%, list=11%, signal=37%
GO_ESTABLISHMENT_OF_PROTEIN_LOCALIZATION_TO_VACUOLE	GO_ESTABLISHMENT_OF_PROTEIN_LOCALIZATION_TO_VACUOLE		52	0.340676	1.06157	0.403259	0.38364	1	5896	tags=35%, list=11%, signal=39%
GO_REGULATION_OF_MACROAUTOPHAGY	GO_REGULATION_OF_MACROAUTOPHAGY		176	0.300906	1.06148	0.380228	0.383487	1	5225	tags=26%, list=9%, signal=28%
GO_MAINTENANCE_OF_PROTEIN_LOCATION_IN_CELL	GO_MAINTENANCE_OF_PROTEIN_LOCATION_IN_CELL		63	0.302525	1.06111	0.374753	0.38365	1	5973	tags=35%, list=11%, signal=39%
GO_ORGANELLE_TRANSPORT_ALONG_MICROTUBULE	GO_ORGANELLE_TRANSPORT_ALONG_MICROTUBULE		85	0.327341	1.06059	0.395626	0.384046	1	5191	tags=34%, list=9%, signal=38%
GO_ANTIBACTERIAL_HUMORAL_RESPONSE	GO_ANTIBACTERIAL_HUMORAL_RESPONSE		59	0.343985	1.06048	0.364173	0.383888	1	10883	tags=46%, list=20%, signal=57%
GO_OLIGOSACCHARIDE_METABOLIC_PROCESS	GO_OLIGOSACCHARIDE_METABOLIC_PROCESS		53	0.302104	1.06027	0.361742	0.383881	1	2162	tags=17%, list=4%, signal=18%
GO_RIBOSOME_ASSEMBLY	GO_RIBOSOME_ASSEMBLY		67	0.366782	1.05879	0.401674	0.385432	1	6887	tags=45%, list=12%, signal=51%
GO_ANION_HOMEOSTASIS	GO_ANION_HOMEOSTASIS		62	0.285095	1.05679	0.357576	0.387756	1	2436	tags=16%, list=4%, signal=17%
GO_POSITIVE_REGULATION_OF_MRNA_CATABOLIC_PROCESS	GO_POSITIVE_REGULATION_OF_MRNA_CATABOLIC_PROCESS		50	0.361689	1.05638	0.416342	0.388006	1	5935	tags=32%, list=11%, signal=36%
GO_NEGATIVE_REGULATION_OF_CHROMATIN_ORGANIZATION	GO_NEGATIVE_REGULATION_OF_CHROMATIN_ORGANIZATION		64	0.323742	1.05612	0.393574	0.388074	1	6952	tags=28%, list=13%, signal=32%
GO_SALIVARY_GLAND_DEVELOPMENT	GO_SALIVARY_GLAND_DEVELOPMENT		39	0.339033	1.05399	0.392045	0.39069	1	6346	tags=41%, list=11%, signal=46%
GO_NEGATIVE_REGULATION_OF_MYELOID_LEUKOCYTE_DIFFERENTIATION	GO_NEGATIVE_REGULATION_OF_MYELOID_LEUKOCYTE_DIFFERENTIATION		51	0.305298	1.05258	0.367537	0.392229	1	5487	tags=27%, list=10%, signal=30%
GO_REGULATION_OF_VOLTAGE_GATED_CALCIUM_CHANNEL_ACTIVITY	GO_REGULATION_OF_VOLTAGE_GATED_CALCIUM_CHANNEL_ACTIVITY		36	0.318127	1.05247	0.366667	0.392092	1	4885	tags=31%, list=9%, signal=33%
GO_VESICLE_MEDIATED_TRANSPORT_BETWEEN_ENDOSOMAL_COMPARTMENTS	GO_VESICLE_MEDIATED_TRANSPORT_BETWEEN_ENDOSOMAL_COMPARTMENTS		42	0.354485	1.05228	0.406746	0.392034	1	5866	tags=29%, list=11%, signal=32%
GO_CYTOLYSIS	GO_CYTOLYSIS		29	0.399033	1.05216	0.42161	0.391888	1	12229	tags=55%, list=22%, signal=71%
GO_NEGATIVE_REGULATION_OF_EPITHELIAL_CELL_MIGRATION	GO_NEGATIVE_REGULATION_OF_EPITHELIAL_CELL_MIGRATION		107	0.271508	1.05137	0.359684	0.392627	1	3940	tags=17%, list=7%, signal=18%
GO_SMOOTH_MUSCLE_CELL_APOPTOTIC_PROCESS	GO_SMOOTH_MUSCLE_CELL_APOPTOTIC_PROCESS		28	0.338351	1.05054	0.389513	0.393382	1	5969	tags=25%, list=11%, signal=28%
GO_DNA_DEALKYLATION	GO_DNA_DEALKYLATION		34	0.336513	1.04932	0.404382	0.394733	1	6886	tags=38%, list=12%, signal=44%
GO_REGULATION_OF_INSULIN_LIKE_GROWTH_FACTOR_RECEPTOR_SIGNALING_PATHWAY	GO_REGULATION_OF_INSULIN_LIKE_GROWTH_FACTOR_RECEPTOR_SIGNALING_PATHWAY		24	0.346894	1.04922	0.391813	0.394565	1	2820	tags=17%, list=5%, signal=18%
GO_MULTIVESICULAR_BODY_ORGANIZATION	GO_MULTIVESICULAR_BODY_ORGANIZATION		31	0.365122	1.0484	0.398734	0.395313	1	6306	tags=29%, list=11%, signal=33%
GO_ASTROCYTE_DIFFERENTIATION	GO_ASTROCYTE_DIFFERENTIATION		82	0.289643	1.04785	0.36862	0.395793	1	4503	tags=24%, list=8%, signal=27%
GO_SYNAPSE_ASSEMBLY	GO_SYNAPSE_ASSEMBLY		184	0.279728	1.04696	0.379888	0.396697	1	4206	tags=21%, list=8%, signal=22%
GO_REGULATION_OF_CENTROSOME_CYCLE	GO_REGULATION_OF_CENTROSOME_CYCLE		59	0.331241	1.04688	0.412475	0.396518	1	4170	tags=25%, list=8%, signal=27%
GO_IRON_ION_HOMEOSTASIS	GO_IRON_ION_HOMEOSTASIS		87	0.276917	1.04172	0.38843	0.403082	1	5218	tags=24%, list=9%, signal=27%
GO_BLASTODERM_SEGMENTATION	GO_BLASTODERM_SEGMENTATION		20	0.341769	1.04127	0.381853	0.403418	1	5237	tags=30%, list=9%, signal=33%
GO_NEGATIVE_REGULATION_OF_PROTEIN_LOCALIZATION_TO_NUCLEUS	GO_NEGATIVE_REGULATION_OF_PROTEIN_LOCALIZATION_TO_NUCLEUS		31	0.338884	1.04099	0.411306	0.40348	1	5193	tags=35%, list=9%, signal=39%
GO_P38MAPK_CASCADE	GO_P38MAPK_CASCADE		51	0.308459	1.04065	0.409543	0.403682	1	6177	tags=31%, list=11%, signal=35%
GO_DIGESTIVE_TRACT_MORPHOGENESIS	GO_DIGESTIVE_TRACT_MORPHOGENESIS		49	0.334363	1.04034	0.387097	0.40379	1	6542	tags=37%, list=12%, signal=42%
GO_POSITIVE_REGULATION_OF_CHROMOSOME_ORGANIZATION	GO_POSITIVE_REGULATION_OF_CHROMOSOME_ORGANIZATION		182	0.308351	1.04034	0.412916	0.403502	1	7045	tags=35%, list=13%, signal=40%
GO_EAR_MORPHOGENESIS	GO_EAR_MORPHOGENESIS		123	0.278511	1.04029	0.378026	0.403269	1	9610	tags=41%, list=17%, signal=49%
GO_FACE_DEVELOPMENT	GO_FACE_DEVELOPMENT		48	0.332091	1.03953	0.417647	0.403934	1	4005	tags=27%, list=7%, signal=29%
GO_NEGATIVE_REGULATION_OF_CALCIUM_ION_TRANSPORT	GO_NEGATIVE_REGULATION_OF_CALCIUM_ION_TRANSPORT		59	0.309502	1.03894	0.384146	0.404465	1	4970	tags=24%, list=9%, signal=26%
GO_RNA_DESTABILIZATION	GO_RNA_DESTABILIZATION		35	0.366818	1.03829	0.442085	0.405084	1	5935	tags=31%, list=11%, signal=35%
GO_MICROTUBULE_DEPOLYMERIZATION	GO_MICROTUBULE_DEPOLYMERIZATION		46	0.33036	1.03829	0.404762	0.404791	1	6383	tags=33%, list=12%, signal=37%
GO_B_CELL_HOMEOSTASIS	GO_B_CELL_HOMEOSTASIS		29	0.404504	1.03783	0.441006	0.405082	1	5130	tags=38%, list=9%, signal=42%
GO_RIG_I_SIGNALING_PATHWAY	GO_RIG_I_SIGNALING_PATHWAY		25	0.342874	1.03689	0.414062	0.406047	1	3834	tags=24%, list=7%, signal=26%
GO_CD8_POSITIVE_ALPHA_BETA_T_CELL_ACTIVATION	GO_CD8_POSITIVE_ALPHA_BETA_T_CELL_ACTIVATION		27	0.41252	1.03683	0.429142	0.405844	1	7963	tags=52%, list=14%, signal=61%
GO_NEGATIVE_REGULATION_OF_CELL_CYCLE_G2_M_PHASE_TRANSITION	GO_NEGATIVE_REGULATION_OF_CELL_CYCLE_G2_M_PHASE_TRANSITION		103	0.316599	1.03643	0.428571	0.406095	1	7684	tags=33%, list=14%, signal=38%
GO_REGULATION_OF_SIGNALING_RECEPTOR_ACTIVITY	GO_REGULATION_OF_SIGNALING_RECEPTOR_ACTIVITY		173	0.27345	1.03627	0.380952	0.406014	1	6269	tags=28%, list=11%, signal=31%
GO_CELLULAR_RESPONSE_TO_VITAMIN_D	GO_CELLULAR_RESPONSE_TO_VITAMIN_D		23	0.336367	1.036	0.392523	0.406035	1	5025	tags=22%, list=9%, signal=24%
GO_POSITIVE_REGULATION_OF_TRANSCRIPTION_BY_RNA_POLYMERASE_I	GO_POSITIVE_REGULATION_OF_TRANSCRIPTION_BY_RNA_POLYMERASE_I		21	0.399387	1.03567	0.468	0.406213	1	3554	tags=29%, list=6%, signal=31%
GO_IRON_ION_TRANSPORT	GO_IRON_ION_TRANSPORT		79	0.275161	1.03473	0.38477	0.407199	1	4942	tags=24%, list=9%, signal=26%
GO_REGULATION_OF_PROTEIN_ACETYLATION	GO_REGULATION_OF_PROTEIN_ACETYLATION		74	0.29537	1.03357	0.403442	0.408414	1	6177	tags=32%, list=11%, signal=36%
GO_MITOTIC_RECOMBINATION	GO_MITOTIC_RECOMBINATION		22	0.38864	1.03275	0.446429	0.409213	1	5509	tags=36%, list=10%, signal=40%
GO_CHROMOSOME_ORGANIZATION_INVOLVED_IN_MEIOTIC_CELL_CYCLE	GO_CHROMOSOME_ORGANIZATION_INVOLVED_IN_MEIOTIC_CELL_CYCLE		70	0.306698	1.03252	0.42515	0.40922	1	6583	tags=37%, list=12%, signal=42%
GO_POSITIVE_REGULATION_OF_PROTEIN_AUTOPHOSPHORYLATION	GO_POSITIVE_REGULATION_OF_PROTEIN_AUTOPHOSPHORYLATION		27	0.369273	1.03244	0.444882	0.409031	1	4632	tags=41%, list=8%, signal=44%
GO_CHROMATIN_SILENCING	GO_CHROMATIN_SILENCING		77	0.305728	1.03089	0.427711	0.410851	1	4677	tags=23%, list=8%, signal=25%
GO_POSITIVE_REGULATION_OF_LAMELLIPODIUM_ASSEMBLY	GO_POSITIVE_REGULATION_OF_LAMELLIPODIUM_ASSEMBLY		25	0.3579	1.03053	0.43985	0.411031	1	5520	tags=36%, list=10%, signal=40%
GO_POSITIVE_REGULATION_OF_INSULIN_SECRETION	GO_POSITIVE_REGULATION_OF_INSULIN_SECRETION		74	0.290205	1.02904	0.39645	0.412751	1	4182	tags=23%, list=8%, signal=25%
GO_REGULATION_OF_B_CELL_DIFFERENTIATION	GO_REGULATION_OF_B_CELL_DIFFERENTIATION		29	0.364129	1.02867	0.417795	0.412985	1	6205	tags=34%, list=11%, signal=39%
GO_REGULATION_OF_SYNAPTIC_VESICLE_RECYCLING	GO_REGULATION_OF_SYNAPTIC_VESICLE_RECYCLING		25	0.348315	1.02723	0.419802	0.414629	1	4569	tags=36%, list=8%, signal=39%
GO_NEGATIVE_REGULATION_OF_CANONICAL_WNT_SIGNALING_PATHWAY	GO_NEGATIVE_REGULATION_OF_CANONICAL_WNT_SIGNALING_PATHWAY		180	0.268407	1.02637	0.408203	0.415563	1	6154	tags=26%, list=11%, signal=29%
GO_REGULATION_OF_MEMBRANE_LIPID_DISTRIBUTION	GO_REGULATION_OF_MEMBRANE_LIPID_DISTRIBUTION		53	0.309012	1.02567	0.427723	0.41623	1	5051	tags=26%, list=9%, signal=29%
GO_NUCLEOTIDE_EXCISION_REPAIR_PREINCISION_COMPLEX_ASSEMBLY	GO_NUCLEOTIDE_EXCISION_REPAIR_PREINCISION_COMPLEX_ASSEMBLY		29	0.353579	1.02551	0.453815	0.416171	1	5158	tags=31%, list=9%, signal=34%
GO_ENDOTHELIAL_CELL_CHEMOTAXIS	GO_ENDOTHELIAL_CELL_CHEMOTAXIS		31	0.317838	1.02537	0.420732	0.416067	1	1481	tags=16%, list=3%, signal=17%
GO_RESPONSE_TO_PLATELET_DERIVED_GROWTH_FACTOR	GO_RESPONSE_TO_PLATELET_DERIVED_GROWTH_FACTOR		23	0.379008	1.02478	0.422619	0.41655	1	5036	tags=30%, list=9%, signal=33%
GO_POSITIVE_REGULATION_OF_PHOSPHOLIPASE_ACTIVITY	GO_POSITIVE_REGULATION_OF_PHOSPHOLIPASE_ACTIVITY		62	0.304912	1.02452	0.407619	0.416613	1	5912	tags=32%, list=11%, signal=36%
GO_PROTEASOMAL_UBIQUITIN_INDEPENDENT_PROTEIN_CATABOLIC_PROCESS	GO_PROTEASOMAL_UBIQUITIN_INDEPENDENT_PROTEIN_CATABOLIC_PROCESS		22	0.446873	1.02442	0.460922	0.416446	1	9697	tags=41%, list=17%, signal=50%
GO_NEGATIVE_REGULATION_OF_PROTEIN_LOCALIZATION_TO_CELL_PERIPHERY	GO_NEGATIVE_REGULATION_OF_PROTEIN_LOCALIZATION_TO_CELL_PERIPHERY		25	0.357842	1.02414	0.412088	0.416522	1	4929	tags=28%, list=9%, signal=31%
GO_SUPEROXIDE_METABOLIC_PROCESS	GO_SUPEROXIDE_METABOLIC_PROCESS		73	0.294975	1.02396	0.405039	0.416456	1	3884	tags=27%, list=7%, signal=29%
GO_POSITIVE_REGULATION_OF_DNA_BINDING	GO_POSITIVE_REGULATION_OF_DNA_BINDING		59	0.287767	1.02367	0.380952	0.416558	1	5741	tags=27%, list=10%, signal=30%
GO_APOPTOTIC_PROCESS_INVOLVED_IN_DEVELOPMENT	GO_APOPTOTIC_PROCESS_INVOLVED_IN_DEVELOPMENT		38	0.321358	1.02321	0.418288	0.416903	1	6398	tags=34%, list=12%, signal=39%
GO_EPITHELIAL_CELL_MORPHOGENESIS	GO_EPITHELIAL_CELL_MORPHOGENESIS		36	0.330223	1.02276	0.439306	0.417206	1	3166	tags=25%, list=6%, signal=26%
GO_CALCINEURIN_MEDIATED_SIGNALING	GO_CALCINEURIN_MEDIATED_SIGNALING		49	0.301284	1.02236	0.424303	0.417443	1	3145	tags=16%, list=6%, signal=17%
GO_REGULATION_OF_SPINDLE_ORGANIZATION	GO_REGULATION_OF_SPINDLE_ORGANIZATION		38	0.337029	1.02178	0.428571	0.417892	1	4745	tags=26%, list=9%, signal=29%
GO_REGULATION_OF_HEMATOPOIETIC_STEM_CELL_DIFFERENTIATION	GO_REGULATION_OF_HEMATOPOIETIC_STEM_CELL_DIFFERENTIATION		73	0.316501	1.02173	0.454183	0.417648	1	6154	tags=29%, list=11%, signal=32%
GO_MUSCLE_HYPERTROPHY	GO_MUSCLE_HYPERTROPHY		96	0.293647	1.02157	0.439842	0.417589	1	4483	tags=22%, list=8%, signal=24%
GO_CORPUS_CALLOSUM_DEVELOPMENT	GO_CORPUS_CALLOSUM_DEVELOPMENT		20	0.355176	1.02083	0.434426	0.41835	1	1074	tags=15%, list=2%, signal=15%
GO_REGULATION_OF_CHROMOSOME_SEPARATION	GO_REGULATION_OF_CHROMOSOME_SEPARATION		66	0.326993	1.01959	0.460474	0.419727	1	7567	tags=41%, list=14%, signal=47%
GO_LABYRINTHINE_LAYER_MORPHOGENESIS	GO_LABYRINTHINE_LAYER_MORPHOGENESIS		21	0.362189	1.01953	0.441767	0.419521	1	724	tags=14%, list=1%, signal=14%
GO_FORELIMB_MORPHOGENESIS	GO_FORELIMB_MORPHOGENESIS		41	0.337401	1.0176	0.437148	0.421855	1	5942	tags=27%, list=11%, signal=30%
GO_POSITIVE_REGULATION_OF_MUSCLE_CELL_DIFFERENTIATION	GO_POSITIVE_REGULATION_OF_MUSCLE_CELL_DIFFERENTIATION		100	0.282422	1.01647	0.437859	0.423006	1	5379	tags=27%, list=10%, signal=30%
GO_REGULATION_OF_VASCULAR_ASSOCIATED_SMOOTH_MUSCLE_CELL_PROLIFERATION	GO_REGULATION_OF_VASCULAR_ASSOCIATED_SMOOTH_MUSCLE_CELL_PROLIFERATION		74	0.279158	1.01591	0.426641	0.423495	1	8512	tags=31%, list=15%, signal=37%
GO_REGULATION_OF_CELLULAR_RESPONSE_TO_HEAT	GO_REGULATION_OF_CELLULAR_RESPONSE_TO_HEAT		79	0.330912	1.01503	0.434535	0.424399	1	6588	tags=32%, list=12%, signal=36%
GO_NEGATIVE_REGULATION_OF_TRANSCRIPTION_REGULATORY_REGION_DNA_BINDING	GO_NEGATIVE_REGULATION_OF_TRANSCRIPTION_REGULATORY_REGION_DNA_BINDING		21	0.33181	1.01477	0.424742	0.424466	1	5939	tags=24%, list=11%, signal=27%
GO_CELL_DEATH_IN_RESPONSE_TO_HYDROGEN_PEROXIDE	GO_CELL_DEATH_IN_RESPONSE_TO_HYDROGEN_PEROXIDE		26	0.32501	1.01393	0.424742	0.425304	1	5411	tags=31%, list=10%, signal=34%
GO_AUTOPHAGY_OF_MITOCHONDRION	GO_AUTOPHAGY_OF_MITOCHONDRION		78	0.300242	1.01161	0.4294	0.42806	1	6467	tags=32%, list=12%, signal=36%
GO_NEGATIVE_REGULATION_OF_MRNA_METABOLIC_PROCESS	GO_NEGATIVE_REGULATION_OF_MRNA_METABOLIC_PROCESS		88	0.313738	1.00957	0.432653	0.430525	1	7678	tags=31%, list=14%, signal=36%
GO_REGULATION_OF_LIPID_STORAGE	GO_REGULATION_OF_LIPID_STORAGE		50	0.303991	1.00942	0.455769	0.430431	1	7086	tags=36%, list=13%, signal=41%
GO_CELLULAR_RESPONSE_TO_DEXAMETHASONE_STIMULUS	GO_CELLULAR_RESPONSE_TO_DEXAMETHASONE_STIMULUS		31	0.318415	1.00784	0.463035	0.432338	1	5821	tags=32%, list=10%, signal=36%
GO_GOLGI_TO_PLASMA_MEMBRANE_TRANSPORT	GO_GOLGI_TO_PLASMA_MEMBRANE_TRANSPORT		60	0.325269	1.00763	0.453465	0.432341	1	5514	tags=28%, list=10%, signal=31%
GO_DNA_DEMETHYLATION	GO_DNA_DEMETHYLATION		28	0.344431	1.00761	0.446429	0.432056	1	6886	tags=39%, list=12%, signal=45%
GO_NEGATIVE_REGULATION_OF_CALCIUM_MEDIATED_SIGNALING	GO_NEGATIVE_REGULATION_OF_CALCIUM_MEDIATED_SIGNALING		30	0.328682	1.00678	0.449505	0.432892	1	6502	tags=33%, list=12%, signal=38%
GO_ESTABLISHMENT_OF_PROTEIN_LOCALIZATION_TO_ENDOPLASMIC_RETICULUM	GO_ESTABLISHMENT_OF_PROTEIN_LOCALIZATION_TO_ENDOPLASMIC_RETICULUM		120	0.408067	1.00608	0.502058	0.433528	1	8544	tags=53%, list=15%, signal=63%
GO_TRANSLESION_SYNTHESIS	GO_TRANSLESION_SYNTHESIS		42	0.334717	1.0054	0.458248	0.434184	1	5158	tags=31%, list=9%, signal=34%
GO_NEGATIVE_REGULATION_OF_EPITHELIAL_CELL_DIFFERENTIATION	GO_NEGATIVE_REGULATION_OF_EPITHELIAL_CELL_DIFFERENTIATION		49	0.306118	1.0048	0.443798	0.43467	1	7512	tags=41%, list=14%, signal=47%
GO_SPINDLE_ORGANIZATION	GO_SPINDLE_ORGANIZATION		182	0.298071	1.00279	0.460474	0.437049	1	6036	tags=33%, list=11%, signal=37%
GO_MUCOPOLYSACCHARIDE_METABOLIC_PROCESS	GO_MUCOPOLYSACCHARIDE_METABOLIC_PROCESS		113	0.279439	1.00247	0.444444	0.437169	1	8017	tags=33%, list=14%, signal=38%
GO_REGULATION_OF_PRODUCTION_OF_SMALL_RNA_INVOLVED_IN_GENE_SILENCING_BY_RNA	GO_REGULATION_OF_PRODUCTION_OF_SMALL_RNA_INVOLVED_IN_GENE_SILENCING_BY_RNA		24	0.344069	1.00244	0.452975	0.4369	1	6346	tags=46%, list=11%, signal=52%
GO_RESPONSE_TO_ACETYLCHOLINE	GO_RESPONSE_TO_ACETYLCHOLINE		29	0.345998	1.00158	0.457627	0.437776	1	6556	tags=34%, list=12%, signal=39%
GO_KILLING_OF_CELLS_OF_OTHER_ORGANISM	GO_KILLING_OF_CELLS_OF_OTHER_ORGANISM		65	0.310655	0.999427	0.445344	0.440434	1	10309	tags=35%, list=19%, signal=43%
GO_PROTEOGLYCAN_METABOLIC_PROCESS	GO_PROTEOGLYCAN_METABOLIC_PROCESS		90	0.306986	0.99808	0.461832	0.441987	1	5903	tags=27%, list=11%, signal=30%
GO_ACTIVATION_OF_PROTEIN_KINASE_B_ACTIVITY	GO_ACTIVATION_OF_PROTEIN_KINASE_B_ACTIVITY		32	0.317548	0.997816	0.458661	0.442018	1	4956	tags=28%, list=9%, signal=31%
GO_MORPHOGENESIS_OF_AN_EPITHELIAL_SHEET	GO_MORPHOGENESIS_OF_AN_EPITHELIAL_SHEET		58	0.321443	0.997313	0.473373	0.442362	1	6080	tags=38%, list=11%, signal=43%
GO_CALCIUM_ION_IMPORT_INTO_CYTOSOL	GO_CALCIUM_ION_IMPORT_INTO_CYTOSOL		21	0.362601	0.996744	0.451172	0.44285	1	7426	tags=43%, list=13%, signal=49%
GO_NEGATIVE_REGULATION_OF_PROTEIN_LOCALIZATION_TO_MEMBRANE	GO_NEGATIVE_REGULATION_OF_PROTEIN_LOCALIZATION_TO_MEMBRANE		31	0.320162	0.996269	0.44697	0.443184	1	4929	tags=29%, list=9%, signal=32%
GO_PROTEIN_KINASE_C_ACTIVATING_G_PROTEIN_COUPLED_RECEPTOR_SIGNALING_PATHWAY	GO_PROTEIN_KINASE_C_ACTIVATING_G_PROTEIN_COUPLED_RECEPTOR_SIGNALING_PATHWAY		28	0.333425	0.99585	0.460159	0.443444	1	2509	tags=25%, list=5%, signal=26%
GO_NEGATIVE_REGULATION_OF_PROTEIN_TYROSINE_KINASE_ACTIVITY	GO_NEGATIVE_REGULATION_OF_PROTEIN_TYROSINE_KINASE_ACTIVITY		29	0.319271	0.995382	0.45614	0.443825	1	4788	tags=31%, list=9%, signal=34%
GO_DENDRITE_EXTENSION	GO_DENDRITE_EXTENSION		36	0.312874	0.993999	0.455744	0.445546	1	3563	tags=22%, list=6%, signal=24%
GO_LUNG_MORPHOGENESIS	GO_LUNG_MORPHOGENESIS		52	0.322572	0.993828	0.449438	0.445471	1	6856	tags=31%, list=12%, signal=35%
GO_POSITIVE_REGULATION_OF_MESONEPHROS_DEVELOPMENT	GO_POSITIVE_REGULATION_OF_MESONEPHROS_DEVELOPMENT		21	0.355723	0.99319	0.465887	0.446074	1	3433	tags=24%, list=6%, signal=25%
GO_POSTSYNAPTIC_MEMBRANE_ORGANIZATION	GO_POSTSYNAPTIC_MEMBRANE_ORGANIZATION		41	0.296131	0.993051	0.445545	0.445948	1	6944	tags=34%, list=13%, signal=39%
GO_TRANSCRIPTION_PREINITIATION_COMPLEX_ASSEMBLY	GO_TRANSCRIPTION_PREINITIATION_COMPLEX_ASSEMBLY		36	0.339593	0.992866	0.470825	0.445894	1	6727	tags=33%, list=12%, signal=38%
GO_REGULATION_OF_COLLATERAL_SPROUTING	GO_REGULATION_OF_COLLATERAL_SPROUTING		20	0.339774	0.992104	0.45935	0.44665	1	6426	tags=40%, list=12%, signal=45%
GO_REGULATION_OF_HISTONE_H3_K9_METHYLATION	GO_REGULATION_OF_HISTONE_H3_K9_METHYLATION		23	0.351941	0.99125	0.476378	0.447504	1	6991	tags=35%, list=13%, signal=40%
GO_REGULATION_OF_HYDROGEN_PEROXIDE_METABOLIC_PROCESS	GO_REGULATION_OF_HYDROGEN_PEROXIDE_METABOLIC_PROCESS		21	0.320062	0.99117	0.470238	0.447308	1	7018	tags=38%, list=13%, signal=44%
GO_POSITIVE_REGULATION_OF_MAST_CELL_ACTIVATION	GO_POSITIVE_REGULATION_OF_MAST_CELL_ACTIVATION		22	0.329657	0.991107	0.453782	0.447103	1	7544	tags=41%, list=14%, signal=47%
GO_STARTLE_RESPONSE	GO_STARTLE_RESPONSE		28	0.312327	0.990285	0.476744	0.447932	1	3897	tags=25%, list=7%, signal=27%
GO_CELL_ADHESION_MOLECULE_PRODUCTION	GO_CELL_ADHESION_MOLECULE_PRODUCTION		20	0.332369	0.990124	0.477551	0.447846	1	6177	tags=35%, list=11%, signal=39%
GO_LIPID_TRANSLOCATION	GO_LIPID_TRANSLOCATION		47	0.30745	0.989706	0.482759	0.448145	1	5051	tags=26%, list=9%, signal=28%
GO_REGULATION_OF_SYNAPSE_ASSEMBLY	GO_REGULATION_OF_SYNAPSE_ASSEMBLY		107	0.275315	0.98803	0.445283	0.450127	1	4206	tags=20%, list=8%, signal=21%
GO_REGULATION_OF_T_CELL_DIFFERENTIATION_IN_THYMUS	GO_REGULATION_OF_T_CELL_DIFFERENTIATION_IN_THYMUS		27	0.3665	0.987466	0.477011	0.450646	1	9933	tags=59%, list=18%, signal=72%
GO_NEGATIVE_REGULATION_OF_LYASE_ACTIVITY	GO_NEGATIVE_REGULATION_OF_LYASE_ACTIVITY		26	0.324091	0.986944	0.456274	0.451053	1	6190	tags=35%, list=11%, signal=39%
GO_GLYCOSYL_COMPOUND_BIOSYNTHETIC_PROCESS	GO_GLYCOSYL_COMPOUND_BIOSYNTHETIC_PROCESS		43	0.297871	0.983978	0.490446	0.454987	1	5594	tags=28%, list=10%, signal=31%
GO_NEGATIVE_REGULATION_OF_DNA_RECOMBINATION	GO_NEGATIVE_REGULATION_OF_DNA_RECOMBINATION		44	0.313273	0.981989	0.490347	0.457494	1	4413	tags=30%, list=8%, signal=32%
GO_CLEAVAGE_INVOLVED_IN_RRNA_PROCESSING	GO_CLEAVAGE_INVOLVED_IN_RRNA_PROCESSING		28	0.362716	0.9804	0.487654	0.459544	1	8943	tags=43%, list=16%, signal=51%
GO_POLYSACCHARIDE_CATABOLIC_PROCESS	GO_POLYSACCHARIDE_CATABOLIC_PROCESS		26	0.315147	0.98003	0.507722	0.459746	1	3549	tags=23%, list=6%, signal=25%
GO_METAPHASE_ANAPHASE_TRANSITION_OF_CELL_CYCLE	GO_METAPHASE_ANAPHASE_TRANSITION_OF_CELL_CYCLE		60	0.326761	0.979926	0.487952	0.45958	1	7567	tags=42%, list=14%, signal=48%
GO_TERMINATION_OF_RNA_POLYMERASE_I_TRANSCRIPTION	GO_TERMINATION_OF_RNA_POLYMERASE_I_TRANSCRIPTION		31	0.347073	0.97984	0.483101	0.459407	1	4520	tags=23%, list=8%, signal=25%
GO_REGULATION_OF_EXECUTION_PHASE_OF_APOPTOSIS	GO_REGULATION_OF_EXECUTION_PHASE_OF_APOPTOSIS		40	0.306803	0.978973	0.47012	0.460268	1	5232	tags=28%, list=9%, signal=30%
GO_NCRNA_EXPORT_FROM_NUCLEUS	GO_NCRNA_EXPORT_FROM_NUCLEUS		38	0.382306	0.978145	0.497065	0.46112	1	6583	tags=29%, list=12%, signal=33%
GO_NEGATIVE_REGULATION_OF_CALCIUM_ION_TRANSMEMBRANE_TRANSPORT	GO_NEGATIVE_REGULATION_OF_CALCIUM_ION_TRANSMEMBRANE_TRANSPORT		38	0.303598	0.977886	0.467066	0.461191	1	4890	tags=24%, list=9%, signal=26%
GO_MRNA_TRANSPORT	GO_MRNA_TRANSPORT		151	0.310509	0.977881	0.494048	0.460886	1	4536	tags=21%, list=8%, signal=22%
GO_EMBRYONIC_SKELETAL_SYSTEM_DEVELOPMENT	GO_EMBRYONIC_SKELETAL_SYSTEM_DEVELOPMENT		130	0.292123	0.976767	0.474074	0.462133	1	6257	tags=28%, list=11%, signal=31%
GO_IMMUNOGLOBULIN_SECRETION	GO_IMMUNOGLOBULIN_SECRETION		21	0.367319	0.975887	0.509652	0.463052	1	10504	tags=52%, list=19%, signal=65%
GO_PROTEIN_MONOUBIQUITINATION	GO_PROTEIN_MONOUBIQUITINATION		69	0.325568	0.973475	0.498069	0.466043	1	4187	tags=26%, list=8%, signal=28%
GO_ATRIAL_SEPTUM_DEVELOPMENT	GO_ATRIAL_SEPTUM_DEVELOPMENT		23	0.340152	0.971767	0.502783	0.468174	1	3894	tags=26%, list=7%, signal=28%
GO_POST_GOLGI_VESICLE_MEDIATED_TRANSPORT	GO_POST_GOLGI_VESICLE_MEDIATED_TRANSPORT		104	0.309164	0.969725	0.507968	0.470778	1	5863	tags=30%, list=11%, signal=33%
GO_NEGATIVE_REGULATION_OF_ADENYLATE_CYCLASE_ACTIVITY	GO_NEGATIVE_REGULATION_OF_ADENYLATE_CYCLASE_ACTIVITY		20	0.33972	0.96933	0.503802	0.471053	1	6190	tags=40%, list=11%, signal=45%
GO_REGULATION_OF_RESPIRATORY_GASEOUS_EXCHANGE	GO_REGULATION_OF_RESPIRATORY_GASEOUS_EXCHANGE		23	0.312989	0.968743	0.504016	0.471548	1	5156	tags=26%, list=9%, signal=29%
GO_GENITALIA_DEVELOPMENT	GO_GENITALIA_DEVELOPMENT		47	0.296692	0.963377	0.506494	0.479094	1	5237	tags=30%, list=9%, signal=33%
GO_ERROR_PRONE_TRANSLESION_SYNTHESIS	GO_ERROR_PRONE_TRANSLESION_SYNTHESIS		21	0.36285	0.962853	0.50099	0.47953	1	7683	tags=48%, list=14%, signal=55%
GO_KERATAN_SULFATE_METABOLIC_PROCESS	GO_KERATAN_SULFATE_METABOLIC_PROCESS		33	0.298402	0.962089	0.516441	0.480334	1	8302	tags=39%, list=15%, signal=46%
GO_ASYMMETRIC_CELL_DIVISION	GO_ASYMMETRIC_CELL_DIVISION		20	0.344534	0.961418	0.501976	0.480911	1	5520	tags=40%, list=10%, signal=44%
GO_HEMATOPOIETIC_STEM_CELL_DIFFERENTIATION	GO_HEMATOPOIETIC_STEM_CELL_DIFFERENTIATION		87	0.284229	0.95998	0.513026	0.482637	1	6154	tags=29%, list=11%, signal=32%
GO_NEGATIVE_REGULATION_OF_PRODUCTION_OF_MOLECULAR_MEDIATOR_OF_IMMUNE_RESPONSE	GO_NEGATIVE_REGULATION_OF_PRODUCTION_OF_MOLECULAR_MEDIATOR_OF_IMMUNE_RESPONSE		36	0.327822	0.957632	0.494208	0.48568	1	6346	tags=39%, list=11%, signal=44%
GO_HIPPO_SIGNALING	GO_HIPPO_SIGNALING		43	0.352053	0.957396	0.525253	0.485716	1	2785	tags=23%, list=5%, signal=24%
GO_NEUTRAL_AMINO_ACID_TRANSPORT	GO_NEUTRAL_AMINO_ACID_TRANSPORT		43	0.30142	0.957167	0.486486	0.485723	1	5313	tags=28%, list=10%, signal=31%
GO_EPIBOLY	GO_EPIBOLY		34	0.313173	0.954369	0.504854	0.489487	1	2390	tags=24%, list=4%, signal=25%
GO_NEURON_PROJECTION_ARBORIZATION	GO_NEURON_PROJECTION_ARBORIZATION		26	0.324862	0.950453	0.523346	0.494772	1	3894	tags=31%, list=7%, signal=33%
GO_RECEPTOR_BIOSYNTHETIC_PROCESS	GO_RECEPTOR_BIOSYNTHETIC_PROCESS		28	0.317824	0.947784	0.562141	0.498422	1	9154	tags=32%, list=17%, signal=38%
GO_PROXIMAL_DISTAL_PATTERN_FORMATION	GO_PROXIMAL_DISTAL_PATTERN_FORMATION		33	0.349113	0.947639	0.501901	0.498278	1	10217	tags=48%, list=18%, signal=59%
GO_HEAD_MORPHOGENESIS	GO_HEAD_MORPHOGENESIS		36	0.313291	0.947356	0.524272	0.498347	1	5002	tags=28%, list=9%, signal=31%
GO_PHOTOTRANSDUCTION_VISIBLE_LIGHT	GO_PHOTOTRANSDUCTION_VISIBLE_LIGHT		34	0.284432	0.947068	0.533088	0.498431	1	6269	tags=29%, list=11%, signal=33%
GO_PROTEIN_LOCALIZATION_TO_CHROMOSOME_CENTROMERIC_REGION	GO_PROTEIN_LOCALIZATION_TO_CHROMOSOME_CENTROMERIC_REGION		22	0.384581	0.946925	0.54326	0.498309	1	7283	tags=55%, list=13%, signal=63%
GO_CALCIUM_DEPENDENT_CELL_CELL_ADHESION_VIA_PLASMA_MEMBRANE_CELL_ADHESION_MOLECULES	GO_CALCIUM_DEPENDENT_CELL_CELL_ADHESION_VIA_PLASMA_MEMBRANE_CELL_ADHESION_MOLECULES		43	0.318238	0.945388	0.532946	0.500324	1	6427	tags=35%, list=12%, signal=39%
GO_NOTOCHORD_DEVELOPMENT	GO_NOTOCHORD_DEVELOPMENT		20	0.346978	0.945242	0.514507	0.500237	1	10930	tags=55%, list=20%, signal=68%
GO_POSITIVE_REGULATION_OF_SPROUTING_ANGIOGENESIS	GO_POSITIVE_REGULATION_OF_SPROUTING_ANGIOGENESIS		59	0.282957	0.945083	0.511494	0.500133	1	2785	tags=15%, list=5%, signal=16%
GO_VASCULAR_ENDOTHELIAL_CELL_PROLIFERATION	GO_VASCULAR_ENDOTHELIAL_CELL_PROLIFERATION		41	0.28585	0.944842	0.548515	0.500159	1	5582	tags=20%, list=10%, signal=22%
GO_PROTEIN_TARGETING_TO_VACUOLE	GO_PROTEIN_TARGETING_TO_VACUOLE		40	0.344562	0.944592	0.54326	0.500235	1	5896	tags=40%, list=11%, signal=45%
GO_POSITIVE_REGULATION_OF_VASOCONSTRICTION	GO_POSITIVE_REGULATION_OF_VASOCONSTRICTION		33	0.315509	0.944488	0.528487	0.500049	1	6146	tags=27%, list=11%, signal=31%
GO_AXIS_ELONGATION	GO_AXIS_ELONGATION		30	0.331164	0.944119	0.505576	0.500286	1	9428	tags=47%, list=17%, signal=56%
GO_HISTONE_MONOUBIQUITINATION	GO_HISTONE_MONOUBIQUITINATION		29	0.348506	0.943682	0.525194	0.500578	1	4187	tags=24%, list=8%, signal=26%
GO_APPENDAGE_DEVELOPMENT	GO_APPENDAGE_DEVELOPMENT		181	0.268704	0.942761	0.49162	0.501594	1	5466	tags=23%, list=10%, signal=25%
GO_RESPONSE_TO_NITRIC_OXIDE	GO_RESPONSE_TO_NITRIC_OXIDE		20	0.330574	0.942462	0.525391	0.501711	1	7555	tags=40%, list=14%, signal=46%
GO_RIBONUCLEOSIDE_CATABOLIC_PROCESS	GO_RIBONUCLEOSIDE_CATABOLIC_PROCESS		22	0.327938	0.94126	0.536145	0.503133	1	6886	tags=45%, list=12%, signal=52%
GO_NEGATIVE_REGULATION_OF_BMP_SIGNALING_PATHWAY	GO_NEGATIVE_REGULATION_OF_BMP_SIGNALING_PATHWAY		51	0.283762	0.941205	0.518518	0.502869	1	3894	tags=20%, list=7%, signal=21%
GO_CATECHOLAMINE_BIOSYNTHETIC_PROCESS	GO_CATECHOLAMINE_BIOSYNTHETIC_PROCESS		21	0.323062	0.938442	0.536346	0.506646	1	3746	tags=29%, list=7%, signal=31%
GO_SERINE_PHOSPHORYLATION_OF_STAT_PROTEIN	GO_SERINE_PHOSPHORYLATION_OF_STAT_PROTEIN		27	0.290938	0.93832	0.541494	0.506498	1	10513	tags=37%, list=19%, signal=46%
GO_EMBRYONIC_SKELETAL_SYSTEM_MORPHOGENESIS	GO_EMBRYONIC_SKELETAL_SYSTEM_MORPHOGENESIS		97	0.288855	0.938026	0.535185	0.506609	1	6257	tags=28%, list=11%, signal=31%
GO_REGULATION_OF_SMAD_PROTEIN_SIGNAL_TRANSDUCTION	GO_REGULATION_OF_SMAD_PROTEIN_SIGNAL_TRANSDUCTION		26	0.308766	0.937246	0.54352	0.50749	1	3978	tags=23%, list=7%, signal=25%
GO_REGULATION_OF_HEMATOPOIETIC_PROGENITOR_CELL_DIFFERENTIATION	GO_REGULATION_OF_HEMATOPOIETIC_PROGENITOR_CELL_DIFFERENTIATION		86	0.278662	0.933622	0.555773	0.51245	1	7684	tags=34%, list=14%, signal=39%
GO_REGULATION_OF_CYTOPLASMIC_TRANSLATION	GO_REGULATION_OF_CYTOPLASMIC_TRANSLATION		30	0.322995	0.931501	0.557282	0.515265	1	4167	tags=20%, list=8%, signal=22%
GO_INTESTINAL_ABSORPTION	GO_INTESTINAL_ABSORPTION		40	0.296722	0.930754	0.581532	0.516039	1	4992	tags=28%, list=9%, signal=30%
GO_KINETOCHORE_ORGANIZATION	GO_KINETOCHORE_ORGANIZATION		22	0.364674	0.929386	0.544555	0.517749	1	6955	tags=55%, list=13%, signal=62%
GO_RESPONSE_TO_VITAMIN_D	GO_RESPONSE_TO_VITAMIN_D		36	0.286316	0.92829	0.554286	0.519065	1	8354	tags=33%, list=15%, signal=39%
GO_POSITIVE_REGULATION_OF_DNA_TEMPLATED_TRANSCRIPTION_INITIATION	GO_POSITIVE_REGULATION_OF_DNA_TEMPLATED_TRANSCRIPTION_INITIATION		38	0.302761	0.928163	0.571429	0.518935	1	4043	tags=24%, list=7%, signal=26%
GO_REGULATION_OF_PHOSPHOLIPID_BIOSYNTHETIC_PROCESS	GO_REGULATION_OF_PHOSPHOLIPID_BIOSYNTHETIC_PROCESS		20	0.316579	0.927932	0.553498	0.518928	1	4455	tags=25%, list=8%, signal=27%
GO_REGULATION_OF_TELOMERE_CAPPING	GO_REGULATION_OF_TELOMERE_CAPPING		26	0.327235	0.927603	0.552419	0.51906	1	8657	tags=50%, list=16%, signal=59%
GO_REGULATION_OF_CELL_CYCLE_CHECKPOINT	GO_REGULATION_OF_CELL_CYCLE_CHECKPOINT		31	0.316453	0.925048	0.543137	0.522529	1	2583	tags=23%, list=5%, signal=24%
GO_REGULATION_OF_CAMP_DEPENDENT_PROTEIN_KINASE_ACTIVITY	GO_REGULATION_OF_CAMP_DEPENDENT_PROTEIN_KINASE_ACTIVITY		20	0.30533	0.924582	0.550193	0.52289	1	9270	tags=50%, list=17%, signal=60%
GO_MUSCLE_FILAMENT_SLIDING	GO_MUSCLE_FILAMENT_SLIDING		39	0.428754	0.922766	0.51875	0.525242	1	11598	tags=49%, list=21%, signal=62%
GO_RHYTHMIC_BEHAVIOR	GO_RHYTHMIC_BEHAVIOR		50	0.265829	0.920358	0.598441	0.528544	1	4930	tags=22%, list=9%, signal=24%
GO_REGULATION_OF_CENTROSOME_DUPLICATION	GO_REGULATION_OF_CENTROSOME_DUPLICATION		44	0.302906	0.919673	0.544	0.529242	1	4170	tags=23%, list=8%, signal=25%
GO_POSITIVE_REGULATION_OF_TRANSCRIPTION_INITIATION_FROM_RNA_POLYMERASE_II_PROMOTER	GO_POSITIVE_REGULATION_OF_TRANSCRIPTION_INITIATION_FROM_RNA_POLYMERASE_II_PROMOTER		31	0.301535	0.919278	0.580078	0.529492	1	4043	tags=23%, list=7%, signal=24%
GO_PROTEIN_LOCALIZATION_TO_ENDOPLASMIC_RETICULUM	GO_PROTEIN_LOCALIZATION_TO_ENDOPLASMIC_RETICULUM		148	0.33759	0.919209	0.537344	0.529253	1	8544	tags=49%, list=15%, signal=57%
GO_NEGATIVE_REGULATION_OF_PEPTIDYL_THREONINE_PHOSPHORYLATION	GO_NEGATIVE_REGULATION_OF_PEPTIDYL_THREONINE_PHOSPHORYLATION		20	0.326354	0.919126	0.563601	0.529018	1	5224	tags=30%, list=9%, signal=33%
GO_PROTEIN_LOCALIZATION_TO_MICROTUBULE_ORGANIZING_CENTER	GO_PROTEIN_LOCALIZATION_TO_MICROTUBULE_ORGANIZING_CENTER		33	0.328248	0.918997	0.530333	0.52887	1	4179	tags=27%, list=8%, signal=29%
GO_HEPARAN_SULFATE_PROTEOGLYCAN_METABOLIC_PROCESS	GO_HEPARAN_SULFATE_PROTEOGLYCAN_METABOLIC_PROCESS		32	0.331233	0.918952	0.57529	0.528579	1	5903	tags=34%, list=11%, signal=38%
GO_REGULATION_OF_DNA_TEMPLATED_TRANSCRIPTION_INITIATION	GO_REGULATION_OF_DNA_TEMPLATED_TRANSCRIPTION_INITIATION		46	0.297561	0.918883	0.557087	0.528325	1	4043	tags=24%, list=7%, signal=26%
GO_REGULATION_OF_DNA_METHYLATION	GO_REGULATION_OF_DNA_METHYLATION		26	0.311551	0.918637	0.561404	0.528337	1	3433	tags=19%, list=6%, signal=20%
GO_REGULATION_OF_TRANSCRIPTION_INITIATION_FROM_RNA_POLYMERASE_II_PROMOTER	GO_REGULATION_OF_TRANSCRIPTION_INITIATION_FROM_RNA_POLYMERASE_II_PROMOTER		37	0.302591	0.918424	0.554902	0.528327	1	4043	tags=24%, list=7%, signal=26%
GO_POSITIVE_REGULATION_OF_RNA_SPLICING	GO_POSITIVE_REGULATION_OF_RNA_SPLICING		37	0.314261	0.918388	0.54898	0.528041	1	6215	tags=32%, list=11%, signal=37%
GO_MAINTENANCE_OF_GASTROINTESTINAL_EPITHELIUM	GO_MAINTENANCE_OF_GASTROINTESTINAL_EPITHELIUM		21	0.322651	0.917979	0.575581	0.528316	1	4508	tags=29%, list=8%, signal=31%
GO_REGULATION_OF_ACTIN_NUCLEATION	GO_REGULATION_OF_ACTIN_NUCLEATION		30	0.312545	0.916033	0.566735	0.530908	1	5640	tags=33%, list=10%, signal=37%
GO_REGULATION_OF_HISTONE_MODIFICATION	GO_REGULATION_OF_HISTONE_MODIFICATION		149	0.269143	0.914409	0.566	0.533032	1	7044	tags=32%, list=13%, signal=36%
GO_CENTROSOME_DUPLICATION	GO_CENTROSOME_DUPLICATION		68	0.297932	0.911723	0.563241	0.536708	1	5940	tags=25%, list=11%, signal=28%
GO_NUCLEOTIDE_EXCISION_REPAIR_DNA_INCISION	GO_NUCLEOTIDE_EXCISION_REPAIR_DNA_INCISION		39	0.302693	0.910824	0.5762	0.53768	1	5158	tags=31%, list=9%, signal=34%
GO_CELLULAR_RESPONSE_TO_PROSTAGLANDIN_STIMULUS	GO_CELLULAR_RESPONSE_TO_PROSTAGLANDIN_STIMULUS		22	0.324118	0.909744	0.586667	0.538987	1	3296	tags=27%, list=6%, signal=29%
GO_RNA_POLYMERASE_II_PREINITIATION_COMPLEX_ASSEMBLY	GO_RNA_POLYMERASE_II_PREINITIATION_COMPLEX_ASSEMBLY		25	0.324166	0.909497	0.561776	0.539001	1	4886	tags=28%, list=9%, signal=31%
GO_PEPTIDYL_LYSINE_ACETYLATION	GO_PEPTIDYL_LYSINE_ACETYLATION		172	0.27101	0.908024	0.564257	0.540913	1	5452	tags=27%, list=10%, signal=30%
GO_MISMATCH_REPAIR	GO_MISMATCH_REPAIR		38	0.319644	0.90773	0.549696	0.54103	1	6588	tags=37%, list=12%, signal=42%
GO_PLATELET_DERIVED_GROWTH_FACTOR_RECEPTOR_SIGNALING_PATHWAY	GO_PLATELET_DERIVED_GROWTH_FACTOR_RECEPTOR_SIGNALING_PATHWAY		58	0.293231	0.904444	0.559524	0.545762	1	6597	tags=31%, list=12%, signal=35%
GO_REGULATION_OF_DNA_TEMPLATED_TRANSCRIPTION_IN_RESPONSE_TO_STRESS	GO_REGULATION_OF_DNA_TEMPLATED_TRANSCRIPTION_IN_RESPONSE_TO_STRESS		115	0.254608	0.902875	0.582178	0.547879	1	6425	tags=27%, list=12%, signal=30%
GO_MORPHOGENESIS_OF_AN_EPITHELIAL_FOLD	GO_MORPHOGENESIS_OF_AN_EPITHELIAL_FOLD		25	0.31997	0.901917	0.571164	0.548988	1	5413	tags=32%, list=10%, signal=35%
GO_ADAPTATION_OF_SIGNALING_PATHWAY	GO_ADAPTATION_OF_SIGNALING_PATHWAY		22	0.309635	0.901176	0.590822	0.549799	1	6774	tags=27%, list=12%, signal=31%
GO_REGULATION_OF_MICROTUBULE_DEPOLYMERIZATION	GO_REGULATION_OF_MICROTUBULE_DEPOLYMERIZATION		31	0.300533	0.901157	0.578218	0.549478	1	4334	tags=19%, list=8%, signal=21%
GO_NATURAL_KILLER_CELL_DIFFERENTIATION	GO_NATURAL_KILLER_CELL_DIFFERENTIATION		22	0.323385	0.900346	0.590361	0.550367	1	5918	tags=36%, list=11%, signal=41%
GO_INTERMEDIATE_FILAMENT_ORGANIZATION	GO_INTERMEDIATE_FILAMENT_ORGANIZATION		25	0.324594	0.899608	0.550669	0.551097	1	2650	tags=20%, list=5%, signal=21%
GO_GASTRULATION_WITH_MOUTH_FORMING_SECOND	GO_GASTRULATION_WITH_MOUTH_FORMING_SECOND		27	0.329982	0.8949	0.601547	0.557887	1	7808	tags=41%, list=14%, signal=47%
GO_PHOSPHATIDYLCHOLINE_BIOSYNTHETIC_PROCESS	GO_PHOSPHATIDYLCHOLINE_BIOSYNTHETIC_PROCESS		39	0.26146	0.894054	0.614931	0.558823	1	3499	tags=18%, list=6%, signal=19%
GO_HISTONE_H4_ACETYLATION	GO_HISTONE_H4_ACETYLATION		70	0.291603	0.893315	0.577778	0.559651	1	8399	tags=36%, list=15%, signal=42%
GO_NUCLEOTIDE_EXCISION_REPAIR	GO_NUCLEOTIDE_EXCISION_REPAIR		109	0.267048	0.888227	0.561616	0.567298	1	5672	tags=25%, list=10%, signal=28%
GO_POSITIVE_REGULATION_OF_TOR_SIGNALING	GO_POSITIVE_REGULATION_OF_TOR_SIGNALING		43	0.269401	0.887222	0.609603	0.568515	1	5340	tags=21%, list=10%, signal=23%
GO_POSITIVE_REGULATION_OF_GLYCOPROTEIN_BIOSYNTHETIC_PROCESS	GO_POSITIVE_REGULATION_OF_GLYCOPROTEIN_BIOSYNTHETIC_PROCESS		22	0.319871	0.886053	0.620424	0.569925	1	4909	tags=27%, list=9%, signal=30%
GO_POSITIVE_REGULATION_OF_CHOLESTEROL_EFFLUX	GO_POSITIVE_REGULATION_OF_CHOLESTEROL_EFFLUX		20	0.319479	0.884931	0.619145	0.571291	1	8094	tags=45%, list=15%, signal=53%
GO_REGULATION_OF_HISTONE_METHYLATION	GO_REGULATION_OF_HISTONE_METHYLATION		67	0.290869	0.883837	0.575397	0.572659	1	8304	tags=31%, list=15%, signal=37%
GO_ERROR_FREE_TRANSLESION_SYNTHESIS	GO_ERROR_FREE_TRANSLESION_SYNTHESIS		22	0.325827	0.881559	0.604463	0.575815	1	7683	tags=41%, list=14%, signal=47%
GO_EMBRYONIC_DIGESTIVE_TRACT_DEVELOPMENT	GO_EMBRYONIC_DIGESTIVE_TRACT_DEVELOPMENT		34	0.29967	0.880243	0.617934	0.577485	1	6349	tags=32%, list=11%, signal=37%
GO_POSITIVE_REGULATION_OF_CALCIUM_MEDIATED_SIGNALING	GO_POSITIVE_REGULATION_OF_CALCIUM_MEDIATED_SIGNALING		43	0.280446	0.880093	0.633947	0.577335	1	9731	tags=35%, list=18%, signal=42%
GO_HYPOTHALAMUS_DEVELOPMENT	GO_HYPOTHALAMUS_DEVELOPMENT		21	0.308878	0.879581	0.651663	0.577762	1	3076	tags=19%, list=6%, signal=20%
GO_RESPONSE_TO_MITOCHONDRIAL_DEPOLARISATION	GO_RESPONSE_TO_MITOCHONDRIAL_DEPOLARISATION		21	0.308157	0.873221	0.601179	0.587352	1	7176	tags=38%, list=13%, signal=44%
GO_POSITIVE_REGULATION_OF_PROTEIN_DEPHOSPHORYLATION	GO_POSITIVE_REGULATION_OF_PROTEIN_DEPHOSPHORYLATION		44	0.275794	0.871922	0.623762	0.588937	1	7870	tags=36%, list=14%, signal=42%
GO_PROTEIN_SUMOYLATION	GO_PROTEIN_SUMOYLATION		82	0.292239	0.871005	0.625984	0.590041	1	3932	tags=20%, list=7%, signal=21%
GO_NEGATIVE_REGULATION_OF_DEFENSE_RESPONSE_TO_VIRUS	GO_NEGATIVE_REGULATION_OF_DEFENSE_RESPONSE_TO_VIRUS		25	0.297084	0.869524	0.662083	0.591972	1	2548	tags=20%, list=5%, signal=21%
GO_TRNA_TRANSPORT	GO_TRNA_TRANSPORT		37	0.334294	0.867856	0.603083	0.594155	1	6680	tags=30%, list=12%, signal=34%
GO_RNA_EXPORT_FROM_NUCLEUS	GO_RNA_EXPORT_FROM_NUCLEUS		144	0.280971	0.865125	0.594488	0.598012	1	4059	tags=18%, list=7%, signal=19%
GO_POSITIVE_REGULATION_OF_CELLULAR_RESPONSE_TO_INSULIN_STIMULUS	GO_POSITIVE_REGULATION_OF_CELLULAR_RESPONSE_TO_INSULIN_STIMULUS		27	0.29768	0.865079	0.637339	0.597699	1	6996	tags=37%, list=13%, signal=42%
GO_NEURON_DEATH_IN_RESPONSE_TO_OXIDATIVE_STRESS	GO_NEURON_DEATH_IN_RESPONSE_TO_OXIDATIVE_STRESS		30	0.278719	0.863197	0.64786	0.60021	1	7284	tags=40%, list=13%, signal=46%
GO_LEUKOTRIENE_METABOLIC_PROCESS	GO_LEUKOTRIENE_METABOLIC_PROCESS		35	0.285658	0.859337	0.66004	0.605849	1	6607	tags=26%, list=12%, signal=29%
GO_NEGATIVE_REGULATION_OF_FIBROBLAST_PROLIFERATION	GO_NEGATIVE_REGULATION_OF_FIBROBLAST_PROLIFERATION		30	0.26819	0.857805	0.681275	0.607892	1	5841	tags=27%, list=11%, signal=30%
GO_INTERSTRAND_CROSS_LINK_REPAIR	GO_INTERSTRAND_CROSS_LINK_REPAIR		55	0.284918	0.85618	0.612903	0.61013	1	6588	tags=35%, list=12%, signal=39%
GO_CHONDROITIN_SULFATE_BIOSYNTHETIC_PROCESS	GO_CHONDROITIN_SULFATE_BIOSYNTHETIC_PROCESS		26	0.309806	0.85551	0.620332	0.61084	1	8964	tags=42%, list=16%, signal=50%
GO_FOLIC_ACID_METABOLIC_PROCESS	GO_FOLIC_ACID_METABOLIC_PROCESS		20	0.312575	0.852589	0.668712	0.615115	1	4601	tags=25%, list=8%, signal=27%
GO_SEROTONIN_RECEPTOR_SIGNALING_PATHWAY	GO_SEROTONIN_RECEPTOR_SIGNALING_PATHWAY		39	0.264155	0.849791	0.720238	0.619193	1	6717	tags=21%, list=12%, signal=23%
GO_CELLULAR_RESPONSE_TO_ARSENIC_CONTAINING_SUBSTANCE	GO_CELLULAR_RESPONSE_TO_ARSENIC_CONTAINING_SUBSTANCE		20	0.284251	0.846852	0.650295	0.623526	1	6058	tags=30%, list=11%, signal=34%
GO_PLASMINOGEN_ACTIVATION	GO_PLASMINOGEN_ACTIVATION		23	0.328302	0.845398	0.651394	0.625476	1	5386	tags=26%, list=10%, signal=29%
GO_DENDRITIC_CELL_CHEMOTAXIS	GO_DENDRITIC_CELL_CHEMOTAXIS		24	0.339669	0.844262	0.627639	0.626904	1	6190	tags=42%, list=11%, signal=47%
GO_REGULATION_OF_CENTRIOLE_REPLICATION	GO_REGULATION_OF_CENTRIOLE_REPLICATION		23	0.308586	0.839083	0.619608	0.634711	1	1923	tags=22%, list=3%, signal=23%
GO_DNA_METHYLATION_DEPENDENT_HETEROCHROMATIN_ASSEMBLY	GO_DNA_METHYLATION_DEPENDENT_HETEROCHROMATIN_ASSEMBLY		20	0.328809	0.838919	0.616302	0.634547	1	4677	tags=25%, list=8%, signal=27%
GO_CHAPERONE_MEDIATED_PROTEIN_COMPLEX_ASSEMBLY	GO_CHAPERONE_MEDIATED_PROTEIN_COMPLEX_ASSEMBLY		22	0.295025	0.834449	0.681818	0.641341	1	4570	tags=23%, list=8%, signal=25%
GO_REGULATION_OF_DNA_TEMPLATED_TRANSCRIPTION_ELONGATION	GO_REGULATION_OF_DNA_TEMPLATED_TRANSCRIPTION_ELONGATION		48	0.283947	0.83081	0.653307	0.646853	1	5225	tags=23%, list=9%, signal=25%
GO_MRNA_EXPORT_FROM_NUCLEUS	GO_MRNA_EXPORT_FROM_NUCLEUS		113	0.277927	0.825948	0.653923	0.654254	1	4536	tags=18%, list=8%, signal=19%
GO_POSITIVE_REGULATION_OF_HISTONE_METHYLATION	GO_POSITIVE_REGULATION_OF_HISTONE_METHYLATION		41	0.278997	0.822788	0.668675	0.658948	1	8796	tags=34%, list=16%, signal=41%
GO_REGULATION_OF_TRANSPOSITION	GO_REGULATION_OF_TRANSPOSITION		24	0.305413	0.816654	0.669261	0.668421	1	7579	tags=42%, list=14%, signal=48%
GO_SECONDARY_METABOLIC_PROCESS	GO_SECONDARY_METABOLIC_PROCESS		60	0.253046	0.815385	0.752456	0.669982	1	3894	tags=15%, list=7%, signal=16%
GO_POSITIVE_REGULATION_OF_CYTOSOLIC_CALCIUM_ION_CONCENTRATION_INVOLVED_IN_PHOSPHOLIPASE_C_ACTIVATING_G_PROTEIN_COUPLED_SIGNALING_PATHWAY	GO_POSITIVE_REGULATION_OF_CYTOSOLIC_CALCIUM_ION_CONCENTRATION_INVOLVED_IN_PHOSPHOLIPASE_C_ACTIVATING_G_PROTEIN_COUPLED_SIGNALING_PATHWAY		34	0.28302	0.814611	0.716418	0.670793	1	8730	tags=35%, list=16%, signal=42%
GO_RESPONSE_TO_PH	GO_RESPONSE_TO_PH		42	0.247609	0.812313	0.778641	0.674004	1	8730	tags=29%, list=16%, signal=34%
GO_RNA_CAPPING	GO_RNA_CAPPING		34	0.282844	0.808393	0.691511	0.679865	1	6315	tags=24%, list=11%, signal=27%
GO_SKELETAL_MUSCLE_ADAPTATION	GO_SKELETAL_MUSCLE_ADAPTATION		26	0.314155	0.802492	0.636	0.68879	1	8197	tags=35%, list=15%, signal=41%
GO_NEGATIVE_REGULATION_OF_CYTOKINE_PRODUCTION_INVOLVED_IN_INFLAMMATORY_RESPONSE	GO_NEGATIVE_REGULATION_OF_CYTOKINE_PRODUCTION_INVOLVED_IN_INFLAMMATORY_RESPONSE		33	0.255169	0.800294	0.730845	0.691837	1	8289	tags=27%, list=15%, signal=32%
GO_HISTONE_UBIQUITINATION	GO_HISTONE_UBIQUITINATION		48	0.274453	0.799408	0.700389	0.692887	1	6652	tags=25%, list=12%, signal=28%
GO_PRODUCTION_OF_SMALL_RNA_INVOLVED_IN_GENE_SILENCING_BY_RNA	GO_PRODUCTION_OF_SMALL_RNA_INVOLVED_IN_GENE_SILENCING_BY_RNA		53	0.278715	0.798924	0.674374	0.693226	1	6346	tags=32%, list=11%, signal=36%
GO_SKELETAL_MUSCLE_CONTRACTION	GO_SKELETAL_MUSCLE_CONTRACTION		43	0.320963	0.793329	0.644681	0.701959	1	10164	tags=49%, list=18%, signal=60%
GO_KILLING_OF_CELLS_IN_OTHER_ORGANISM_INVOLVED_IN_SYMBIOTIC_INTERACTION	GO_KILLING_OF_CELLS_IN_OTHER_ORGANISM_INVOLVED_IN_SYMBIOTIC_INTERACTION		28	0.289403	0.791124	0.727273	0.705122	1	10309	tags=39%, list=19%, signal=48%
GO_CHONDROITIN_SULFATE_PROTEOGLYCAN_BIOSYNTHETIC_PROCESS	GO_CHONDROITIN_SULFATE_PROTEOGLYCAN_BIOSYNTHETIC_PROCESS		31	0.272088	0.786742	0.771784	0.711681	1	8964	tags=39%, list=16%, signal=46%
GO_REGULATION_OF_FEEDING_BEHAVIOR	GO_REGULATION_OF_FEEDING_BEHAVIOR		25	0.246876	0.780242	0.834016	0.721613	1	2188	tags=12%, list=4%, signal=12%
GO_NEGATIVE_REGULATION_OF_BLOOD_VESSEL_ENDOTHELIAL_CELL_PROLIFERATION_INVOLVED_IN_SPROUTING_ANGIOGENESIS	GO_NEGATIVE_REGULATION_OF_BLOOD_VESSEL_ENDOTHELIAL_CELL_PROLIFERATION_INVOLVED_IN_SPROUTING_ANGIOGENESIS		22	0.255577	0.777782	0.778226	0.725045	1	5338	tags=14%, list=10%, signal=15%
GO_REGULATION_OF_RNA_SPLICING	GO_REGULATION_OF_RNA_SPLICING		155	0.247444	0.754558	0.70935	0.760801	1	6215	tags=23%, list=11%, signal=25%
GO_NEGATIVE_REGULATION_OF_FATTY_ACID_BIOSYNTHETIC_PROCESS	GO_NEGATIVE_REGULATION_OF_FATTY_ACID_BIOSYNTHETIC_PROCESS		21	0.253701	0.7485	0.829126	0.76942	1	8490	tags=38%, list=15%, signal=45%
GO_ALTERNATIVE_MRNA_SPLICING_VIA_SPLICEOSOME	GO_ALTERNATIVE_MRNA_SPLICING_VIA_SPLICEOSOME		87	0.26025	0.737038	0.704225	0.786041	1	7359	tags=26%, list=13%, signal=30%
GO_ANAPHASE_PROMOTING_COMPLEX_DEPENDENT_CATABOLIC_PROCESS	GO_ANAPHASE_PROMOTING_COMPLEX_DEPENDENT_CATABOLIC_PROCESS		83	0.24816	0.728488	0.747968	0.797925	1	7684	tags=29%, list=14%, signal=34%
GO_DRUG_CATABOLIC_PROCESS	GO_DRUG_CATABOLIC_PROCESS		26	0.259438	0.726839	0.811175	0.799802	1	5900	tags=15%, list=11%, signal=17%
GO_MRNA_3_END_PROCESSING	GO_MRNA_3_END_PROCESSING		101	0.239544	0.715459	0.733728	0.815654	1	5619	tags=19%, list=10%, signal=21%
